# Supplementary material for: Ligand assisted Co( ii ) catalyzed direct C–H alkylation of aryl ketones with diverse alkyl halides
Source: Royal Society of Chemistry journal article supplement (doi:10.1039/d5sc09264g), 2026-01-01
Supplement: d5sc09264g1.pdf [file d5sc09264g1.pdf]

## Electronic Supplementary Information

### Ligand Assisted Co(II) Catalyzed Direct C-H Alkylation of Aryl Ketones with Diverse Alkyl Halides

Aniket Nigade, Saurabh Vinod Parmar and Vidya Avasare\*

Department of Chemistry, Ashoka University, Sonapat, Haryana-131029

#### Table of Contents

|      |                                                                                                                         |      |
|------|-------------------------------------------------------------------------------------------------------------------------|------|
| 1.   | Materials and Methods.....                                                                                              | S2   |
| 2.   | General Experimental Procedure.....                                                                                     | S2   |
|      | • Synthesis of catalyst                                                                                                 |      |
| 3.   | Characterisation Details of Catalyst.....                                                                               | S4   |
| 4.   | General Procedure for C-H alkylation reaction.....                                                                      | S10  |
| 5.   | Kinetic Study.....                                                                                                      | S11  |
| 5.1. | Procedure for time-dependent NMR study                                                                                  |      |
| 5.2. | Competitive reaction between acetophenone and acetophenone-d <sub>5</sub>                                               |      |
| 5.3. | Kinetic isotope effect                                                                                                  |      |
| 6.   | Experimental Details and Spectroscopic Data ( <b>3a-3bt</b> ).....                                                      | S14  |
| 7.   | <sup>1</sup> H and <sup>13</sup> C NMR Spectra ( <b>3a-3bt</b> ).....                                                   | S39  |
| 8.   | <sup>1</sup> H and <sup>13</sup> C NMR and <sup>1</sup> H- <sup>1</sup> H COSY Spectra of Time-dependent NMR Study..... | S115 |
| 9.   | GC-MS Snapshots ( <b>3a-3bq</b> ).....                                                                                  | S121 |
| 10.  | Computational Details.....                                                                                              | S133 |
| 11.  | Thermodynamic stability study of <b>IN1</b> .....                                                                       | S134 |
| 12.  | NBO Analysis of <b>IN1b</b> , <b>IN1c</b> and Optimized Geometry of <b>IN5'</b> .....                                   | S135 |
| 13.  | TOF Calculations.....                                                                                                   | S135 |
| 14.  | Optimized geometries and Gibbs free energies of singlet Co-complex, <b>IN1c</b> ....                                    | S136 |
| 15.  | Optimized Geometries of All Intermediates.....                                                                          | S136 |
| 16.  | DFT study of Co(I)-acetophenone complex.....                                                                            | S137 |
| 17.  | Coordinates of Intermediates and Transition States.....                                                                 | S138 |
| 18.  | Summary of Gibbs Free Energies .....                                                                                    | S167 |
| 19.  | References.....                                                                                                         | S167 |

## 1. Methods, Materials, and Reagents:

Analytical thin-layer chromatography (TLC) was performed on Merck 60 F254 silica gel plates. Thin-layer chromatography plates were visualised by exposure to ultraviolet light (UV) and/or by immersion in a staining solution of 2,4-DNP/I<sub>2</sub>. Column chromatography was performed using 60-120  $\mu$ m silica gel. Commercial reagents were purchased from Merck, TCI, and other commercial suppliers and were used without further purification. Anhydrous cobalt(III) 2,4-pentanedionate (CAS No. 21679-46-9) was purchased from Alfa Aesar and used as received. Deuterated solvents CDCl<sub>3</sub>, CD<sub>3</sub>OD, and DMSO-d<sub>6</sub> were used without purification.

**Instrumentation:** <sup>1</sup>H and <sup>13</sup>C nuclear magnetic resonance (NMR) spectra were recorded on Bruker AV-400 (400 MHz) NMR spectrometers. Chemical shifts of the NMR spectra are reported relative to residual signals of CDCl<sub>3</sub> (<sup>1</sup>H NMR:  $\delta$  = 7.26 ppm, <sup>13</sup>C NMR:  $\delta$  = 77.16 ppm), CD<sub>3</sub>OD (<sup>1</sup>H-NMR:  $\delta$  = 3.31 ppm, <sup>13</sup>C-NMR:  $\delta$  = 49 ppm), DMSO-d<sub>6</sub> (<sup>1</sup>H-NMR:  $\delta$  = 2.50 ppm, <sup>13</sup>C-NMR:  $\delta$  = 39.52 ppm). The data are presented as follows: chemical shift; multiplicity (s = singlet, d = doublet, t = triplet, q = quartet, quint = quintet, m = multiplet and/or multiplet resonances); and coupling constant in Hertz (Hz). High-resolution mass spectra (HRMS) were obtained with a Q-ToF Premier LC-HR mass spectrometer. Electron paramagnetic resonance (EPR) measurements were performed at room temperature using a Bruker A3000-9.5/12/S/W spectrometer at 9.85 GHz. Cyclic voltammetry (CV) was performed using the Gamry interface 1010E Potentiostat. A Thermogravimetric Analyser (DT-TGA) TGA 5500 by TA Instruments was used to analyse the catalyst composition over a temperature range of 25 °C to 1000 °C. The magnetic property was established by using a vibrating sample magnetometer (VSM), Model No.: Microsense, Model ADE-EV9. Organic solvents were concentrated on a rotary evaporator.

### Abbreviations Used:

DFT = density functional theory, h = hours, m/z = mass to charge ratio, NMR = nuclear magnetic resonance, equiv. = equivalents, HRMS= High-resolution mass spectra, VSM= vibrating sample magnetometer, DT-TGA= Differential thermogravimetric analysis, Ph = phenyl, rt = room temperature, TLC = thin layer chromatography, 2,4-DNP = 2,4-dinitrophenyl hydrazine, Co(acac)<sub>3</sub> = Cobalt acetylacetonate, Co(OAc)<sub>3</sub> = Cobalt acetate.

## 2. General Experimental Procedures:

### 2.1. General Procedure for Preparation of Co(OAc)<sub>3</sub> from Co(acac)<sub>3</sub>

Co(acac)<sub>3</sub> (1.44 g, 4 mmol) was dissolved in methanol and stirred under ice-cold conditions. Then, glacial acetic acid (1.29 g, 20 mmol) was added at room temperature, and the reaction mixture was stirred for one hour. The resulting reaction mixture was refluxed for four hours and then cooled to room temperature. After the reaction was complete, the methanol and acetic acid were removed under vacuum using a rotary evaporator, yielding a green solid Co(OAc)<sub>3</sub> with a yield of 98%.

## 2.2. Synthesis of Cat-1

Fluorene (2.12 mmol, 0.351 g) was dissolved in 25 mL of dry methanol and stirred for 30 min under nitrogen to obtain a clear solution. Then, sodium (5 mmol, 115 mg) was added to the reaction mixture and stirred for one hour, followed by the addition of  $\text{Co}(\text{OAc})_3$  (2.12 mmol, 0.500 g), and the mixture was stirred until the solution changed from green to dark reddish-orange. The progress of the reaction was monitored using TLC. Once the **Cat-1** was formed, it was filtered to remove insoluble residues, then concentrated using a rotary vacuum, and purified by column chromatography using 10%, 20%, 30% and 50% DCM/hexanes mixture to eluate the catalyst. The eluents were concentrated using a rotary evaporator. Upon isolation and purification, the **Cat-1** (0.470 g) was obtained in 87% yield. The catalyst was dissolved in commercial-grade methanol and stored in a refrigerator for further use in C-H alkylation reactions. A small portion of the catalyst solution was taken, and the methanol was removed on a rotary evaporator to obtain the solid catalyst complex. This solid catalyst (48 mg, 5 mol%) was used in the C-H alkylation reactions as discussed in **Section 4**.

**$^1\text{H}$  NMR (400 MHz,  $\text{CD}_3\text{OD}$ ):**  $\delta$  7.82 (d,  $J$  = 7.5 Hz, 4H), 7.56 (d,  $J$  = 7.4 Hz, 4H), 7.37 (t,  $J$  = 7.4 Hz, 4H), 7.30 (td,  $J$  = 7.4, 1.0 Hz, 4H), 4.88 (s, 12H), 3.90 (s, 2H).

**$^{13}\text{C}$  NMR (101 MHz,  $\text{CD}_3\text{OD}$ ):**  $\delta$  143.0, 141.6, 126.4, 126.3, 124.6, 119.3, 48.2, 48.0, 47.8, 47.6, 47.40, 47.1, 46.9.

| S. No | Catalyst Molecular formula and form                                                            | Theoretical Mass                   | Observed Mass   |
|-------|------------------------------------------------------------------------------------------------|------------------------------------|-----------------|
| 1.    | $\text{C}_{13}\text{H}_{10}\text{CoO}$ (monomeric form)                                        | $[\text{M}+\text{H}]^+ = 242.0136$ | <b>242.0128</b> |
| 2.    | $\text{C}_{26}\text{H}_{20}\text{Co}_2\text{O}_2$ (active catalyst)                            | $[\text{M}+\text{H}]^+ = 483.0200$ | <b>483.0171</b> |
| 3.    | $\text{C}_{28}\text{H}_{28}\text{Co}_2\text{O}_4$ (active catalyst with two moles of methanol) | $[\text{M}]^+ = 546.0646$          | <b>546.0688</b> |
| 4.    | $\text{C}_{30}\text{H}_{36}\text{Co}_2\text{O}_6$ (dimer with solvent)                         | $[\text{M}+\text{H}]^+ = 611.1249$ | <b>611.1238</b> |

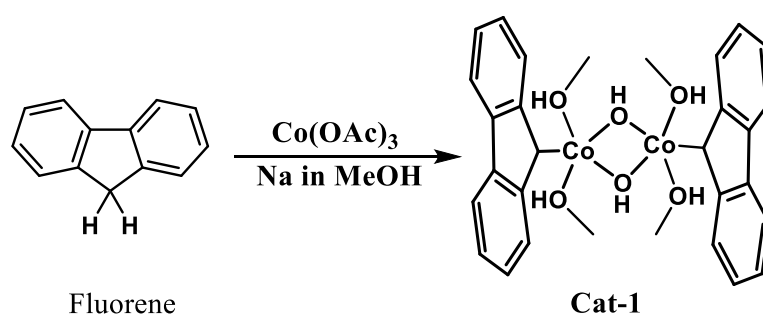

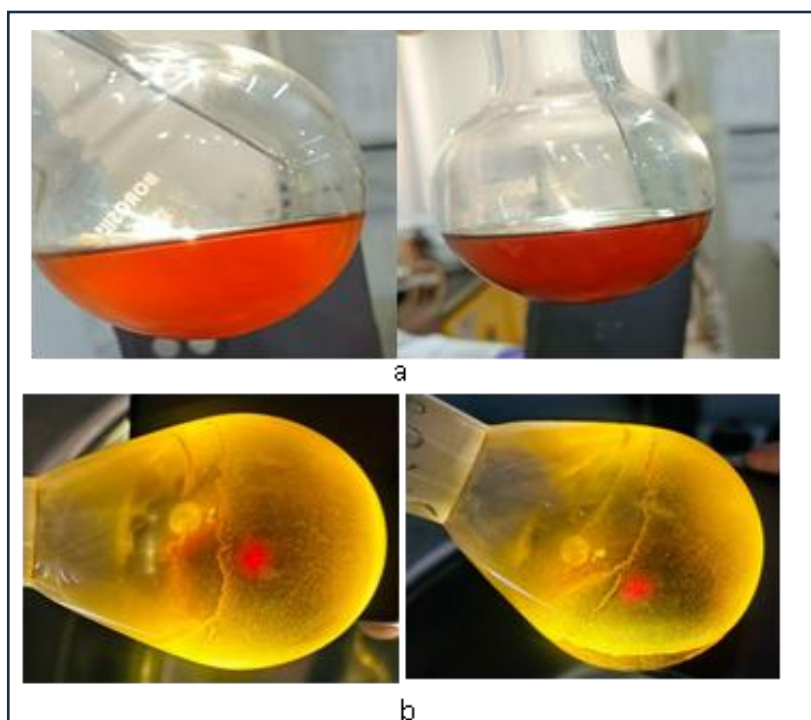

**Figure S1. Cat-1 (a) in methanol (b) showing fluorescence under white light**

### 3. Characterisation Details of Catalyst

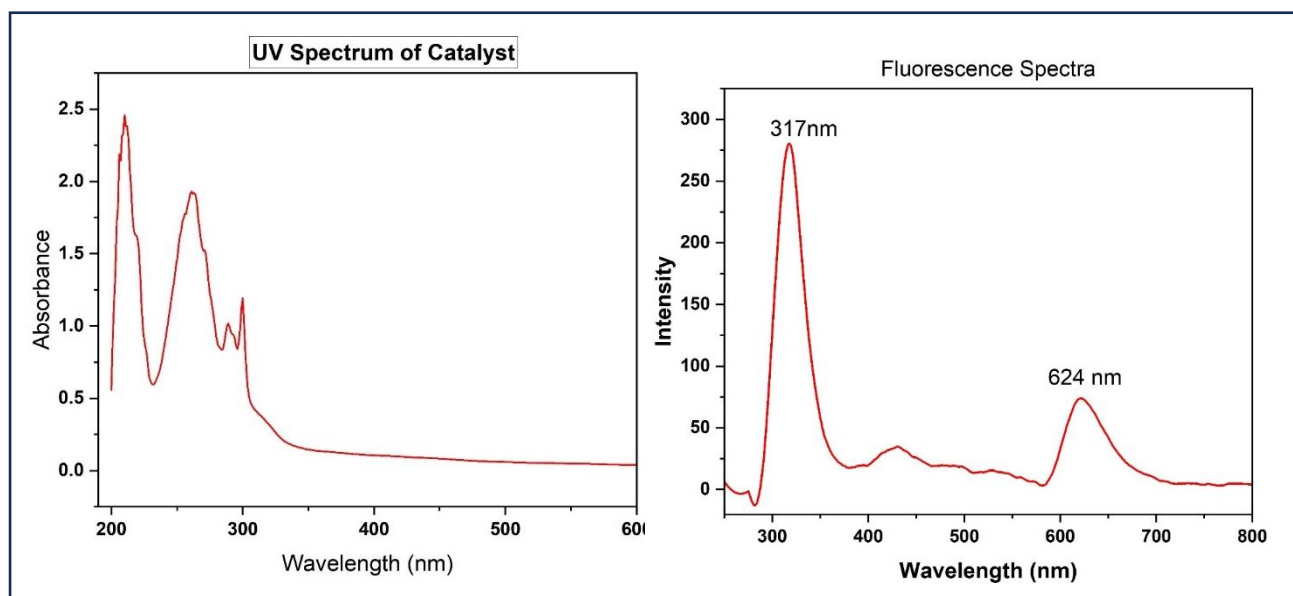

**Figure S2. UV & Fluorescence spectrum of Cat-1**



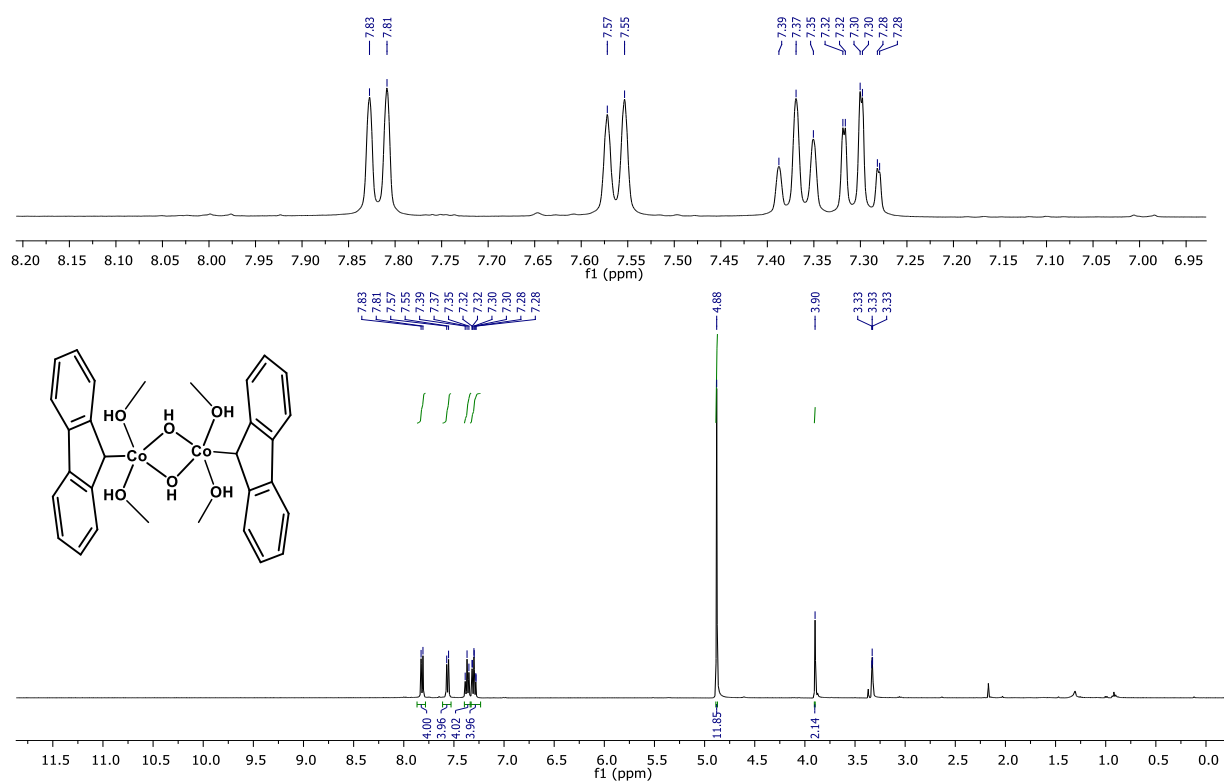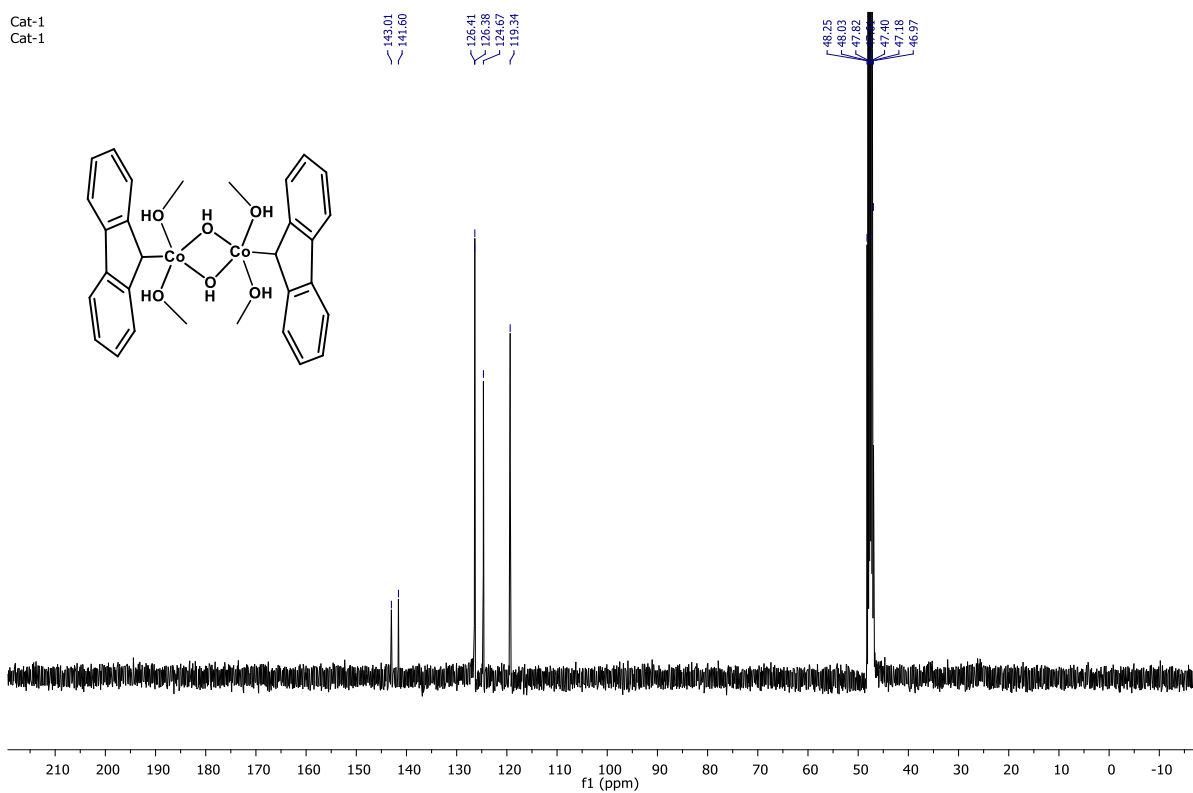

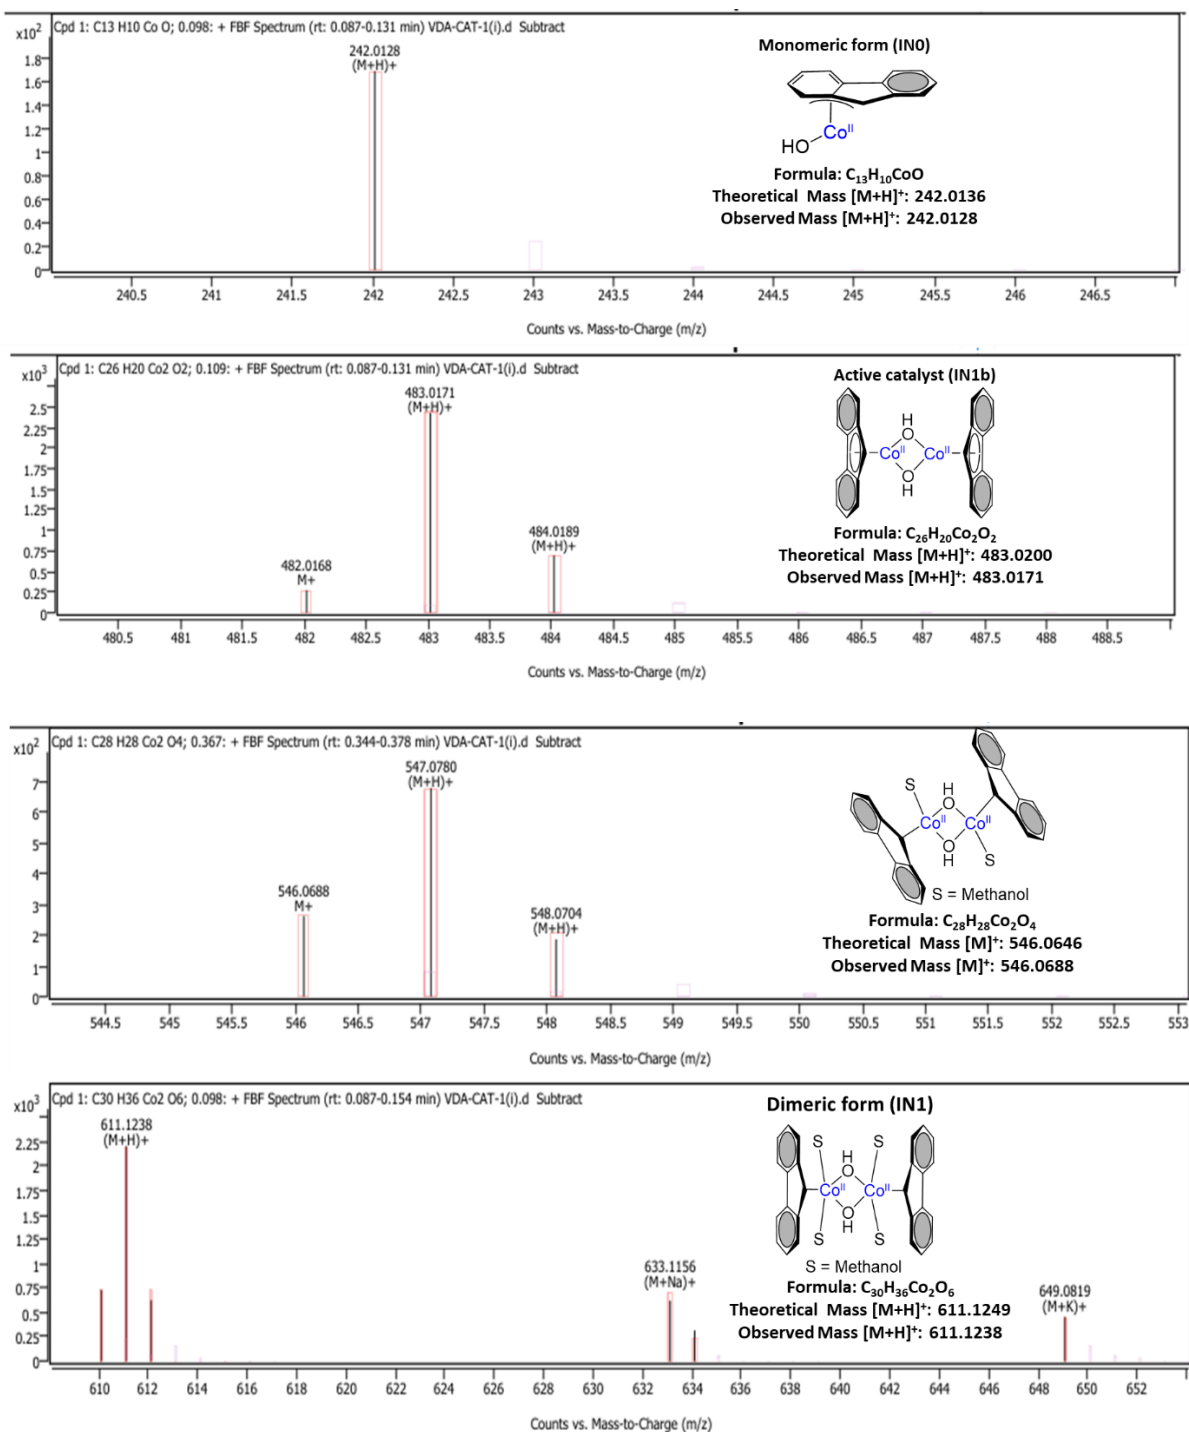

**Figure S5. HRMS spectrum of Cat-1**

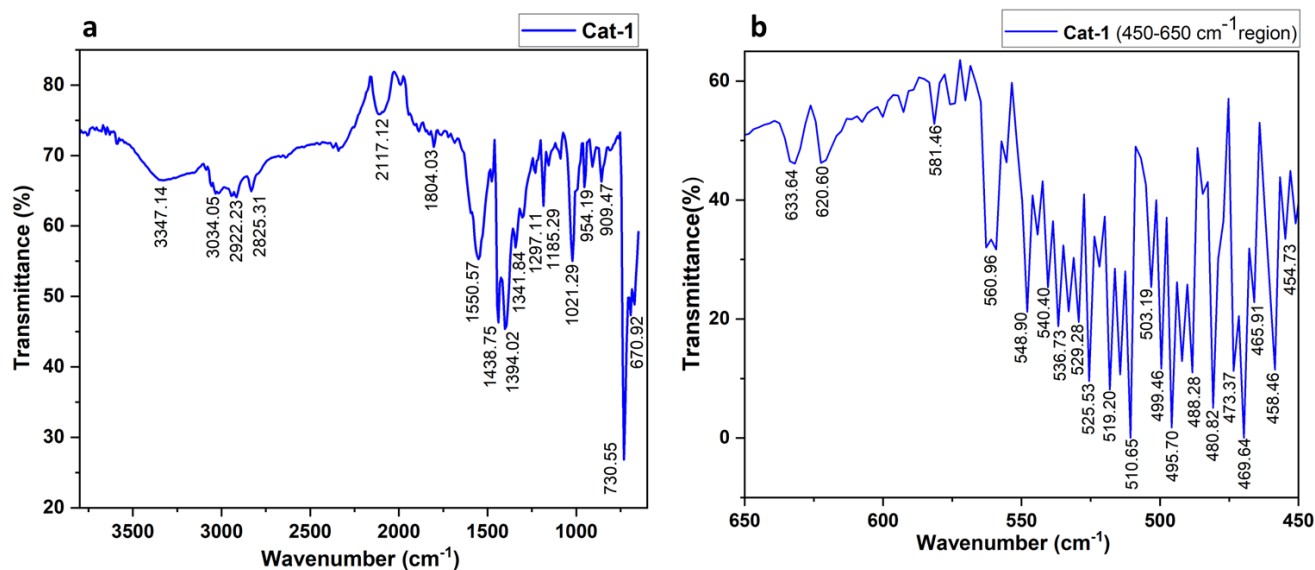

**Figure S6.** FT-IR spectrum of **Cat-1**

**FT-IR Analysis:** The above FT-IR spectrum clearly shows the presence of the following groups:

| S.No. | IR Frequency                      | Vibrations                             |
|-------|-----------------------------------|----------------------------------------|
| 1.    | 3347 $\text{cm}^{-1}$             | O-H stretching                         |
| 2.    | 3034, 2922, 2825 $\text{cm}^{-1}$ | Aliphatic and aromatic C-H stretching  |
| 3.    | 1438, 1550 $\text{cm}^{-1}$       | Aromatic ring stretching               |
| 4.    | 581, 560, 548 $\text{cm}^{-1}$    | Co-OH stretching                       |
| 5.    | 540, 510, 495 $\text{cm}^{-1}$    | Co-O(H)-Co bridging skeletal vibration |

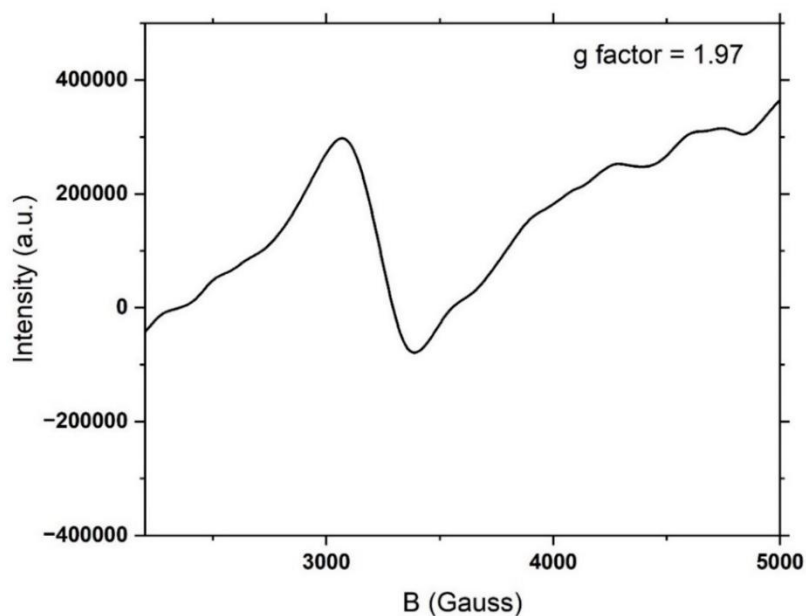

**Figure S7.** EPR of **Cat-1** in methanol (Instrument Frequency: 9.85 GHz, Temperature- RT)

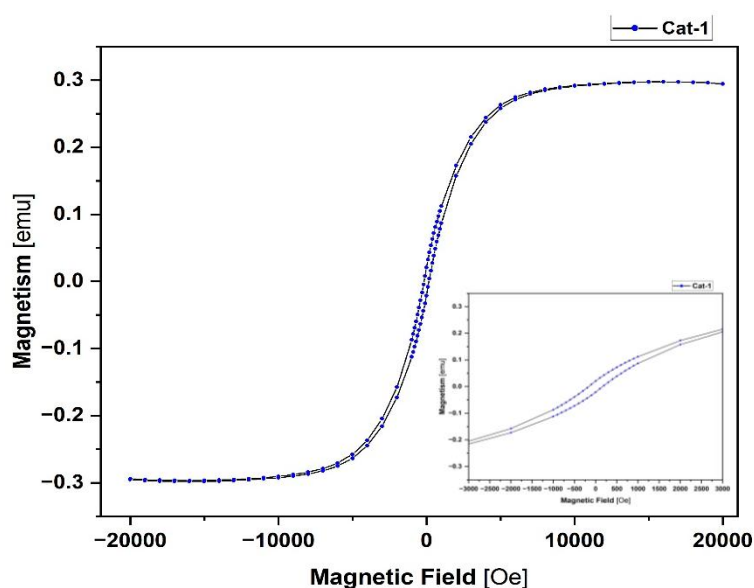

**Figure S8.** VSM analysis of **Cat-1**

The magnetic property of **Cat-1** was evaluated using a vibrating sample magnetometer (VSM) at room temperature. **Figure S8** shows the magnetization (M) versus applied magnetic field (H) plot recorded in the field range of -20,000 to +20,000 Oe. The magnetization curve exhibits a typical S-shaped hysteresis loop with saturation at higher applied fields. The saturation magnetization (Ms) was observed at  $\pm 0.30$  emu, while the remanent magnetization (Mr) and coercivity (Hc) were negligible. These features indicate that **Cat-1** exhibits soft ferromagnetic behavior, with magnetization increasing rapidly with applied field and reaching a stable saturation value, with little remanence or coercivity.

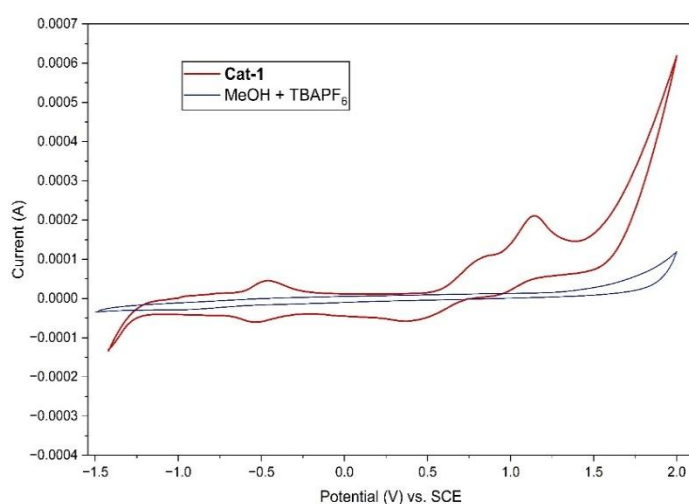

**Figure S9.** Cyclic voltammogram of **Cat-1** (2mM) in methanol using Glassy Carbon, platinum wire, and Saturated Calomel Electrode as working, counter, and reference electrode, respectively. (Voltammograms recorded at 100 mV/s in 0.1 M TBAPF<sub>6</sub>).

Cyclic voltammetry of **Cat-1** was recorded in methanol with 0.1 M TBAPF<sub>6</sub> (vs. SCE) using Gamry Interface 1010E potentiostat at a scan rate of 100 mV/s. Scanning anodically from 0 V reveals an irreversible oxidation peak at +1.14 V, attributed to the Co(II)/Co(III) oxidation. A weak reduction peak is observed at +0.36 V on the reverse sweep, with a significant peak separation of 780.1 mV, indicating electrochemical irreversibility of this oxidation.

In the cathodic region, a reduction peak at −0.54 V appears, followed by an anodic peak at −0.46 V during the reverse scan, giving a peak separation of ~80 mV, which is slightly larger than the ideal 57 mV expected for a fully Nernstian one-electron process. This behaviour suggests a near-reversible or quasi-reversible redox event, which is likely associated with the Co(II)/Co(I) redox couple.

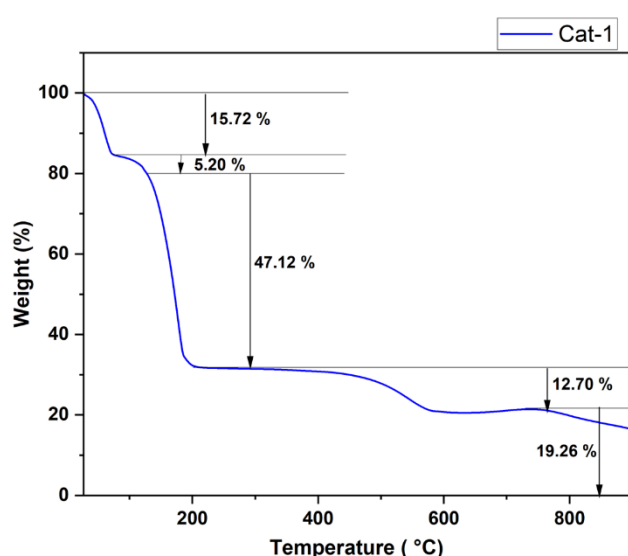

**Figure S10.** DT-TGA graph of **Cat-1**

The thermal stability and composition of **Cat-1** (C<sub>30</sub>H<sub>36</sub>Co<sub>2</sub>O<sub>6</sub>; MW = 610.12 g/mol) were examined by thermogravimetric analysis (TGA) at variable temperatures ranging from 30 °C to 1000 °C (Figure S10). The TGA profile exhibits four distinct weight-loss steps, consistent with the sequential elimination of coordinated ligands and the decomposition of the organic framework. The initial weight loss of **15.72%** (calcd 15.75%) at < 110 °C corresponds to the loss of three coordinated methanol, followed by a second step of **5.20%** (calcd 5.34%) between 110–160 °C, attributed to the loss of the fourth coordinated methanol. The third major decomposition event occurs between 160–330 °C and 450–750 °C, with a combined weight loss of 59.93% (calcd 60.41%), assigned to the elimination of two fluorene and two -OH ligands. The remaining residue of **19.26%** (calcd 19.16%) above 750 °C is attributed to the formation of cobalt residue species in close agreement with the theoretical cobalt content of the complex. Overall, the DT-TGA data strongly supported the proposed structure of the cobalt(II) catalyst, as shown in Cat-1 or IN1, comprising two cobalt centres bridged by two hydroxide ligands, with each Co centre coordinating one fluorenyl and two methanol molecules.

### Interpretation of the DT-TGA graph

| S.No. | Ligands                       | Weight loss % |                          | Temperature (°C)    |
|-------|-------------------------------|---------------|--------------------------|---------------------|
|       |                               | Calculated    | Experimental             |                     |
| 1.    | Three methanol                | <b>15.75</b>  | 15.72                    | 0 - 110             |
| 2.    | One methanol                  | <b>5.34</b>   | 5.20                     | 110-160             |
| 3.    | Hydroxyl and fluorene ligands | <b>60.41</b>  | 47.12 + 12.70<br>= 59.82 | 160 -330<br>450-750 |
| 4.    | Cobalt residues               | <b>19.16</b>  | 19.26                    | 750 -900            |

### 4. General Procedure for C-H alkylation reaction:

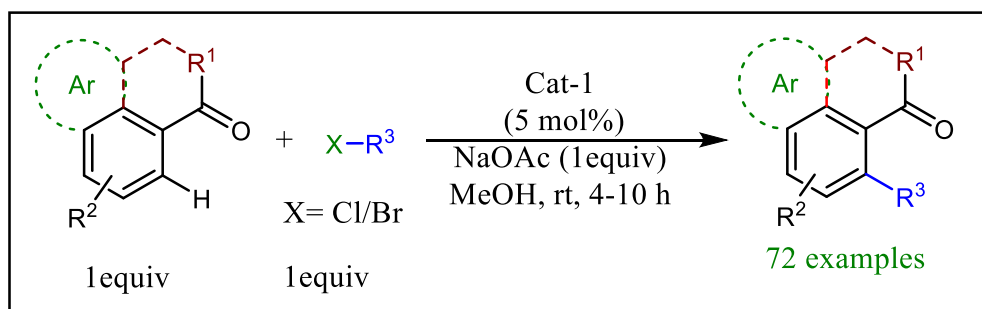

In a round-bottom flask/reaction tube, sodium acetate (2.0 mmol, 0.164 g) was placed and dissolved in 5 mL of methanol, followed by the addition of **Cat-1** (48 mg, 5 mol%) (**Figure S9a**). Then, the corresponding aryl ketone (2 mmol) and an alkyl halide (2 mmol) were added to the above solution. The resulting reaction mixture was stirred for 4-10 hours at room temperature to get the C-H alkylated products in the absence of any dry/inert atmosphere. The progress of the reaction was monitored using thin-layer chromatography and 2,4-dinitrophenylhydrazine (2,4-DNP) as the staining agent. The reaction yields were determined by GC-MS. After the reaction was complete, the solvent was removed under vacuum, and the product was directly adsorbed onto silica for column chromatography. The crude product was then purified by column chromatography, using a mixture of hexanes and EtOAc as the eluent. **Note:** For light-sensitive alkyl halides, the reaction flask was covered with black tape to avoid contact with light to get the desired C-H alkylated products (**3x-3aa**, **3ae-3ap**, **3av-3ay**, and **3bo-3bt**) (**Figure S9b**).



## 5.2. Competitive reaction between acetophenone and acetophenone-d<sub>5</sub> with *tert*-butyl chloride

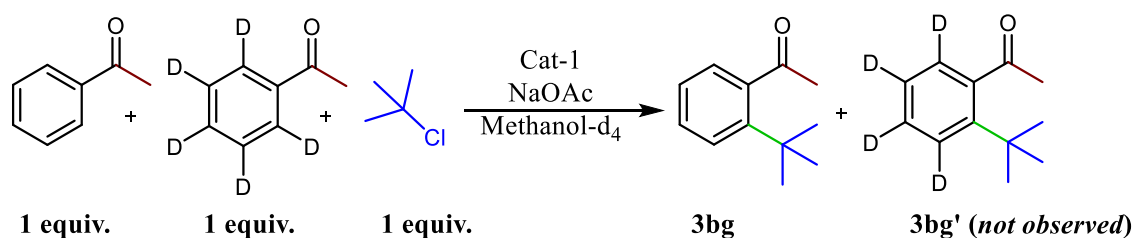

To probe whether C-H bond metathesis is the rate-determining step (RDS) in the cobalt-catalysed alkylation reaction, a competitive kinetic isotope effect (KIE) experiment was conducted. Sodium acetate (20.50 mg, 0.25 mmol) was dissolved in methanol-d<sub>4</sub> (2 mL) in a reaction tube, followed by the addition of **Cat-1** (5 mol%). Subsequently, acetophenone (30.00 mg, 0.25 mmol), acetophenone-d<sub>5</sub> (31.29 mg, 0.25 mmol), and *tert*-butyl chloride (23.14 mg, 0.25 mmol) were added. The mixture was stirred at room temperature, and the reaction progress was monitored by GC-MS at hourly intervals. After seven h, the only single alkylated product, **3bg**, was obtained in 97% GC yield. The crude reaction mixture was further analysed by <sup>1</sup>H and <sup>13</sup>C NMR spectroscopy.

GC-MS and NMR analyses revealed that alkylation occurred exclusively with acetophenone, while no significant alkylated product derived from acetophenone-d<sub>5</sub> was detected. Moreover, no evidence of H/D scrambling was observed. These results show that the primary kinetic isotope effect, indicating that C-H bond cleavage is involved in the transition state of the RDS. The lack of reactivity of acetophenone-d<sub>5</sub> suggests a substantial rate difference ( $k_H/k_D \gg 1$ ), which is characteristic of a primary KIE. The absence of H/D exchange further supports the irreversibility of the C-H bond metathesis step.

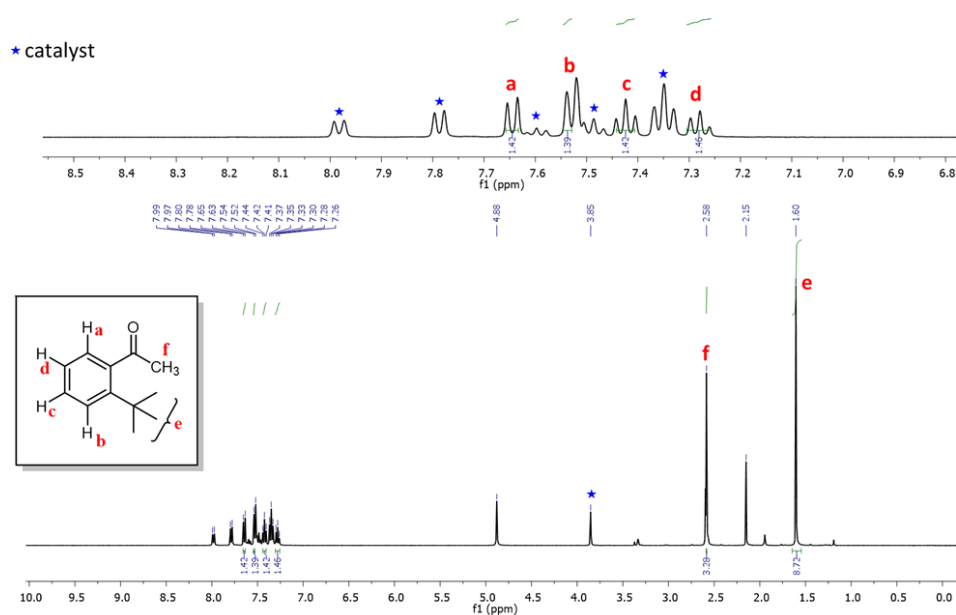

**Figure S12.** <sup>1</sup>H NMR spectrum of crude reaction mixture of acetophenone, acetophenone-d<sub>5</sub>, and *tert*-butylchloride.



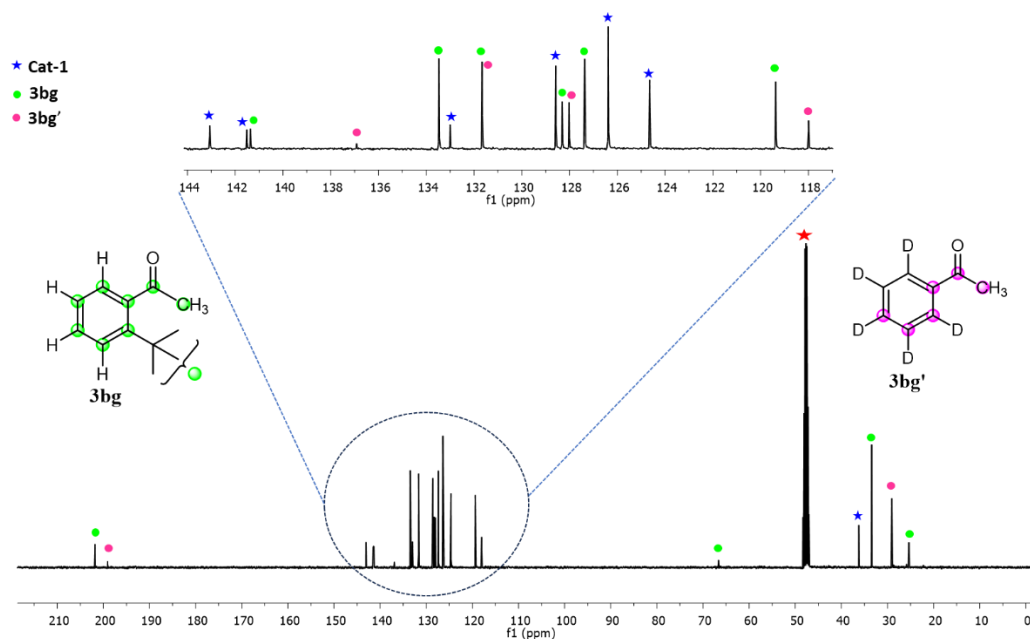

**Figure S13.**  $^{13}\text{C}$  NMR spectrum of the crude reaction mixture of acetophenone, acetophenone- $\text{d}_5$ , and *tert*-butylchloride.

**5.3. Kinetic isotope effect:** To study KIE the following reactions were performed.

**Set-I (with acetophenone):** In a reaction tube, sodium acetate (0.25 mmol, 20 mg) was placed and dissolved in 1.5 mL of methanol, followed by the addition of **Cat-1** (6.5 mg, 5 mol%). Acetophenone (0.25 mmol, 30 mg) and *tert*-butyl chloride (0.25 mmol, 25 mg) were added to the reaction mixture. The resulting mixture was stirred at room temperature. GC-MS monitored the reaction progress at hourly intervals. After 7 h, the product **3bg** was obtained with 97.71% GC yield.

d) Kinetic isotope effect

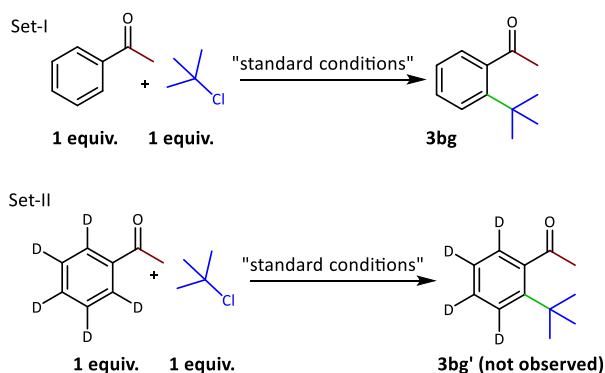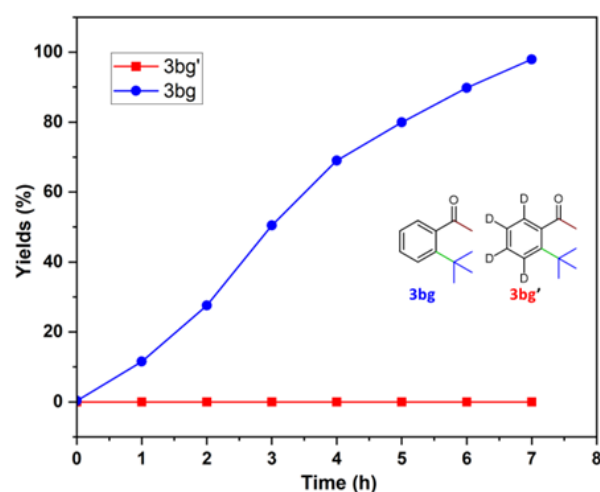

**Set-II (with acetophenone- $\text{d}_5$ ):** In a reaction tube, sodium acetate (0.25 mmol, 20 mg) was placed and dissolved in 1.5 mL of methanol, followed by the addition of **Cat-1** (6.5 mg, 5 mol%). Acetophenone- $\text{d}_5$  (0.25 mmol, 31 mg) and *tert*-butyl chloride (0.25 mmol, 25 mg) were

added to the reaction mixture. The resulting mixture was stirred at room temperature. The progress of the reaction was monitored by using GC-MS at hourly intervals. However, no expected **3bg** product was observed over the monitored period.

### $^1\text{H}$ and $^{13}\text{C}$ NMR spectrum of IN3

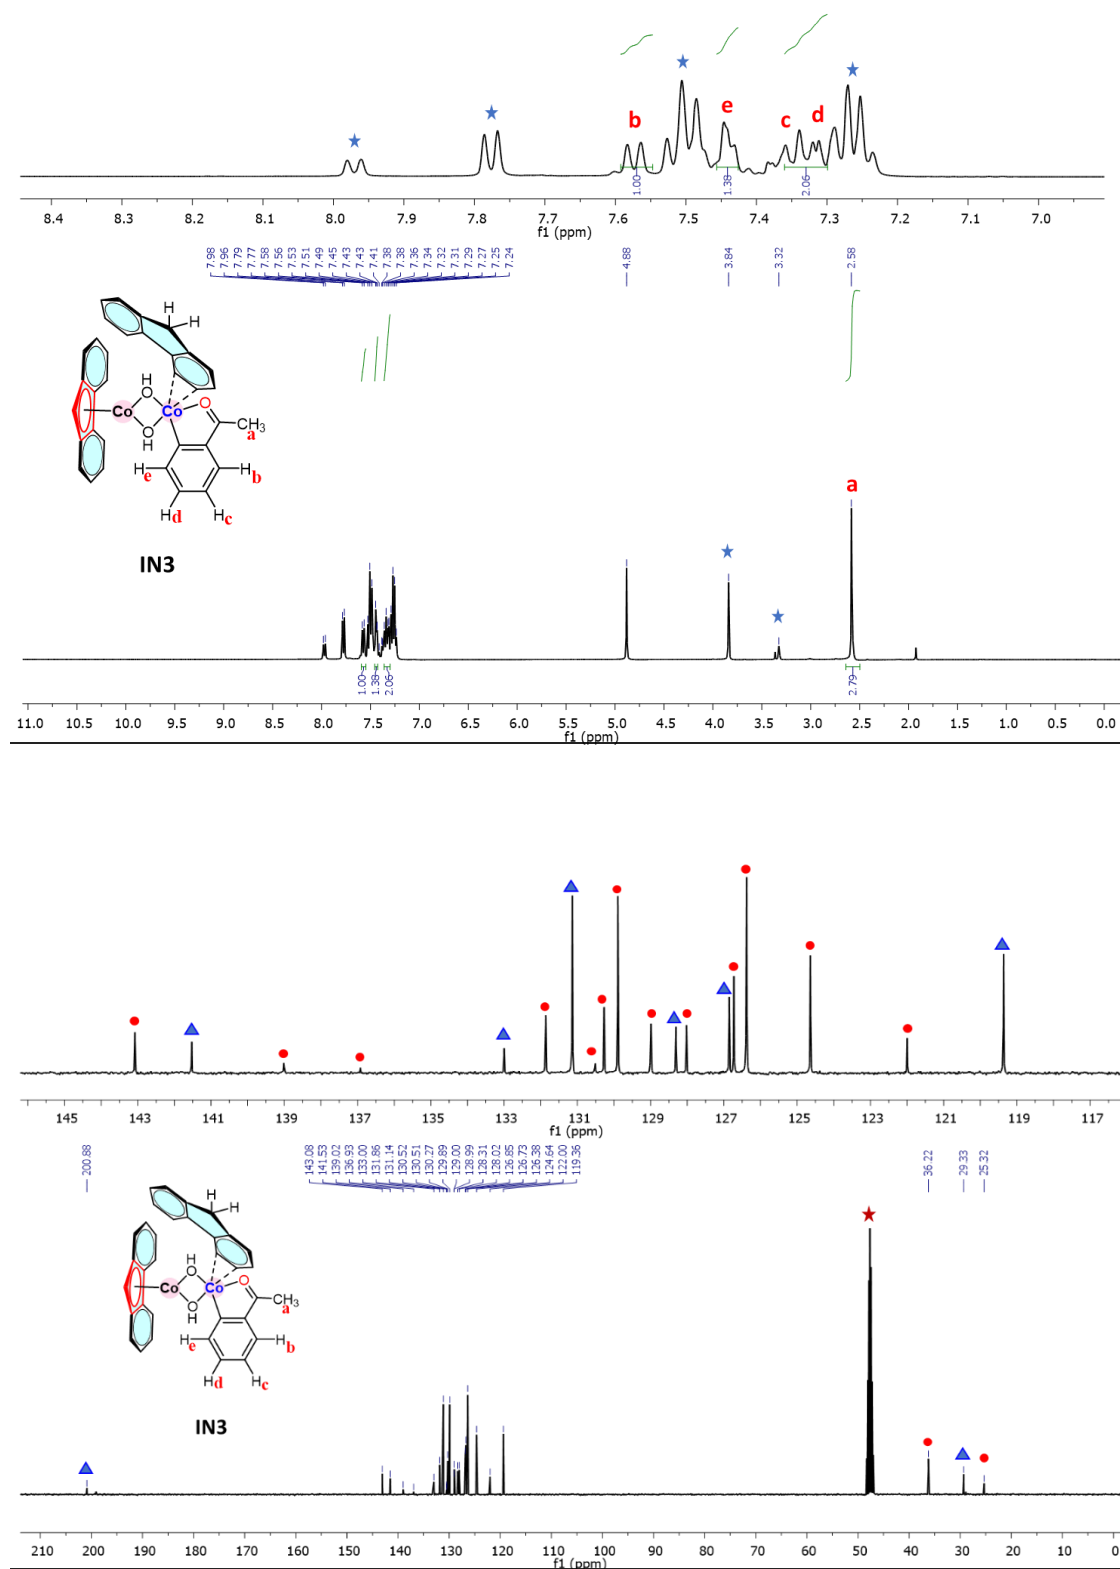

## 6. Experimental Details and Spectroscopic Data of 3a-3bq

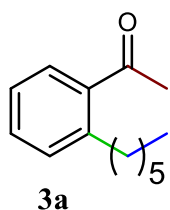

**1-(2-hexylphenyl)ethan-1-one (3a):** General procedure as stated above was followed for the synthesis of **3a** from acetophenone (0.240 g, 2 mmol, 1 equiv.) and 1-bromohexane (2 mmol, 0.330 g, 1 equiv.). The product was purified by column chromatography (silica gel, gradient elution: 2.5% to 5% ethyl acetate in hexanes), and a light-yellow oil of 1-(2-hexylphenyl)ethan-1-one (0.39g, 95%) was obtained with a boiling point of 189 °C.  $R_f$  = 0.48; TLC in 2.5% ethyl acetate in hexane with three runs and stained in 2,4-DNP.  **$^1\text{H}$  NMR** (400 MHz,  $\text{CDCl}_3$ ):  $\delta$  7.62 (d,  $J$  = 7.9 Hz, 1H), 7.48 (dd,  $J$  = 7.6, 1.6 Hz, 1H), 7.38 (t,  $J$  = 7.5 Hz, 1H), 7.33 – 7.27 (m, 1H), 3.42 (t,  $J$  = 6.9 Hz, 2H), 2.64 (s, 3H), 1.90 – 1.80 (m, 2H), 1.49 – 1.39 (m, 2H), 1.34 – 1.26 (m, 4H), 0.91 (t,  $J$  = 6.8 Hz, 3H).  **$^{13}\text{C}$  NMR** (101 MHz,  $\text{CDCl}_3$ ):  $\delta$  201.3, 141.3, 133.5, 131.7, 128.5, 127.6, 118.7, 34.1, 33.0, 30.95, 30.3, 27.8, 22.5, 13.8. **HRMS** (ESI-TOF) calculated for  $\text{C}_{14}\text{H}_{20}\text{O}_3$   $[\text{M}+\text{H}]^+$  205.1514, found 205.1519.

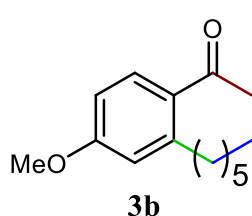

**1-(2-hexyl-4-methoxyphenyl)ethan-1-one (3b):** General procedure as stated above was followed for the synthesis of **3b** from 4-methoxyacetophenone (0.300 g, 2 mmol, 1 equiv.) and 1-bromohexane (2 mmol, 0.330 g, 1 equiv.). The product was purified by column chromatography (silica gel, gradient elution with 2.5% and 5% ethyl acetate in hexanes), yielding a white solid of 1-(2-hexyl-4-methoxyphenyl)ethan-1-one (0.44g, 95%), with a melting point of 132 °C.  $R_f$  = 0.36; TLC in 2.5% ethyl acetate in hexane with three runs and stained in 2,4-DNP.  **$^1\text{H}$  NMR** (400 MHz,  $\text{CDCl}_3$ ):  $\delta$  7.55 (d,  $J$  = 8.3 Hz, 1H), 6.99 – 6.98 (dd,  $J$  = 7.2, 2.4 Hz, 1H), 6.14 (s, 1H), 3.96 (s, 3H), 3.41 (t,  $J$  = 6.9 Hz, 2H), 2.57 (s, 3H), 2.02-1.82 (m, 2H), 1.44 (dt,  $J$  = 14.9, 7.5 Hz, 2H), 1.39-1.25 (m, 4H), 0.91 (t,  $J$  = 6.97 Hz, 3H).  **$^{13}\text{C}$  NMR** (101 MHz,  $\text{CDCl}_3$ ):  $\delta$  196.6, 150.4, 146.6, 130.2, 123.9, 113.7, 109.7, 56.0, 33.9, 32.8, 30.9, 27.8, 26.1, 22.4, 13.9. **HRMS** (ESI-TOF) calculated for  $\text{C}_{15}\text{H}_{22}\text{O}_2$   $[\text{M}]^+$  235.1614, found 235.1604.

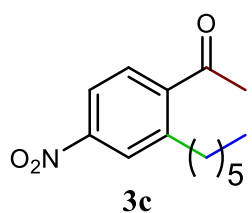

**1-(2-hexyl-4-nitrophenyl) ethan-1-one (3c):** General procedure as stated above was followed for the synthesis of **3c** from 4-nitroacetophenone (0.330g, 2 mmol, 1 equiv.) and 1-bromohexane (2 mmol, 0.330 g, 1 equiv.). The product was purified by column chromatography (silica gel, gradient elution: 2.5%, 5%, 10% ethyl acetate in hexanes), yielding a yellow solid of 1-(2-hexyl-4-nitrophenyl)ethan-1-one. (0.45g, 92%) with a melting point of 128 °C.  $R_f$  = 0.45; TLC in 2.5% ethyl acetate in hexane with three runs and stained with 2,4-DNP.  **$^1\text{H}$  NMR** (400 MHz,  $\text{CDCl}_3$ ):  $\delta$  8.00 (d,  $J$  = 2.1 Hz, 1H), 7.50 (dd,  $J$  = 8.2, 2.2 Hz, 1H), 7.32 (d,  $J$  = 8.2 Hz, 1H), 3.43 (t,  $J$  = 6.9 Hz, 2H), 2.59 (s, 3H), 2.02 – 1.75 (m, 2H), 1.45 (m, 2H), 1.37 – 1.26 (m, 4H), 0.91 (t,  $J$  = 6.9 Hz, 3H).  **$^{13}\text{C}$  NMR** (101 MHz,  $\text{CDCl}_3$ ):  $\delta$  196.7, 150.4, 146.6, 130.2, 124.0, 113.7, 109.7, 56.0, 34.0, 32.8, 30.9, 27.8, 22.4, 13.9. **HRMS** (ESI-TOF) calculated for  $\text{C}_{14}\text{H}_{19}\text{NO}_3$   $[\text{M}+\text{H}]^+$  250.1438, found 250.1438.

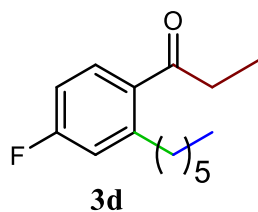

**1-(4-fluoro-2-hexylphenyl)propan-1-one (3d):** General procedure as stated above was followed for the synthesis of **3d** from 4-fluoropropiophenone (0.304 g, 2 mmol, 1 equiv.) and 1-bromohexane (2 mmol, 0.330 g, 1 equiv.). The product was purified by column chromatography (silica gel, gradient elution: 2.5%, 5%, 10% ethyl acetate in hexanes), yielding an oily liquid of 1-(4-fluoro-2-hexylphenyl)propan-1-one (0.38g, 87%) with a boiling point of 218 °C.  $R_f$  = 0.30; TLC in 2.5% ethyl acetate in hexane with three runs and stained with 2,4-DNP.  $^1\text{H NMR}$  (400 MHz,  $\text{CDCl}_3$ ):  $\delta$  8.03 – 8.01 (m, 1H), 8.00 – 7.97 (m, 1H), 7.17 – 7.08 (m, 1H), 3.42 (t,  $J$  = 7.2 Hz, 2H), 2.99 (q,  $J$  = 7.2 Hz, 2H), 1.92 – 1.80 (m, 2H), 1.49 – 1.38 (m, 2H), 1.37 – 1.27 (m, 4H), 1.23 (t,  $J$  = 7.2 Hz, 3H), 0.91 (t,  $J$  = 6.9 Hz, 3H).  $^{13}\text{C NMR}$  (101 MHz,  $\text{CDCl}_3$ ):  $\delta$  199.1, 165.61 (d,  $J_{\text{C-F}}$  = 254.2 Hz), 164.3, 133.3 (d,  $J_{\text{C-F}}$  = 3.0 Hz), 130.5 (d,  $J_{\text{C-F}}$  = 9.2 Hz), 115.5 (d,  $J_{\text{C-F}}$  = 21.8 Hz), 34.0, 32.8, 31.7, 30.9, 27.8, 22.4, 13.9, 8.1.  $^{19}\text{F NMR}$  (377 MHz,  $\text{CDCl}_3$ )  $\delta$  -104.88 – -106.39 (m). **HRMS** (ESI-TOF) calculated for  $\text{C}_{15}\text{H}_{19}\text{FO}$   $[\text{M}+\text{NH}_4]^+$  254.1915, found 254.1909.

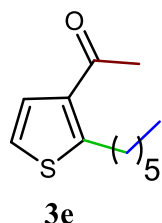

**1-(2-hexylthiophen-3-yl) ethan-1-one (3e):** General procedure as stated above was followed for the synthesis of **3e** from 3-acetylthiophene (0.252 g, 2 mmol, 1 equiv.) and 1-bromohexane (2mmol, 0.330 g, 1 equiv.). The product was purified by column chromatography (silica gel, gradient elution: 2.5%, 5%, 10% ethyl acetate in hexanes), yielding a yellow liquid of 1-(2-hexylthiophen-3-yl)ethan-1-one (0.36g, 88%) with a boiling point of 198 °C.  $R_f$  = 0.30; TLC in 2.5% ethyl acetate in hexane with three runs and stained with 2,4-DNP.  $^1\text{H NMR}$  (400 MHz,  $\text{CDCl}_3$ ):  $\delta$  7.01 (d,  $J$  = 5.6 Hz, 1H), 6.79 (d,  $J$  = 5.6 Hz, 1H), 2.63 – 2.44 (m, 2H), 2.14 (s, 3H), 1.53 (m, 2H), 1.28 (m, 6H), 0.87 (m, 3H).  $^{13}\text{C NMR}$  (101 MHz,  $\text{CDCl}_3$ ):  $\delta$  206.6, 139.1, 127.8, 121.9, 31.5, 30.7, 29.5, 28.8, 27.8, 22.5, 14.0. **HRMS** (ESI-TOF) calculated for  $\text{C}_{12}\text{H}_{18}\text{OS}$   $[\text{M}+\text{Na}]^+$  221.0971, found 221.0962.

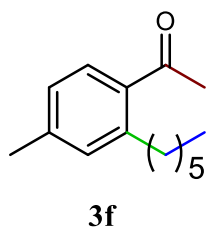

**1-(2-hexyl-4-methylphenyl)ethan-1-one (3f):** General procedure as stated above was followed for the synthesis of **3f** from 4-methylacetophenone (0.268 g, 2 mmol, 1 equiv.) and 1-bromohexane (2 mmol, 0.330 g, 1 equiv.). The product was purified by column chromatography (silica gel, gradient elution with 2.5% and 5% ethyl acetate in hexanes). and pale-yellow oil of 1-(2-hexyl-4-methylphenyl)ethan-1-one was obtained (0.41g, 93%) with boiling of 232 °C.  $R_f$  = 0.36; TLC in 2.5% ethyl acetate in hexane with three runs and stained with 2,4-DNP.  $^1\text{H NMR}$  (400 MHz,  $\text{CDCl}_3$ ):  $\delta$  7.19 (d,  $J$  = 8.3 Hz, 1H), 7.12 (d,  $J$  = 8.3 Hz, 1H), 6.98 (d,  $J$  = 2.7 Hz, 1H), 3.44 (t,  $J$  = 6.9 Hz, 1H), 2.35 (s, 3H), 2.32 (s, 3H), 1.96 – 1.82 (m, 2H), 1.47 (d,  $J$  = 6.7 Hz, 2H), 1.38 – 1.30 (m, 4H), 0.93 (t,  $J$  = 6.9 Hz, 3H).  $^{13}\text{C NMR}$  (101 MHz,  $\text{CDCl}_3$ ):  $\delta$  203.4, 136.9, 133.9, 132.7, 130.6, 129.5, 127.3, 34.0, 32.8, 30.9, 27.8, 22.5, 20.6, 19.5, 13.9. **HRMS** (ESI-TOF) calculated for  $\text{C}_{15}\text{H}_{22}\text{O}$   $[\text{M}+\text{H}]^+$  219.1743, found 219.1741.

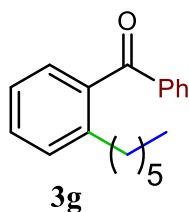

**(2-hexylphenyl) (phenyl)methanone (3g):** General procedure as stated above was followed for the synthesis of **3g** from benzophenone (0.364 g, 2 mmol, 1 equiv.) and 1-bromohexane (2 mmol, 0.330 g, 1 equiv.). The product was purified by column chromatography (silica gel, gradient elution: 2.5%, 5%, 10% ethyl acetate in hexanes), and a white solid of (2-hexylphenyl)(phenyl)methanone (0.50g, 93%) was obtained, with a melting point of 120 °C.  $R_f$  = 0.52; TLC in 2.5% ethyl acetate in hexane with three runs and stained with 2,4-DNP.  $^1\text{H}$  NMR (400 MHz,  $\text{CDCl}_3$ ):  $\delta$  7.82 – 7.77 (m, 2H), 7.73 – 7.68 (m, 2H), 7.67 – 7.61 (m, 3H), 7.51 (t,  $J$  = 7.6 Hz, 2H), 3.43 (t,  $J$  = 6.9 Hz, 2H), 1.93 – 1.80 (m, 2H), 1.45 (dt,  $J$  = 14.7, 7.4 Hz, 2H), 1.39 – 1.26 (m, 4H), 0.92 (t,  $J$  = 6.8 Hz, 3H).  $^{13}\text{C}$  NMR (101 MHz,  $\text{CDCl}_3$ ):  $\delta$  195.6, 137.1, 136.3, 132.6, 131.6, 131.5, 129.9, 128.4, 127.5, 34.0, 32.8, 30.9, 27.8, 22.4, 13.9. HRMS (ESI-TOF) calculated for  $\text{C}_{18}\text{H}_{18}\text{O}$   $[\text{M}+\text{H}]^+$  271.1693, found 271.1712.

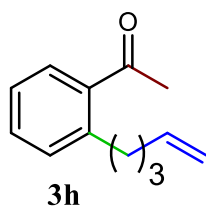

**1-(2-(pent-4-en-1-yl)phenyl) ethan-1-one (3h):** General procedure as stated above was followed for the synthesis of **3h** from acetophenone (0.240 g, 2 mmol, 1 equiv.) and 5-bromo-1-pentene (2 mmol, 0.286 g, 1 equiv.). The product was purified by column chromatography (silica gel, gradient elution: 2.5% to 5% ethyl acetate in hexanes), and an oily liquid of 1-(2-(pent-4-en-1-yl)phenyl)ethan-1-one (0.32g, 85%) was obtained, boiling at 245 °C.  $R_f$  = 0.43; TLC in 2.5% ethyl acetate in hexane with three runs and stained with 2,4-DNP.  $^1\text{H}$  NMR (400 MHz,  $\text{CDCl}_3$ ):  $\delta$  7.62 (dd,  $J$  = 7.9, 0.9 Hz, 1H), 7.47 (dd,  $J$  = 7.6, 1.8 Hz, 1H), 7.37 (td,  $J$  = 7.5, 1.1 Hz, 1H), 7.30 (td,  $J$  = 7.7, 2.1 Hz, 1H), 5.82 – 5.70 (m, 1H), 5.16 – 4.98 (m, 2H), 3.49 – 3.38 (m, 2H), 2.64 (s, 3H), 2.28 – 2.12 (m, 2H), 2.01 – 1.88 (m, 2H).  $^{13}\text{C}$  NMR (101 MHz,  $\text{CDCl}_3$ ):  $\delta$  201.2, 141.4, 136.7, 133.8, 131.7, 128.9, 127.4, 118.8, 115.8, 33.1, 32.0, 31.7, 30.3. HRMS (ESI-TOF) calculated for  $\text{C}_{13}\text{H}_{16}\text{O}$   $[\text{M}+\text{H}]^+$  189.1274, found 189.1278.

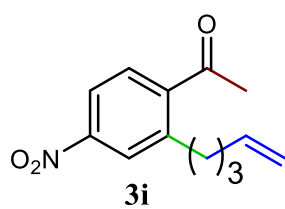

**1-(4-nitro-2-(pent-4-en-1-yl)phenyl) ethan-1-one (3i):** General procedure as stated above was followed for the synthesis of **3i** from 4-nitroacetophenone (0.330 g, 2 mmol, 1 equiv.) and 5-bromo-1-pentene (2 mmol, 0.298 g, 1 equiv.). The product was purified by column chromatography (silica gel, gradient elution 5%, 10%, 15% ethyl acetate in hexanes) and a yellow solid, 1-(4-nitro-2-(pent-4-en-1-yl)phenyl)ethan-1-one, was obtained (0.41g, 86%) with a melting point of 161 °C.  $R_f$  = 0.26; TLC in 5% ethyl acetate in hexane with three runs and stained with 2,4-DNP.  $^1\text{H}$  NMR (400 MHz,  $\text{CDCl}_3$ ):  $\delta$  8.30 (d,  $J$  = 2.1 Hz, 1H), 8.10 (dd,  $J$  = 8.2, 2.2 Hz, 1H), 7.28 (d,  $J$  = 8.2 Hz, 1H), 5.82 – 5.70 (m, 1H), 5.16 – 4.98 (m, 2H), 3.42 (t,  $J$  = 6.9 Hz, 2H), 2.69 (s, 3H), 1.95 – 1.78 (m, 2H), 1.50 – 1.39 (m, 2H).  $^{13}\text{C}$  NMR (101 MHz,  $\text{CDCl}_3$ ):  $\delta$  196.7, 150.4, 141.6, 136.2, 129.0, 127.6, 115.7, 109.7, 56.0, 34.0, 32.8, 30.9, 27.8, 22.4, 13.9. HRMS (ESI-TOF) calculated for  $\text{C}_{13}\text{H}_{15}\text{NO}_3$   $[\text{M}+\text{H}]^+$  234.1125, found 234.1126.

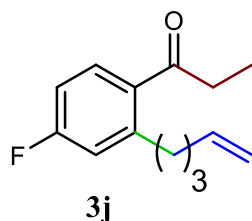

**1-(4-fluoro-2-(pent-4-en-1-yl)phenyl)propan-1-one (3j):** General procedure as stated above was followed for the synthesis of **3j** from 4-fluoropropiophenone (0.304 g, 2 mmol, 1 equiv.) and 5-bromo-1-pentene (2 mmol, 0.298 g, 1 equiv.). The product was purified by column chromatography (silica gel, gradient elution: 2.5% to 5% ethyl acetate in hexanes), and an oily liquid, 1-(4-fluoro-2-(pent-4-en-1-yl)phenyl)propan-1-one (0.40g, 90%), was obtained with a boiling point of 245 °C.  $R_f$  = 0.43; TLC in 2.5% ethyl acetate in hexane with three runs and stained with 2,4-DNP.  $^1\text{H NMR}$  (400 MHz,  $\text{CDCl}_3$ ):  $\delta$  8.05 – 8.01 (m, 1H), 8.01 – 7.96 (m, 1H), 7.15 (t,  $J$  = 8.6 Hz, 1H), 5.84 – 5.73 (m, 1H), 5.14 – 4.98 (m, 2H), 3.44 (t,  $J$  = 6.7 Hz, 2H), 3.00 (q,  $J$  = 7.2 Hz, 2H), 2.23 (q,  $J$  = 7.0 Hz, 2H), 2.05 – 1.90 (m, 2H), 1.24 (t,  $J$  = 7.2 Hz, 3H).  $^{13}\text{C NMR}$  (101 MHz,  $\text{CDCl}_3$ ):  $\delta$  199.0, 165.6 (d,  $J_{\text{C-F}}$  = 254.2 Hz), 164.0, 136.9, 133.3 (d,  $J_{\text{C-F}}$  = 3.1 Hz), 130.5 (d,  $J_{\text{C-F}}$  = 9.2 Hz), 115.8 (d,  $J_{\text{C-F}}$  = 16.1 Hz), 115.5, 33.1, 32.0, 31.7, 31.7, 8.21.  $^{19}\text{F NMR}$  (377 MHz,  $\text{CDCl}_3$ )  $\delta$  -105.48 – -105.99 (m). **HRMS** (ESI-TOF) calculated for  $\text{C}_{14}\text{H}_{17}\text{FO}$   $[\text{M}+\text{Na}]^+$  204.0921, found 204.0911.

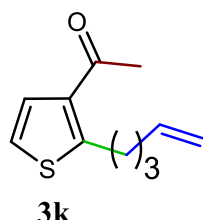

**1-(2-(pent-4-en-1-yl)thiophen-3-yl)ethan-1-one (3k):** General procedure as stated above was followed for the synthesis of **3k** from 1-(thiophen-3-yl)ethan-1-one (0.252 g, 2 mmol, 1 equiv.) and 5-bromo-1-pentene (2 mmol, 0.298 g). The product was purified by column chromatography (silica gel, gradient elution: 2.5% to 5% ethyl acetate in hexanes), and the oil liquid of 1-(2-(pent-4-en-1-yl)thiophen-3-yl)ethan-1-one was obtained (0.35g, 88%) with a boiling point of 215 °C.  $R_f$  = 0.43; TLC in 2.5% ethyl acetate in hexane with three runs and stained with 2,4-DNP.  $^1\text{H NMR}$  (400 MHz,  $\text{CDCl}_3$ ):  $\delta$  7.59 (d,  $J$  = 3.6 Hz, 1H), 7.26 (d,  $J$  = 3.6 Hz, 1H), 5.78 (ddt,  $J$  = 17.0, 10.2, 6.7 Hz, 1H), 5.18 – 4.95 (m, 2H), 3.47 – 3.38 (m, 2H), 2.22 (d,  $J$  = 7.0 Hz, 2H), 2.17 (s, 3H), 2.00 – 1.91 (m, 2H).  $^{13}\text{C NMR}$  (101 MHz,  $\text{CDCl}_3$ ):  $\delta$  206.9, 152.0, 141.6, 136.7, 121.1, 115.8, 33.1, 32.0, 31.7, 30.9. **HRMS** (ESI-TOF) calculated for  $\text{C}_{15}\text{H}_{23}\text{O}_3$   $[\text{M}+\text{Na}]^+$ : 273.1284; found: 273.1289.

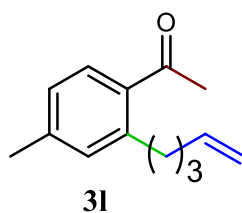

**1-(4-methyl-2-(pent-4-en-1-yl)phenyl)ethan-1-one (3l):** General procedure as stated above was followed for the synthesis of **3l** from 4-methylacetophenone (0.268 g, 2 mmol, 1 equiv.) and 5-bromo-1-pentene (2 mmol, 0.298 g, 1 equiv.). The product was purified by column chromatography (silica gel, gradient elution: 2.5% to 5% ethyl acetate in hexanes), yielding an oily liquid of 1-(4-methyl-2-(pent-4-en-1-yl)phenyl)ethan-1-one (0.38g, 94%) with a boiling point of 235 °C.  $R_f$  = 0.56; TLC in 2.5% ethyl acetate in hexane with three runs and stained with 2,4-DNP.  $^1\text{H NMR}$  (400 MHz,  $\text{CDCl}_3$ ):  $\delta$  7.19 (d,  $J$  = 8.3 Hz, 1H), 7.12 (d,  $J$  = 8.3 Hz, 1H), 6.98 (d,  $J$  = 2.7 Hz, 1H), 5.82 – 5.70 (m, 1H), 5.16 – 4.98 (m, 2H), 3.49 – 3.38 (m, 2H), 2.35 (s, 3H), 2.32 (s, 3H), 2.28 – 2.12 (m, 2H), 2.01 – 1.88 (m, 2H).  $^{13}\text{C NMR}$  (101 MHz,  $\text{CDCl}_3$ ):  $\delta$  200.4, 136.9, 136.7, 133.9, 132.7, 130.6, 129.5, 127.3, 115.9, 33.1, 32.0, 31.7, 20.6, 19.5. **HRMS** (ESI-TOF) calculated for  $\text{C}_{14}\text{H}_{18}\text{O}$   $[\text{M}+\text{Na}]^+$  225.1252, found 225.1250.

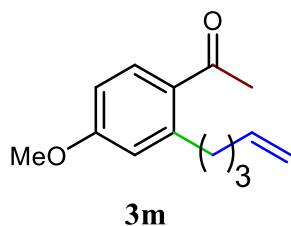

**1-(4-methoxy-2-(pent-4-en-1-yl)phenyl)ethan-1-one (3m):**

General procedure as stated above was followed for the synthesis of **3m** from 4-methoxyacetophenone (0.300 g, 2 mmol, 1 equiv.) and 5-bromo-1-pentene (2 mmol, 0.298 g, 1 equiv.). The product was purified by column chromatography (silica gel, gradient elution: 2.5% to 5% ethyl acetate in hexanes), yielding a white solid of 1-(4-methoxy-2-(pent-4-en-1-yl)phenyl)ethan-1-one (0.40g, 92%), with a melting point of 155 °C.  $R_f$  = 0.56; TLC in 2.5% ethyl acetate in hexane with three runs and stained with 2,4-DNP.  $^1\text{H NMR}$  (400 MHz,  $\text{CDCl}_3$ ):  $\delta$  7.55 (d,  $J$  = 8.3 Hz, 1H), 6.99 – 6.98 (dd,  $J$  = 7.2, 2.4 Hz, 1H), 6.14 (s, 1H), 5.82 – 5.70 (m, 1H), 5.16 – 4.98 (m, 2H), 3.49 – 3.38 (m, 2H), 3.96 (s, 3H), 2.64 (s, 3H), 2.28 – 2.12 (m, 2H), 2.01 – 1.88 (m, 2H).  $^{13}\text{C NMR}$  (101 MHz,  $\text{CDCl}_3$ ): 196.7, 150.4, 146.6, 136.7, 130.2, 124.0, 115.8, 113.7, 109.7, 56.0, 33.1, 32.0, 31.7, 26.1. **HRMS** (ESI-TOF) calculated for  $\text{C}_{14}\text{H}_{18}\text{O}_2$   $[\text{M}+\text{H}]^+$  219.1380, found 219.1399.

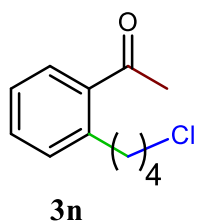

**1-(2-(4-chlorobutyl)phenyl)ethan-1-one (3n):**

General procedure as stated above was followed for the synthesis of **3n** from acetophenone (0.240 g, 2 mmol, 1 equiv.) and 1-chloro-4-dibromobutane (2 mmol, 0.342 g, 1 equiv.). The product was purified by column chromatography (silica gel, gradient elution with 2.5% and 5% ethyl acetate in hexanes), yielding a yellow liquid, 1-(2-(4-chlorobutyl)phenyl)ethan-1-one (0.48g, 94%), with a boiling point of 218 °C.  $R_f$  = 0.39; TLC in 2.5% ethyl acetate in hexane with three runs and stained with 2,4-DNP.  $^1\text{H NMR}$  (400 MHz,  $\text{CDCl}_3$ ):  $\delta$  7.62 (d,  $J$  = 7.9 Hz, 1H), 7.47 (dd,  $J$  = 7.6, 1.6 Hz, 1H), 7.41 – 7.34 (m, 1H), 7.30 (td,  $J$  = 7.8, 1.9 Hz, 1H), 3.58 (t,  $J$  = 6.2 Hz, 2H), 3.45 (t,  $J$  = 6.4 Hz, 2H), 2.63 (s, 3H), 2.10 – 1.98 (m, 2H), 1.99 – 1.87 (m, 2H).  $^{13}\text{C NMR}$  (101 MHz,  $\text{CDCl}_3$ ):  $\delta$  201.2, 141.4, 133.8, 131.7, 128.9, 127.4, 118.8, 44.0, 32.7, 30.8, 30.3, 29.7. **HRMS** (ESI-TOF) calculated for  $\text{C}_{12}\text{H}_{15}\text{ClO}$   $[\text{M}]^+$  210.0806, found 210.0807.

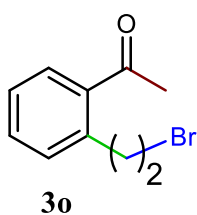

**1-(2-(2-bromoethyl)phenyl)ethan-1-one (3o):**

General procedure as stated above was followed for the synthesis of **3o** from acetophenone (0.240 g, 2 mmol, 1 equiv.) and 1,2-dibromoethane (2 mmol, 0.375 g, 1 equiv.). The product was purified by column chromatography (silica gel, gradient elution with 2.5% and 5% ethyl acetate in hexanes), yielding a yellow liquid of 1-(2-(2-bromoethyl)phenyl)ethan-1-one (0.43g, 95%) with a boiling point of 250 °C.  $R_f$  = 0.39; TLC in 2.5% ethyl acetate in hexane with three runs and stained with 2,4-DNP.  $^1\text{H NMR}$  (400 MHz,  $\text{CDCl}_3$ ):  $\delta$  7.62 (dd,  $J$  = 7.9, 0.8 Hz, 1H), 7.47 (dd,  $J$  = 7.6, 1.7 Hz, 1H), 7.38 (td,  $J$  = 7.5, 1.0 Hz, 1H), 7.30 (td,  $J$  = 7.7, 1.7 Hz, 1H), 3.44 (t,  $J$  = 2.2 Hz, 2H), 2.64 (s, 3H), 2.03 (t,  $J$  = 3.1 Hz, 2H).  $^{13}\text{C NMR}$  (101 MHz,  $\text{CDCl}_3$ ):  $\delta$  201.3, 141.4, 133.84, 131.8, 128.9, 127.4, 118.8, 32.5, 30.9, 30.3. **HRMS** (ESI-TOF) calculated for  $\text{C}_{10}\text{H}_{11}\text{BrO}$   $[\text{M}+\text{NH}_4]^+$  246.0312, found 246.0325.



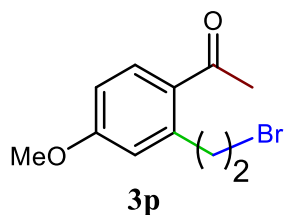

**1-(2-(2-bromoethyl)-4-methoxyphenyl)ethan-1-one (3p):** General procedure as stated above was followed for the synthesis of **3p** from 4-methoxyacetophenone (0.300 g, 2 mmol, 1 equiv.) and 1,4-dibromobutane (2 mmol, 0.375 g, 1 equiv.). The product was purified by column chromatography (silica gel, gradient elution: 2.5%, 5%, ethyl acetate in hexanes), and a colourless liquid, 1-(2-(2-bromoethyl)-4-methoxyphenyl)ethan-1-one (0.47g, 94%), was obtained with a boiling point of 224 °C.  $R_f$  = 0.61; TLC in 2.5% ethyl acetate in hexane with three runs and stained with 2,4-DNP.

**$^1\text{H}$  NMR** (400 MHz,  $\text{CDCl}_3$ ):  $\delta$  7.55 (d,  $J$  = 8.3 Hz, 1H), 6.99 – 6.98 (dd,  $J$  = 7.2, 2.4 Hz, 1H), 6.14 (s, 1H), 3.96 (s, 3H), 3.44 (t,  $J$  = 2.2 Hz, 2H), 2.64 (s, 3H), 2.37 (t,  $J$  = 3.1 Hz, 2H).  **$^{13}\text{C}$  NMR** (101 MHz,  $\text{CDCl}_3$ ): 196.8, 150.4, 146.6, 130.3, 124.0, 113.8, 109.7, 56.0, 34.9, 31.1, 26.2. **HRMS** (ESI-TOF) calculated for  $\text{C}_{11}\text{H}_{13}\text{BrO}_2$   $[\text{M}]^+$  258.0074, found 258.0078.

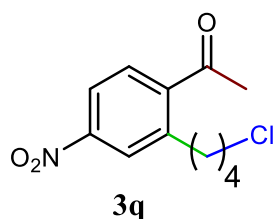

**1-(2-(4-chlorobutyl)-4-nitrophenyl)ethan-1-one (3q):** General procedure as stated above was followed for the synthesis of **3q** from 4-nitroacetophenone (0.330 g, 2 mmol, 1 equiv.) and 1-chloro-4-dibromobutane (2 mmol, 0.342 g, 1 equiv.). The product was purified by column chromatography (silica gel, gradient elution: 5%, 10%, 15% ethyl acetate in hexanes), yielding a yellow solid, 1-(2-(4-chlorobutyl)-4-nitrophenyl)ethan-1-one (0.40g, 85%), with a melting point of 188 °C.  $R_f$  = 0.26; TLC in 5% ethyl acetate in hexane with three runs and stained with 2,4-DNP.  **$^1\text{H}$  NMR** (400 MHz,  $\text{CDCl}_3$ ):  $\delta$  8.00 (d,  $J$  = 2.1 Hz, 1H), 7.50 (dd,  $J$  = 8.2, 2.2 Hz, 1H), 7.32 (d,  $J$  = 8.2 Hz, 1H), 3.60 (t,  $J$  = 6.2 Hz, 2H), 3.47 (t,  $J$  = 6.3 Hz, 2H), 2.60 (s, 3H), 2.11 – 2.02 (m, 2H), 1.97 (tt,  $J$  = 6.7, 3.6 Hz, 2H).  **$^{13}\text{C}$  NMR** (101 MHz,  $\text{CDCl}_3$ ):  $\delta$  200.36, 133.8, 133.0, 132.0, 124.7, 43.9, 32.71, 30.8, 29.7, 20.0. **HRMS** (ESI-TOF) calculated for  $\text{C}_{12}\text{H}_{14}\text{ClNO}_3$   $[\text{M}+\text{K}]^+$  294.0294, found 294.0291.

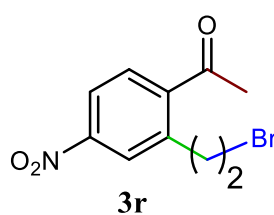

**1-(2-(2-bromoethyl)-4-nitrophenyl)ethan-1-one (3r):** General procedure as stated above was followed for the synthesis of **3r** from 4-nitroacetophenone (0.330 g, 2 mmol, 1 equiv.) and 1,2-dibromoethane (2 mmol, 0.375 g, 1 equiv.). The product was purified by column chromatography (silica gel, gradient elution with 2.5% and 5% ethyl acetate in hexanes), yielding a yellow liquid, 1-(2-(2-bromoethyl)-4-nitrophenyl)ethan-1-one (0.42g, 90%), with a boiling point of 250 °C.  $R_f$  = 0.39; TLC in 2.5% ethyl acetate in hexane with three runs and stained with 2,4-DNP.  **$^1\text{H}$  NMR** (400 MHz,  $\text{CDCl}_3$ ):  $\delta$  8.00 (d,  $J$  = 2.1 Hz, 1H), 7.50 (dd,  $J$  = 8.2, 2.2 Hz, 1H), 7.32 (d,  $J$  = 8.2 Hz, 1H), 3.58 (t,  $J$  = 2.2 Hz, 2H), 2.64 (s, 3H), 2.38 (t,  $J$  = 3.1 Hz, 2H).  **$^{13}\text{C}$  NMR** (101 MHz,  $\text{CDCl}_3$ ):  $\delta$  196.8, 133.8, 133.0, 132.4, 132.0, 124.7, 34.8, 31.1, 20.0. **HRMS** (ESI-TOF) calculated for  $\text{C}_{10}\text{H}_{10}\text{BrNO}_3$   $[\text{M}+\text{Na}]^+ [-\text{H}_2\text{O}]$  277.9611, found 277.9589.



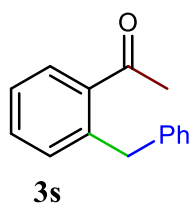

**1-(2-benzylphenyl) ethan-1-one (3s):** General procedure as stated above was followed for the synthesis of **3s** from acetophenone (0.240 g, 2 mmol, 1 equiv.) and benzyl bromide (2 mmol, 0.342 g, 1 equiv.). The product was purified by column chromatography (silica gel, gradient elution with 2.5% and 5% ethyl acetate in hexanes), yielding a yellow liquid of 1-(2-benzylphenyl)ethan-1-one (0.40g, 95%) with a boiling point of 236 °C.  $R_f = 0.26$ ; TLC in 2.5% ethyl acetate in hexane with three runs and stained with 2,4-DNP.  $^1\text{H NMR}$  (400 MHz,  $\text{CDCl}_3$ ):  $\delta$  7.63 (dd,  $J = 7.9, 1.0$  Hz, 1H), 7.49 (dd,  $J = 7.6, 1.7$  Hz, 1H), 7.41 (m, 2H), 7.37 (ddd,  $J = 7.1, 3.9, 1.9$  Hz, 2H), 7.34 – 7.30 (m, 2H), 7.29 (dd,  $J = 3.6, 1.8$  Hz, 1H), 4.52 (s, 2H), 2.65 (s, 3H).  $^{13}\text{C NMR}$  (101 MHz,  $\text{CDCl}_3$ ):  $\delta$  201.3, 141.4, 137.8, 133.8, 131.8, 129.0, 128.9, 128.8, 128.4, 127.4, 118.9, 33.6, 30.3. **HRMS** (ESI-TOF) calculated for  $\text{C}_{15}\text{H}_{14}\text{O}$   $[\text{M}+\text{H}]^+$  211.1117, found 211.1116.

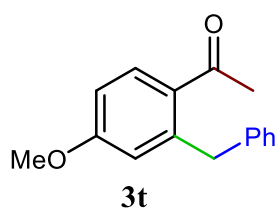

**1-(2-benzyl-4-methoxyphenyl) ethan-1-one (3t):** General procedure as stated above was followed for the synthesis of **3t** from 4-methoxyacetophenone (0.300 g, 2 mmol, 1 equiv.) and benzyl bromide (2 mmol, 0.342 g, 1 equiv.). The product was purified by column chromatography (silica gel, gradient elution: 2.5% to 5% ethyl acetate in hexanes), yielding a yellow liquid, 1-(2-benzyl-4-methoxyphenyl)ethan-1-one (0.45g, 93%), with a boiling point of 202 °C.  $R_f = 0.26$ ; TLC in 2.5% ethyl acetate in hexane with three runs and stained with 2,4-DNP.  $^1\text{H NMR}$  (400 MHz,  $\text{CDCl}_3$ ):  $\delta$  7.62 – 7.52 (m, 1H), 7.46 – 7.39 (m, 2H), 7.40 – 7.36 (m, 2H), 7.36 – 7.32 (m, 1H), 7.01 – 6.96 (m, 1H), 6.20 (s, 1H), 4.53 (s, 3H), 3.97 (s, 3H), 2.59 (s, 3H).  $^{13}\text{C NMR}$  (101 MHz,  $\text{CDCl}_3$ ):  $\delta$  196.8, 150.4, 146.6, 137.80, 130.2, 129.0, 128.8, 128.4, 124.0, 113.8, 109.7, 56.0, 33.6, 26.2. **HRMS** (ESI-TOF) calculated for  $\text{C}_{16}\text{H}_{16}\text{O}_2$   $[\text{M}]^+$  240.1145, found 240.1140.

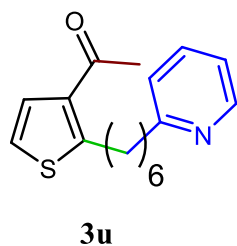

**1-(2-(6-(pyridin-2-yl)hexyl)thiophen-3-yl)ethan-1-one (3u):** General procedure as stated above was followed for the synthesis of **3u** from 3-acetylthiophene (0.252 g, 2 mmol, 1 equiv.) and 2-(bromohexyl)pyridine (2 mmol, 0.394 g, 1 equiv.). The product was purified by column chromatography (silica gel, gradient elution 5%, 10%, 15% ethyl acetate in hexanes) and a yellow liquid of 1-(2-(6-(pyridin-2-yl)hexyl)thiophen-3-yl) ethan-1-one was obtained (0.50g, 86%) with a boiling point of 242 °C.  $R_f = 0.26$ ; TLC in 2.5% ethyl acetate in hexane with three runs and stained with 2,4-DNP.  $^1\text{H NMR}$  (400 MHz,  $\text{CDCl}_3$ ):  $\delta$  8.31 (dd,  $J = 4.7, 1.5$  Hz, 1H), 7.54 – 7.47 (m, 1H), 7.42 (d,  $J = 8.0$  Hz, 1H), 7.25 – 7.15 (m, 1H), 6.96 (d,  $J = 5.7$  Hz, 1H), 6.74 (d,  $J = 5.7$  Hz, 1H), 3.35 (t,  $J = 6.9$  Hz, 2H), 2.57 – 2.41 (m, 2H), 2.11 (s, 3H), 1.87 – 1.71 (m, 2H), 1.57 – 1.45 (m, 1H), 1.36 (dd,  $J = 14.6, 6.9$  Hz, 1H), 1.24 (dd,  $J = 6.7, 2.9$  Hz, 2H), 0.86 – 0.80 (m, 2H).  $^{13}\text{C NMR}$  (101 MHz,  $\text{CDCl}_3$ ):  $\delta$  206.6, 150.1, 142.22, 139.1, 138.4, 128.2, 127.8, 124.2, 122.5, 121.9, 33.9, 32.7, 31.5, 30.9, 30.8, 29.5, 28.8, 27.8, 22.5, 14.0, 13.9. **HRMS** (ESI-TOF) calculated for  $\text{C}_{17}\text{H}_{21}\text{NOS}$   $[\text{M}+\text{Na}]^+$  310.1236, found 310.1230.

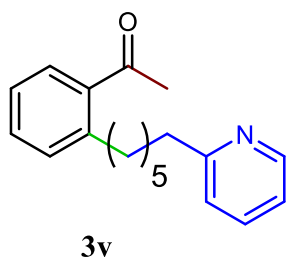

**1-(2-(6-(pyridin-2-yl) hexyl) phenyl) ethan-1-one (3v):** General procedure as stated above was followed for the synthesis of **3v** from acetophenone (0.240 g, 2 mmol, 1 equiv.) and 2-(bromohexyl)pyridine (2 mmol, 0.394 g, 1 equiv.). The product was purified by column chromatography (silica gel, gradient elution 5%, 10%, 15% ethyl acetate in hexanes) and a yellow liquid of 1-(2-(6-(pyridin-2-yl)hexyl)phenyl)ethan-1-one was obtained (0.49g, 86%) with a boiling point of 245 °C.  $R_f = 0.26$ ; TLC in 2.5% ethyl acetate in hexane with three runs and stained with 2,4-DNP. **<sup>1</sup>H NMR** (400 MHz, CDCl<sub>3</sub>):  $\delta$  7.63 (dd,  $J = 7.9, 0.9$  Hz, 2H), 7.48 (dd,  $J = 7.6, 1.7$  Hz, 2H), 7.38 (td,  $J = 7.5, 1.1$  Hz, 2H), 7.34 – 7.28 (m, 2H), 3.42 (t,  $J = 6.9$  Hz, 2H), 2.65 (s, 3H), 1.93 – 1.80 (m, 2H), 1.49 – 1.40 (m, 2H), 1.36 – 1.25 (m, 4H), 0.91 (t,  $J = 6.9$  Hz, 2H). **<sup>13</sup>C NMR** (101 MHz, CDCl<sub>3</sub>):  $\delta$  201.3, 141.5, 133.8, 131.8, 128.2, 127.8, 118.9, 33.9, 32.7, 31.5, 30.9, 27.8, 22.4, 13.9. **HRMS** (ESI-TOF) calculated for C<sub>19</sub>H<sub>23</sub>NO [M]<sup>+</sup> 281.1779, found 281.1777.

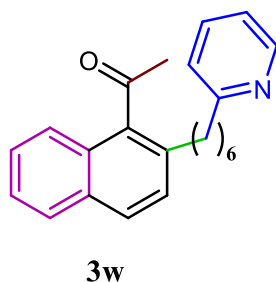

**1-(2-(6-(pyridin-2-yl)hexyl)naphthalen-1-yl)ethan-1-one (3w):** General procedure as stated above was followed for the synthesis of **3w** from 1'-Acetonaphthone (0.340 g, 2 mmol, 1 equiv.) and 2-(6-bromohexyl)pyridine (2 mmol, 0.394 g, 1 equiv.). The product was purified by column chromatography (silica gel, gradient elution 5%, 10%, 15% ethyl acetate in hexanes) and a yellow liquid of 1-(2-(6-(pyridin-2-yl)hexyl)naphthalen-1-yl)ethan-1-one was obtained (0.54g, 82%) with a boiling point of 248 °C.  $R_f = 0.26$ ; TLC in 5% ethyl acetate in hexane with three runs and stained with 2,4-DNP. **<sup>1</sup>H NMR** (400 MHz, CDCl<sub>3</sub>):  $\delta$  8.77 (d,  $J = 8.6$  Hz, 1H), 8.41 (dd,  $J = 4.8, 1.6$  Hz, 1H), 8.02 (d,  $J = 8.2$  Hz, 1H), 7.96 (d,  $J = 7.2$  Hz, 1H), 7.90 (d,  $J = 7.9$  Hz, 1H), 7.70 – 7.60 (m, 2H), 7.60 – 7.46 (m, 2H), 7.35 (d,  $J = 8.0$  Hz, 1H), 7.24 (dd,  $J = 7.4, 4.9$  Hz, 1H), 3.42 (t,  $J = 6.9$  Hz, 2H), 2.77 (s, 3H), 1.88 (dd,  $J = 14.5, 7.3$  Hz, 2H), 1.45 (dt,  $J = 14.7, 7.4$  Hz, 3H), 1.36 – 1.27 (m, 3H), 0.92 (t,  $J = 6.8$  Hz, 2H). **<sup>13</sup>C NMR** (101 MHz, CDCl<sub>3</sub>):  $\delta$  201.8, 151.61, 149.8, 138.7, 135.4, 133.9, 133.0, 130.1, 128.6, 128.4, 128.0, 126.4, 126.0, 124.4, 124.3, 122.2, 34.0, 32.8, 30.9, 29.9, 27.8, 22.4, 13.9. **HRMS** (ESI-TOF) calculated for C<sub>23</sub>H<sub>25</sub>NO [M+K]<sup>+</sup> 370.1936, found 370.1621.

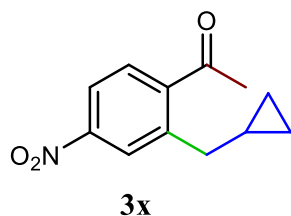

**1-(2-(cyclopropylmethyl)-4-nitrophenyl)ethan-1-one (3x):** General procedure as stated above was followed for the synthesis of **3x** from 4-nitroacetophenone (0.330 g, 2 mmol, 1 equiv.) and (chloromethyl)cyclopropane (2 mmol, 0.180 g, 1 equiv.). The product was purified by column chromatography (silica gel, gradient elution 5%, 10%, 15% ethyl acetate in hexanes) and a yellow solid of 1-(2-(cyclopropylmethyl)-4-nitrophenyl)ethan-1-one was obtained (0.37g, 84%) with a melting point of 157 °C.  $R_f = 0.28$ ; TLC in 5% ethyl acetate in hexane with three runs and stained with 2,4-DNP. **<sup>1</sup>H NMR** (400 MHz, CDCl<sub>3</sub>):  $\delta$  8.00 (d,  $J = 2.1$  Hz, 1H), 7.50 (dd,  $J = 8.2, 2.2$  Hz, 1H),

7.32 (d,  $J = 8.2$  Hz, 1H), 3.46 (d,  $J = 7.4$  Hz, 2H), 2.59 (s, 3H), 1.25 (tt,  $J = 7.7, 4.8$  Hz, 1H), 0.77 – 0.61 (m, 2H), 0.37 (q,  $J = 4.8$  Hz, 2H).  $^{13}\text{C}$  NMR (101 MHz,  $\text{CDCl}_3$ ):  $\delta$  196.2, 149.9, 141.3, 136.69, 136.1, 129.3, 123.8, 50.7, 26.9, 13.8, 5.7. HRMS (ESI-TOF) calculated for  $\text{C}_{12}\text{H}_{13}\text{NO}_3$   $[\text{M}+\text{H}]^+$  220.0895, found 220.0915.

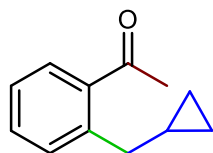

**3y**

**1-(2-(cyclopropylmethyl) phenyl) ethan-1-one (3y):** General procedure as stated above was followed for the synthesis of **3y** from acetophenone (0.240 g, 2 mmol, 1 equiv.) and (bromomethyl)cyclopropane (2 mmol, 0.180 g, 1 equiv.). The product was purified by column chromatography (silica gel, gradient elution with 2.5% and 5% hexanes), yielding a yellow, oily liquid of 1-(2-(cyclopropylphenyl)ethan-1-one (0.33g, 94%), with a boiling point of 250 °C.  $R_f = 0.23$ ; TLC in 2.5% ethyl acetate in hexane with three runs and stained with 2,4-DNP.  $^1\text{H}$  NMR (400 MHz,  $\text{CDCl}_3$ ):  $\delta$  7.62 (dd,  $J = 7.9, 1.0$  Hz, 1H), 7.48 (dd,  $J = 7.6, 1.7$  Hz, 1H), 7.38 (td,  $J = 7.5, 1.2$  Hz, 1H), 7.32 (dd,  $J = 7.8, 1.8$  Hz, 1H), 3.44 (d,  $J = 7.4$  Hz, 2H), 2.64 (s, 3H), 1.24 (m, 1H), 0.75 – 0.64 (m, 2H), 0.40 – 0.31 (m, 2H).  $^{13}\text{C}$  NMR (101 MHz,  $\text{CDCl}_3$ ): 201.2, 141.4, 133.8, 131.7, 128.9, 127.4, 118.8, 50.6, 34.9, 30.3, 13.8, 5.7. HRMS (ESI-TOF) calculated for  $\text{C}_{12}\text{H}_{14}\text{O}$   $[\text{M}+\text{H}]^+$  174.1044, found 174.1030.

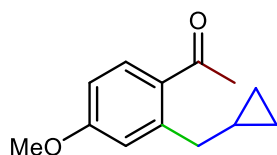

**3z**

**1-(2-(cyclopropylmethyl)-4-methoxyphenyl)ethan-1-one (3z):** General procedure as stated above was followed for the synthesis of **3z** from 4-methoxyacetophenone (0.300 g, 2 mmol, 1 equiv.) and (chloromethyl)cyclopropane (2 mmol, 0.180 g, 1 equiv.). The product was purified by column chromatography (silica gel, gradient elution: 2.5% to 5% ethyl acetate in hexanes), yielding a yellow liquid of 1-(2-(cyclopropylmethyl)-4-methoxyphenyl)ethan-1-one (0.34g, 85%) with a boiling point of 211 °C.  $R_f = 0.5$ ; TLC in 2.5% ethyl acetate in hexane with three runs and stained with 2,4-DNP.  $^1\text{H}$  NMR (400 MHz,  $\text{CDCl}_3$ ):  $\delta$  7.55 (d,  $J = 8.3$  Hz, 1H), 6.99 – 6.98 (dd,  $J = 7.2, 2.4$  Hz, 1H), 6.14 (s, 1H), 3.96 (s, 3H), 3.44 (d,  $J = 7.4$  Hz, 2H), 2.64 (s, 3H), 1.24 (m, 1H), 0.75 – 0.64 (m, 2H), 0.40 – 0.31 (m, 2H).  $^{13}\text{C}$  NMR (101 MHz,  $\text{CDCl}_3$ ): 196.7, 150.3, 146.6, 130.2, 123.9, 113.7, 109.7, 56.0, 50.6, 26.1, 13.8, 5.7. HRMS (ESI-TOF) calculated for  $\text{C}_{13}\text{H}_{16}\text{O}_2$   $[\text{M}]^+$  204.1150, found 204.1130.

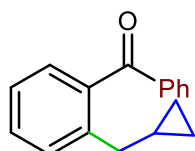

**3aa**

**(2(cyclopropylmethyl)phenyl)(phenyl)methanone (3aa):** General procedure as stated above was followed for the synthesis of **3aa** from benzophenone (0.364 g, 2 mmol, 1 equiv.) and 2-Chloro-2-methyl cyclopropane (2 mmol, 0.180 g, 1 equiv.). The product was purified by column chromatography (silica gel, gradient elution: 2.5%, 5%, 10% ethyl acetate in hexanes), yielding a brown solid of (2(cyclopropylmethyl)phenyl)(phenyl)methanone (0.39g, 85%) with a melting point of 90 °C.  $R_f = 0.26$ ; TLC in 2.5% ethyl acetate in hexane with three runs and stained with 2,4-DNP.  $^1\text{H}$  NMR (400 MHz,  $\text{CDCl}_3$ ):  $\delta$  7.80 – 7.71 (m, 2H), 7.69 – 7.64 (m, 2H), 7.64 – 7.60 (m, 2H), 7.60 – 7.55 (m, 2H), 7.47 (dd,  $J = 10.6, 4.6$  Hz, 1H), 3.46 (d,  $J = 7.4$  Hz, 2H), 2.59 (s, 3H), 1.25 (tt,  $J =$

7.7, 4.8 Hz, 1H), 0.77 – 0.61 (m, 2H), 0.37 (q,  $J$  = 4.8 Hz, 2H).  $^{13}\text{C}$  NMR (101 MHz,  $\text{CDCl}_3$ ):  $\delta$  195.3, 137.1, 136.3, 132.5, 131.5, 131.50, 129.8, 128.3, 127.3, 50.5, 34.9, 13.7, 5.68 HRMS (ESI-TOF) calculated for  $\text{C}_{17}\text{H}_{16}\text{O}$   $[\text{M}+\text{H}]^+$  236.1201, found 236.1197.

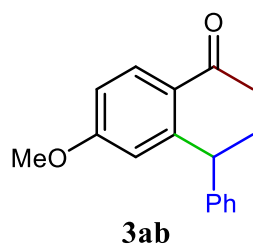

**1-(4-methoxy-2-(1-phenylethyl)phenyl)ethan-1-one (3ab):** General procedure as stated above was followed for the synthesis of **3ab** from 4-methoxyacetophenone (0.300 g, 2 mmol, 1 equiv.) and (1-chloroethyl)benzene (2 mmol, 0.281 g, 1 equiv.). The product was purified by column chromatography (silica gel, gradient elution: 5%, 10%, 15% ethyl acetate in hexanes), yielding a yellow liquid of 1-(4-methoxy-2-(1-phenylethyl)phenyl)ethan-1-one (0.46g, 91%) with a boiling point of 220 °C.  $R_f$  = 0.2; TLC in 2.5% ethyl acetate in hexane with three runs and stained with 2,4-DNP.  $^1\text{H}$  NMR (400 MHz,  $\text{CDCl}_3$ ):  $\delta$  7.58 (d,  $J$  = 2.5 Hz, 1H), 7.49 – 7.43 (m, 2H), 7.39 (t,  $J$  = 4.3 Hz, 2H), 7.36 – 7.32 (m, 1H), 6.99 (d,  $J$  = 8.7 Hz, 1H), 6.20 (s, 1H), 5.13 (q,  $J$  = 6.8 Hz, 1H), 3.97 (s, 3H), 2.59 (s, 3H), 1.89 (d,  $J$  = 6.8 Hz, 3H).  $^{13}\text{C}$  NMR (101 MHz,  $\text{CDCl}_3$ ):  $\delta$  196.8, 150.4, 146.6, 142.8, 130.2, 128.6, 128.2, 126.5, 124.0, 113.8, 109.7, 58.8, 56.0, 26.5, 26.2. HRMS (ESI-TOF) calculated for  $\text{C}_{17}\text{H}_{18}\text{O}_2$   $[\text{M}+\text{H}]^+$  254.1307, found 254.1308.

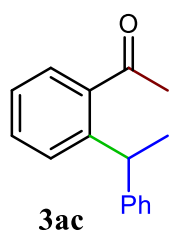

**1-(2-(1-phenylethyl)phenyl)ethan-1-one (3ac):** General procedure as stated above was followed for the synthesis of **3ac** from acetophenone (0.240 g, 2 mmol, 1 equiv.) and (1-chloroethyl)benzene (2 mmol, 0.281 g, 1 equiv.). The product was purified by column chromatography (silica gel, gradient elution with 2.5% and 5% ethyl acetate in hexanes), yielding a yellow liquid of 1-(2-(1-phenylethyl)phenyl)ethan-1-one (0.43g, 95%) with a boiling point of 215 °C.  $R_f$  = 0.40; TLC in 2.5% ethyl acetate in hexane with three runs and stained with 2,4-DNP.  $^1\text{H}$  NMR (400 MHz,  $\text{CDCl}_3$ ):  $\delta$  7.65 (dd,  $J$  = 7.2, 3.3 Hz, 1H), 7.65 – 7.57 (m, 1H), 7.54 – 7.49 (m, 1H), 7.47 (m, 2H), 7.43 – 7.38 (m, 2H), 7.37 – 7.32 (m, 2H), 5.14 (q,  $J$  = 6.8 Hz, 1H), 2.64 (s, 3H), 1.90 (d,  $J$  = 6.8 Hz, 3H).  $^{13}\text{C}$  NMR (101 MHz,  $\text{CDCl}_3$ ):  $\delta$  201.3, 142.8, 141.4, 133.8, 131.8, 128.9, 128.6, 127.4, 126.5, 118.9, 58.7, 30.3, 26.5. HRMS (ESI-TOF) calculated for  $\text{C}_{16}\text{H}_{16}\text{O}$   $[\text{M}+\text{H}]^+$  225.1201, found 225.1241,

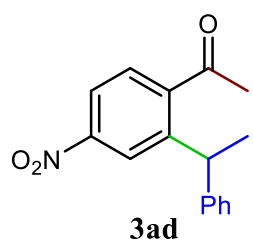

**1-(4-nitro-2-(1-phenylethyl)phenyl)ethan-1-one (3ad):** General procedure as stated above was followed for the synthesis of **3ad** from 4-nitroacetophenone (0.330 g, 2 mmol, 1 equiv.) and (1-chloroethyl)benzene (2 mmol, 0.281 g, 1 equiv.). The product was purified by column chromatography (silica gel, gradient elution: 5%, 10%, 15% ethyl acetate in hexanes), yielding a yellow liquid of 1-(4-nitro-2-(1-phenylethyl)phenyl)ethan-1-one (0.47g, 87%) with a boiling point of 210 °C.  $R_f$  = 0.26; TLC in 5% ethyl acetate in hexane with three runs and stained with 2,4-DNP.  $^1\text{H}$  NMR (400 MHz,  $\text{CDCl}_3$ ):  $\delta$  8.02 (d,  $J$  = 2.1 Hz, 1H), 7.50 – 7.43 (m, 2H), 7.40 (dd,  $J$  = 9.9, 4.8 Hz, 3H), 7.37 – 7.31 (m, 2H), 5.14 (q,  $J$  = 6.8 Hz, 1H), 2.61 (s, 3H), 1.90 (d,  $J$  = 6.8 Hz, 3H).  $^{13}\text{C}$  NMR (101 MHz,

CDCl<sub>3</sub>):  $\delta$  196.2, 150.4, 146.6, 142.8, 130.2, 128.6, 128.2, 126.5, 124.0, 113.8, 109.7, 58.8, 27.01, 26.6. **HRMS** (ESI-TOF) calculated for C<sub>16</sub>H<sub>15</sub>NO<sub>3</sub> [M+H]<sup>+</sup> 270.1052, found 270.1122.

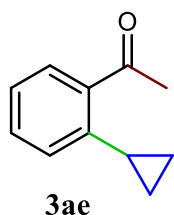

**1-(2-cyclopropylphenyl) ethan-1-one (3ae):** General procedure as stated above was followed for the synthesis of **3ae** from acetophenone (0.240 g, 2 mmol, 1 equiv.) and bromocyclopropane (2 mmol, 0.241 g, 1 equiv.). The product was purified by column chromatography (silica gel, gradient elution: 2.5% to 5% ethyl acetate in hexanes), yielding a yellow, oily liquid of 1-(2-cyclopropylphenyl)ethan-1-one (0.35g, 94%) with a boiling point of 228 °C.  $R_f$  = 0.43; TLC in 2.5% ethyl acetate in hexane with three runs and stained with 2,4-DNP. **<sup>1</sup>H NMR** (400 MHz, CDCl<sub>3</sub>):  $\delta$  7.63 (dd,  $J$  = 7.9, 0.7 Hz, 1H), 7.48 (dd,  $J$  = 7.6, 1.7 Hz, 1H), 7.38 (td,  $J$  = 7.5, 1.0 Hz, 1H), 7.33 – 7.27 (m, 1H), 2.92 – 2.83 (m, 1H), 2.64 (s, 3H), 1.02 – 0.95 (m, 2H), 0.90 – 0.85 (m, 2H). **<sup>13</sup>C NMR** (101 MHz, CDCl<sub>3</sub>):  $\delta$  201.2, 141.4, 133.8, 131.7, 128.9, 127.4, 118.8, 30.3, 14.3, 9.0. **HRMS** (ESI-TOF) calculated for C<sub>11</sub>H<sub>12</sub>O [M+Na]<sup>+</sup> 183.0888, found 183.0882.

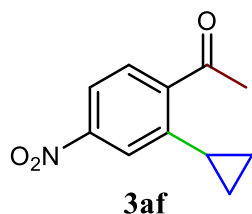

**1-(2-cyclopropyl-4-nitrophenyl) ethan-1-one (3af):** General procedure as stated above was followed for the synthesis of **3af** from 4-nitroacetophenone (0.330 g, 2 mmol, 1 equiv.) and bromocyclopropane (2 mmol, 0.241 g, 1 equiv.). The product was purified by column chromatography (silica gel, gradient elution: 2.5%, 5%, 10% ethyl acetate in hexanes), yielding a yellow liquid of 1-(2-cyclopropyl-4-nitrophenyl)ethan-1-one (0.34g, 84%) with a boiling point of 231 °C.  $R_f$  = 0.48; TLC in 2.5% ethyl acetate in hexane with three runs and stained with 2,4-DNP. **<sup>1</sup>H NMR** (400 MHz, CDCl<sub>3</sub>):  $\delta$  8.00 (d,  $J$  = 2.1 Hz, 1H), 7.50 (dd,  $J$  = 8.2, 2.2 Hz, 1H), 7.32 (d,  $J$  = 8.2 Hz, 1H), 2.96 – 2.83 (m, 1H), 2.60 (s, 3H), 1.03 – 0.96 (m, 2H), 0.91 – 0.86 (m, 2H). **<sup>13</sup>C NMR** (101 MHz, CDCl<sub>3</sub>):  $\delta$  196.7, 150.4, 146.6, 130.2, 123.9, 113.7, 109.7, 56.0, 26.1, 14.3, 9.0. **HRMS** (ESI-TOF) calculated for C<sub>11</sub>H<sub>11</sub>NO<sub>3</sub> [M+H]<sup>+</sup>: 206.0739; found: 206.1016.

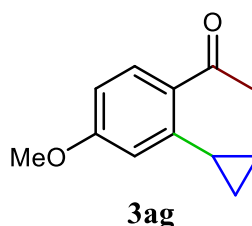

**1-(2-cyclopropyl-4-methoxyphenyl) ethan-1-one (3ag):** General procedure as stated above was followed for the synthesis of **3ag** from 4-methoxyacetophenone (0.300 g, 2 mmol, 1 equiv.) and bromocyclopropane (2 mmol, 0.241g, 1 equiv.). The product was purified by column chromatography (silica gel, gradient elution: 2.5% to 5% ethyl acetate in hexanes), yielding a yellow liquid of 1-(2-cyclopropyl-4-methoxyphenyl)ethan-1-one (0.34g, 91%) with a boiling point of 185 °C.  $R_f$  = 0.6; TLC in 2.5% ethyl acetate in hexane with three runs and stained with 2,4-DNP. **<sup>1</sup>H NMR** (400 MHz, CDCl<sub>3</sub>):  $\delta$  7.56 (d,  $J$  = 8.3 Hz, 1H), 6.97 (d,  $J$  = 8.7 Hz, 1H), 6.11 (s, 1H), 3.91 (s, 3H), 2.86 (td,  $J$  = 7.1, 3.6 Hz, 1H), 2.63 (s, 3H), 1.03 – 0.94 (m, 2H), 0.90 – 0.81 (m, 2H). **<sup>13</sup>C NMR** (101 MHz, CDCl<sub>3</sub>):  $\delta$  196.7, 150.4, 146.6, 130.2, 123.9, 113.7, 109.7, 56.0, 26.1, 14.3, 9.0. **HRMS** (ESI-TOF) calculated for C<sub>12</sub>H<sub>14</sub>O<sub>2</sub> [M+H]<sup>+</sup>: 190.0994; found: 190.0986.

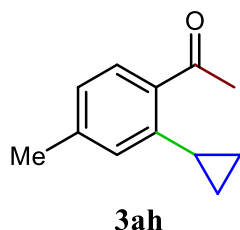

**1-(2-cyclopropyl-4-methylphenyl) ethan-1-one (3ah):** General procedure as stated above was followed for the synthesis of **3ah** from 4-methylacetophenone (0.268 g, 2 mmol, 1 equiv.) and bromocyclopropane (2 mmol, 0.241 g, 1 equiv.). The product was purified by column chromatography (silica gel, gradient elution: 2.5% to 5% ethyl acetate in hexanes), yielding a yellow liquid of 1-(2-cyclopropyl-4-methylphenyl)ethan-1-one (0.33g, 94%) with a boiling point of 218 °C.  $R_f$  = 0.26; TLC in 2.5% ethyl acetate in hexane with three runs and stained with 2,4-DNP.  $^1\text{H NMR}$  (400 MHz,  $\text{CDCl}_3$ ):  $\delta$  7.56 (d,  $J$  = 8.3 Hz, 1H), 6.97 (d,  $J$  = 8.7 Hz, 1H), 6.11 (s, 1H), 3.91 (s, 3H), 3.00 – 2.82 (m, 2H), 2.51 (s, 3H), 1.07 – 0.97 (m, 3H), 0.93 – 0.81 (m, 3H).  $^{13}\text{C NMR}$  (101 MHz,  $\text{CDCl}_3$ ):  $\delta$  196.7, 150.4, 146.6, 130.2, 123.9, 113.7, 109.7, 56.0, 26.1, 14.34, 9.0. **HRMS** (ESI-TOF) calculated for  $\text{C}_{12}\text{H}_{14}\text{O}$   $[\text{M}+\text{H}]^+$  174.1045, found 174.1039.

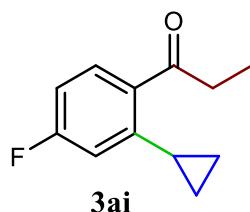

**1-(2-cyclopropyl-4-fluorophenyl)propan-1-one (3ai):** General procedure as stated above was followed for the synthesis of **3ai** from 4-fluoropropiophenone (0.304 g, 2 mmol, 1 equiv.) and bromocyclopropane (2 mmol, 0.241 g, 1 equiv.). The product was purified by column chromatography (silica gel, gradient elution: 2.5% to 5% ethyl acetate in hexanes), yielding a yellow liquid of 1-(2-cyclopropyl-4-fluorophenyl)propane-1-one (0.40g, 90%) with a boiling point of 244 °C.  $R_f$  = 0.26; TLC in 2.5% ethyl acetate in hexane with three runs and stained with 2,4-DNP.  $^1\text{H NMR}$  (400 MHz,  $\text{CDCl}_3$ ):  $\delta$  8.10 – 7.90 (m, 2H), 7.22 – 7.06 (m, 1H), 2.99 (q,  $J$  = 7.2 Hz, 2H), 2.91 – 2.83 (m, 1H), 1.27 – 1.20 (m, 3H), 1.02 – 0.94 (m, 2H), 0.92 – 0.85 (m, 2H).  $^{13}\text{C NMR}$  (101 MHz,  $\text{CDCl}_3$ ):  $\delta$  199.1, 165.6 (d,  $J_{\text{C-F}}$  = 254.2 Hz), 133.3 (d,  $J_{\text{C-F}}$  = 3.0 Hz), 130.5 (d,  $J_{\text{C-F}}$  = 9.3 Hz), 130.5, 115.7, 115.4, 31.7, 14.3, 9.0, 8.2.  $^{19}\text{F NMR}$  (377 MHz,  $\text{CDCl}_3$ )  $\delta$  -105.70 – -105.96 (m). **HRMS** (ESI-TOF) calculated for  $\text{C}_{12}\text{H}_{13}\text{FO}$   $[\text{M}]^+$  192.0950, found 192.0944.

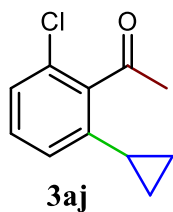

**1-(2-chloro-6-cyclopropylphenyl) ethan-1-one (3aj):** General procedure as stated above was followed for the synthesis of **3aj** from 2-chloroacetophenone (0.309 g, 2 mmol, 1 equiv.) and bromocyclopropane (2 mmol, 0.241 g, 1 equiv.). The product was purified by column chromatography (silica gel, gradient elution: 2.5% to 5% ethyl acetate in hexanes), yielding a yellow liquid of 1-(2-chloro-6-cyclopropylphenyl)ethan-1-one (0.34g, 87%) with a boiling point of 165 °C.  $R_f$  = 0.26; TLC in 2.5% ethyl acetate in hexane with three runs and stained with 2,4-DNP.  $^1\text{H NMR}$  (400 MHz,  $\text{CDCl}_3$ ):  $\delta$  7.61 (t,  $J$  = 9.9 Hz, 1H), 7.48 (dd,  $J$  = 7.6, 1.7 Hz, 1H), 7.35 – 7.28 (m, 1H), 2.92 – 2.83 (m, 1H), 2.64 (s, 3H), 1.02 – 0.95 (m, 2H), 0.90 – 0.85 (m, 2H).  $^{13}\text{C NMR}$  (101 MHz,  $\text{CDCl}_3$ ):  $\delta$  201.2, 141.4, 133.8, 131.7, 128.9, 127.4, 118.8, 30.3, 14.3, 9.0. **HRMS** (ESI-TOF) calculated for  $\text{C}_{11}\text{H}_{11}\text{ClO}$   $[\text{M}+\text{H}]^+$  194.0448, found 194.1170.



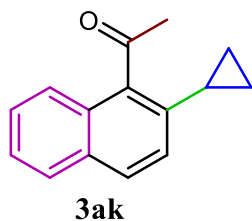

**1-(2-cyclopropylnaphthalen-1-yl)ethan-1-one (3ak):** General procedure as stated above was followed for the synthesis of **3ak** from 1'-acetonaphthone (0.340 g, 2 mmol, 1 equiv.) and bromocyclopropane (2 mmol, 0.241 g, 1 equiv.). The product was purified by column chromatography (silica gel, gradient elution: 2.5% to 5% ethyl acetate in hexanes), yielding a yellow liquid of 1-(2-cyclopropylnaphthalen-1-yl)ethan-1-one (0.40g, 92%) with a boiling point of 246 °C.  $R_f$  = 0.61; TLC in 2.5% ethyl acetate in hexane with three runs and stained with 2,4-DNP.  $^1\text{H NMR}$  (400 MHz,  $\text{CDCl}_3$ ):  $\delta$  8.78 (d,  $J$  = 8.6 Hz, 1H), 8.00 (t,  $J$  = 10.3 Hz, 1H), 7.98 – 7.91 (m, 1H), 7.91 (t,  $J$  = 7.7 Hz, 1H), 7.66 – 7.56 (m, 1H), 7.59 – 7.46 (m, 1H), 2.95 – 2.81 (m, 1H), 2.77 (s, 3H), 1.08 – 0.95 (m, 2H), 0.93 – 0.78 (m, 2H).  $^{13}\text{C NMR}$  (101 MHz,  $\text{CDCl}_3$ ):  $\delta$  201.8, 135.4, 133.9, 133.0, 130.1, 128.6, 128.4, 128.0, 126.4, 126.0, 124.3, 30.0, 14.4, 9.0. **HRMS** (ESI-TOF) calculated for  $\text{C}_{15}\text{H}_{14}\text{O}$   $[\text{M}+\text{H}]^+$  211.1044, found 211.1118.

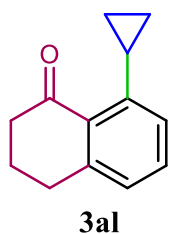

**8-cyclopropyl-3,4-dihydronaphthalen-1(2H)-one (3al):** General procedure as stated above was followed for the synthesis of **3al** from  $\alpha$ -tetralone (0.292 g, 2 mmol, 1 equiv.) and bromocyclopropane (2 mmol, 0.241 g, 1 equiv.). The product was purified by column chromatography (silica gel, gradient elution: 2.5% to 5% ethyl acetate in hexanes), yielding a yellow liquid of 8-cyclopropyl-3,4-dihydronaphthalen-1 (2H)-one (0.33g, 89%) with a boiling point of 185 °C.  $R_f$  = 0.48; TLC in 2.5% ethyl acetate in hexane with three runs and stained with 2,4-DNP.  $^1\text{H NMR}$  (400 MHz,  $\text{CDCl}_3$ ):  $\delta$  8.04 (d,  $J$  = 7.8 Hz, 1H), 7.47 (m, 1H), 7.33 – 7.26 (m, 1H), 2.95 – 2.81 (m, 1H), 2.97 (t,  $J$  = 6.1 Hz, 2H), 2.73 – 2.62 (m, 2H), 2.15 (dt,  $J$  = 12.7, 6.4 Hz, 2H), 1.08 – 0.95 (m, 2H), 0.93 – 0.78 (m, 2H).  $^{13}\text{C NMR}$  (101 MHz,  $\text{CDCl}_3$ ):  $\delta$  198.3, 144.4, 133.3, 132.6, 128.7, 127.1, 126.6, 39.1, 29.7, 23.3, 14.3, 9.0. **HRMS** (ESI-TOF) calculated for  $\text{C}_{13}\text{H}_{14}\text{O}$   $[\text{M}+\text{H}]^+$  187.1045, found 187.0842.

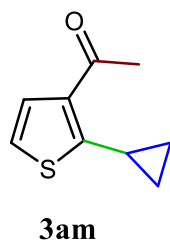

**1-(2-cyclopropylthiophen-3-yl)ethan-1-one (3 am):** General procedure as stated above was followed for the synthesis of **3am** from 3-acetylthiophene (0.252 g, 2 mmol, 1 equiv.) and bromocyclopropane (2 mmol, 0.241 g, 1 equiv.). The product was purified by column chromatography (silica gel, gradient elution: 5%, 10%, 15% ethyl acetate in hexanes), yielding a yellow liquid of 1-(2-cyclopropylthiophen-3-yl)ethan-1-one (0.29g, 87%) with a boiling point of 189 °C.  $R_f$  = 0.26; TLC in 2.5% ethyl acetate in hexane with three runs and stained with 2,4-DNP.  $^1\text{H NMR}$  (400 MHz,  $\text{CDCl}_3$ ):  $\delta$  7.58 (d,  $J$  = 3.6 Hz, 1H), 7.26 (d,  $J$  = 3.6 Hz, 1H), 2.94 – 2.78 (m, 1H), 2.17 (s, 3H), 1.02 – 0.96 (m, 2H), 0.93 – 0.81 (m, 2H).  $^{13}\text{C NMR}$  (101 MHz,  $\text{CDCl}_3$ ):  $\delta$  206.9, 152.0, 141.5, 121.1, 30.9, 14.3, 9.0. **HRMS** (ESI-TOF) calculated for  $\text{C}_9\text{H}_{10}\text{OS}$   $[\text{M}+\text{H}]^+$ : 167.2380; found: 167.0705.

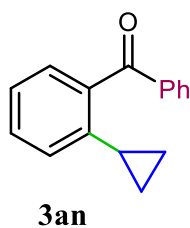

**(2-cyclopropylphenyl)(phenyl)methanone (3an):** General procedure as stated above was followed for the synthesis of **3an** from benzophenone (0.364 g, 2 mmol, 1 equiv.) and bromocyclopropane (2 mmol, 0.241 g, 1 equiv.). The product was purified by column chromatography (silica gel, gradient elution: 5%, 10%, 15% ethyl acetate in hexanes), and a brown solid of (2-cyclopropylphenyl)(phenyl)methanone (0.43g, 84%) was obtained, with a melting point of 90 °C.  $R_f = 0.26$ ; TLC in 5% ethyl acetate in hexane with three runs and stained with 2,4-DNP.  $^1\text{H NMR}$  (400 MHz,  $\text{CDCl}_3$ ):  $\delta$  7.80 – 7.71 (m, 2H), 7.69 – 7.64 (m, 2H), 7.64 – 7.60 (m, 2H), 7.60 – 7.55 (m, 2H), 7.47 (dd,  $J = 10.6, 4.6$  Hz, 1H), 2.94 – 2.78 (m, 1H), 1.02 – 0.96 (m, 2H), 0.93 – 0.81 (m, 2H).  $^{13}\text{C NMR}$  (101 MHz,  $\text{CDCl}_3$ ):  $\delta$  195.5, 137.1, 136.3, 132.6, 131.6, 131.5, 129.9, 128.4, 127.4, 14.3, 9.0. **HRMS** (ESI-TOF) calculated for  $\text{C}_{16}\text{H}_{14}\text{O}$   $[\text{M}+\text{H}]^+$  225.1201, found 225.1941.

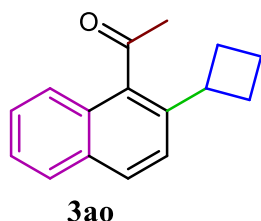

**1-(2-cyclobutyl)naphthalen-1-yl)ethan-1-one (3ao):** General procedure as stated above was followed for the synthesis of **3ao** from 1'-acetonaphthone (0.340 g, 2 mmol, 1 equiv.) and bromocyclobutane (2 mmol, 0.267 g, 1 equiv.). The product was purified by column chromatography (silica gel, gradient elution: 2.5%, 5%, 15% ethyl acetate in hexanes) as a yellow liquid, and 1-(2-cyclobutyl)naphthalen-1-yl)ethan-1-one (0.42g, 85%) was obtained, with a boiling point of 257 °C.  $R_f = 0.52$ ; (TLC in 2.5% ethyl acetate in hexane with three runs and stained with 2,4-DNP.  $^1\text{H NMR}$  (400 MHz,  $\text{CDCl}_3$ ):  $\delta$  8.62 (d,  $J = 8.4$  Hz, 1H), 8.15 (dd,  $J = 7.8, 2.7$  Hz, 2H), 8.04 – 7.97 (m, 1H), 7.68 – 7.55 (m, 2H), 3.55 (m, 1H), 2.73 (s, 3H), 2.59 – 2.41 (m, 1H), 1.29 – 1.06 (m, 1H), 0.65 – 0.57 (m, 2H), 0.36 – 0.27 (m, 2H).  $^{13}\text{C NMR}$  (101 MHz,  $\text{CDCl}_3$ ):  $\delta$  202.2, 135.3, 133.9, 133.2, 129.8, 129.6, 128.9, 128.3, 126.8, 125.9, 125.3, 51.3, 30.5, 14.1, 6.1. **HRMS** (ESI-TOF) calculated for  $\text{C}_{16}\text{H}_{16}\text{O}$   $[\text{M}+\text{Na}]^+$  247.1201, found 247.1095.

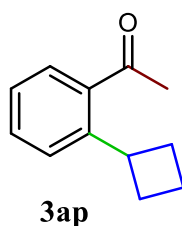

**1-(2-cyclobutylphenyl) ethan-1-one (3ap):** General procedure as stated above was followed for the synthesis of **3ap** from acetophenone (0.240 g, 2 mmol, 1 equiv.) and bromocyclobutane (2 mmol, 0.267 g, 1 equiv.). The product was purified by column chromatography (silica gel, gradient elution: 2.5% to 5% ethyl acetate in hexanes), yielding a yellow liquid of 1-(2-cyclobutylphenyl)ethan-1-one (0.30g, 85%) with a boiling point of 228 °C.  $R_f = 0.32$ ; TLC in 2.5% ethyl acetate in hexane with three runs and stained with 2,4-DNP.  $^1\text{H NMR}$  (400 MHz,  $\text{CDCl}_3$ ):  $\delta$  7.63 (dd,  $J = 7.9, 0.7$  Hz, 1H), 7.48 (dd,  $J = 7.6, 1.7$  Hz, 1H), 7.38 (td,  $J = 7.5, 1.0$  Hz, 1H), 7.33 – 7.27 (m, 1H), 3.45 – 3.43 (m, 1H), 2.64 (s, 3H), 0.90 – 0.85 (m, 2H), 0.65 – 0.57 (m, 2H), 0.36 – 0.27 (m, 2H).  $^{13}\text{C NMR}$  (101 MHz,  $\text{CDCl}_3$ ):  $\delta$  201.2, 141.4, 133.8, 131.7, 128.9, 127.4, 118.8, 30.3, 14.3, 9.0. **HRMS** (ESI-TOF) calculated for  $\text{C}_{12}\text{H}_{14}\text{O}$   $[\text{M}+\text{H}]^+$  174.1509, found 174.1569.



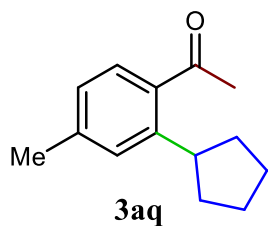

**1-(2-cyclopentyl-4-methylphenyl) ethan-1-one (3aq):** General procedure as stated above was followed for the synthesis of **3aq** from 4-methylacetophenone (0.268 g, 2 mmol, 1 equiv.) and chlorocyclopentane (2 mmol, 0.209 g, 1 equiv.). The product was purified by column chromatography (silica gel, gradient elution: 2.5% to 5% ethyl acetate in hexanes), yielding a yellow, oily liquid of 1-(2-cyclopentyl-4-methylphenyl)ethan-1-one (0.39g, 95%) with a boiling point of 233 °C.  $R_f$  = 0.26; TLC in 2.5% ethyl acetate in hexane with three runs and stained with 2,4-DNP.  $^1\text{H NMR}$  (400 MHz,  $\text{CDCl}_3$ ):  $\delta$  7.19 (s, 1H), 7.12 (d,  $J$  = 7.7 Hz, 1H), 6.98 (d,  $J$  = 2.7 Hz, 1H), 4.51 – 4.43 (m, 1H), 2.35 (s, 3H), 2.32 (s, 3H), 2.15 – 2.05 (m, 4H), 1.98 – 1.87 (m, 2H), 1.76 – 1.60 (m, 2H).  $^{13}\text{C NMR}$  (101 MHz,  $\text{CDCl}_3$ ):  $\delta$  200.9, 136.9, 133.9, 132.7, 130.6, 129.5, 127.3, 53.7, 37.8, 23.23, 20.6, 19.5. **HRMS** (ESI-TOF) calculated for  $\text{C}_{14}\text{H}_{18}\text{O}$   $[\text{M}+\text{H}]^+$  203.1358, found 203.0517.

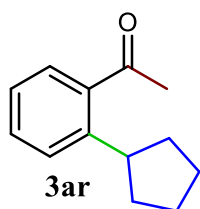

**1-(2-cyclopentylphenyl)ethan-1-one (3ar):** General procedure as stated above was followed for the synthesis of **3ar** from acetophenone (0.240 g, 2 mmol, 1 equiv.) and chlorocyclopentane (2 mmol, 0.209 g, 1 equiv.). The product was purified by column chromatography (silica gel, gradient elution: 2.5% to 5% ethyl acetate in hexanes), yielding a yellow, oily liquid of 1-(2-cyclopentylphenyl)ethan-1-one (0.34g, 90%) with a boiling point of 232 °C.  $R_f$  = 0.52; TLC in 2.5% ethyl acetate in hexane with three runs and stained with 2,4-DNP.  $^1\text{H NMR}$  (400 MHz,  $\text{CDCl}_3$ ):  $\delta$  7.61 (d,  $J$  = 7.9 Hz, 1H), 7.48 (dd,  $J$  = 7.6, 1.7 Hz, 1H), 7.38 (td,  $J$  = 7.5, 0.9 Hz, 1H), 7.35 – 7.28 (m, 1H), 4.49 – 4.43 (m, 1H), 2.64 (s, 3H), 2.12 – 2.04 (m, 4H), 1.95 – 1.86 (m, 2H), 1.72 – 1.60 (m, 2H).  $^{13}\text{C NMR}$  (101 MHz,  $\text{CDCl}_3$ ):  $\delta$  201.3, 141.4, 133.8, 131.7, 128.9, 127.4, 118.9, 53.7, 37.8, 30.3, 23.2. **HRMS** (ESI-TOF) calculated for  $\text{C}_{13}\text{H}_{16}\text{O}$   $[\text{M}+\text{H}]^+$  190.1201, found 190.0466.

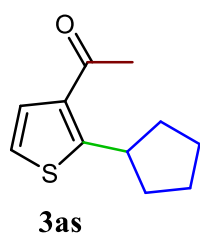

**1-(2-cyclopentylthiophen-3-yl)ethan-1-one (3as):** General procedure as stated above was followed for the synthesis of **3as** from 3-acetylthiophene (0.252 g, 2 mmol, 1 equiv.) and chlorocyclopentane (2 mmol, 0.209 g, 1 equiv.). The product was purified by column chromatography (silica gel, gradient elution: 5%, 10%, 15% ethyl acetate in hexanes), and a yellow liquid, 1-(2-cyclopentylthiophen-3-yl)ethan-1-one (0.35g, 85%), was obtained, boiling at 132 °C.  $R_f$  = 0.26; TLC in 2.5% ethyl acetate in hexane with three runs and stained with 2,4-DNP.  $^1\text{H NMR}$  (400 MHz,  $\text{DMSO}-d_6$ ):  $\delta$  7.76 (d,  $J$  = 3.6 Hz, 1H), 7.70 (d,  $J$  = 3.6 Hz, 1H), 4.52 (dq,  $J$  = 8.9, 3.0 Hz, 1H), 2.09 (s, 3H), 2.01 (ddd,  $J$  = 17.1, 11.6, 5.9 Hz, 2H), 1.85 – 1.70 (m, 4H), 1.62 (td,  $J$  = 7.1, 3.1 Hz, 2H).  $^{13}\text{C NMR}$  (101 MHz,  $\text{DMSO}-d_6$ ):  $\delta$  207.0, 150.9, 142.1, 124.1, 63.1, 37.0, 31.1, 22.9. **HRMS** (ESI-TOF) calculated for  $\text{C}_{11}\text{H}_{14}\text{OS}$   $[\text{M}+\text{H}]^+$  194.0229, found 194.0229.

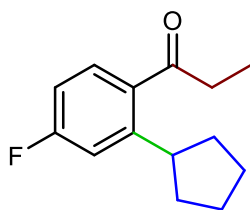

**3at**

**1-(2-cyclopentyl-4-fluorophenyl) propan-1-one (3at):** General procedure as stated above was followed for the synthesis of **3at** from 4-fluoropropiophenone (0.304 g, 2 mmol, 1 equiv.) and chlorocyclopentane (2 mmol, 0.209 g, 1 equiv.). The product was purified by column chromatography (silica gel, gradient elution: 2.5% to 5% ethyl acetate in hexanes), yielding a yellow, oily liquid of 1-(2-cyclopentyl-4-fluorophenyl)propan-1-one (0.37g, 84%) with a boiling point of 245 °C.  $R_f$  = 0.34; TLC in 2.5% ethyl acetate in hexane with three runs and stained with 2,4-DNP.  $^1\text{H NMR}$  (400 MHz,  $\text{CDCl}_3$ ):  $\delta$  8.03 – 8.00 (m, 1H), 8.01 – 7.97 (m, 1H), 7.13 (t,  $J$  = 8.7 Hz, 1H), 4.54 – 4.24 (m, 1H), 2.99 (q,  $J$  = 7.2 Hz, 2H), 2.06 – 1.97 (m, 4H), 1.92 – 1.76 (m, 2H), 1.71 – 1.55 (m, 2H), 1.23 (t,  $J$  = 7.2 Hz, 3H).  $^{13}\text{C NMR}$  (101 MHz,  $\text{CDCl}_3$ ):  $\delta$  199.1, 166.8, 164.3, 133.3 (d,  $J_{\text{C-F}}$  = 3.0 Hz), 130.5 (d,  $J_{\text{C-F}}$  = 9.2 Hz), 115.6, 115.4, 62.0, 37.0, 31.6, 22.9. **HRMS** (ESI-TOF) calculated for  $\text{C}_{14}\text{H}_{17}\text{FO}$   $[\text{M}+\text{H}]^+$  220.1263, found 220.0940.

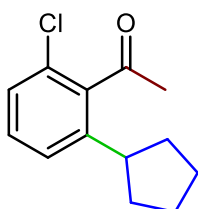

**3au**

**1-(2-chloro-6-cyclopentylphenyl)ethan-1-one (3au):** General procedure as stated above was followed for the synthesis of **3au** from 2-chloroacetophenone (0.309 g, 2 mmol, 1 equiv.) and chlorocyclopentane (2 mmol, 0.209 g, 1 equiv.). The product was purified by column chromatography (silica gel, gradient elution: 2.5% to 5% ethyl acetate in hexanes), yielding a yellow, oily liquid of 1-(2-chloro-6-cyclopentylphenyl)ethan-1-one (0.42g, 86%) with a boiling point of 185 °C.  $R_f$  = 0.26; TLC in 2.5% ethyl acetate in hexane with three runs and stained with 2,4-DNP.  $^1\text{H NMR}$  (400 MHz,  $\text{CDCl}_3$ ):  $\delta$  7.61 (t,  $J$  = 9.9 Hz, 1H), 7.48 (dd,  $J$  = 7.6, 1.7 Hz, 1H), 7.35 – 7.28 (m, 1H), 4.49 – 4.43 (m, 2H), 2.64 (s, 3H), 2.12 – 2.04 (m, 7H), 1.95 – 1.86 (m, 3H), 1.72 – 1.60 (m, 4H).  $^{13}\text{C NMR}$  (101 MHz,  $\text{CDCl}_3$ ):  $\delta$  201.3, 141.4, 133.8, 131.7, 128.9, 127.4, 118.9, 77.3, 77.0, 76.7, 53.7, 37.8, 30.3, 23.2. **HRMS** (ESI-TOF) calculated for  $\text{C}_{13}\text{H}_{15}\text{ClO}$   $[\text{M}+\text{H}]^+$  223.0811, found 223.0840.

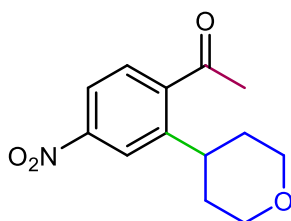

**3av**

**1-(4-nitro-2-(tetrahydro-2H-pyran-4-yl)phenyl)ethan-1-one (3av):** General procedure as stated above was followed for the synthesis of **3av** from 4-nitroacetophenone (0.330 g, 2 mmol, 1 equiv.) and chlorotetrahydro-2H-pyran (2 mmol, 0.241 g, 1 equiv.). The product was purified by column chromatography (silica gel, gradient elution: 2.5%, 5%, 10% ethyl acetate in hexanes), yielding a yellow solid of 1-(4-nitro-2-(tetrahydro-2H-pyran-4-yl)phenyl)ethan-1-one (0.44g, 88%) with a melting point of 251 °C.  $R_f$  = 0.44; TLC in 2.5% ethyl acetate in hexane with three runs and stained with 2,4-DNP.  $^1\text{H NMR}$  (400 MHz,  $\text{CDCl}_3$ ):  $\delta$  7.99 (d,  $J$  = 2.1 Hz, 1H), 7.49 (dd,  $J$  = 8.2, 2.2 Hz, 1H), 7.31 (d,  $J$  = 8.2 Hz, 1H), 4.29 – 4.18 (m, 1H), 4.01 – 3.93 (m, 2H), 3.54 (ddd,  $J$  = 11.6, 8.5, 3.0 Hz, 2H), 2.59 (s, 3H), 2.11 (ddd,  $J$  = 12.6, 4.8, 3.1 Hz, 2H), 1.96 – 1.80 (m, 2H).  $^{13}\text{C NMR}$  (101 MHz,  $\text{CDCl}_3$ ):  $\delta$  196.8, 150.6, 146.7, 130.0, 123.9, 113.9, 109.8, 65.5, 56.0, 55.7, 36.1, 26.1. **HRMS** (ESI-TOF) calculated for  $\text{C}_{13}\text{H}_{15}\text{NO}_4$   $[\text{M}+\text{H}]^+$ : 250.1001; found: 250.0248.

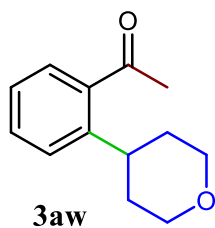

**1-(2-(tetrahydro-2H-pyran-4-yl) phenyl) ethan-1-one (3aw):** General procedure as stated above was followed for the synthesis of **3aw** from acetophenone (0.240 g, 2 mmol, 1 equiv.) and 4-chlorotetrahydro-2H-pyran (2 mmol, 0.241 g, 1 equiv.). The product was purified by column chromatography (silica gel, gradient elution: 2.5% to 5% ethyl acetate in hexanes), yielding a yellow liquid of 1-(2-(tetrahydro-2H-pyran-4-yl)phenyl)ethan-1-one (0.38g, 94%) with a boiling point of 182 °C.  $R_f$  = 0.63; TLC in 2.5% ethyl acetate in hexane with three runs and stained with 2,4-DNP.  $^1\text{H NMR}$  (400 MHz,  $\text{CDCl}_3$ ):  $\delta$  7.63 (dd,  $J$  = 7.9, 0.8 Hz, 1H), 7.48 (dd,  $J$  = 7.6, 1.7 Hz, 1H), 7.38 (td,  $J$  = 7.5, 1.0 Hz, 1H), 7.33 – 7.29 (m, 1H), 4.22 (dt,  $J$  = 12.7, 4.2 Hz, 1H), 4.00 – 3.92 (m, 2H), 3.53 (ddd,  $J$  = 11.6, 8.5, 3.0 Hz, 2H), 2.64 (s, 3H), 2.17 – 2.07 (m, 2H), 1.95 – 1.81 (m, 2H).  $^{13}\text{C NMR}$  (101 MHz,  $\text{CDCl}_3$ ):  $\delta$  201.3, 141.4, 133.8, 131.7, 128.9, 127.4, 118.9, 65.6, 55.8, 36.2, 30.3. **HRMS** (ESI-TOF) calculated for  $\text{C}_{13}\text{H}_{16}\text{O}_2$   $[\text{M}+\text{H}]^+$  205.1150, found 205.1125.

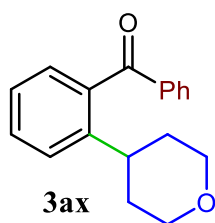

**Phenyl (2-(tetrahydro-2H-pyran-4-yl)phenyl)methanone (3ax):** General procedure as stated above was followed for the synthesis of **3ax** from benzophenone (0.364 g, 2 mmol, 1 equiv.) and 4-chlorotetrahydro-2H-pyran (2 mmol, 0.241 g, 1 equiv.). The product was purified by column chromatography (silica gel, gradient elution: 2.5%, 5%, ethyl acetate in hexanes), yielding a yellow liquid of phenyl(2-(tetrahydro-2H-pyran-4-yl)phenyl)methanone (0.45g, 86%) with a boiling point of 236 °C.  $R_f$  = 0.26; TLC in 2.5% ethyl acetate in hexane with three runs and stained with 2,4-DNP.  $^1\text{H NMR}$  (400 MHz,  $\text{CDCl}_3$ ):  $\delta$  7.79 – 7.75 (m, 2H), 7.70 – 7.65 (m, 2H), 7.65 – 7.61 (m, 2H), 7.59 (d,  $J$  = 7.4 Hz, 1H), 7.49 (t,  $J$  = 7.6 Hz, 2H), 4.20 (dt,  $J$  = 12.7, 4.2 Hz, 1H), 4.01 – 3.89 (m, 2H), 3.51 (ddd,  $J$  = 11.6, 8.5, 3.0 Hz, 2H), 2.17 – 2.04 (m, 2H), 1.92 – 1.80 (m, 2H).  $^{13}\text{C NMR}$  (101 MHz,  $\text{CDCl}_3$ ):  $\delta$  195.5, 137.1, 136.3, 132.6, 131.5, 131.5, 129.9, 128.3, 127.4, 65.5, 55.8, 36.2. **HRMS** (ESI-TOF) calculated for  $\text{C}_{18}\text{H}_{18}\text{O}_2$   $[\text{M}+\text{H}]^+$  267.1307, found 267.0158.

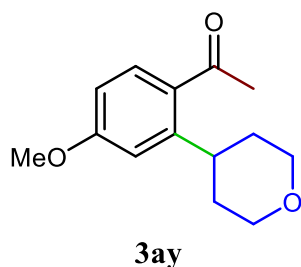

**1-(4-methoxy-2-(tetrahydro-2H-pyran-4-yl) phenyl) ethan-1-one (3ay):** General procedure as stated above was followed for the synthesis of **3ay** from 4-methoxyacetophenone (0.300 g, 2 mmol, 1 equiv.) and 4-chlorotetrahydro-2H-pyran (2 mmol, 0.241 g, 1 equiv.). The product was purified by column chromatography (silica gel, gradient elution: 2.5%, 5%, ethyl acetate in hexanes), and a white solid of 1-(4-methoxy-2-(tetrahydro-2H-pyran-4-yl)phenyl)ethan-1-one (0.41g, 92%) was obtained, with a melting point of 118 °C.  $R_f$  = 0.26; TLC in 2.5% ethyl acetate in hexane with three runs and stained with 2,4-DNP.  $^1\text{H NMR}$  (400 MHz,  $\text{CDCl}_3$ ):  $\delta$  7.53 (dd,  $J$  = 8.2, 2.4 Hz, 2H), 6.92 (s, 1H), 4.24 – 4.14 (m, 2H), 4.03 – 3.87 (m, 3H), 3.56 – 3.44 (m, 1H), 2.55 (s, 3H), 2.12 – 2.05 (m, 2H), 1.93 – 1.81 (m, 2H).  $^{13}\text{C NMR}$  (101 MHz,  $\text{CDCl}_3$ ):  $\delta$  196.8, 150.6, 146.7, 130.0, 123.9, 113.9, 109.8, 65.5, 56.0, 55.7, 36.1, 26.4. **HRMS** (ESI-TOF) calculated for  $\text{C}_{14}\text{H}_{18}\text{O}_3$   $[\text{M}+\text{H}]^+$  225.1201, found 225.1941.

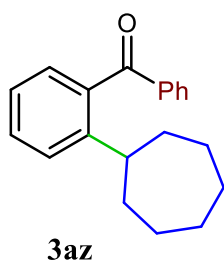

**(2-cycloheptylphenyl)(phenyl)methanone (3az):** General procedure as stated above was followed for the synthesis of **3az** from benzophenone (0.364 g, 2 mmol, 1 equiv.) and chlorocycloheptane (2 mmol, 0.264g, 1 equiv.). The product was purified by column chromatography (silica gel, gradient elution: 2.5%, 5%, ethyl acetate in hexanes), yielding a yellow liquid of (2-cycloheptylphenyl)(phenyl)methanone (0.48g, 86%) with a boiling point of 213 °C.  $R_f$  = 0.26; TLC in 2.5% ethyl acetate in hexane with

three runs and stained with 2,4-DNP.  $^1\text{H NMR}$  (400 MHz,  $\text{CDCl}_3$ ):  $\delta$  7.79 – 7.75 (m, 2H), 7.70 – 7.65 (m, 2H), 7.65 – 7.61 (m, 2H), 7.59 (d,  $J$  = 7.4 Hz, 1H), 7.49 (t,  $J$  = 7.6 Hz, 2H), 4.20 (dt,  $J$  = 12.7, 4.2 Hz, 1H), 4.01 – 3.89 (m, 2H), 3.51 (ddd,  $J$  = 11.6, 8.5, 3.0 Hz, 2H), 2.17 – 2.04 (m, 2H), 1.92 – 1.80 (m, 2H), 1.78 – 1.69 (m, 2H), 1.63 – 1.54 (m, 3H), 1.52 – 1.38 (m, 2H).  $^{13}\text{C NMR}$  (101 MHz,  $\text{CDCl}_3$ ):  $\delta$  195.5, 137.1, 136.0, 132.64, 131.5, 131.5, 129.9, 128.3, 127.4, 63.0, 38.9, 27.6, 23.8. **HRMS** (ESI-TOF) calculated for  $\text{C}_{20}\text{H}_{22}\text{O}$   $[\text{M}+\text{H}]^+$  279.3950, found 279.0876.

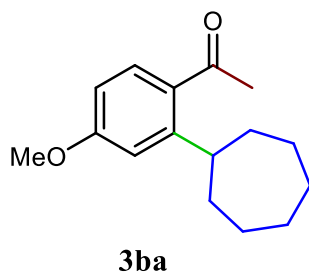

**1-(2-cycloheptyl-4-methoxyphenyl)ethan-1-one (3ba):** General procedure as stated above was followed for the synthesis of **3ba** from 4-methoxyacetophenone (0.300 g, 2 mmol, 1 equiv.) and chlorocycloheptane (2 mmol, 0.264 g, 1 equiv.). The product was purified by column chromatography (silica gel, gradient elution: 2.5% to 5% ethyl acetate in hexanes), and a light-yellow liquid of 1-(2-cycloheptyl-4-methoxyphenyl)ethan-1-one (0.45g, 91%) was

obtained, with a boiling point of 205 °C.  $R_f$  = 0.26; TLC in 2.5% ethyl acetate in hexane with three runs and stained with 2,4-DNP.  $^1\text{H NMR}$  (400 MHz,  $\text{CDCl}_3$ ):  $\delta$  7.55 (d,  $J$  = 8.3, 1H), 6.96 (d,  $J$  = 8.7 Hz, 1H), 6.25 (s, 1H), 4.18 (m, 1H), 3.96 (s, 3H), 2.57 (s, 3H), 2.23 – 2.11 (m, 2H), 1.91 (m, 2H), 1.78 – 1.69 (m, 2H), 1.63 – 1.54 (m, 3H), 1.52 – 1.38 (m, 2H).  $^{13}\text{C NMR}$  (101 MHz,  $\text{CDCl}_3$ ):  $\delta$  196.8, 150.4, 146.6, 130.1, 124.0, 113.8, 109.7, 63.0, 56.0, 38.9, 27.6, 26.1, 23.8. **HRMS** (ESI-TOF) calculated for  $\text{C}_{16}\text{H}_{22}\text{O}_2$   $[\text{M}+\text{H}]^+$  246.1001, found 246.9936.

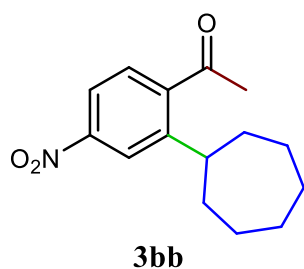

**1-(2-cycloheptyl-4-nitrophenyl)ethan-1-one (3bb):** General procedure as stated above was followed for the synthesis of **3bb** from 4-nitroacetophenone (0.330 g, 2 mmol, 1 equiv.) and chlorocycloheptane (2 mmol, 0.264 g, 1 equiv.). The product was purified by column chromatography (silica gel, gradient elution: 2.5% to 5% ethyl acetate in hexanes), and a light-yellow liquid of 1-(2-cycloheptyl-4-nitrophenyl)ethan-1-one (0.47g, 91%) was

obtained with a boiling point of 221°C.  $R_f$  = 0.25; TLC in 2.5% ethyl acetate in hexane with three runs and stained with 2,4-DNP.  $^1\text{H NMR}$  (400 MHz,  $\text{CDCl}_3$ ):  $\delta$  7.99 (d,  $J$  = 2.1 Hz, 1H), 7.49 (dd,  $J$  = 8.2, 2.2 Hz, 1H), 7.31 (d,  $J$  = 8.2 Hz, 1H), 4.19 (tt,  $J$  = 8.6, 4.3 Hz, 1H), 2.59 (s, 3H), 2.16 (ddd,  $J$  = 12.7, 7.9, 3.9 Hz, 2H), 1.99 – 1.83 (m, 2H), 1.82 – 1.68 (m, 2H), 1.62 – 1.56 (m, 4H), 1.51 – 1.37 (m, 2H).  $^{13}\text{C NMR}$  (101 MHz,  $\text{CDCl}_3$ ):  $\delta$  196.8, 150.4, 146.6, 130.1, 124.0, 113.8,

109.7, 63.0, 56.0, 38.9, 27.6, 26.1, 23.8. **HRMS** (ESI-TOF) calculated for  $C_{15}H_{19}NO_3$   $[M+H]^+$  262.3210, found 262.2516.

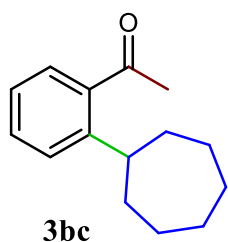

**1-(2-cycloheptylphenyl) ethan-1-one (3bc):** General procedure as stated above was followed for the synthesis of **3bc** from acetophenone (0.240 g, 2 mmol, 1 equiv.) and chlorocycloheptane (2 mmol, 0.264 g, 1 equiv.). The product was purified by column chromatography (silica gel, gradient elution: 2.5% to 5% ethyl acetate in hexanes), yielding a yellow liquid of 1-(2-cycloheptylphenyl)ethan-1-one (0.41g, 95%) with a boiling point of 226

°C.  $R_f$  = 0.43; TLC in 2.5% ethyl acetate in hexane with three runs and stained with 2,4-DNP.

**$^1H$  NMR** (400 MHz,  $CDCl_3$ ):  $\delta$  7.58 (dd,  $J$  = 7.9, 1.0 Hz, 1H), 7.45 (dd,  $J$  = 7.6, 1.8 Hz, 1H), 7.34 (td,  $J$  = 7.5, 1.2 Hz, 1H), 7.27 (td,  $J$  = 7.7, 1.8 Hz, 1H), 4.77 – 3.89 (m, 1H), 2.60 (s, 3H), 2.22 – 2.02 (m, 2H), 1.95 – 1.80 (m, 2H), 1.75 – 1.64 (m, 2H), 1.60 – 1.50 (m, 4H), 1.47 – 1.36 (m, 2H).

**$^{13}C$  NMR** (101 MHz,  $CDCl_3$ ):  $\delta$  201.1, 141.4, 133.8, 131.7, 128.9, 127.4, 118.8, 63.0, 38.8, 30.2, 27.6, 23.7. **HRMS** (ESI-TOF) calculated for  $C_{15}H_{20}O$   $[M+H]^+$  215.1514, found 215.0822.

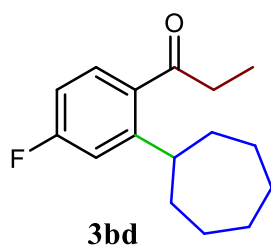

**1-(2-cycloheptyl-4-fluorophenyl) propan-1-one (3bd):** General procedure as stated above was followed for the synthesis of **3bd** from 4-fluoropropiophenone (0.304 g, 2 mmol, 1 equiv.) and chlorocycloheptane (2 mmol, 0.264 g, 1 equiv.). The product was purified by column chromatography (silica gel, gradient elution: 2.5%, 5%, ethyl acetate in hexanes), and a pale-yellow liquid of 1-(2-cycloheptyl-4-fluorophenyl) propan-1-one (0.48g, 86%) was obtained, with a boiling point of 240 °C.  $R_f$  = 0.25; TLC in 2.5% ethyl acetate in hexane with three runs and stained with 2,4-DNP.

**$^1H$  NMR** (400 MHz,  $CDCl_3$ ):  $\delta$  8.03 – 8.00 (m, 1H), 7.99 (s, 1H), 7.14 (t,  $J$  = 8.7 Hz, 1H), 4.18 (tt,  $J$  = 8.6, 4.3 Hz, 1H), 2.99 (q,  $J$  = 7.2 Hz, 2H), 2.21 – 2.12 (m, 2H), 1.98 – 1.86 (m, 2H), 1.78 – 1.69 (m, 2H), 1.61 – 1.55 (m, 4H), 1.50 – 1.41 (m, 2H), 1.23 (t,  $J$  = 7.2 Hz, 3H).  **$^{13}C$  NMR** (101 MHz,  $CDCl_3$ ):  $\delta$  199.1, 165.61 (d,  $J_{C-F}$  = 254.2 Hz), 133.33 (d,  $J_{C-F}$  = 3.0 Hz), 130.55 (d,  $J_{C-F}$  = 9.2 Hz), 115.60 (d,  $J_{C-F}$  = 21.8 Hz), 115.7, 63.1, 38.9, 31.7, 27.6, 23.8. **HRMS** (ESI-TOF) calculated for  $C_{16}H_{21}FO$   $[M+H]^+$ : 250.1576; found: 250.0248.

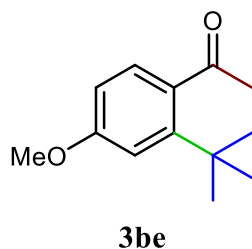

**1-(2-(tert-butyl)-4-methoxyphenyl)ethan-1-one (3be):** General procedure as stated above was followed for the synthesis of **3be** from 4-methoxyacetophenone (0.300 g, 2 mmol, 1 equiv.) and 2-Chloro-2-methylpropane (2 mmol, 0.185 g, 1 equiv.). The product was purified by column chromatography (silica gel, gradient elution: 2.5% to 5% ethyl acetate in hexanes), yielding a yellow liquid of 1-(2-(tert-butyl)-4-methoxyphenyl) ethanone (0.37g, 92%) with a boiling point of 245 °C.  $R_f$  = 0.41; TLC in 2.5% ethyl acetate in hexane with three runs and stained with 2,4-DNP.

**$^1H$  NMR** (400 MHz,  $CDCl_3$ ):  $\delta$  7.56 (d,  $J$  = 8.3 Hz, 1H), 6.97 (d,  $J$  = 8.7 Hz, 1H), 6.11 (s, 1H), 3.97 (s, 3H), 2.58 (s, 3H), 1.64 (s,

9H). **<sup>13</sup>C NMR** (101 MHz, CDCl<sub>3</sub>): δ 196.7, 150.3, 146.6, 130.2, 123.9, 113.7, 109.6, 67.4, 56.0, 34.4, 26.1. **HRMS** (ESI-TOF) calculated for C<sub>13</sub>H<sub>18</sub>O<sub>2</sub> [M+H]<sup>+</sup> 206.1307, found 206.1299.

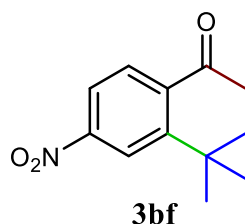

**1-(2-(tert-butyl)-4-nitrophenyl)ethan-1-one (3bf):** General procedure as stated above was followed for the synthesis of **3bf** from 4-nitroacetophenone (0.330 g, 2 mmol, 1 equiv.) and 2-chloro-2-methylpropane (2 mmol, 0.185 g, 1 equiv.). The product was purified by column chromatography (silica gel, gradient elution: 2.5%, 5%, 15% ethyl acetate in hexanes), yielding a yellow solid of 1-(2-(tert-butyl)-4-nitrophenyl)ethan-1-one (0.34g, 84%) with a melting point of 156 °C. *R<sub>f</sub>* = 0.30; TLC in 2.5% ethyl acetate in hexane with three runs and stained with 2,4-DNP. **<sup>1</sup>H NMR** (400 MHz, CDCl<sub>3</sub>): δ 7.50 (dd, *J* = 8.2, 2.2 Hz, 1H), 6.98 (d, *J* = 8.2 Hz, 1H), 6.10 (s, 1H), 3.97 (s, 3H), 2.58 (s, 3H), 1.64 (s, 9H). **<sup>13</sup>C NMR** (101 MHz, CDCl<sub>3</sub>): δ 196.7, 150.3, 146.6, 130.2, 123.9, 113.7, 109.6, 56.0, 34.4, 26.1. **HRMS** (ESI-TOF) calculated for C<sub>12</sub>H<sub>15</sub>NO<sub>3</sub> [M+H]<sup>+</sup> 221.2560, found 221.1095.

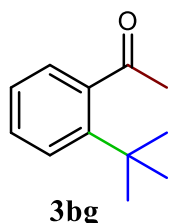

**1-(2-(tert-butyl)phenyl)ethan-1-one (3bg):** General procedure as stated above was followed for the synthesis of **3bg** from acetophenone (0.240 g, 2 mmol, 1 equiv.) and 2-chloro-2-methylpropane (2 mmol, 0.184 g, 1 equiv.). The product was purified by column chromatography (silica gel, gradient elution: 2.5% to 5% ethyl acetate in hexanes), yielding a yellow liquid of 1-(2-(tert-butyl)phenyl)ethan-1-one (0.33g, 92%) with a boiling point of 226 °C. *R<sub>f</sub>* = 0.5; TLC in 2.5% ethyl acetate in hexane with three runs and stained with 2,4-DNP. **<sup>1</sup>H NMR** (400 MHz, CDCl<sub>3</sub>): δ 7.61 (dd, *J* = 7.9, 1.1 Hz, 1H), 7.47 (dd, *J* = 7.6, 1.8 Hz, 1H), 7.37 (td, *J* = 7.5, 1.2 Hz, 1H), 7.29 (td, *J* = 7.7, 1.8 Hz, 1H), 2.63 (s, 3H), 1.62 (s, 9H). **<sup>13</sup>C NMR** (101 MHz, CDCl<sub>3</sub>): δ 201.2, 141.4, 133.8, 131.7, 128.9, 127.4, 118.8, 67.4, 34.4, 30.3. **HRMS** (ESI-TOF) calculated for C<sub>12</sub>H<sub>16</sub>O [M+H]<sup>+</sup> 178.1201, found 178.1305.

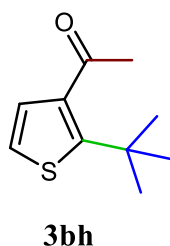

**1-(2-(tert-butyl)thiophen-3-yl)ethan-1-one (3bh):** General procedure as stated above was followed for the synthesis of **3bh** from 1-(thiophen-3-yl)ethan-1-one (0.252 g, 2 mmol, 1 equiv.) and 2-chloro-2-methylpropane (2 mmol, 0.184 g, 1 equiv.). The product was purified by column chromatography (silica gel, gradient elution: 2.5% to 5% ethyl acetate in hexanes), and an oily liquid, 1-(2-(tert-butyl)thiophen-3-yl)ethan-1-one (0.30g, 85%), was obtained with a boiling point of 245 °C. *R<sub>f</sub>* = 0.43; TLC in 2.5% ethyl acetate in hexane with three runs and stained with 2,4-DNP. **<sup>1</sup>H NMR** (400 MHz, CDCl<sub>3</sub>): δ 7.59 (d, *J* = 3.6 Hz, 1H), 7.26 (d, *J* = 3.6 Hz, 1H), 2.18 (s, 3H), 1.63 (s, 9H). **<sup>13</sup>C NMR** (101 MHz, CDCl<sub>3</sub>): δ 206.9, 152.0, 141.6, 121.1, 34.4, 30.9. **HRMS** (ESI-TOF) calculated for C<sub>10</sub>H<sub>14</sub>OS [M+H]<sup>+</sup> 183.0765, found 183.0823.



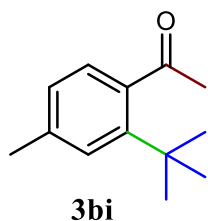

**1-(2-(*tert*-butyl)-4-methylphenyl)ethan-1-one (3bi):** General procedure as stated above was followed for the synthesis of **3bi** from 4-methylacetophenone (0.268 g, 2 mmol, 1 equiv.) and 2-Chloro-2-methylpropane (2 mmol, 0.185 g, 1 equiv.). The product was purified by column chromatography (silica gel, gradient elution: 2.5% to 5% ethyl acetate in hexanes), yielding a yellow liquid of 1-(2-(*tert*-butyl)-4-methylphenyl)ethan-1-one (0.32g, 85%) with a boiling point of 245 °C.  $R_f$  = 0.41; TLC in 2.5% ethyl acetate in hexane with three runs and stained with 2,4-DNP.  $^1\text{H NMR}$  (400 MHz, DMSO):  $\delta$  7.22 (s, 1H), 7.20 (s, 1H), 7.04 (d,  $J$  = 7.6 Hz, 1H), 2.27 (s, 3H), 2.26 (s, 3H), 1.60 (s, 3H).  $^{13}\text{C NMR}$  (101 MHz, DMSO):  $\delta$  198.4, 137.5, 133.3, 132.5, 131.3, 129.5, 128.2, 34.5, 20.6, 19.5. **HRMS** (ESI-TOF) calculated for  $\text{C}_{13}\text{H}_{18}\text{O}$   $[\text{M}+\text{H}]^+$  190.1358, found 190.1466.

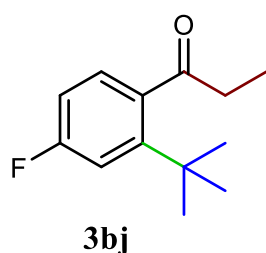

**1-(2-(*tert*-butyl)-4-fluorophenyl)propan-1-one (3bj):** General procedure as stated above was followed for the synthesis of **3bj** from 4-fluoropropiophenone (0.304 g, 2 mmol, 1 equiv.) and 2-chloro-2-methylpropane (2 mmol, 0.185 g, 1 equiv.). The product was purified by column chromatography (silica gel, gradient elution: 5%, 10%, 15% ethyl acetate in hexanes), and a yellow liquid, 1-(2-(*tert*-butyl)-4-fluorophenyl)propan-1-one (0.34g, 87%), was obtained with a boiling point of 257 °C.  $R_f$  = 0.52; TLC in 2.5% ethyl acetate in hexane with three runs and stained with 2,4-DNP.  $^1\text{H NMR}$  (400 MHz,  $\text{CDCl}_3$ ):  $\delta$  8.04 – 8.01 (m, 1H), 8.01 – 7.98 (m, 1H), 7.14 (t,  $J$  = 8.6 Hz, 1H), 3.00 (q,  $J$  = 7.2 Hz, 2H), 1.64 (s, 9H), 1.24 (t,  $J$  = 7.2 Hz, 3H).  $^{13}\text{C NMR}$  (101 MHz,  $\text{CDCl}_3$ ):  $\delta$  199.1, 165.62 (d,  $J_{\text{C-F}}$  = 254.2 Hz), 133.3 (d,  $J_{\text{C-F}}$  = 3.0 Hz), 130.5 (d,  $J_{\text{C-F}}$  = 9.3 Hz), 115.7, 115.5, 34.4, 31.7, 8.2.  $^{19}\text{F NMR}$  (377 MHz,  $\text{CDCl}_3$ )  $\delta$  -105.45 – -106.17 (m). **HRMS** (ESI-TOF) calculated for  $\text{C}_{12}\text{H}_{15}\text{FO}$   $[\text{M}+\text{H}]^+$  194.011, found 194.1101.

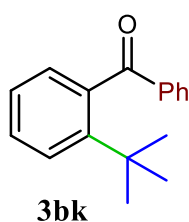

**(2-(*tert*-butyl)phenyl)(phenyl)methanone (3bk):** General procedure as stated above was followed for the synthesis of **3bk** from benzophenone (0.364 g, 2 mmol, 1 equiv.) and 2-chloro-2-methylpropane (2 mmol, 0.185 g, 1 equiv.). The product was purified by column chromatography (silica gel, gradient elution: 2.5%, 5%, 10% ethyl acetate in hexanes), yielding a yellow liquid of (2-(*tert*-butyl)phenyl)(phenyl)methanone (0.40g, 83%) with a boiling point of 125 °C.  $R_f$  = 0.52; TLC in 2.5% ethyl acetate in hexane with three runs and stained with 2,4-DNP.  $^1\text{H NMR}$  (400 MHz,  $\text{CDCl}_3$ ):  $\delta$  7.83 – 7.76 (m, 2H), 7.73 – 7.68 (m, 2H), 7.67 – 7.65 (m, 1H), 7.65 – 7.60 (m, 2H), 7.54 – 7.48 (m, 2H), 1.62 (s, 9H).  $^{13}\text{C NMR}$  (101 MHz,  $\text{CDCl}_3$ ):  $\delta$  195.3, 137.1, 136.8, 136.3, 133.2, 132.6, 131.6, 131.5, 129.9, 128.4, 127.5, 34.4, 30.3. **HRMS** (ESI-TOF) calculated for  $\text{C}_{17}\text{H}_{18}\text{O}$   $[\text{M}+\text{H}]^+$  238.3300, found 238.3303.

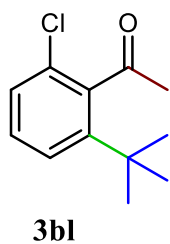

**1-(2-(*tert*-butyl)-6-chlorophenyl)ethan-1-one (3bl):** General procedure as stated above was followed for the synthesis of **3bl** from 2-chloroacetophenone (0.309 g, 2 mmol, 1 equiv.) and 2-methylpropane (2 mmol, 0.185 g, 1 equiv.). The product was purified by column chromatography (silica gel, gradient elution: 5%, 10%, 15% ethyl acetate in hexanes), yielding a yellow liquid of 1-(2-(*tert*-butyl)-6-chlorophenyl)ethan-1-one (0.30g, 80%) with a boiling point of 256 °C.  $R_f$  = 0.26; TLC in 2.5% ethyl acetate in hexane with three runs and stained with 2,4-DNP.  $^1\text{H NMR}$  (400 MHz,  $\text{CDCl}_3$ ):  $\delta$  7.61 (t,  $J$  = 9.9 Hz, 1H), 7.48 (dd,  $J$  = 7.6, 1.7 Hz, 1H), 7.35 – 7.28 (m, 1H), 2.62 (s, 3H), 1.62 (s, 9H).  $^{13}\text{C NMR}$  (101 MHz,  $\text{CDCl}_3$ ):  $\delta$  201.2, 141.4, 133.8, 131.7, 128.9, 127.4, 118.8, 67.4, 34.4, 30.3. **HRMS** (ESI-TOF) calculated for  $\text{C}_{12}\text{H}_{15}\text{ClO}$   $[\text{M}+\text{H}]^+$  225.1201, found 225.1221.

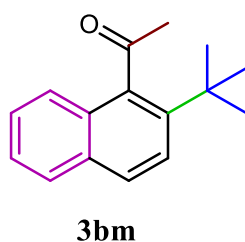

**1-(2-(*tert*-butyl)naphthalen-1-yl)ethan-1-one (3bm):** General procedure as stated above was followed for the synthesis of **3bm** from 1'-acetonaphthone (0.340 g, 2 mmol, 1 equiv.) and 2-chloro-2-methylpropane (2 mmol, 0.185 g, 1 equiv.). The product was purified by column chromatography (silica gel, gradient elution: 5%, 10%, 15% ethyl acetate in hexanes), and yellow liquid 1-(2-(*tert*-butyl)naphthalen-1-yl)ethan-1-one (0.40g, 89%) was obtained, with a boiling point of 257 °C.  $R_f$  = 0.52; TLC in 2.5% ethyl acetate in hexane with three runs and stained with 2,4-DNP.  $^1\text{H NMR}$  (400 MHz,  $\text{CDCl}_3$ ):  $\delta$  8.78 (d,  $J$  = 8.6 Hz, 1H), 8.04 – 7.95 (m, 1H), 7.90 (d,  $J$  = 8.0 Hz, 1H), 7.63 (ddd,  $J$  = 8.5, 6.9, 1.4 Hz, 1H), 7.58 – 7.48 (m, 2H), 2.77 (s, 3H), 1.65 (s, 9H).  $^{13}\text{C NMR}$  (101 MHz,  $\text{CDCl}_3$ ):  $\delta$  201.8, 135.4, 133.99, 133.0, 130.1, 128.6, 128.4, 128.0, 126.4, 126.0, 124.3, 67.5, 34.4, 30.0. **HRMS** (ESI-TOF) calculated for  $\text{C}_{16}\text{H}_{18}\text{O}$   $[\text{M}+\text{H}]^+$  227.1358, found 227.0902.

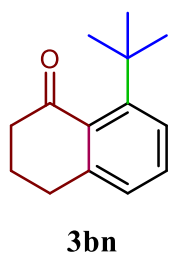

**8-(*tert*-butyl)-3,4-dihydronaphthalen-1(2H)-one (3bn):** General procedure as stated above was followed for the synthesis of **3bn** from  $\alpha$ -tetralone (0.292 g, 2 mmol) and 2-chloro-2-methylpropane (2 mmol, 0.185 g, 1 equiv.). The product was purified by column chromatography (silica gel, gradient elution: 2.5%, 5%, 10% ethyl acetate in hexanes), yielding a yellow liquid of 8-(*tert*-butyl)-3,4-dihydronaphthalen-1(2H)-one (0.39g, 85%) with a boiling point of 155 °C.  $R_f$  = 0.60; TLC in 2.5% ethyl acetate in hexane with three runs and stained with 2,4-DNP.  $^1\text{H NMR}$  (400 MHz,  $\text{CDCl}_3$ ):  $\delta$  8.04 (d,  $J$  = 7.8 Hz, 1H), 7.47 (m, 1H), 7.33 – 7.26 (m, 1H), 2.97 (t,  $J$  = 6.1 Hz, 2H), 2.73 – 2.62 (m, 2H), 2.15 (dt,  $J$  = 12.7, 6.4 Hz, 2H), 1.63 (s, 9H).  $^{13}\text{C NMR}$  (101 MHz,  $\text{CDCl}_3$ ):  $\delta$  198.3, 144.4, 133.3, 132.6, 128.7, 127.1, 126.6, 67.4, 39.1, 34.4, 29.7, 23.2. **HRMS** (ESI-TOF) calculated for  $\text{C}_{14}\text{H}_{18}\text{O}$   $[\text{M}+\text{H}]^+$  203.1358, found 203.1350.



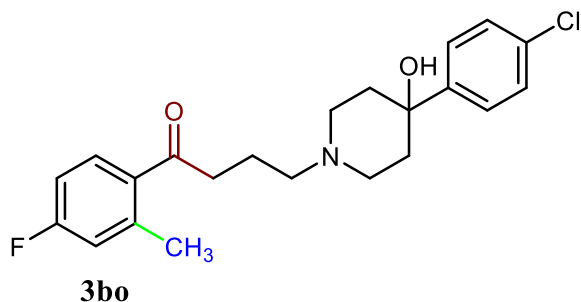

**4-(4-(4-chlorophenyl)-4-hydroxypiperidin-1-yl)-1-(4-fluoro-2-methylphenyl)butan-1-one (3bo)**

The general procedure stated above was followed for the synthesis of **3bo** from haloperidol (0.751 g, 2 mmol) and methyl iodide (2 mmol, 0.283 g, 1 equiv.). The

product was purified by column chromatography (silica gel, gradient elution 2.5%, 5%, 10% ethyl acetate in hexanes) and a colourless solid of 4-(4-(4-chlorophenyl)-4-hydroxypiperidin-1-yl)-1-(4-fluoro-2-methylphenyl)butan-1-one was obtained (0.61g, 79%) with melting point of 155 °C.  $R_f$  = 0.60; TLC in 5%, 10 % ethyl acetate in hexane with three runs and stained with 2,4-DNP.  $^1\text{H NMR}$  (400 MHz,  $\text{CDCl}_3$ ): 7.91 (m, 2H), 7.53 (dt,  $J$  = 23.5, 11.8 Hz, 2H), 7.27 (d,  $J$  = 9.3 Hz, 1H), 7.08 (dd,  $J$  = 26.6, 18.3 Hz, 2H), 4.27 (s, 1H), 3.91 (t,  $J$  = 12.2 Hz, 1H), 3.60 (m, 4H), 3.37 – 3.10 (m, 4H), 3.22 – 2.89 (m, 1H), 2.17 (s, 3H), 2.07 – 1.81 (m, 1H).  $^{13}\text{C NMR}$  (101 MHz,  $\text{CDCl}_3$ ):  $\delta$  196.8, 165.5 (d,  $J_{\text{C-F}}$  = 254.3 Hz), 146.9, 133.7 (d,  $J_{\text{C-F}}$  = 3.1 Hz), 132.7, 130.6 (d,  $J_{\text{C-F}}$  = 9.2 Hz), 128.3, 126.0, 115.5 (d,  $J_{\text{C-F}}$  = 21.8 Hz), 115.8, 77.4, 77.0, 76.7, 68.4, 68.3, 67.6, 57.6, 45.1, 34.4, 32.6, 16.7. **HRMS** (ESI-TOF) calculated for  $\text{C}_{23}\text{H}_{26}\text{O}_2\text{ClF}$   $[\text{M}+\text{H}]^+$  388.1838, found 388.1809.

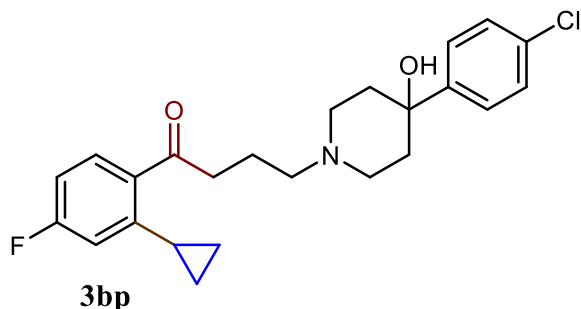

**4-(4-(4-chlorophenyl)-4-hydroxypiperidin-1-yl)-1-(2-cyclopropyl-4-fluorophenyl)butan-1-one (3bp)**

The general procedure stated above was followed for the synthesis of **3bp** from haloperidol (0.751 g, 2 mmol) and bromocyclopropane (2 mmol, 0.241 g, 1 equiv.). The product was purified by column

chromatography (silica gel, gradient elution 2.5%, 5%, 10% ethyl acetate in hexanes) and colourless solid of 4-(4-(4-chlorophenyl)-4-hydroxypiperidin-1-yl)-1-(2-cyclopropyl-4-fluorophenyl)butan-1-one was obtained (0.66g, 81%) with melting point of 187 °C.  $R_f$  = 0.60; TLC in 5%, 10 % ethyl acetate in hexane with three runs and stained with 2,4-DNP.  $^1\text{H NMR}$  (400 MHz,  $\text{CDCl}_3$ ):  $\delta$  8.03 (dd,  $J$  = 8.5, 5.6 Hz, 2H), 7.39 (d,  $J$  = 8.5 Hz, 2H), 7.33 – 7.27 (m, 1H), 7.15 (t,  $J$  = 8.5 Hz, 2H), 3.00 (t,  $J$  = 7.0 Hz, 2H), 2.88 (tt,  $J$  = 7.3, 3.8 Hz, 1H), 2.80 (d,  $J$  = 11.5 Hz, 2H), 2.54 – 2.38 (m, 4H), 2.00 (dt,  $J$  = 14.1, 7.1 Hz, 4H), 1.68 (d,  $J$  = 12.5 Hz, 2H), 1.04 – 0.93 (m, 2H), 0.93 – 0.78 (m, 2H).  $^{13}\text{C NMR}$  (101 MHz,  $\text{CDCl}_3$ ):  $\delta$  198.2, 165.5 (d,  $J_{\text{C-F}}$  = 254.3 Hz), 146.9, 133.7 (d,  $J_{\text{C-F}}$  = 3.1 Hz), 132.7, 130.6 (d,  $J_{\text{C-F}}$  = 9.2 Hz), 128.3, 126.0, 115.5 (d,  $J_{\text{C-F}}$  = 21.8 Hz), 71.0, 57.8, 49.3, 38.3, 36.2, 21.9, 14.3, 9.0, 1.0. **HRMS** (ESI-TOF) calculated for  $\text{C}_{25}\text{H}_{28}\text{O}_2\text{ClF}$   $[\text{M}+\text{H}]^+$  415.1835, found 415.1846.

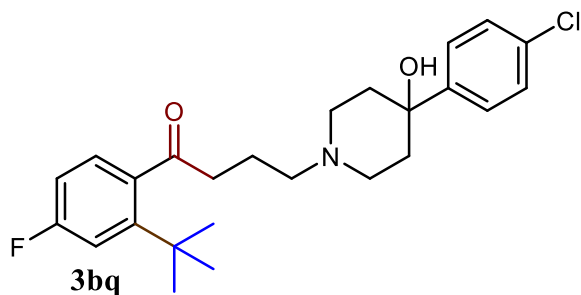

**1-(2-(tert-butyl)-4-fluorophenyl)-4-(4-(4-chlorophenyl)-4-hydroxypiperidin-1-yl)butan-1-one (3bq)**

The general procedure stated above was followed for the synthesis of **3bq** from haloperidol (0.751 g, 2 mmol) and *tert*-butyl chloride (2 mmol, 0.185 g, 1 equiv.). The

product was purified by column chromatography (silica gel, gradient elution 2.5%, 5%, 10% ethyl acetate in hexanes) and colourless solid of 1-(2-(*tert*-butyl)-4-fluorophenyl)-4-(4-(4-chlorophenyl)-4-hydroxypiperidin-1-yl)butan-1-one was obtained (0.70g, 80%) with melting point of 136 °C.  $R_f$  = 0.60; TLC in 5%, 10 % ethyl acetate in hexane with three runs and stained with 2,4-DNP.  $^1\text{H NMR}$  (400 MHz,  $\text{CDCl}_3$ ):  $\delta$  8.03 (dd,  $J$  = 8.4, 5.6 Hz, 2H), 7.40 (d,  $J$  = 8.5 Hz, 2H), 7.36 – 7.25 (m, 1H), 7.15 (t,  $J$  = 8.5 Hz, 2H), 3.00 (t,  $J$  = 7.0 Hz, 2H), 2.81 (d,  $J$  = 11.3 Hz, 2H), 2.54 – 2.37 (m, 4H), 2.01 (dt,  $J$  = 13.1, 6.5 Hz, 4H), 1.64 (s, 9H), 1.28 (d,  $J$  = 5.2 Hz, 1H).  $^{13}\text{C NMR}$  (101 MHz,  $\text{CDCl}_3$ ):  $\delta$  198.2, 165.5 (d,  $J_{\text{C-F}}$  = 254.3 Hz), 146.92, 133.7 (d,  $J_{\text{C-F}}$  = 3.1 Hz), 132.7, 130.6 (d,  $J_{\text{C-F}}$  = 9.2 Hz), 128.3, 126.0, 115.5 (d,  $J_{\text{C-F}}$  = 21.8 Hz), 71.0, 67.4, 57.8, 49.3, 38.3, 36.2, 34.4, 21.8. **HRMS** (ESI-TOF) calculated for  $\text{C}_{14}\text{H}_{18}\text{O}$   $[\text{M}+\text{NH}_4]^+$  448.2413, found 448.2401.

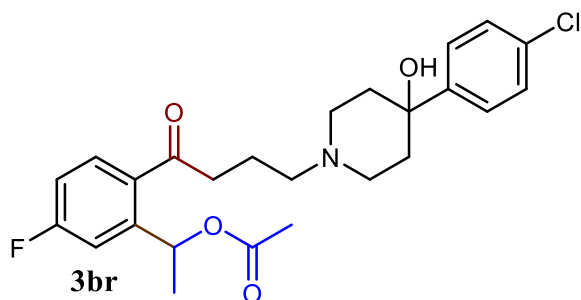

**1-(2-(4-(4-(4-chlorophenyl)-4-hydroxypiperidin-1-yl)butanoyl)-5-fluorophenyl)ethyl acetate (3br)**

General procedure as stated above was followed for the synthesis of **3br** from haloperidol (0.751 g, 2 mmol) and 2-bromo-methylpropionate (2 mmol, 0.334 g, 1 equiv.).

The product was purified by column chromatography (silica gel, gradient elution 2.5%, 5%, 10% ethyl acetate in hexanes) and colourless solid of 1-(2-(4-(4-(4-chlorophenyl)-4-hydroxypiperidin-1-yl)butanoyl)-5-fluorophenyl)ethyl acetate was obtained (0.77g, 78%) with melting point of 136 °C.  $R_f$  = 0.60; TLC in 5%, 10 % ethyl acetate in hexane with three runs and stained with 2,4-DNP.  $^1\text{H NMR}$  (400 MHz,  $\text{CDCl}_3$ ):  $\delta$  8.08 – 7.98 (m, 2H), 7.57 (dd,  $J$  = 21.0, 8.6 Hz, 1H), 7.45 – 7.39 (m, 1H), 7.34 – 7.28 (m, 2H), 7.18 – 7.11 (m, 2H), 4.71 (d,  $J$  = 7.5 Hz, 1H), 4.05 (s, 1H), 3.97 (d,  $J$  = 8.8 Hz, 1H), 3.92 (d,  $J$  = 7.8 Hz, 1H), 3.89 (s, 1H), 3.85 (s, 3H), 3.80 (s, 3H), 3.06 (dd,  $J$  = 15.2, 8.3 Hz, 3H), 2.72 (s, 2H), 2.25 (d,  $J$  = 14.8 Hz, 1H), 2.15 – 2.01 (m, 1H), 1.79 (d,  $J$  = 12.9 Hz, 1H).  $^{13}\text{C NMR}$  (101 MHz,  $\text{CDCl}_3$ ):  $\delta$  197.8, 167.7, 165.5 (d,  $J_{\text{C-F}}$  = 254.3 Hz), 146.9, 133.7 (d,  $J_{\text{C-F}}$  = 3.1 Hz), 132.7, 130.6 (d,  $J_{\text{C-F}}$  = 9.2 Hz), 128.3, 126.0, 115.5 (d,  $J_{\text{C-F}}$  = 21.8 Hz), 115.6, 77.3, 77.0, 77.7, 67.9, 57.3, 53.1, 49.0, 37.3, 36.0, 25.5, 20.6. **HRMS** (ESI-TOF) calculated for  $\text{C}_{25}\text{H}_{29}\text{ClFNO}_4$   $[\text{M}]^+$ : 461.9584; found: 461.9374.

**4-(4-(4-chlorophenyl)-4-hydroxypiperidin-1-yl)-1-(4-fluoro-2-(2-hydroxyethyl)phenyl)butan-1-one (3bs)**

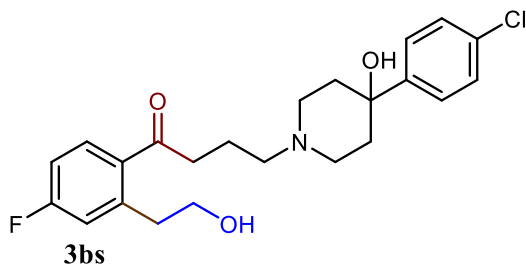

The general procedure stated above was followed for the synthesis of **3bs** from haloperidol (0.751 g, 2 mmol) and 2-bromoethanol (2 mmol, 0.249 g, 1 equiv.). The product was purified by column chromatography (silica gel, gradient elution 2.5%, 5%, 10% ethyl acetate in hexanes) and a colourless solid of 4-(4-(4-chlorophenyl)-4-hydroxypiperidin-1-yl)-1-(4-fluoro-2-(2-hydroxyethyl)phenyl)butan-1-one was obtained

(0.79g, 76%) with melting point of 136 °C.  $R_f$  = 0.60; TLC in 5%, 10 % ethyl acetate in hexane with three runs and stained with 2,4-DNP.  $^1\text{H NMR}$  (400 MHz,  $\text{CDCl}_3$ ):  $\delta$  8.06 – 7.99 (m, 2H), 7.45 – 7.38 (m, 2H), 7.34 – 7.29 (m, 1H), 7.15 (t,  $J$  = 8.6 Hz, 2H), 3.97 – 3.89 (m, 2H), 3.87 – 3.80 (m, 1H), 3.74 – 3.69 (m, 1H), 3.69 – 3.63 (m, 1H), 3.58 – 3.53 (m, 1H), 3.07 (t,  $J$  = 6.9 Hz, 2H), 2.68 (dd,  $J$  = 17.9, 10.2 Hz, 2H), 2.33 – 2.20 (m, 3H), 2.09 (dt,  $J$  = 14.1, 6.9 Hz, 2H), 1.77 (d,  $J$  = 12.2 Hz, 2H).  $^{13}\text{C NMR}$  (101 MHz,  $\text{CDCl}_3$ ):  $\delta$  198.2, 165.5 (d,  $J_{\text{C-F}}$  = 254.3 Hz), 146.9, 133.7 (d,  $J_{\text{C-F}}$  = 3.1 Hz), 132.7, 130.6 (d,  $J_{\text{C-F}}$  = 9.2 Hz), 128.3, 126.0, 115.5 (d,  $J_{\text{C-F}}$  = 21.8 Hz), 77.3, 77.2, 77.0, 76.7, 72.1, 70.9, 70.6, 67.0, 62.7, 61.6, 57.5, 49.2, 37.4, 36.0, 35.8, 29.5, 20.8.

HRMS (ESI-TOF) calculated for  $\text{C}_{23}\text{H}_{27}\text{ClFNO}_3$   $[\text{M}]^+$  419.9214, found 419.9013.

#### 4-(4-(4-chlorophenyl)-4-hydroxypiperidin-1-yl)-1-(2-ethynyl-4-fluorophenyl)butan-1-one (3bt)

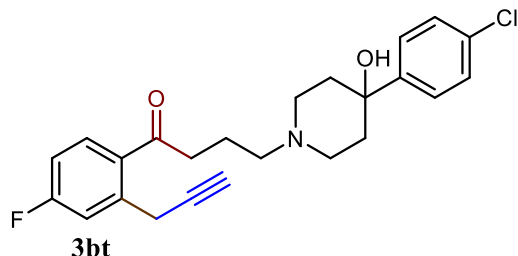

General procedure as stated above was followed for the synthesis of **3bt** from haloperidol (0.751 g, 2 mmol) and *tert*-butyl chloride (2 mmol, 0.209 g, 1 equiv.). The product was purified by column chromatography (silica gel, gradient elution 2.5%, 5%, 10% ethyl acetate in hexanes) and a colourless solid of 4-(4-(4-chlorophenyl)-4-hydroxypiperidin-1-yl)-1-(2-ethynyl-4-fluorophenyl)butan-1-one was obtained

(0.70g, 78%) with a melting point of 136 °C.  $R_f$  = 0.60; TLC in 5%, 10 % ethyl acetate in hexane with three runs and stained with 2,4-DNP.  $^1\text{H NMR}$  (400 MHz,  $\text{CDCl}_3$ ):  $\delta$  8.05 – 7.98 (m, 1H), 7.96 – 7.90 (m, 1H), 7.62 (d,  $J$  = 8.6 Hz, 1H), 7.55 (d,  $J$  = 8.6 Hz, 1H), 7.43 – 7.37 (m, 1H), 7.32 – 7.23 (m, 1H), 7.18 – 7.08 (m, 1H), 5.27 (d,  $J$  = 23.2 Hz, 1H), 4.66 (dd,  $J$  = 11.7, 1.7 Hz, 1H), 4.21 – 4.13 (m, 1H), 4.11 – 4.04 (m, 1H), 3.89 (d,  $J$  = 2.6 Hz, 1H), 3.80 – 3.61 (m, 1H), 3.29 (t,  $J$  = 6.0 Hz, 1H), 3.16 (t,  $J$  = 6.4 Hz, 1H), 3.03 (dt,  $J$  = 14.1, 4.6 Hz, 1H), 2.91 (t,  $J$  = 2.2 Hz, 1H), 2.54 (t,  $J$  = 2.6 Hz, 2H), 2.51 – 2.43 (m, 1H), 2.35 – 2.25 (m, 2H), 2.24 – 2.13 (m, 1H), 2.09 – 1.87 (m, 1H).  $^{13}\text{C NMR}$  (101 MHz,  $\text{CDCl}_3$ ):  $\delta$  197.0, 165.5 (d,  $J_{\text{C-F}}$  = 254.3 Hz), 146.9, 133.3 (d,  $J_{\text{C-F}}$  = 3.1 Hz), 132.7, 130.6 (d,  $J_{\text{C-F}}$  = 9.2 Hz), 128.3, 126.0, 115.5 (d,  $J_{\text{C-F}}$  = 21.8 Hz), 115.7, 115.5, 82.2, 81.7, 78.7, 77.3, 77.0, 76.7, 74.8, 70.8, 70.8, 68.2, 68.0, 64.6, 55.5, 55.1, 49.2, 36.1, 34.8, 34.4, 32.7, 32.4, 13.4.

HRMS (ESI-TOF) calculated for  $\text{C}_{24}\text{H}_{25}\text{ClFNO}_2$   $[\text{M}]^+$  413.9174, found 413.9051.

## 7. $^1\text{H}$ and $^{13}\text{C}$ NMR Spectra (3a-3bt)

### $^1\text{H}$ NMR of 3a (400 MHz, 32 scans, RT, $\text{CDCl}_3$ )

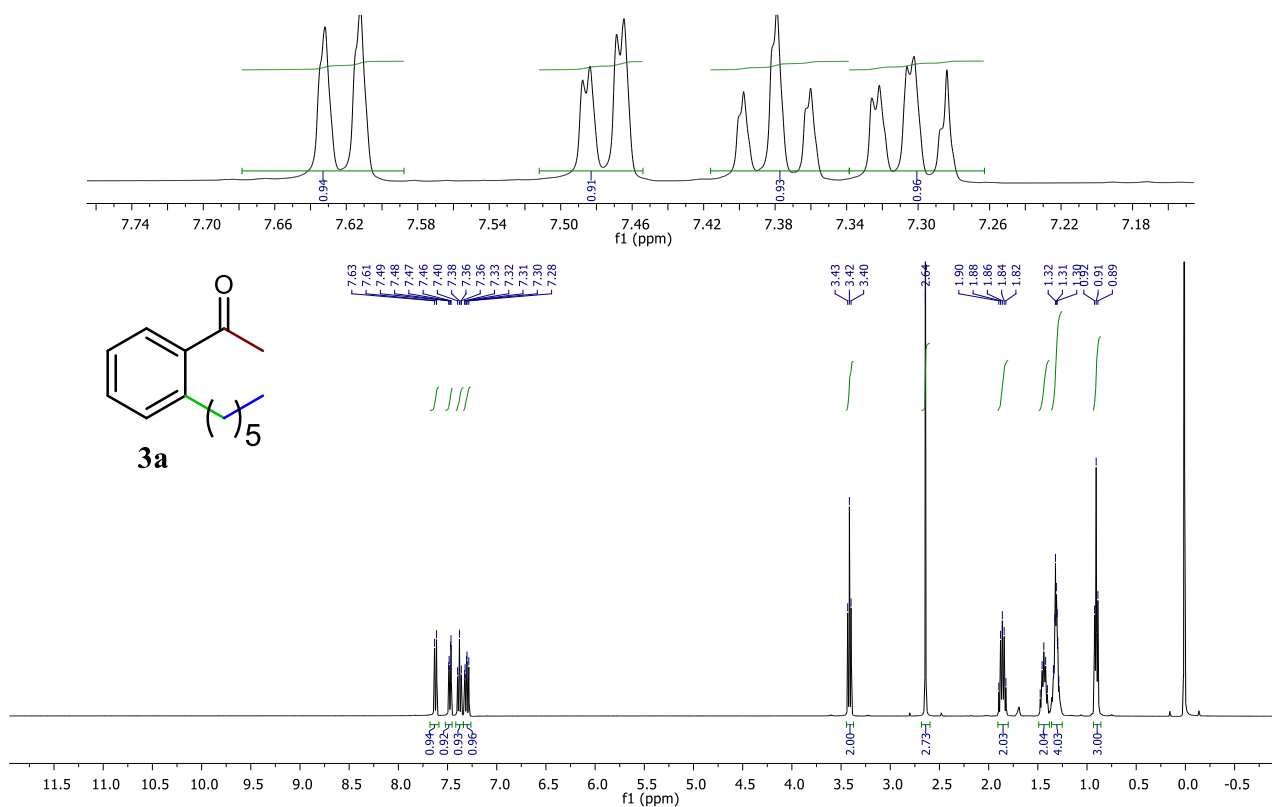

### $^{13}\text{C}$ NMR of 3a (101 MHz, 512 scans, RT, $\text{CDCl}_3$ )

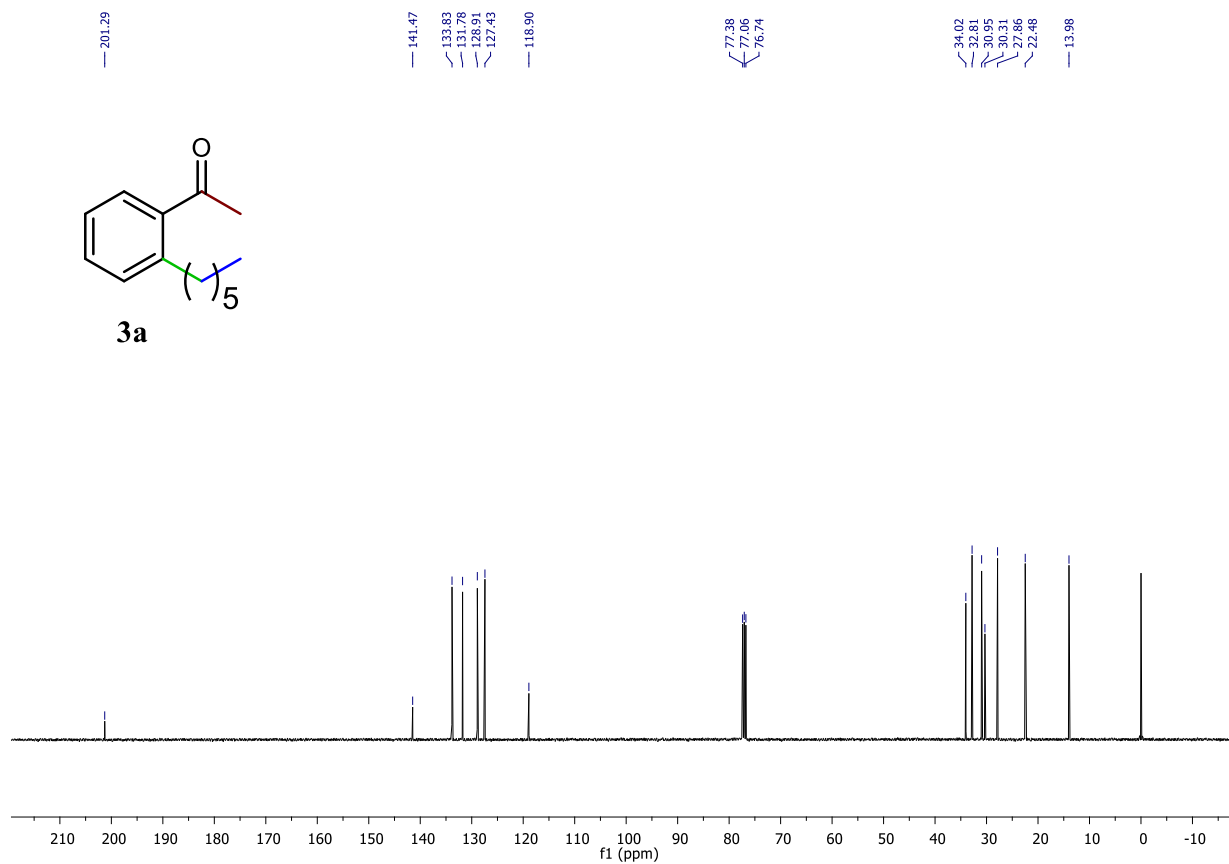

**<sup>1</sup>H NMR of 3b (400 MHz, 32 scans, RT, CDCl<sub>3</sub>)**

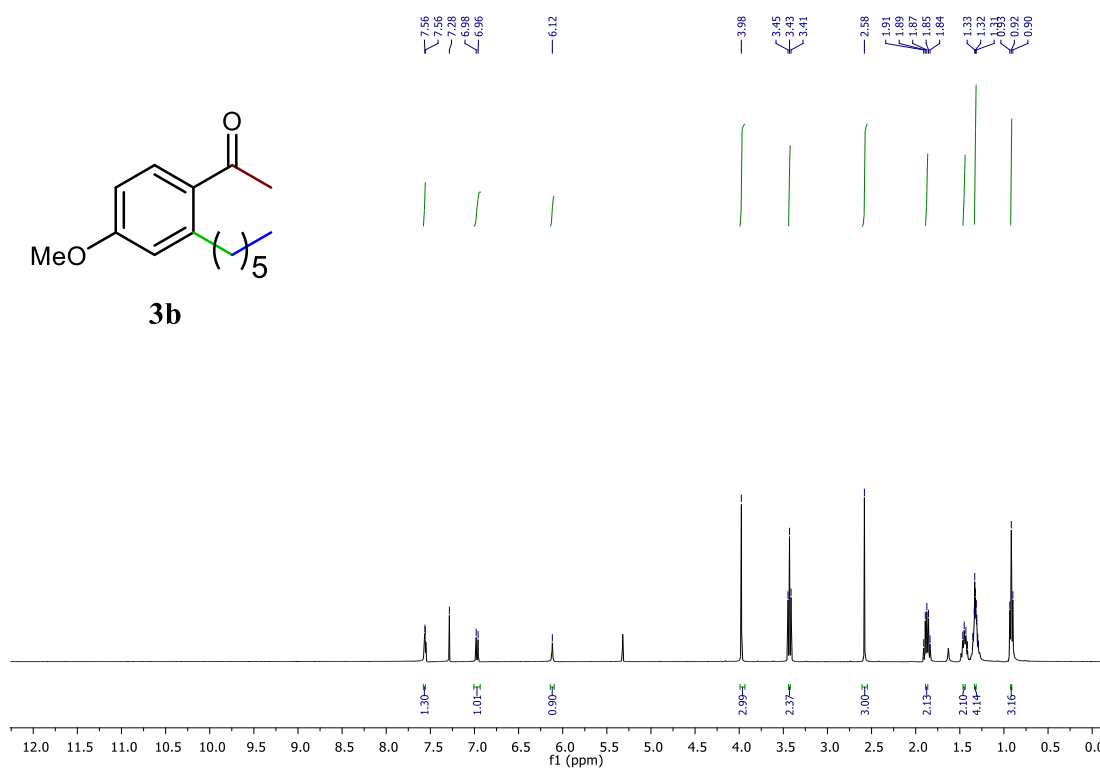

**<sup>13</sup>C NMR of 3b (101 MHz, 512 scans, RT, CDCl<sub>3</sub>)**

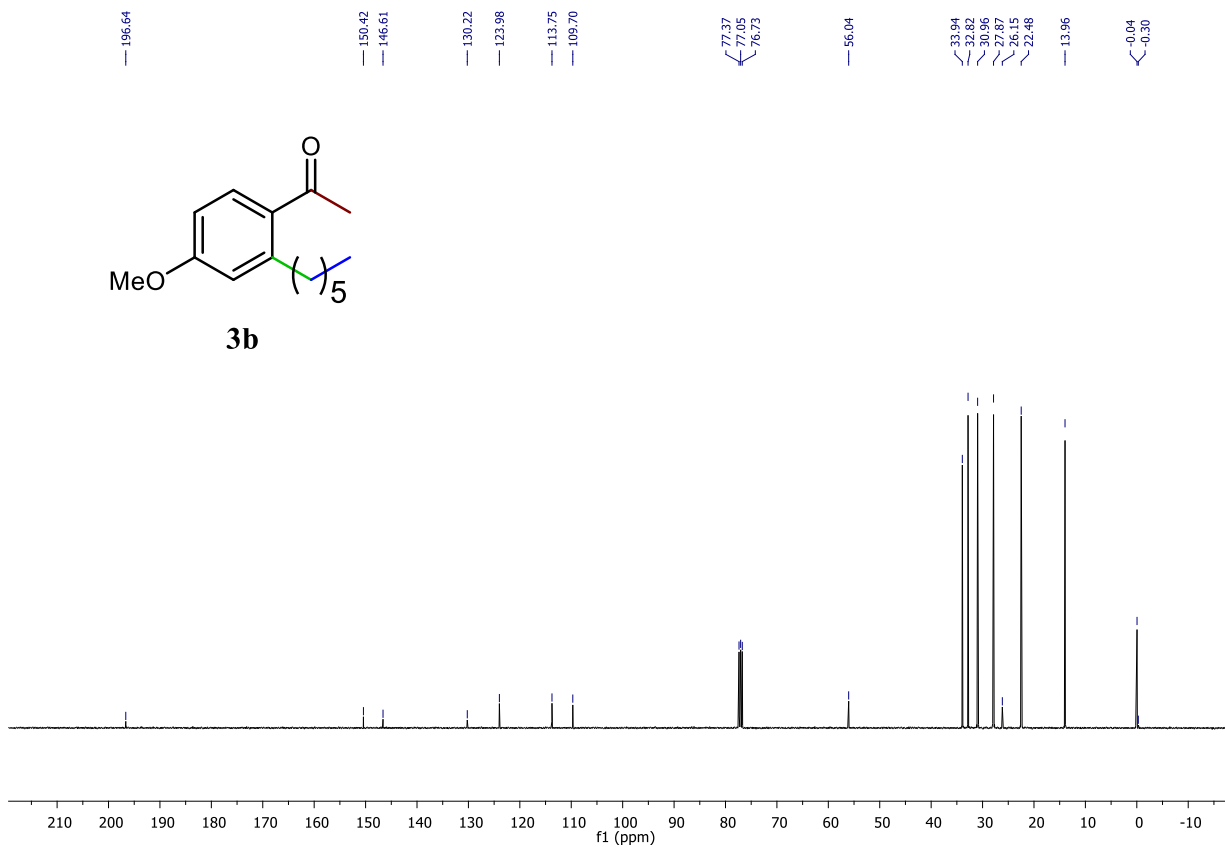

**<sup>1</sup>H NMR of 3c (400 MHz, 32 scans, RT, CDCl<sub>3</sub>)**

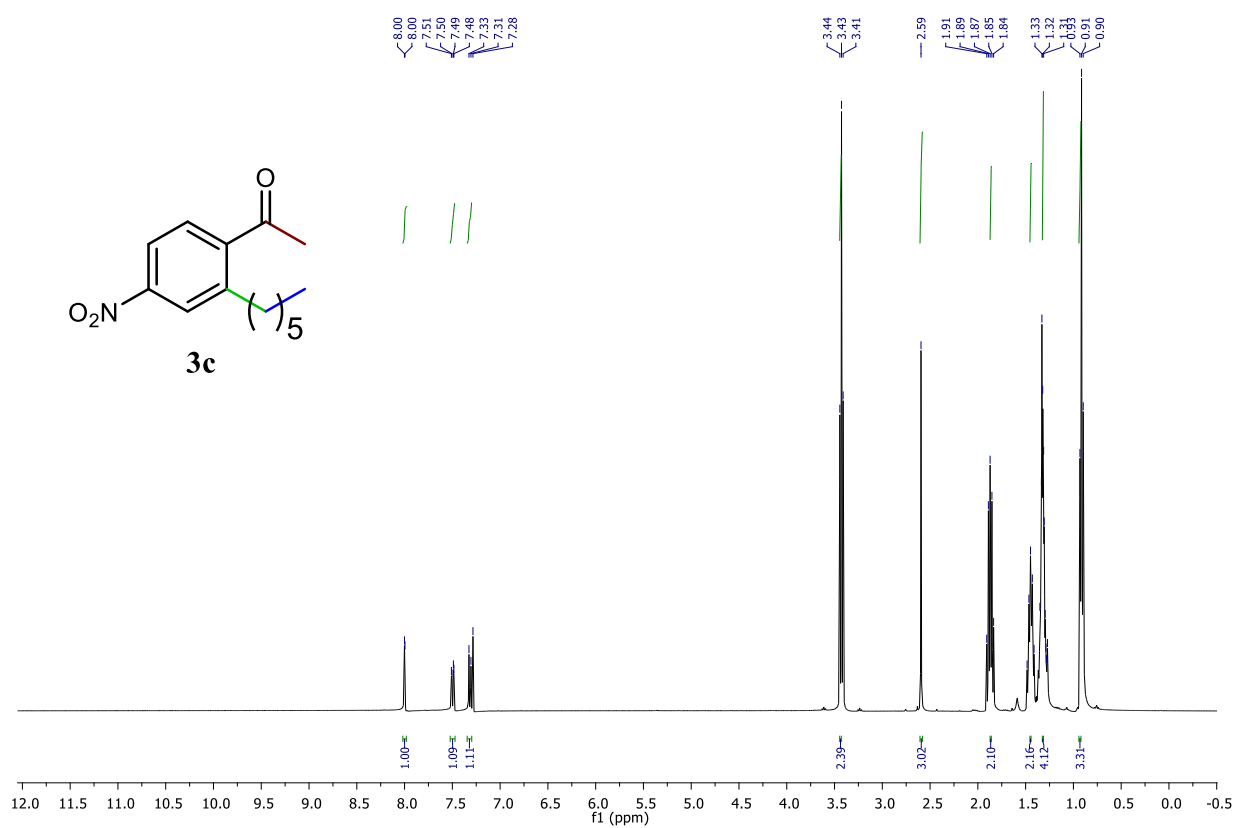

**<sup>13</sup>C NMR of 3c (101 MHz, 512 scans, RT, CDCl<sub>3</sub>)**

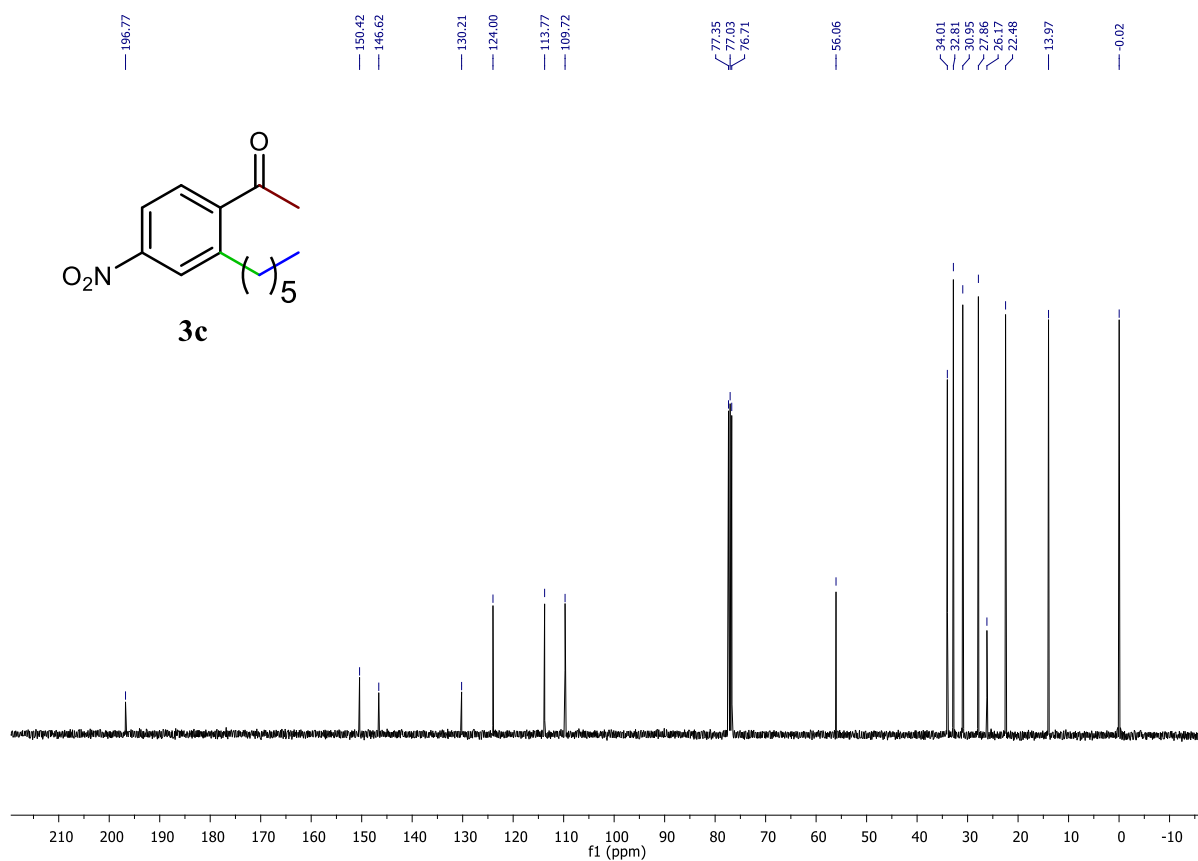

**$^1\text{H}$  NMR of 3d (400 MHz, 32 scans, RT,  $\text{CDCl}_3$ )**

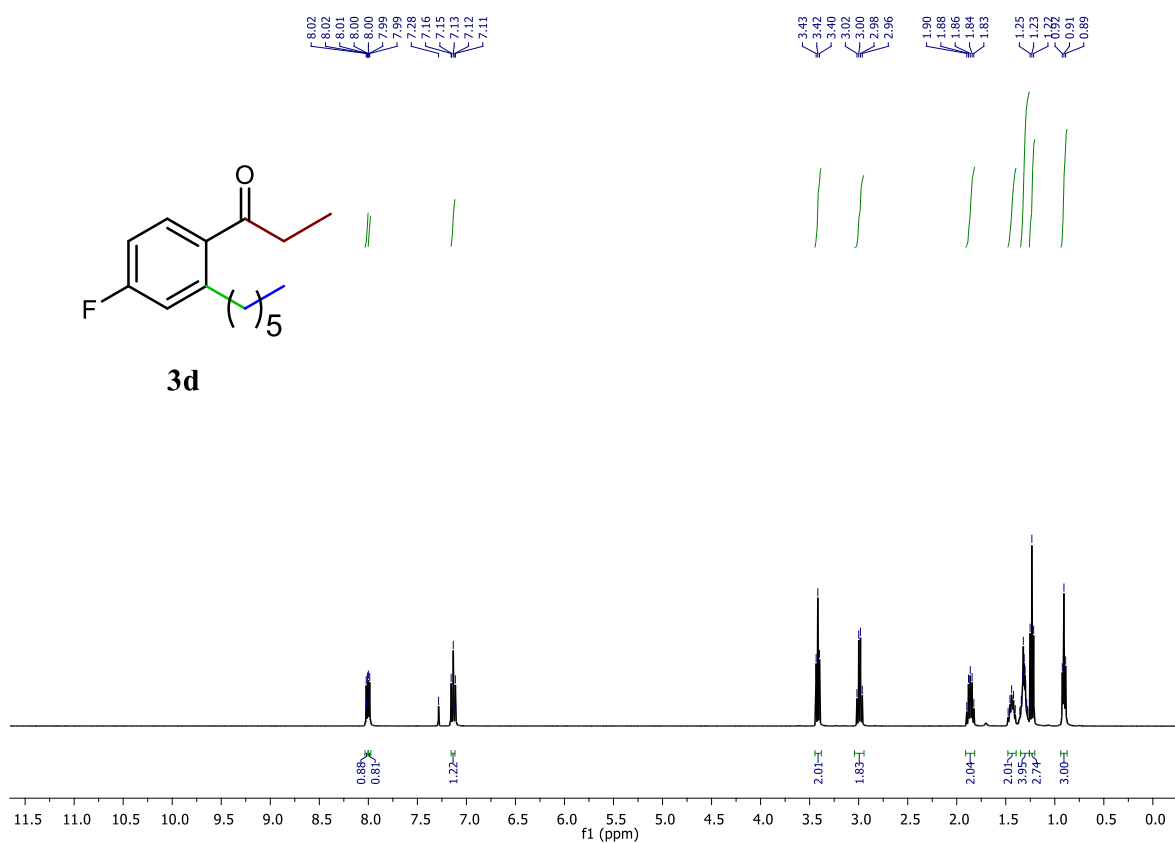

**$^{13}\text{C}$  NMR of 3d (101 MHz, 512**

**scans, RT,  $\text{CDCl}_3$ )**

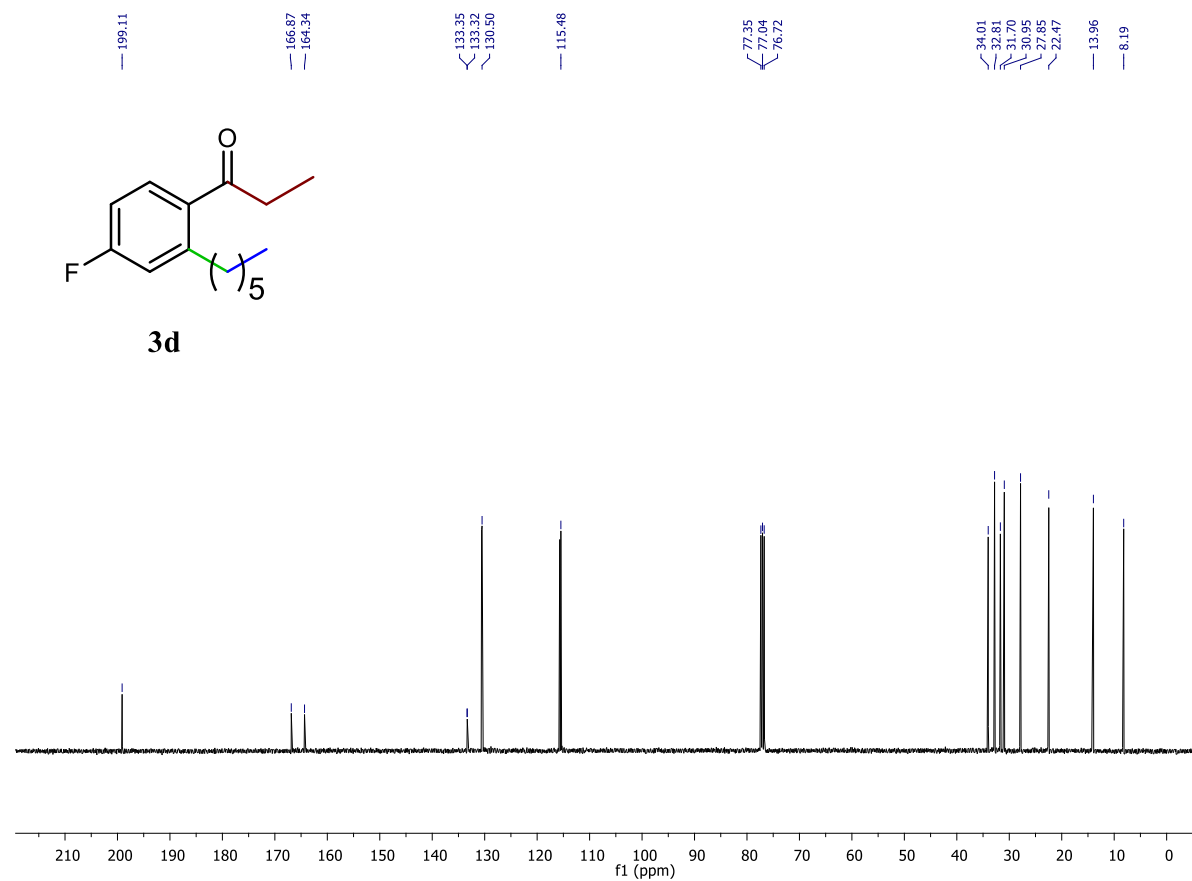



$^{19}\text{F}$  NMR of **3d** (377 MHz, RT,  $\text{CDCl}_3$ )

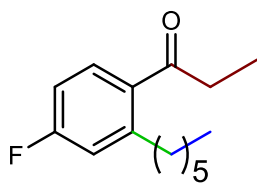

**3d**

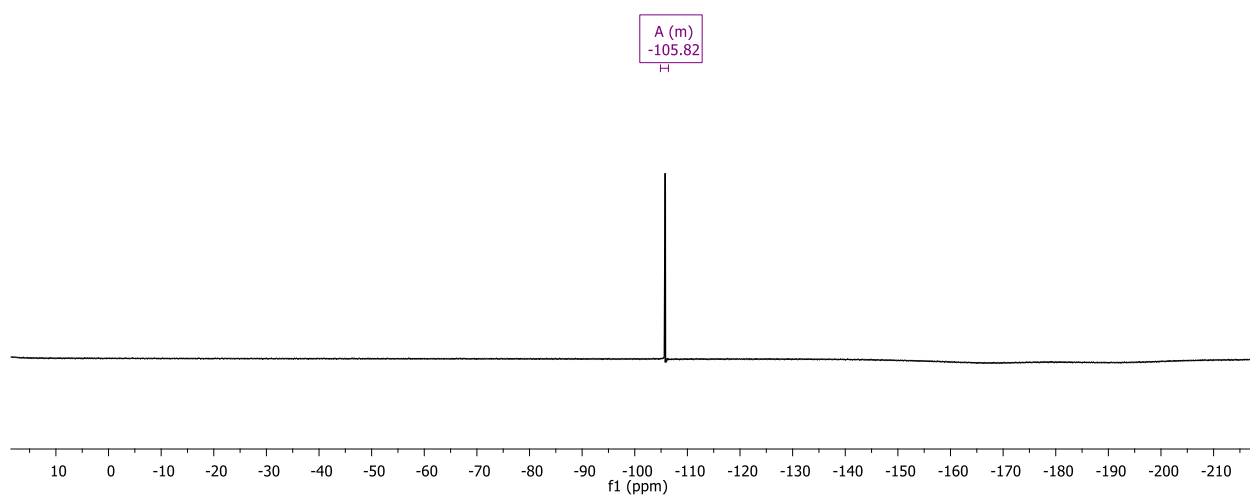

**<sup>1</sup>H NMR of 3e (400 MHz, 32 scans, RT, CDCl<sub>3</sub>)**

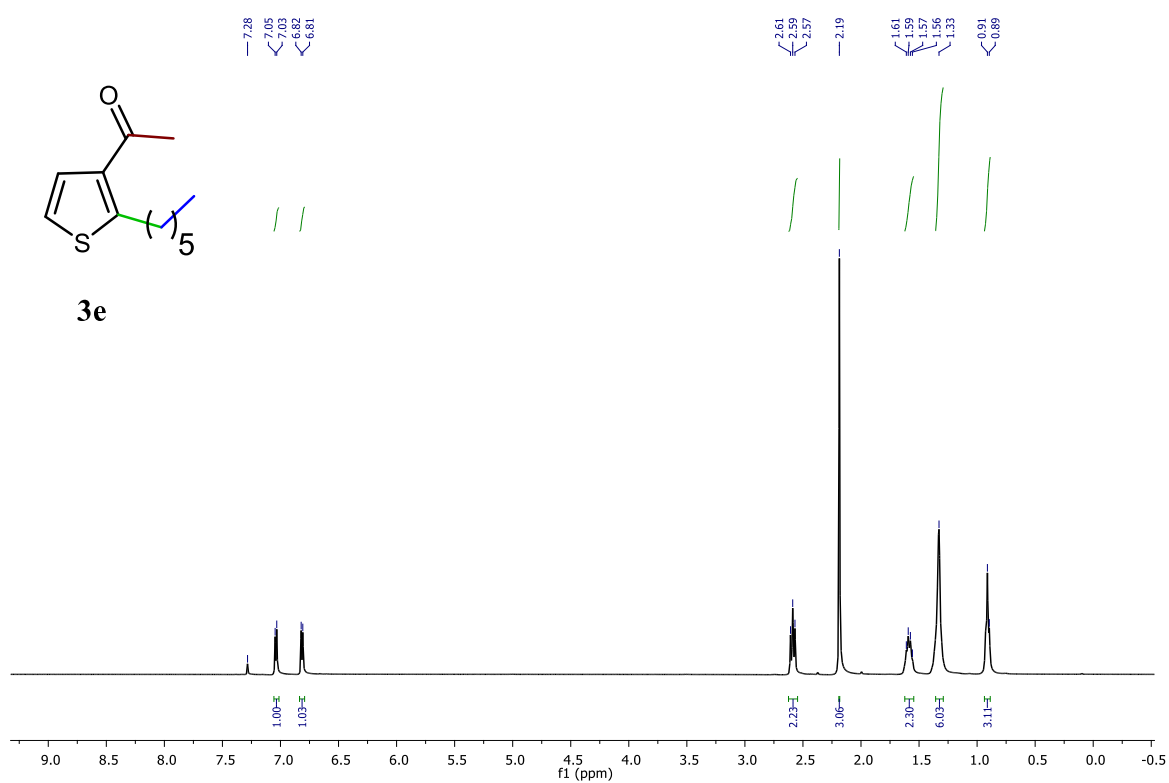

**<sup>13</sup>C NMR of 3e (101 MHz, 512 scans, RT, CDCl<sub>3</sub>)**

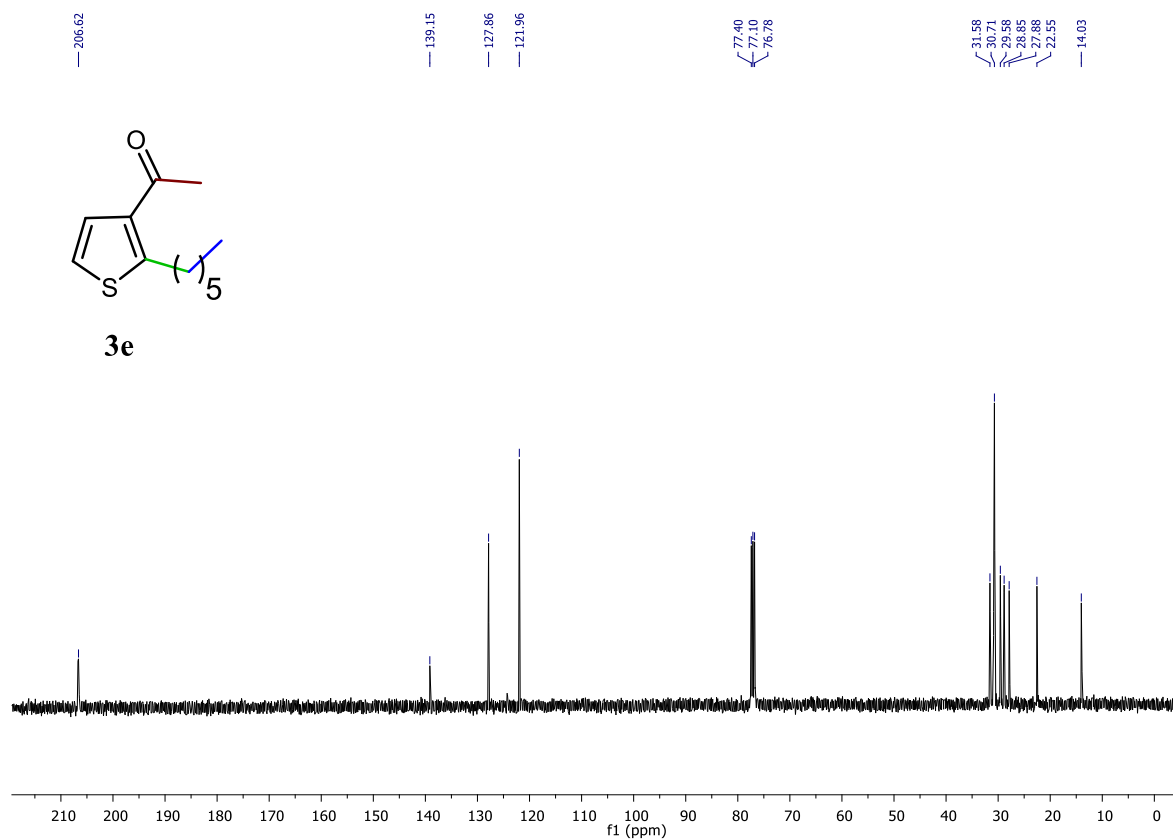

**$^1\text{H}$  NMR of 3f (400 MHz, 32 scans, RT,  $\text{CDCl}_3$ )**

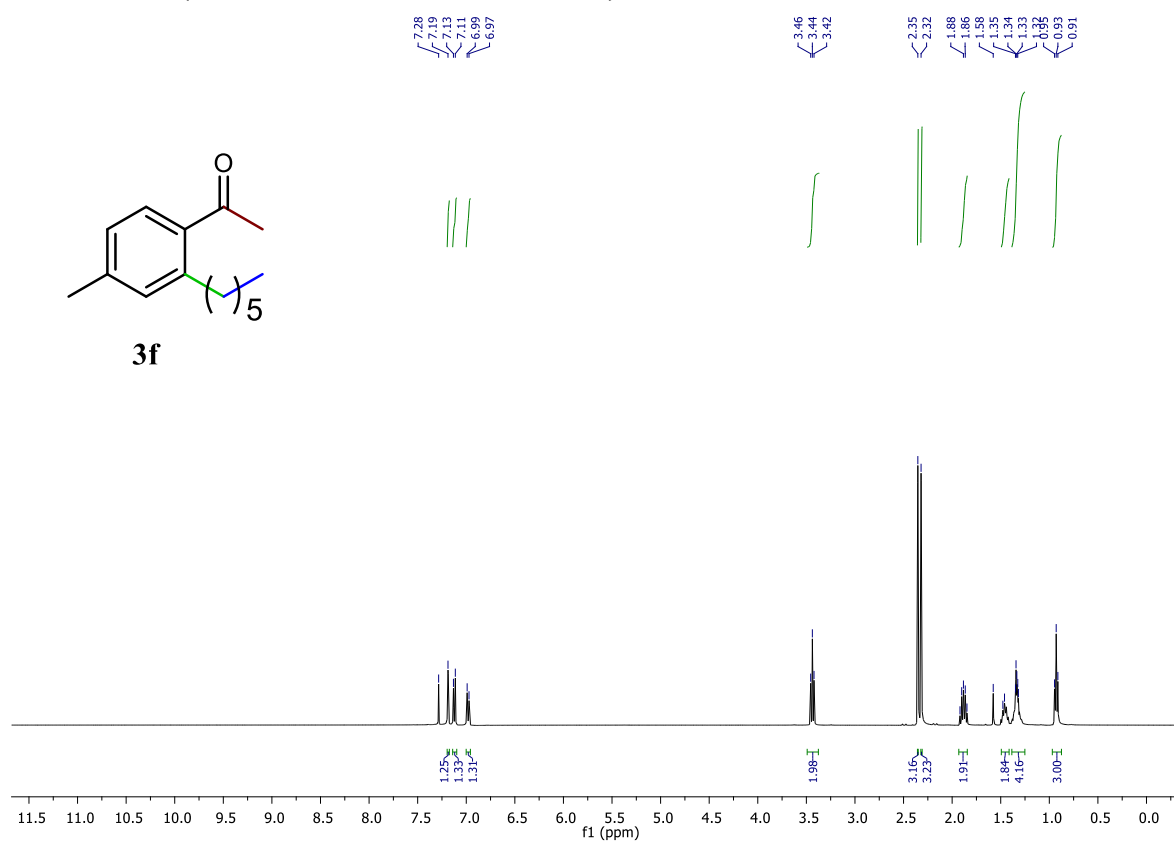

**$^{13}\text{C}$  NMR of 3f (101 MHz, 512 scans, RT,  $\text{CDCl}_3$ )**

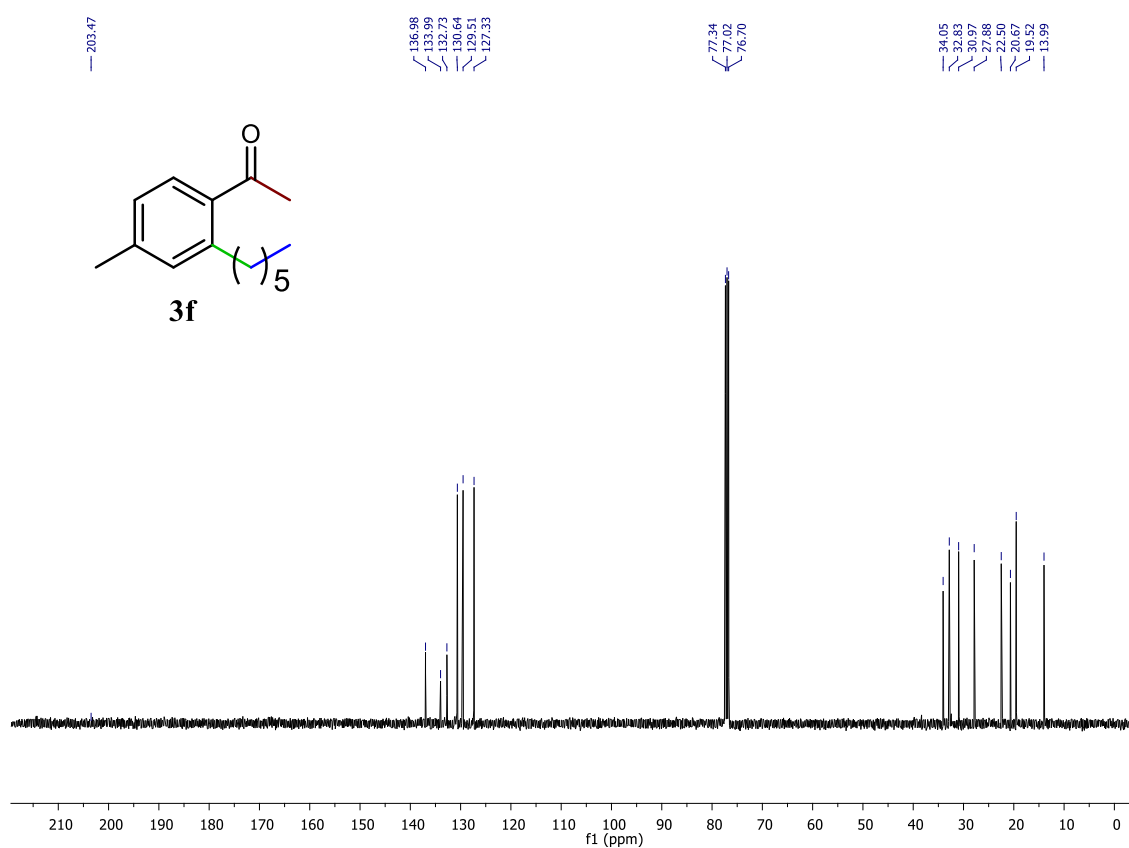

**<sup>1</sup>H NMR of 3g (400 MHz, 32 scans, RT, CDCl<sub>3</sub>)**

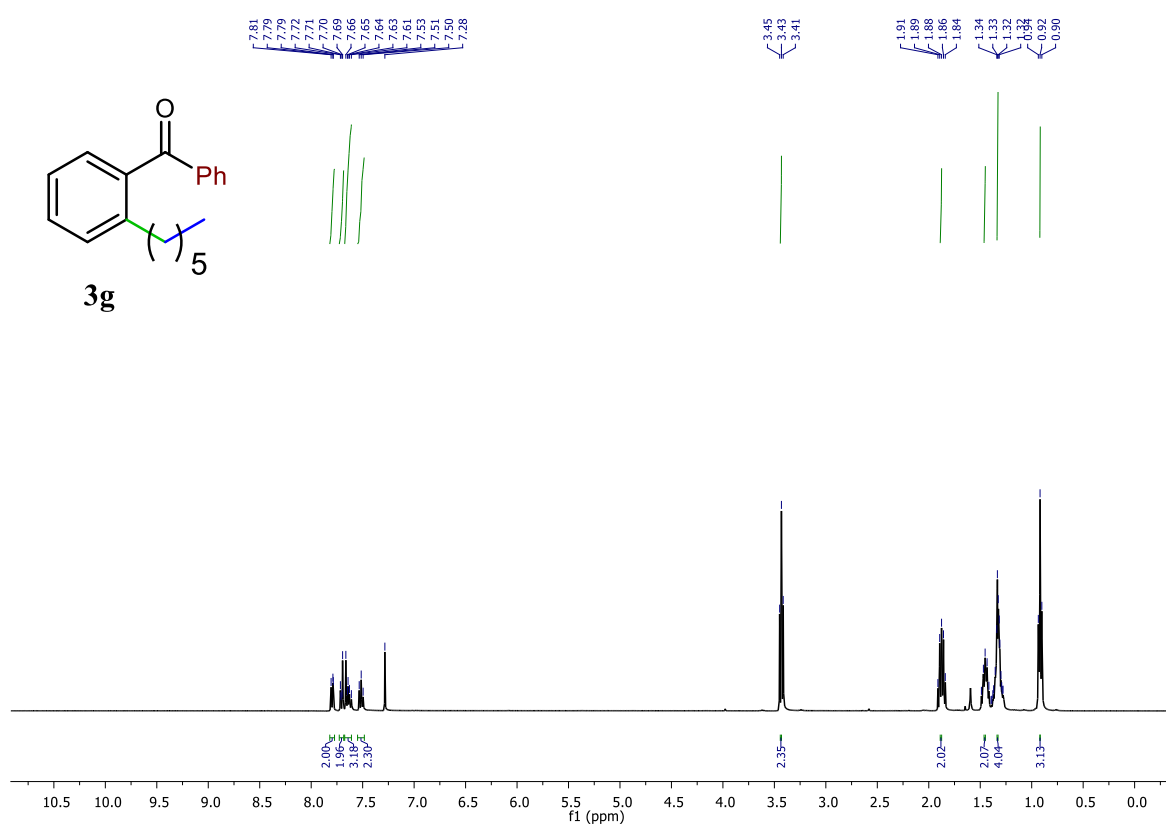

**<sup>13</sup>C NMR of 3g (101 MHz, 512 scans, RT, CDCl<sub>3</sub>)**

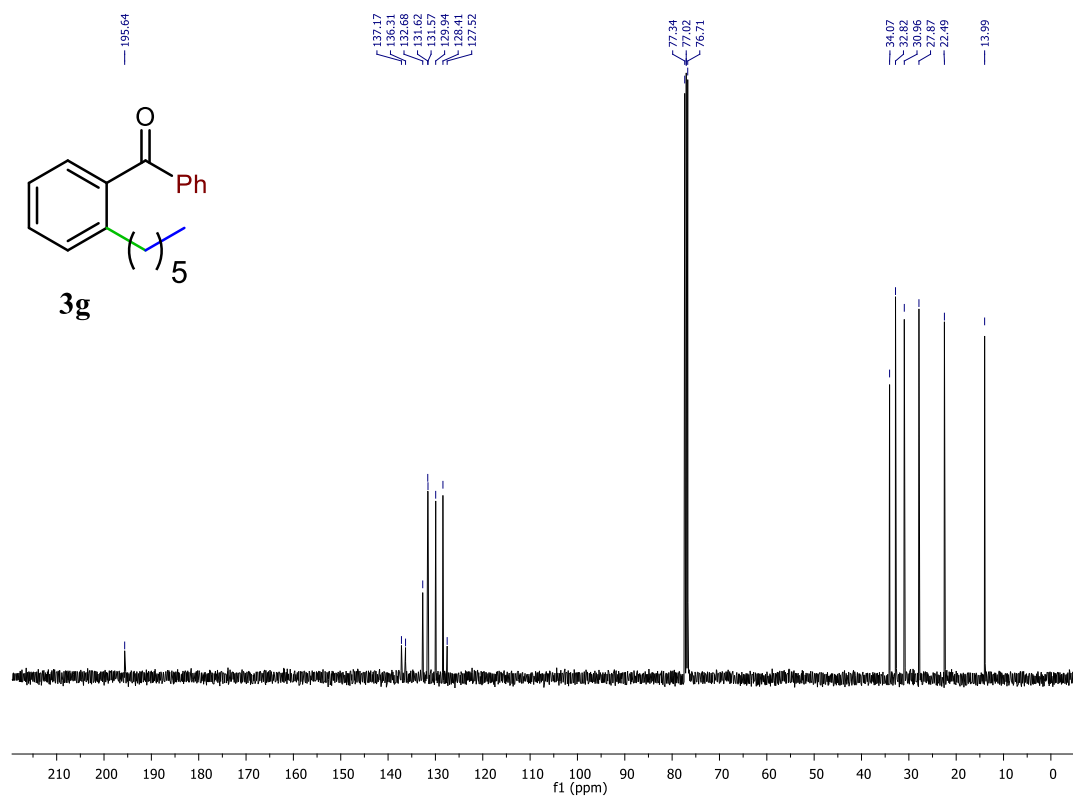

**$^1\text{H}$  NMR of 3h (400 MHz, 32 scans, RT,  $\text{CDCl}_3$ )**

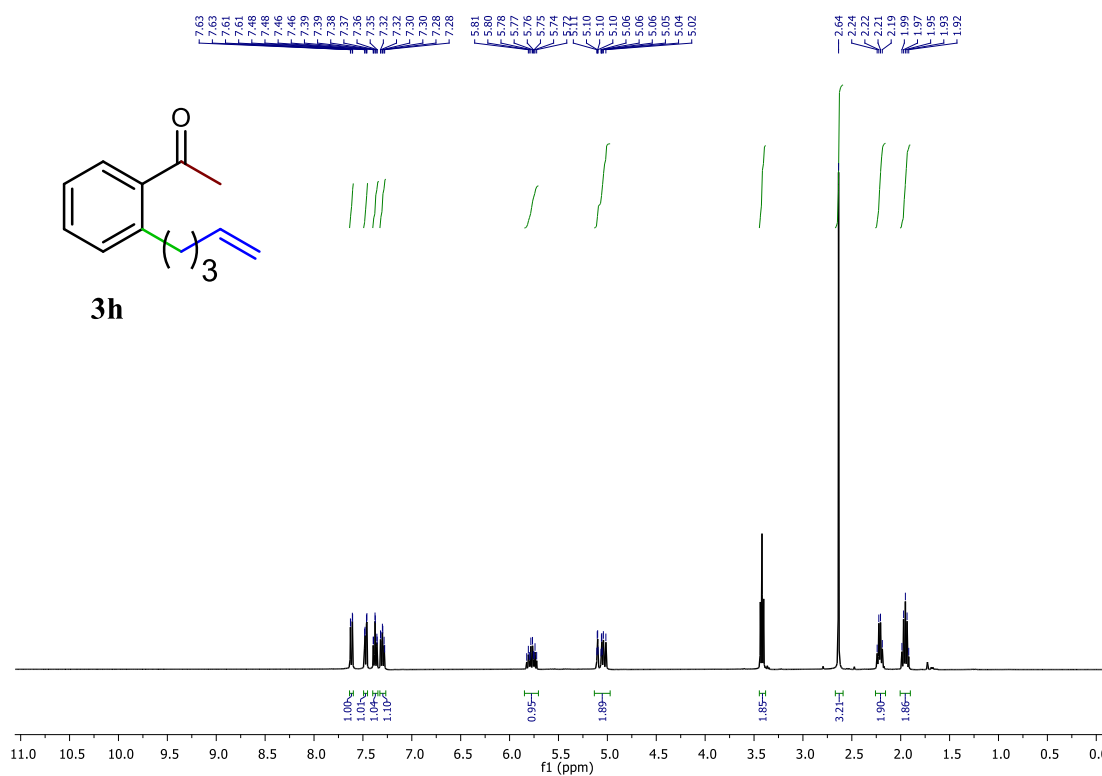

**$^{13}\text{C}$  NMR of 3h (101 MHz, 512 scans, RT,  $\text{CDCl}_3$ )**

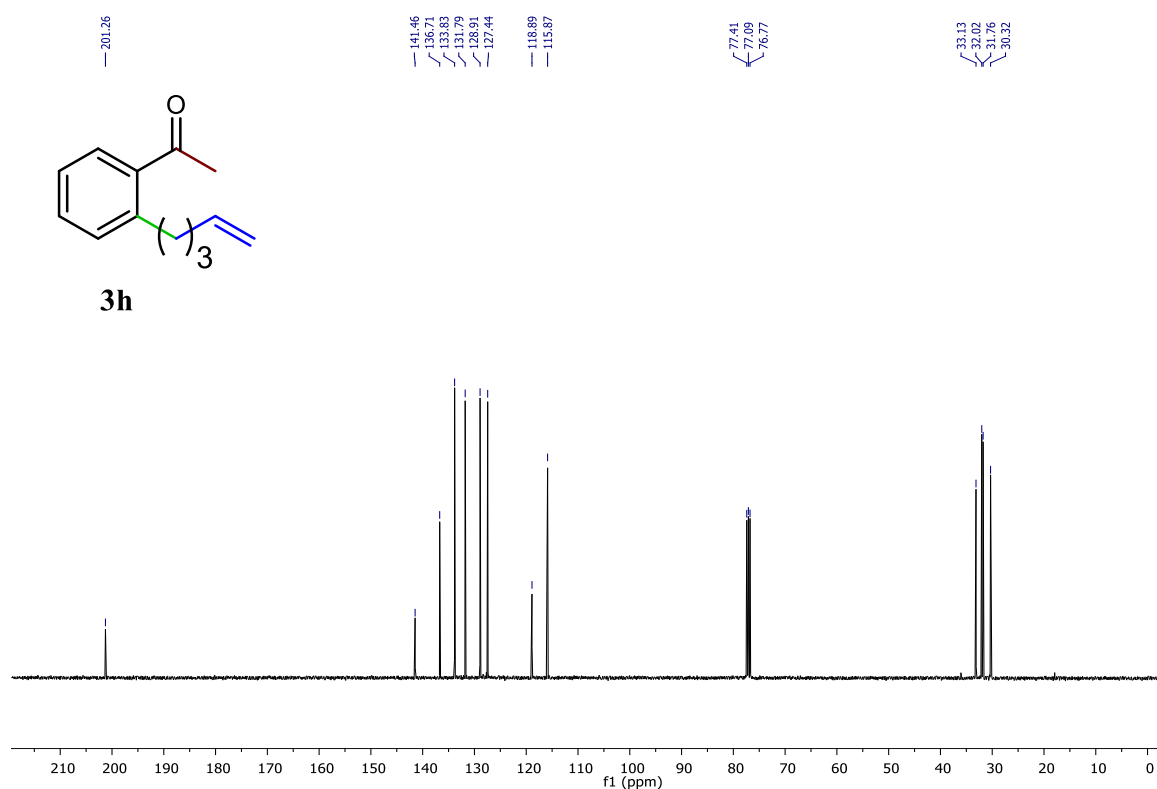

**<sup>1</sup>H NMR of 3i (400 MHz, 32 scans, RT, CDCl<sub>3</sub>)**

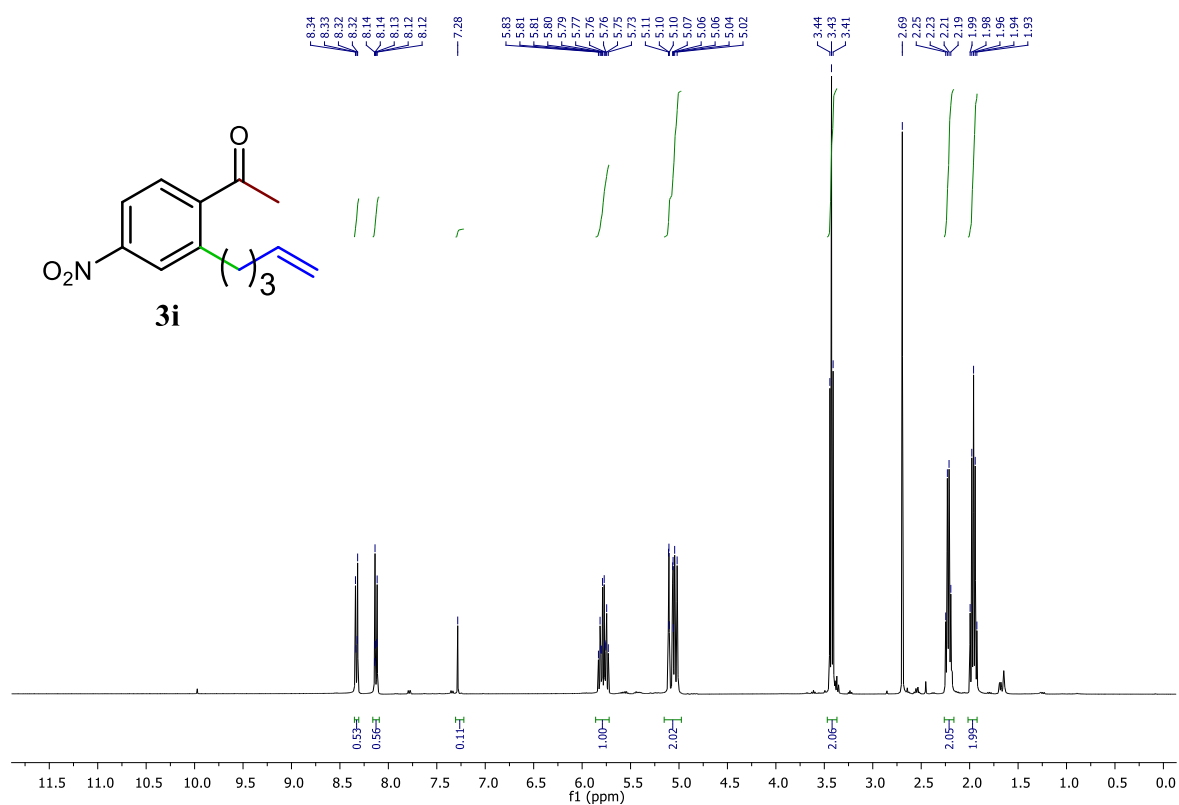

**<sup>13</sup>C NMR of 3h (101 MHz, 512 scans, RT, CDCl<sub>3</sub>)**

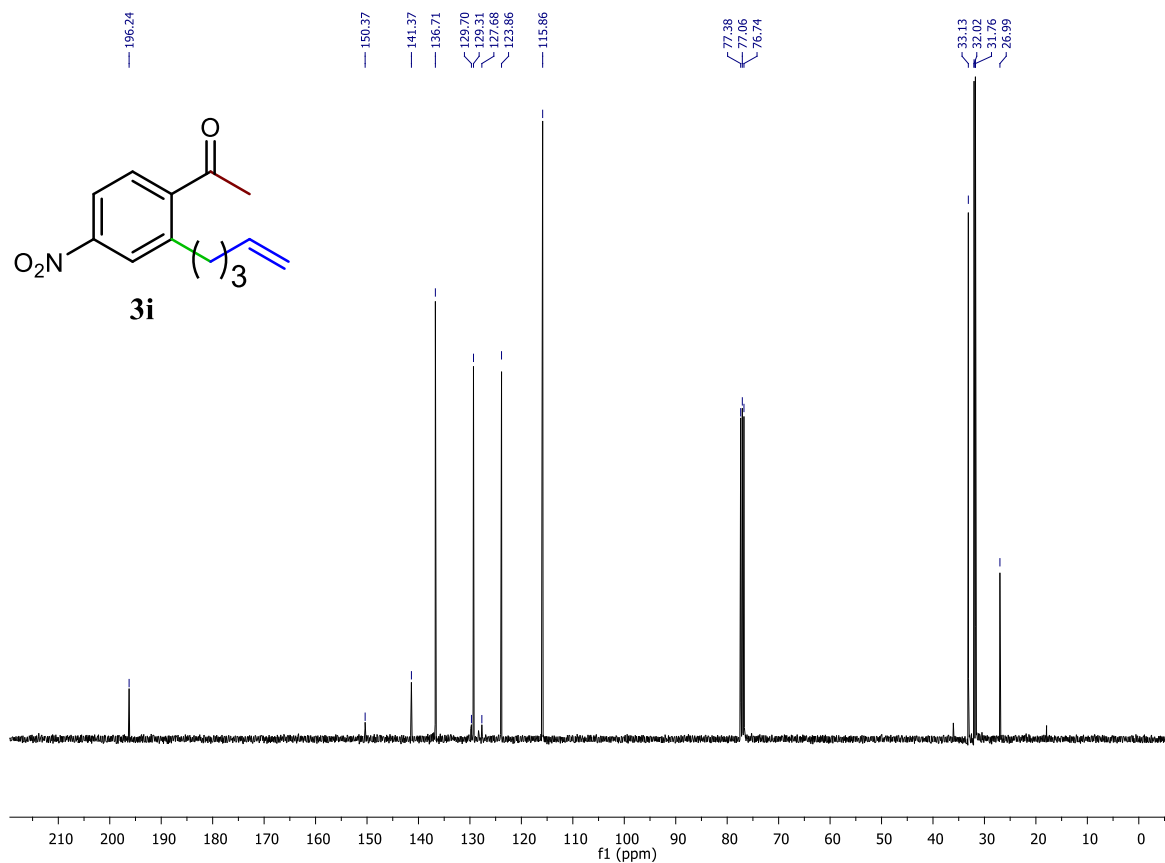

**<sup>1</sup>H NMR of 3j (400 MHz, 32 scans, RT, CDCl<sub>3</sub>)**

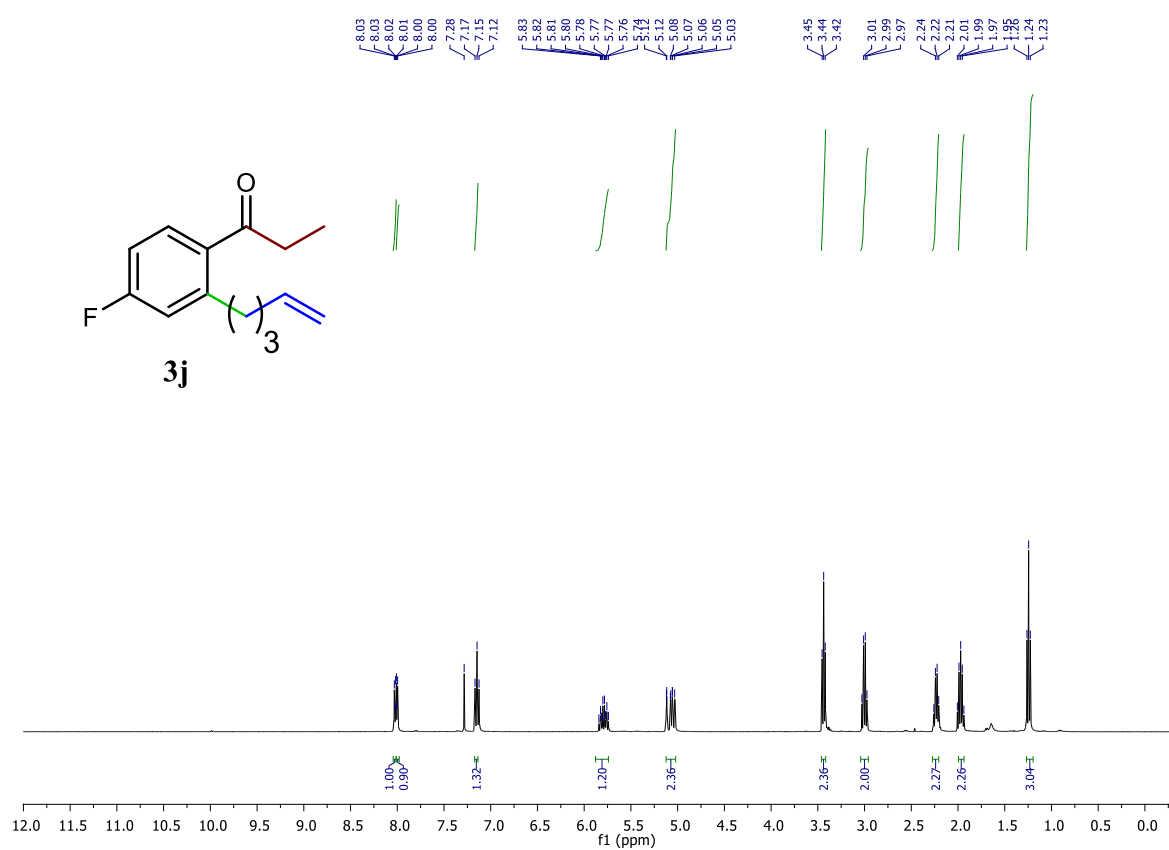

**<sup>13</sup>C NMR of 3j (101 MHz, 512 scans, RT, CDCl<sub>3</sub>)**

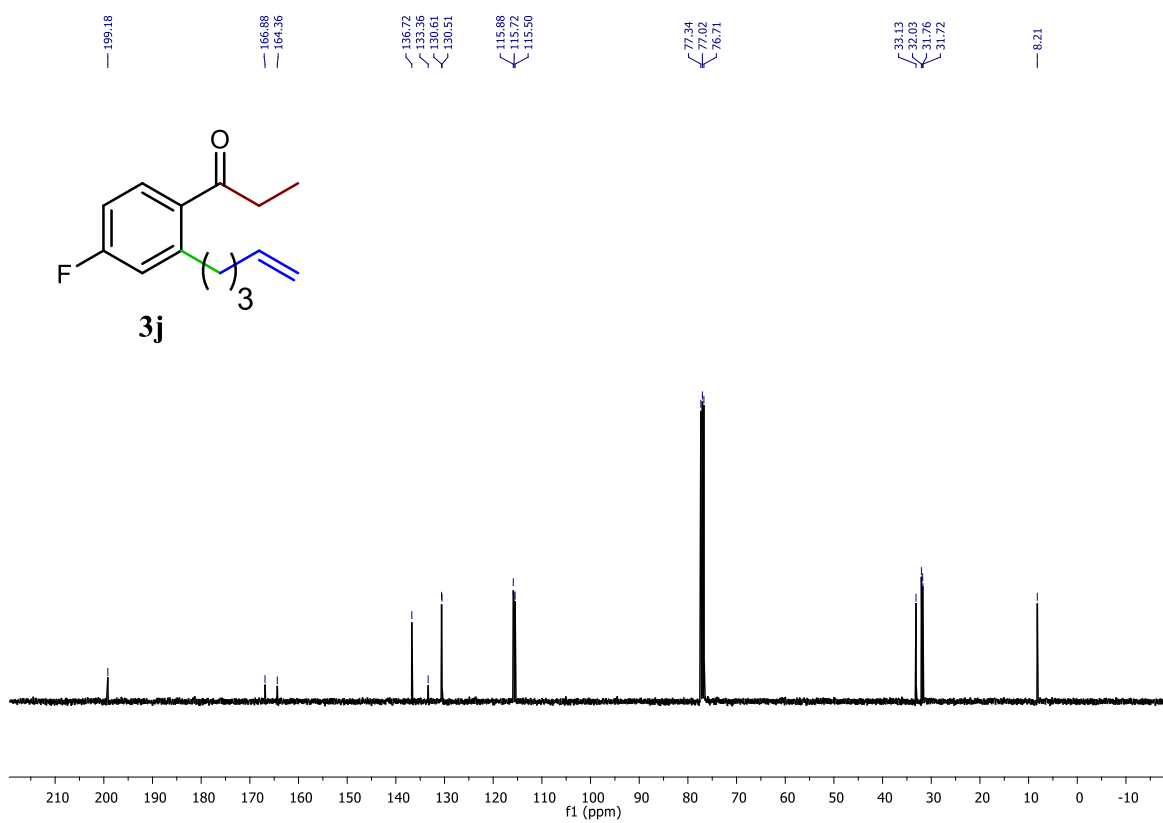



$^{19}\text{F}$  NMR of **3j** (377 MHz,  $\text{CDCl}_3$ )

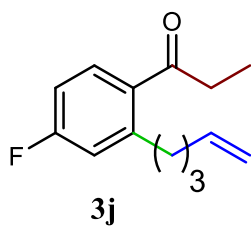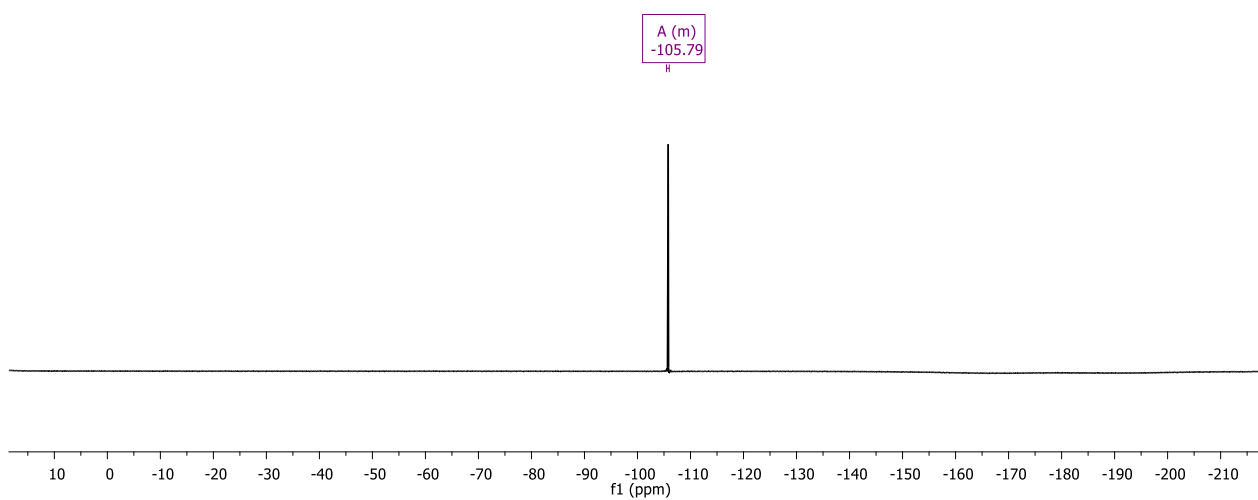

**$^1\text{H}$  NMR of 3k (400 MHz, 32 scans, RT,  $\text{CDCl}_3$ )**

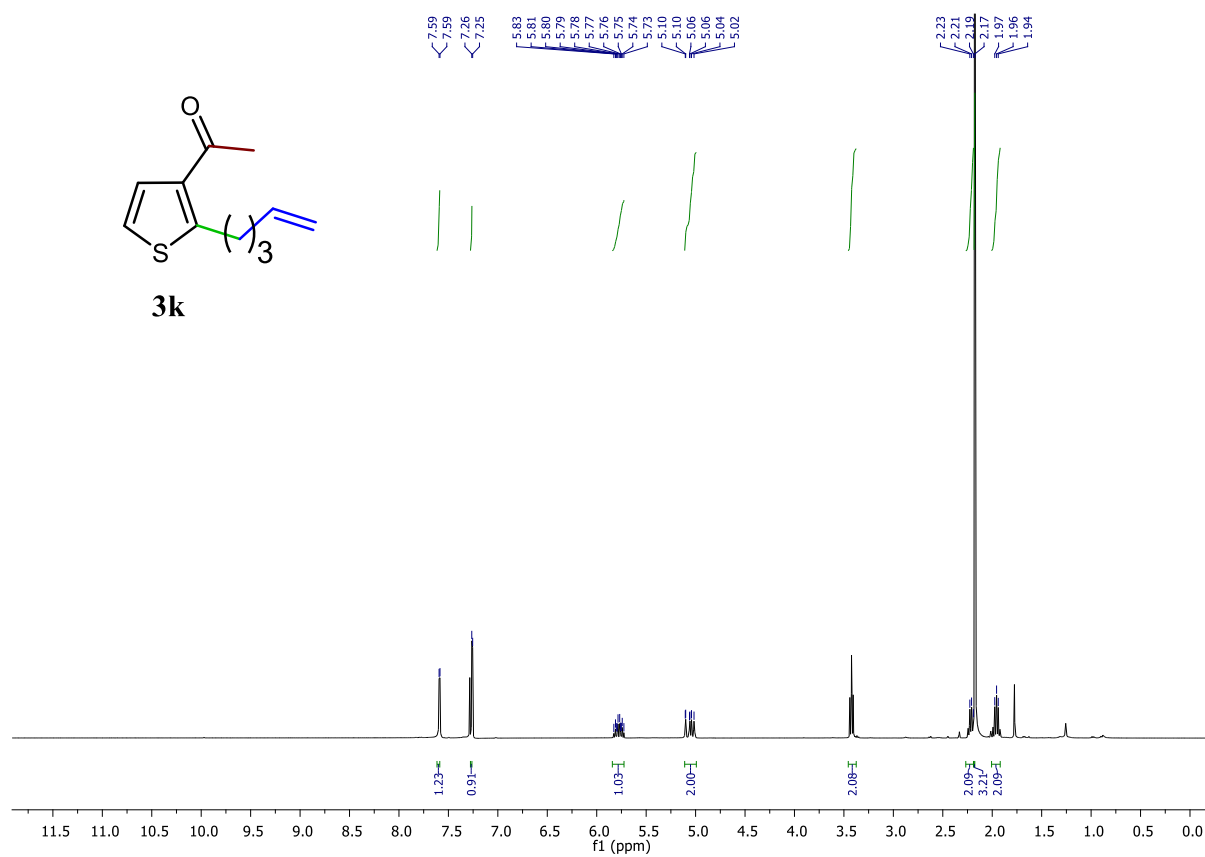

**$^{13}\text{C}$  NMR of 3k (101 MHz, 512 scans, RT,  $\text{CDCl}_3$ )**

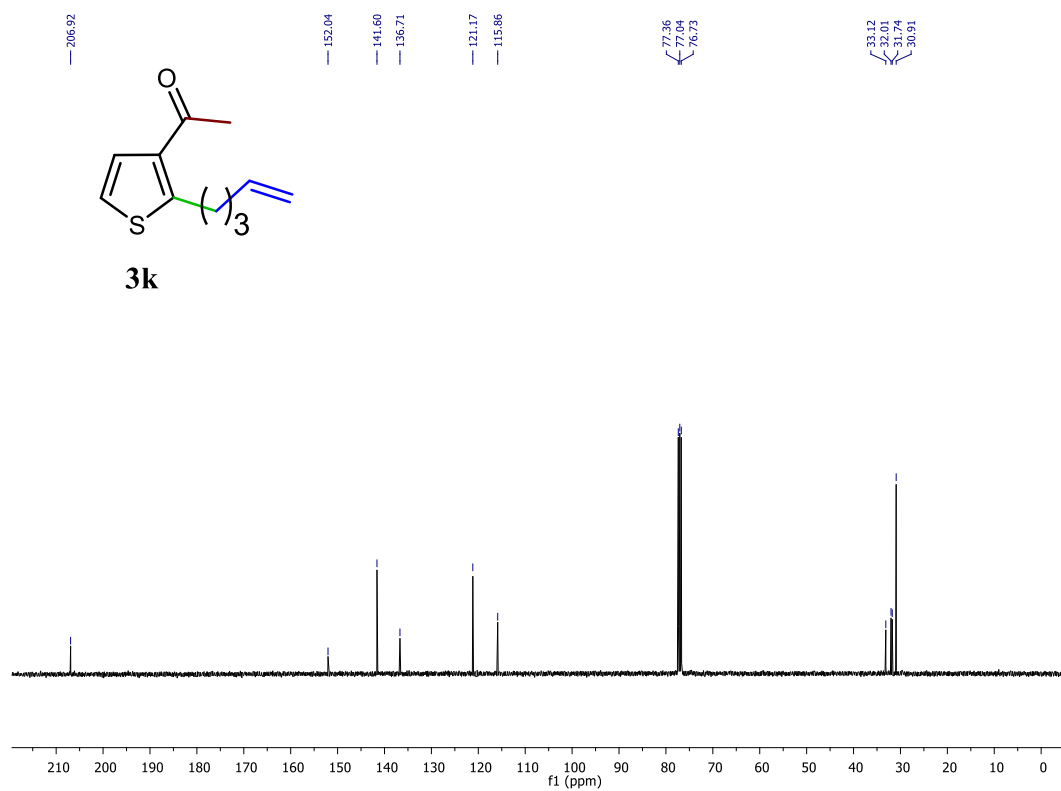

**<sup>1</sup>H NMR of 3l (400 MHz, 32 scans, RT, CDCl<sub>3</sub>)**

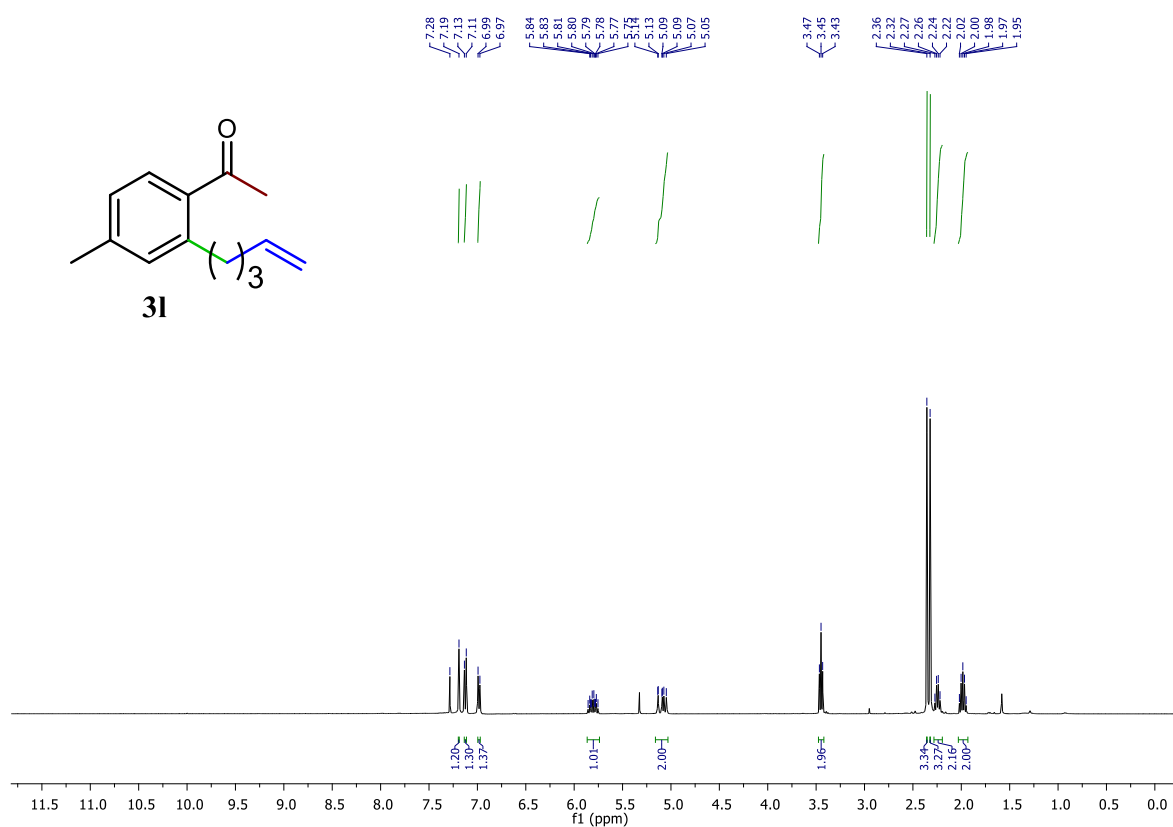

**<sup>13</sup>C NMR of 3l (101 MHz, 512 scans, RT, CDCl<sub>3</sub>)**

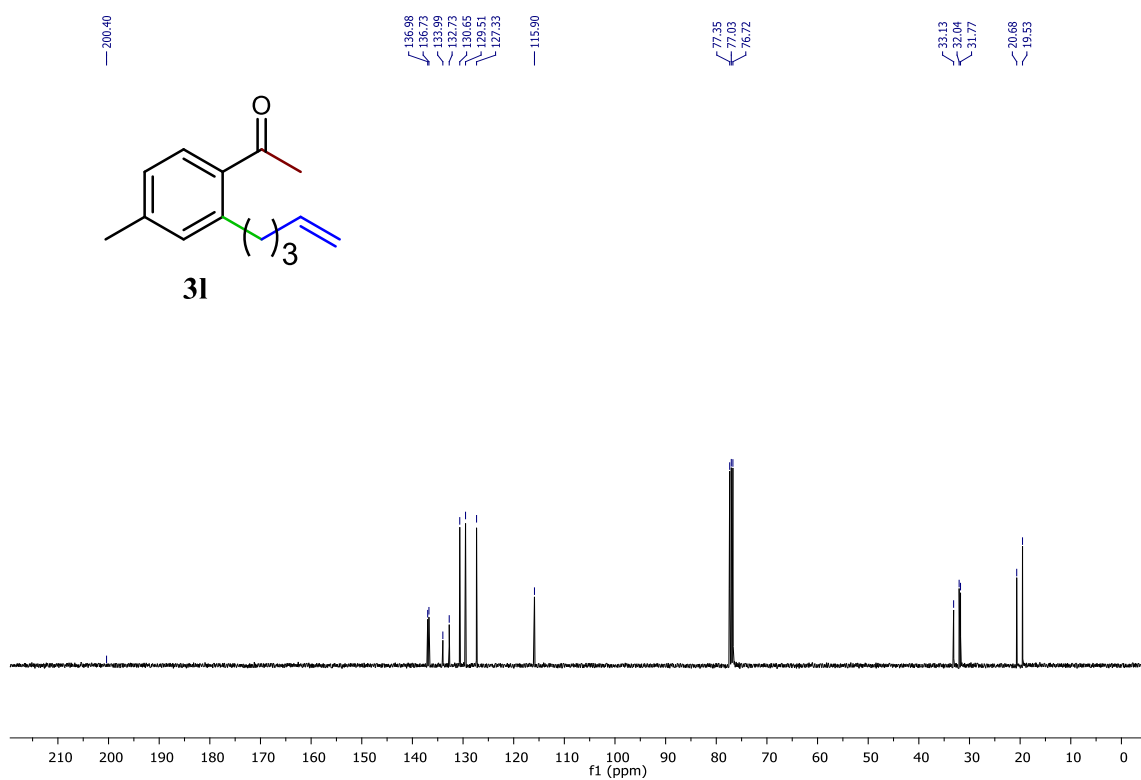

**$^1\text{H}$  NMR of 3m (400 MHz, 32 scans, RT,  $\text{CDCl}_3$ )**

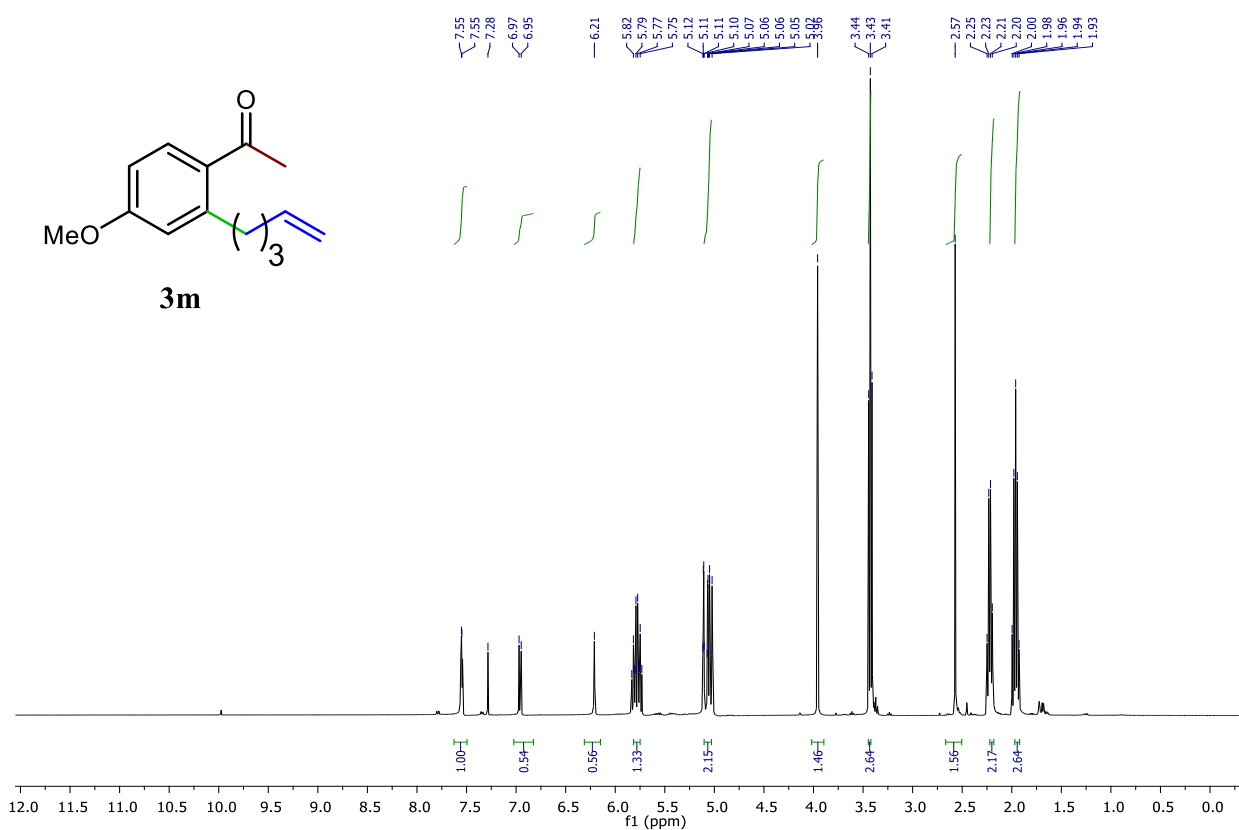

**$^{13}\text{C}$  NMR of 3m (101 MHz, 512 scans, RT,  $\text{CDCl}_3$ )**

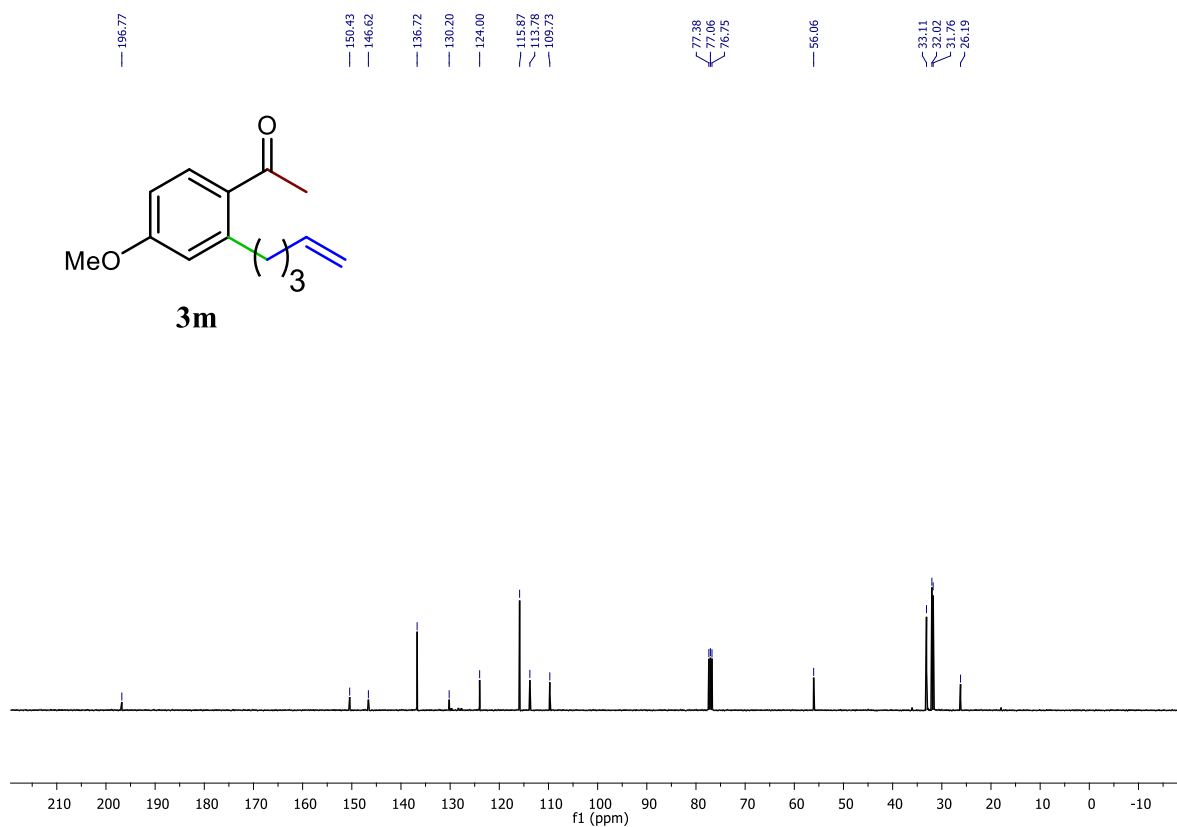

**$^1\text{H}$  NMR of 3n (400 MHz, 32 scans, RT,  $\text{CDCl}_3$ )**

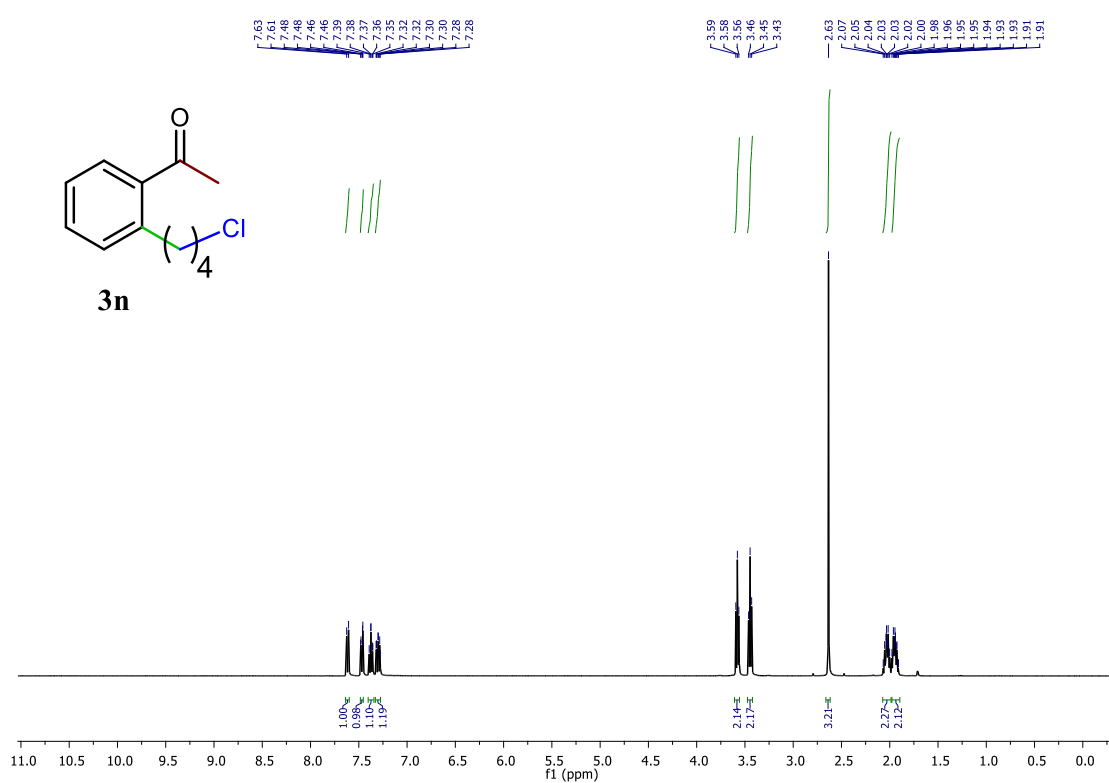

**$^{13}\text{C}$  NMR of 3n (101 MHz, 512 scans, RT,  $\text{CDCl}_3$ )**

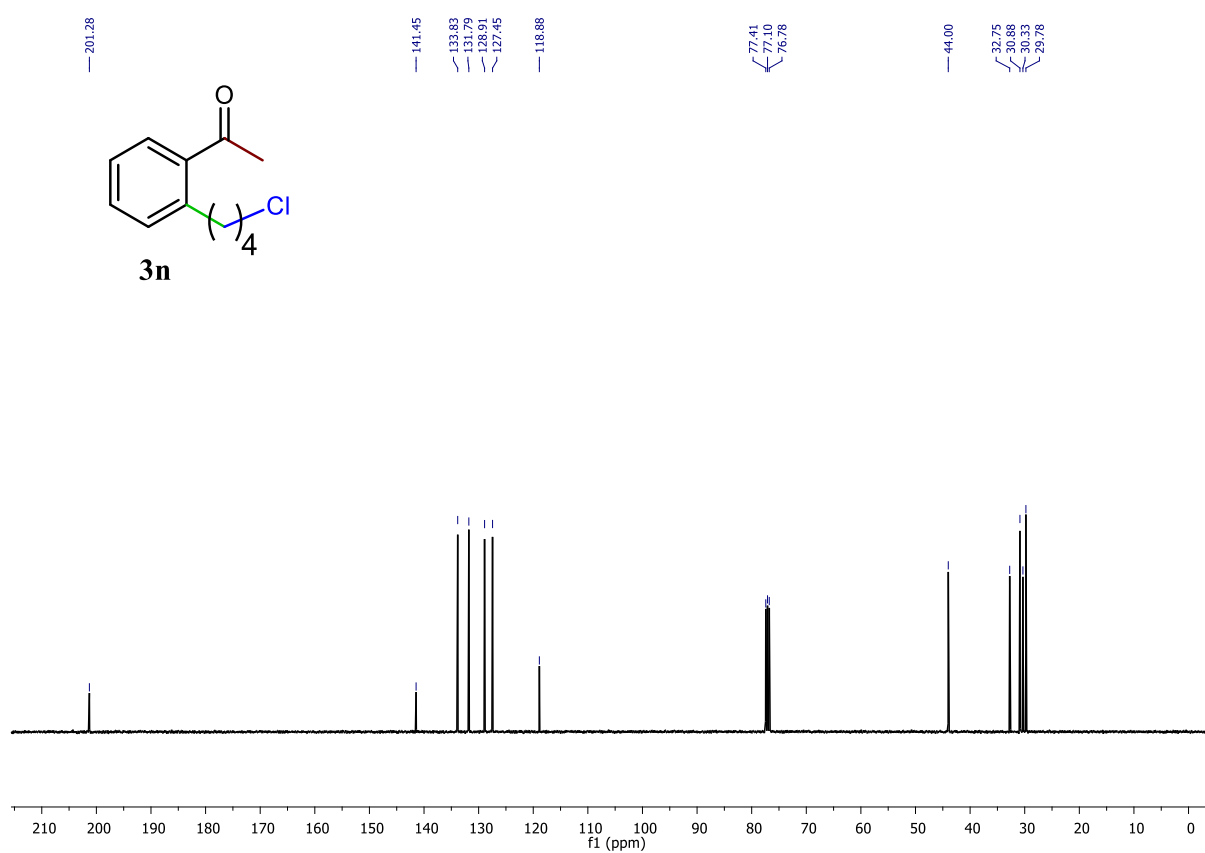

**$^1\text{H}$  NMR of 3o (400 MHz, 32 scans, RT,  $\text{CDCl}_3$ )**

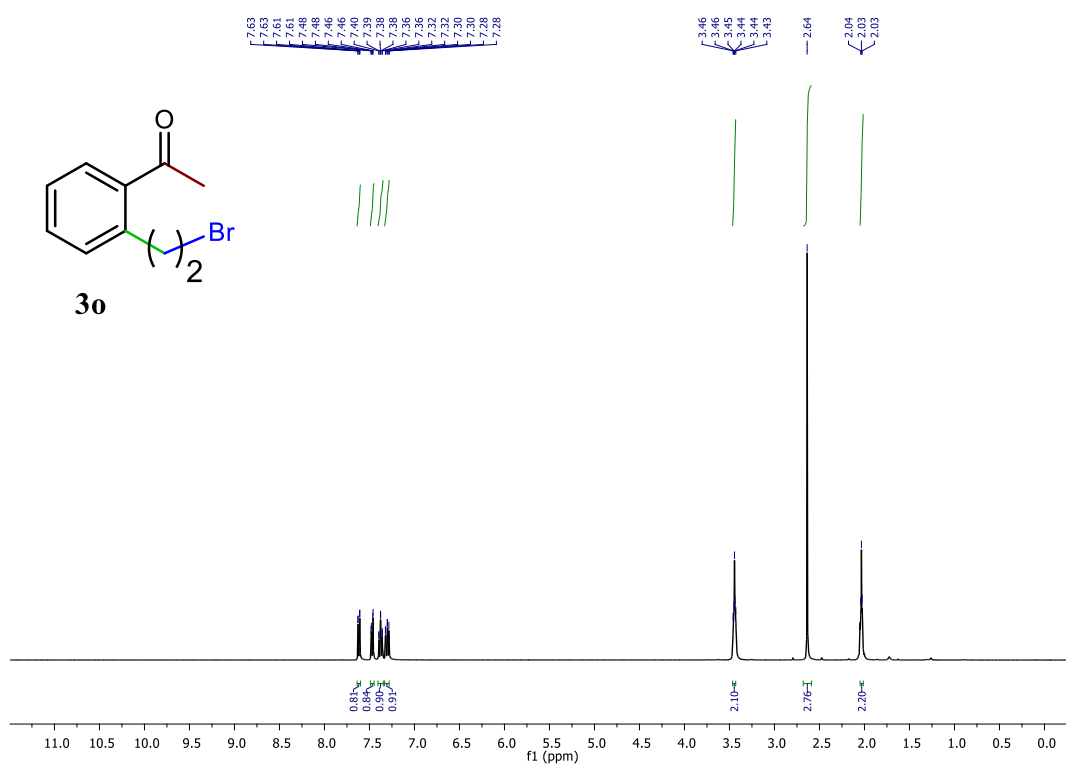

**$^{13}\text{C}$  NMR of 3o (101 MHz, 512 scans, RT,  $\text{CDCl}_3$ )**

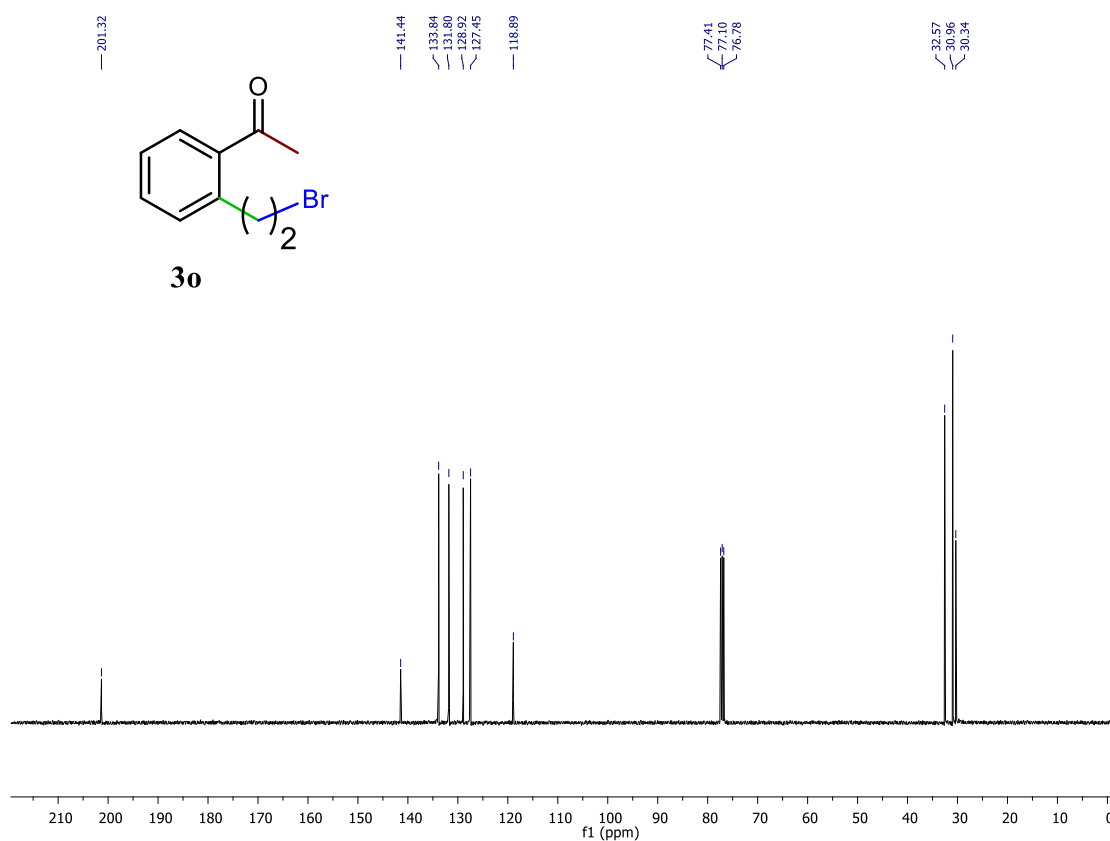

**$^1\text{H}$  NMR of 3p (400 MHz, 32 scans, RT,  $\text{CDCl}_3$ )**

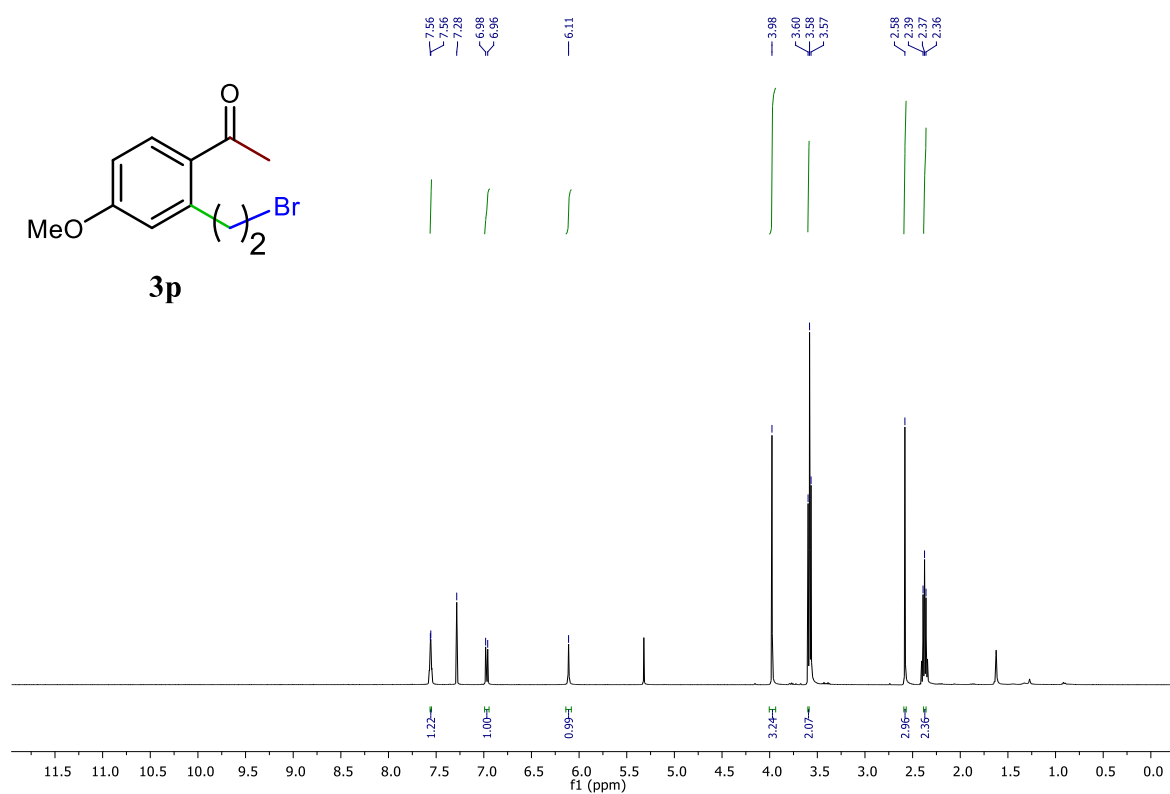

**$^{13}\text{C}$  NMR of 3p (101 MHz, 512 scans, RT,  $\text{CDCl}_3$ )**

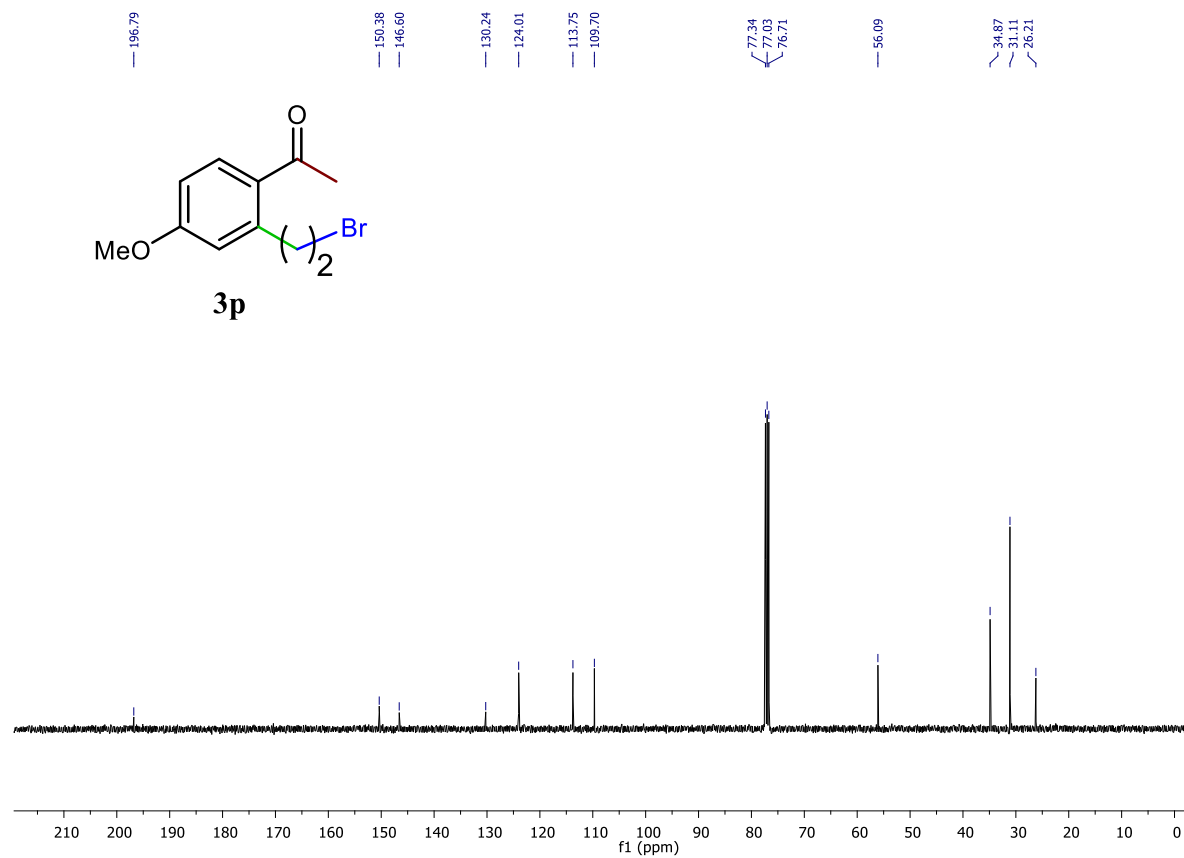



**$^1\text{H}$  NMR of 3q (400 MHz, 32 scans, RT,  $\text{CDCl}_3$ )**

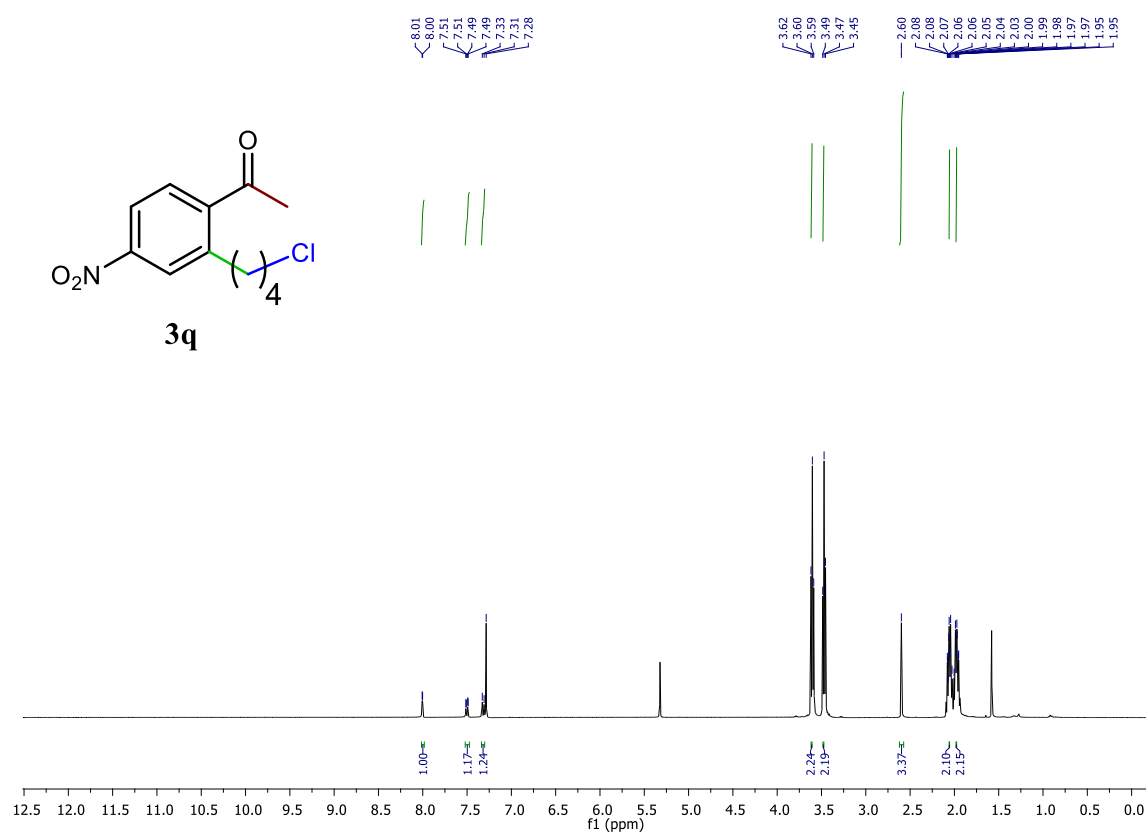

**$^{13}\text{C}$  NMR of 3q (101 MHz, 512 scans, RT,  $\text{CDCl}_3$ )**

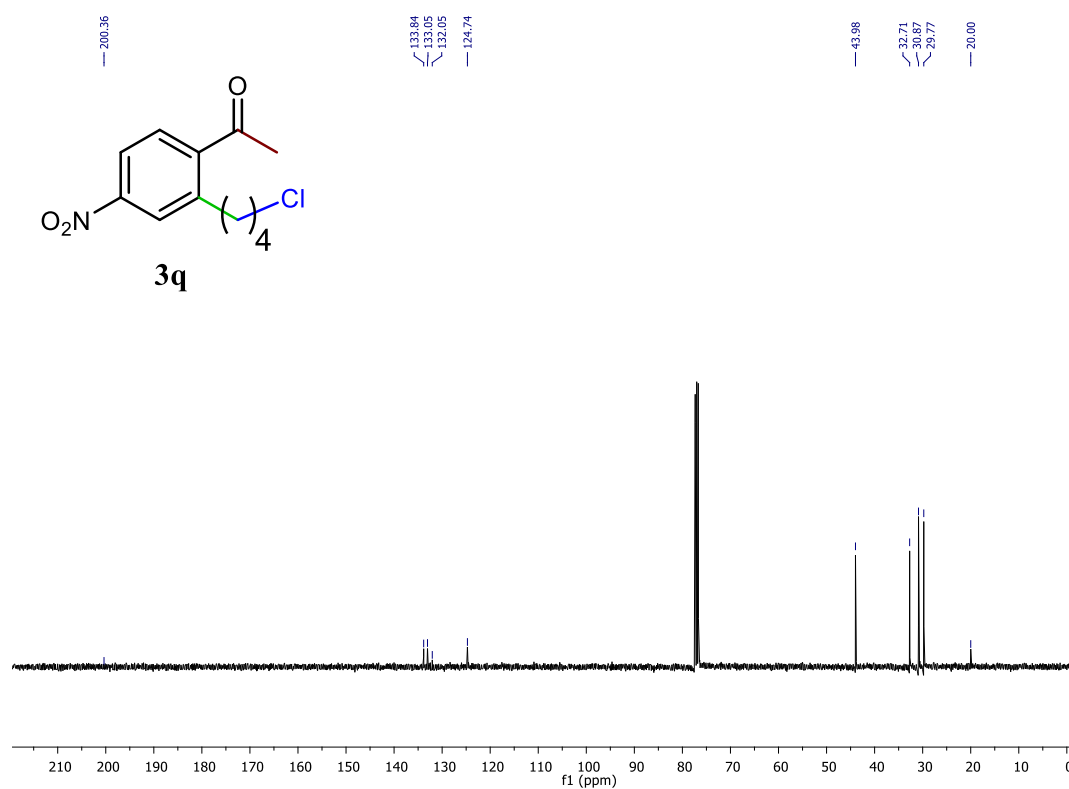

**<sup>1</sup>H NMR of 3r (400 MHz, 32 scans, RT, CDCl<sub>3</sub>)**

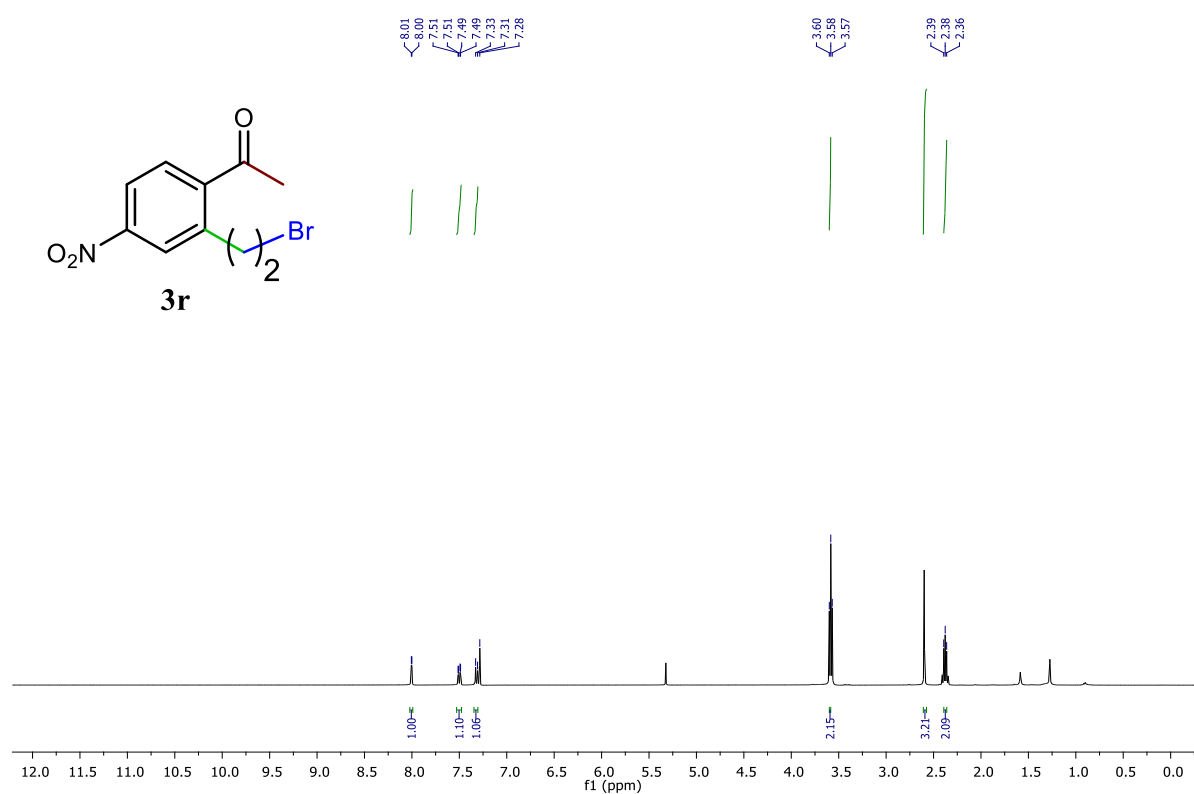

**<sup>13</sup>C NMR of 3r (101 MHz, 512 scans, RT, CDCl<sub>3</sub>)**

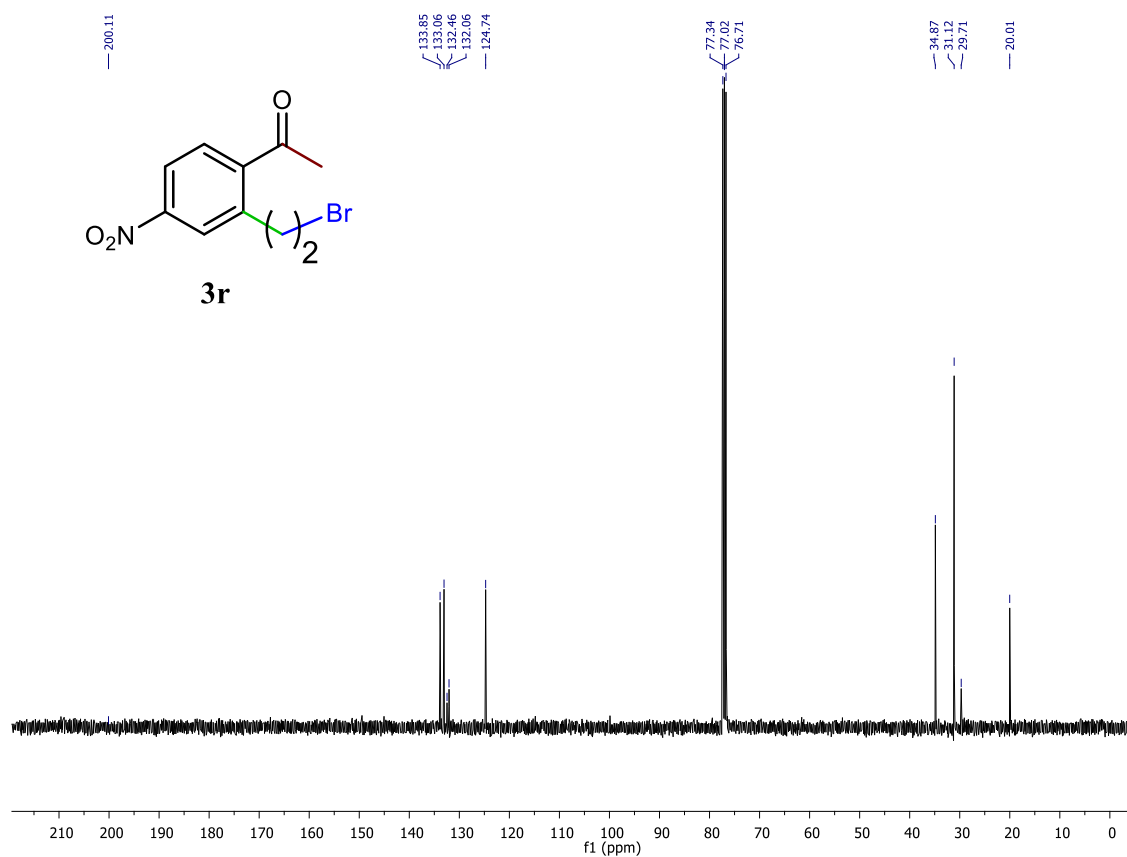

**$^1\text{H}$  NMR of 3s (400 MHz, 32 scans, RT,  $\text{CDCl}_3$ )**

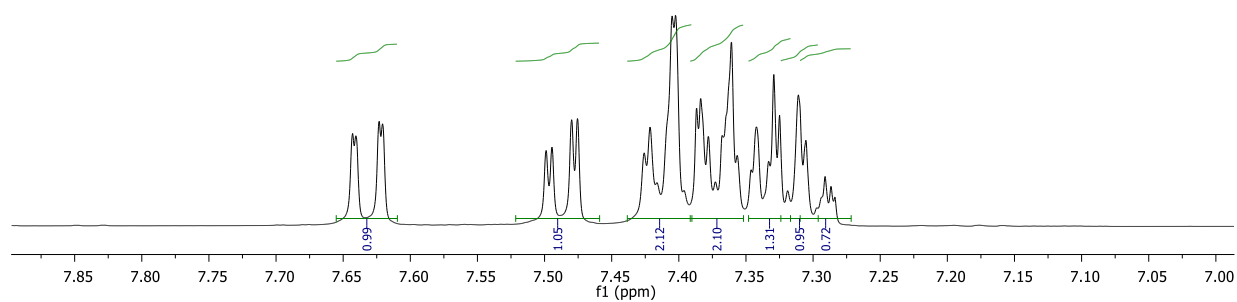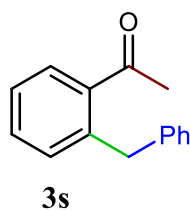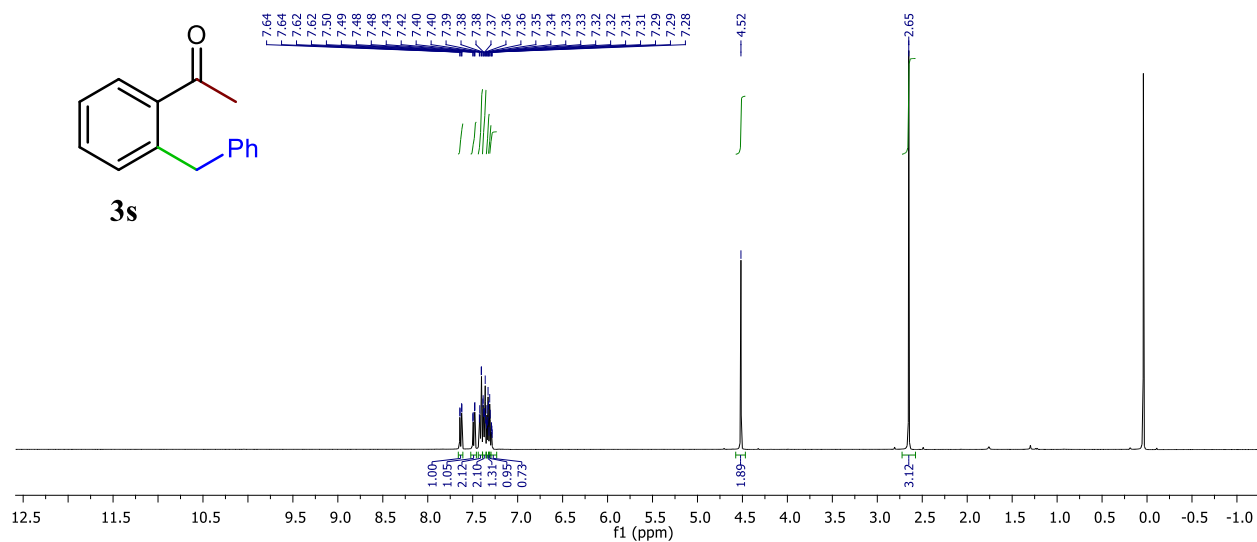

**$^{13}\text{C}$  NMR of 3s (101 MHz, 512 scans, RT,  $\text{CDCl}_3$ )**

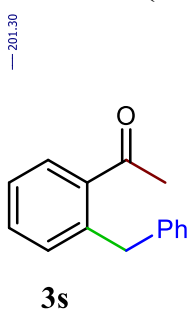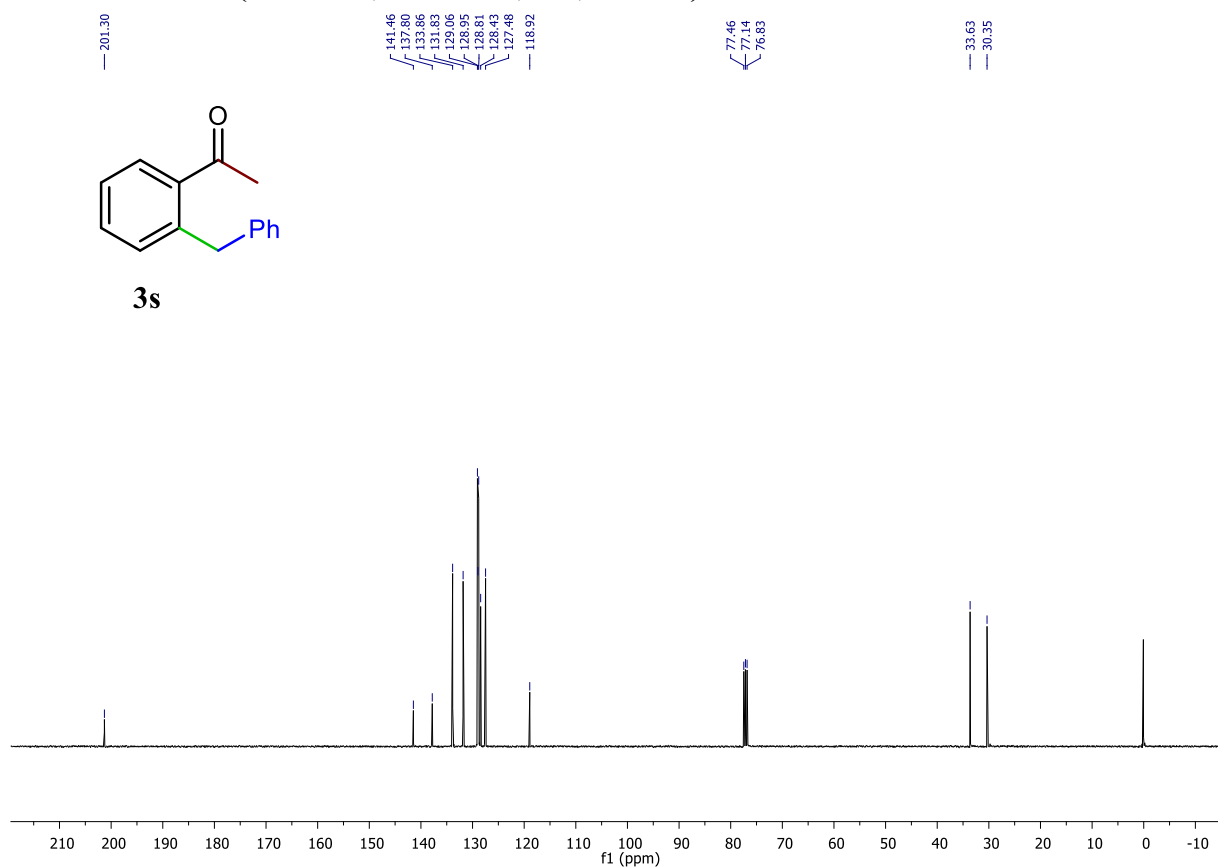

**<sup>1</sup>H NMR of 3t (400 MHz, 32 scans, RT, CDCl<sub>3</sub>)**

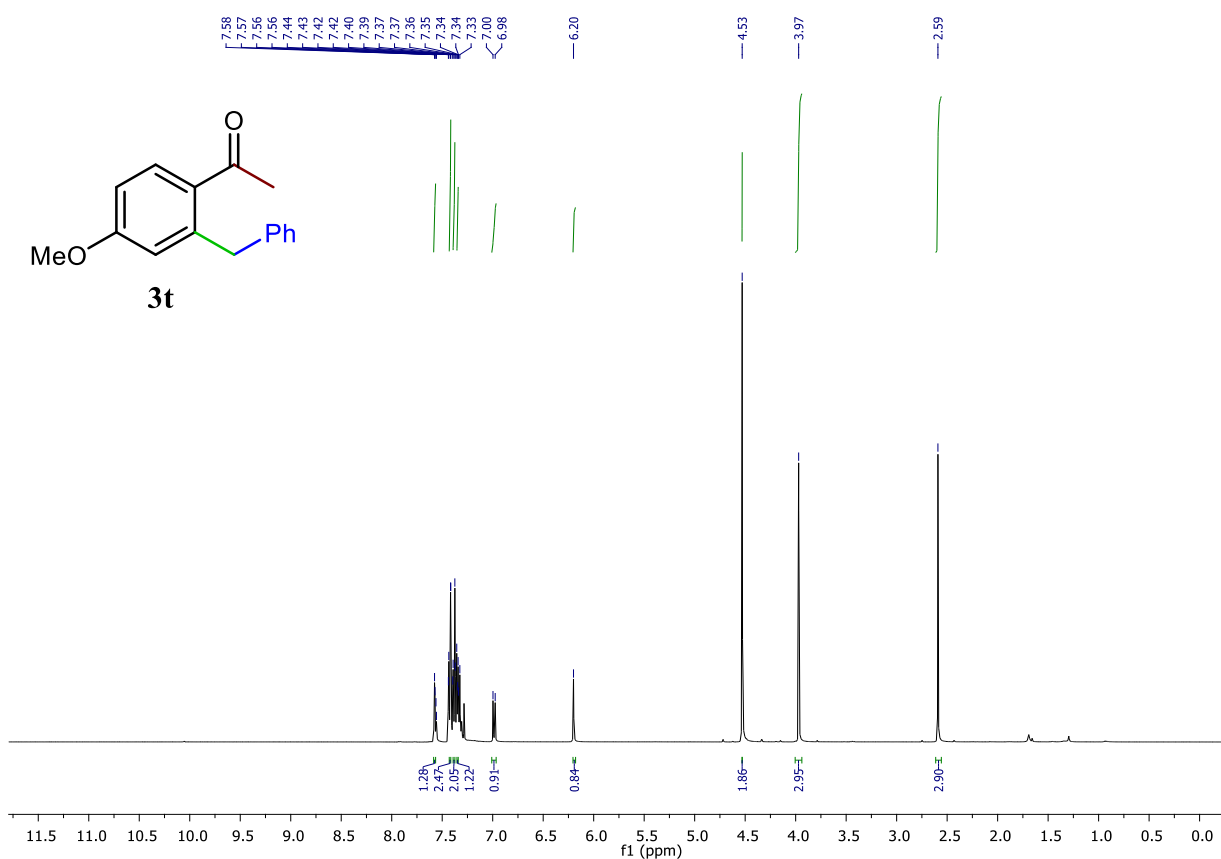

**<sup>13</sup>C NMR of 3t (101 MHz, 512**

**scans, RT, CDCl<sub>3</sub>)**

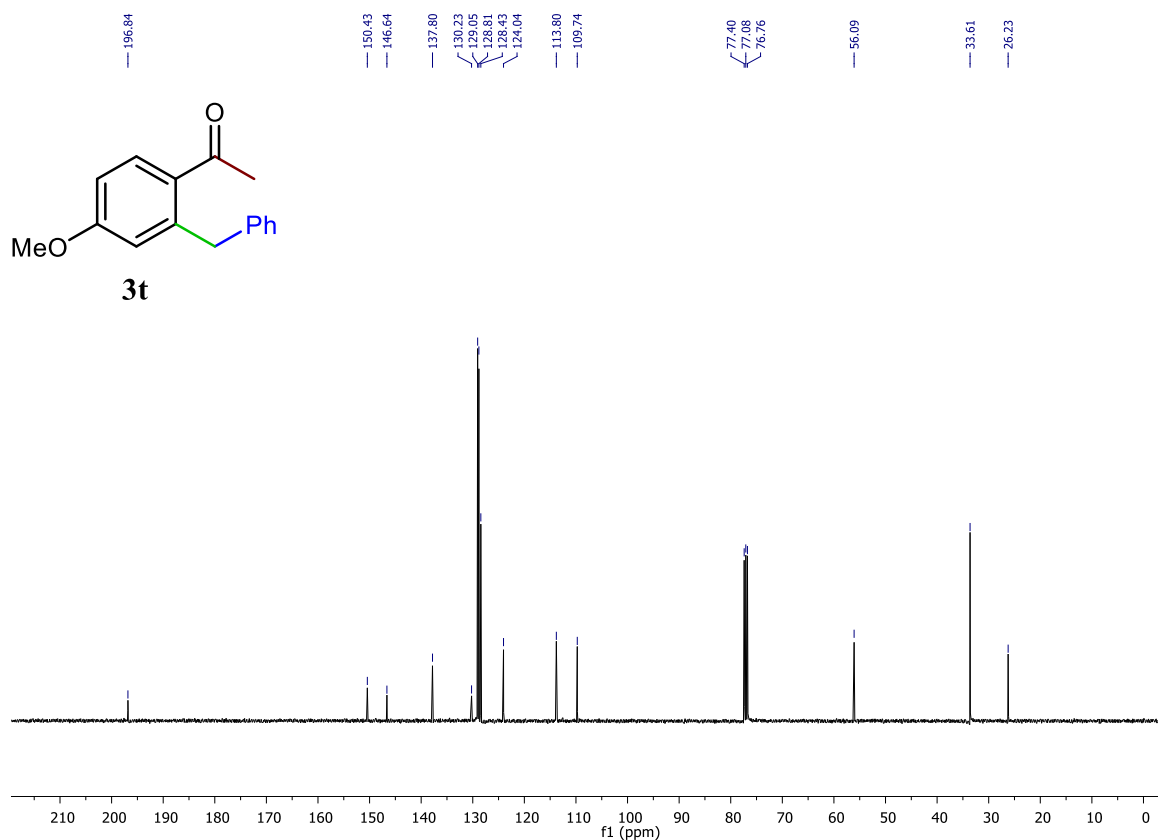

**<sup>1</sup>H NMR of 3u (400 MHz, 32 scans, RT, CDCl<sub>3</sub>)**

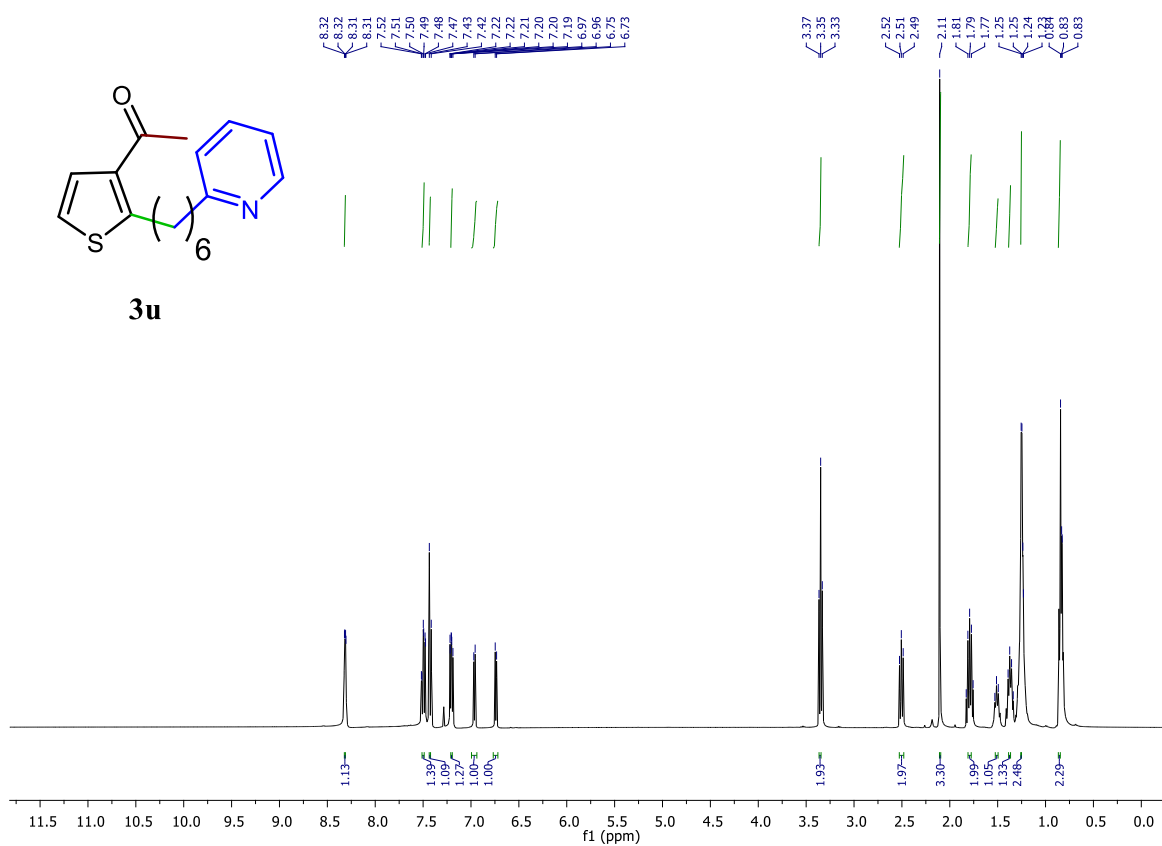

**<sup>13</sup>C NMR of 3u (101 MHz, 512 scans, RT, CDCl<sub>3</sub>)**

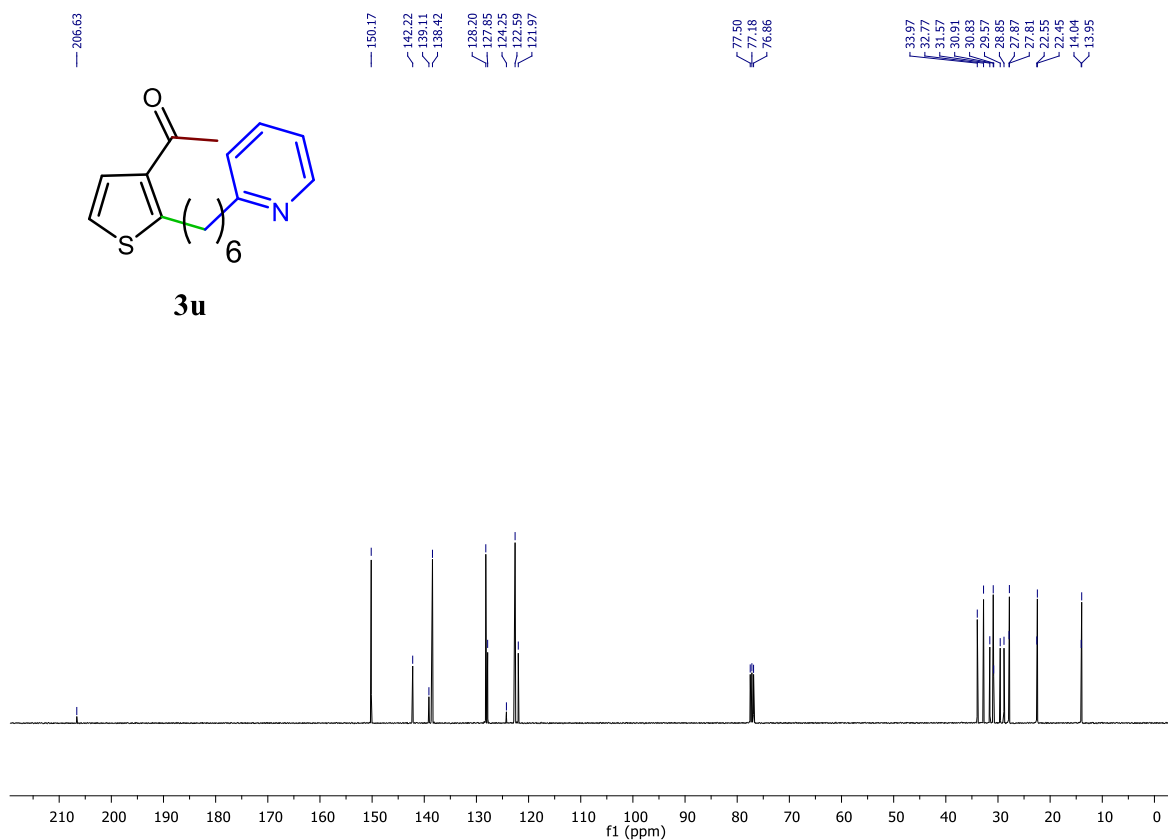

**<sup>1</sup>H NMR of 3v (400 MHz, 32 scans, RT, CDCl<sub>3</sub>)**

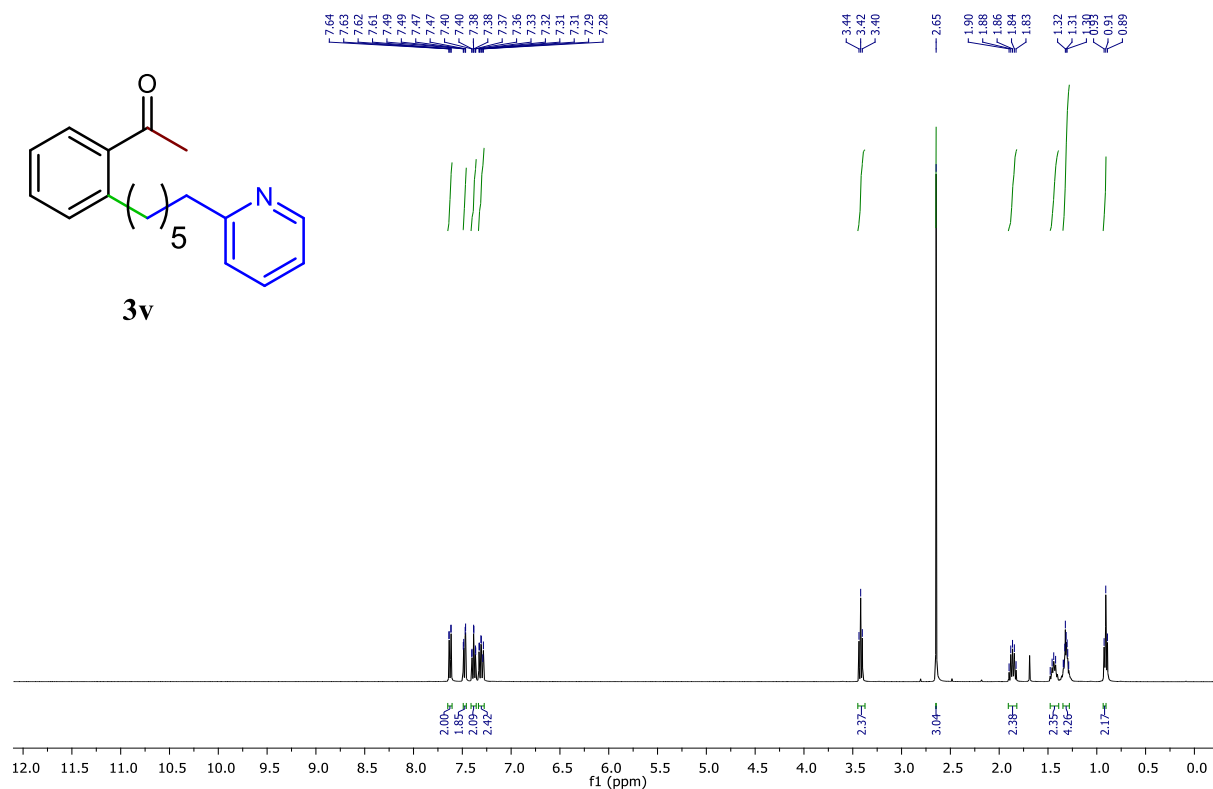

**<sup>13</sup>C NMR of 3v (101 MHz, 512 scans, RT, CDCl<sub>3</sub>)**

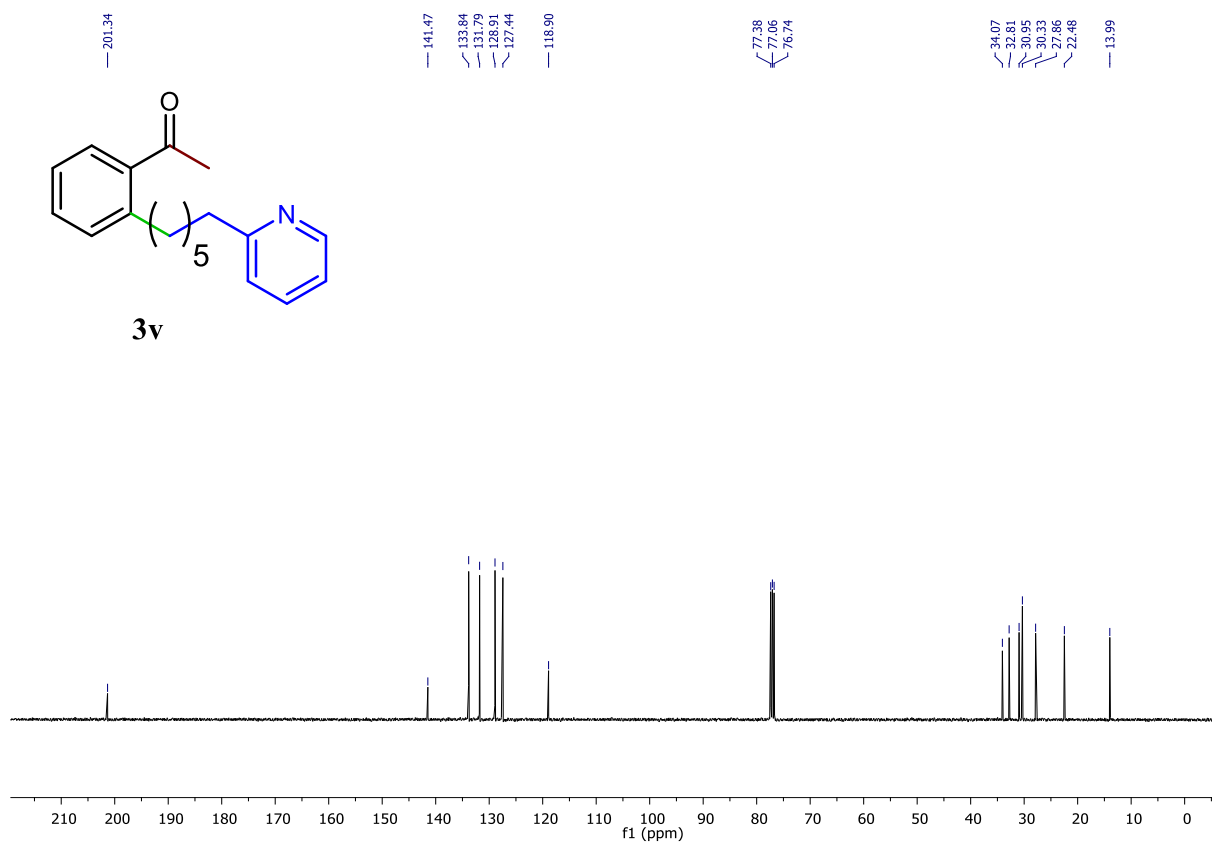

**<sup>1</sup>H NMR of 3w (400 MHz, 32 scans, RT, CDCl<sub>3</sub>)**

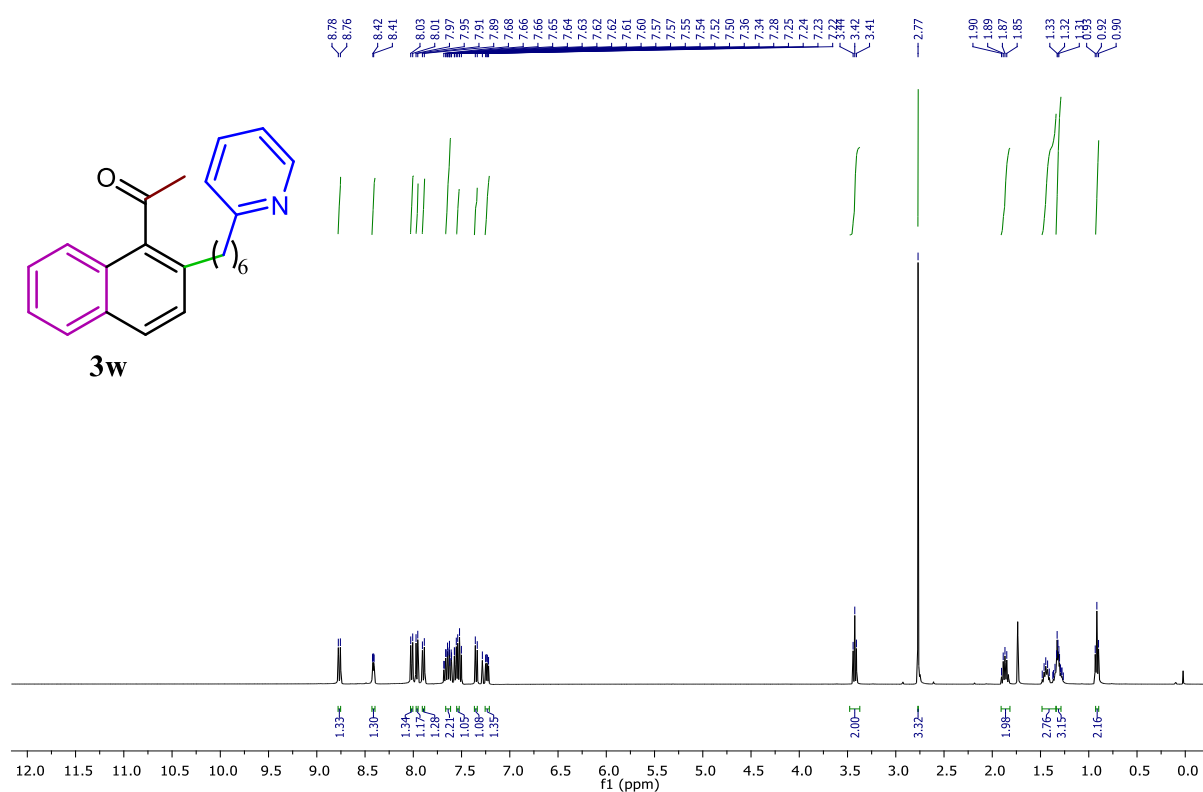

**<sup>13</sup>C NMR of 3w (101 MHz, 512 scans, RT, CDCl<sub>3</sub>)**

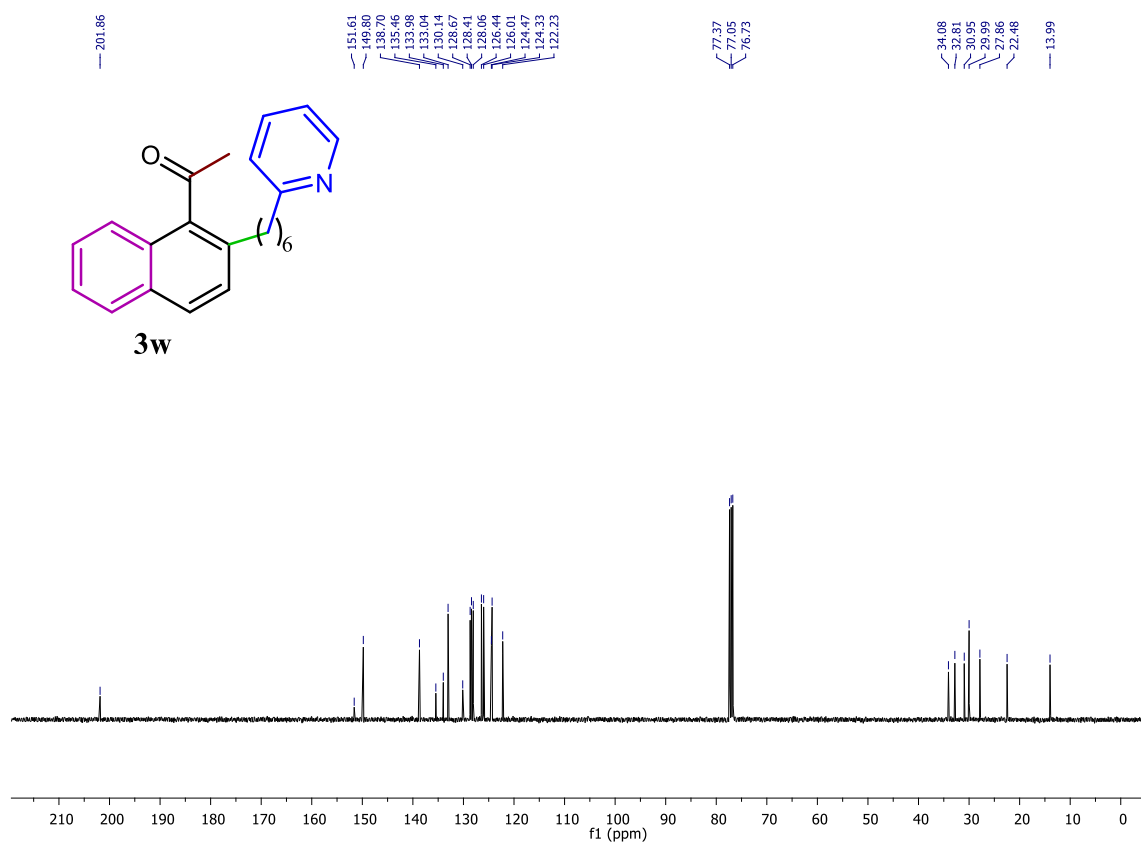



**$^1\text{H}$  NMR of 3x (400 MHz, 32 scans, RT,  $\text{CDCl}_3$ )**

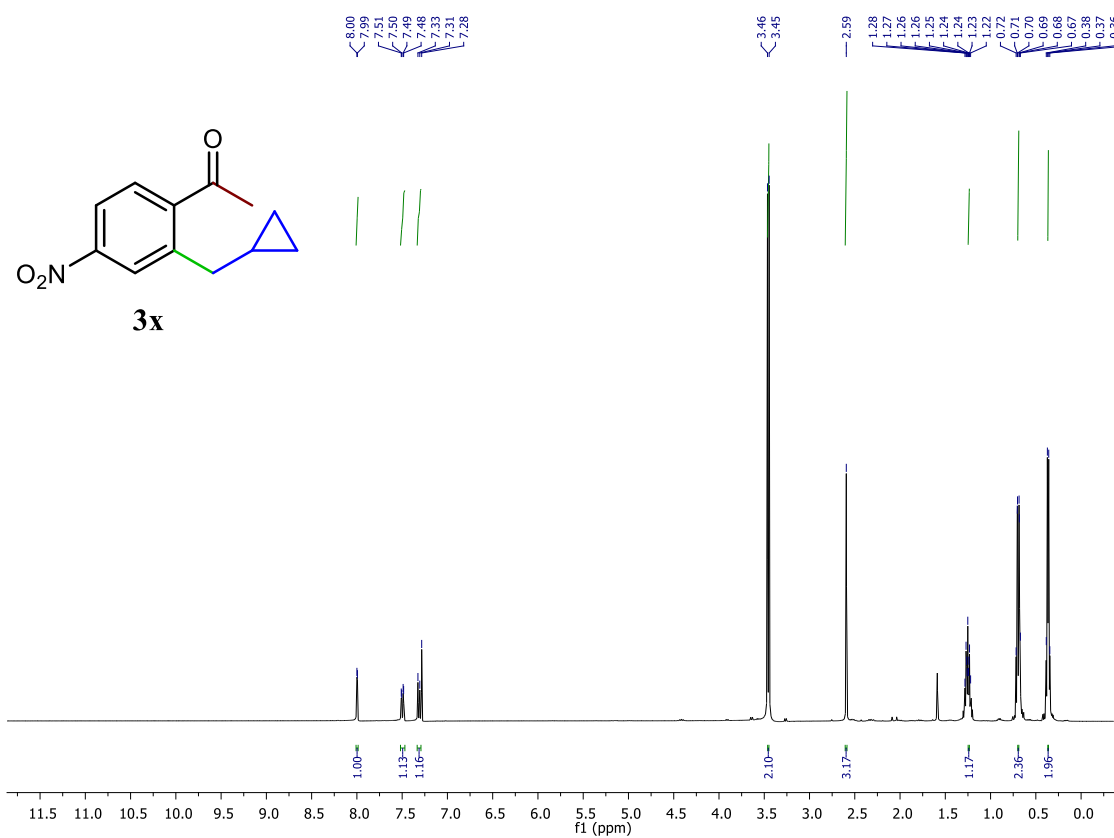

**$^{13}\text{C}$  NMR of 3x (101 MHz, 512 scans, RT,  $\text{CDCl}_3$ )**

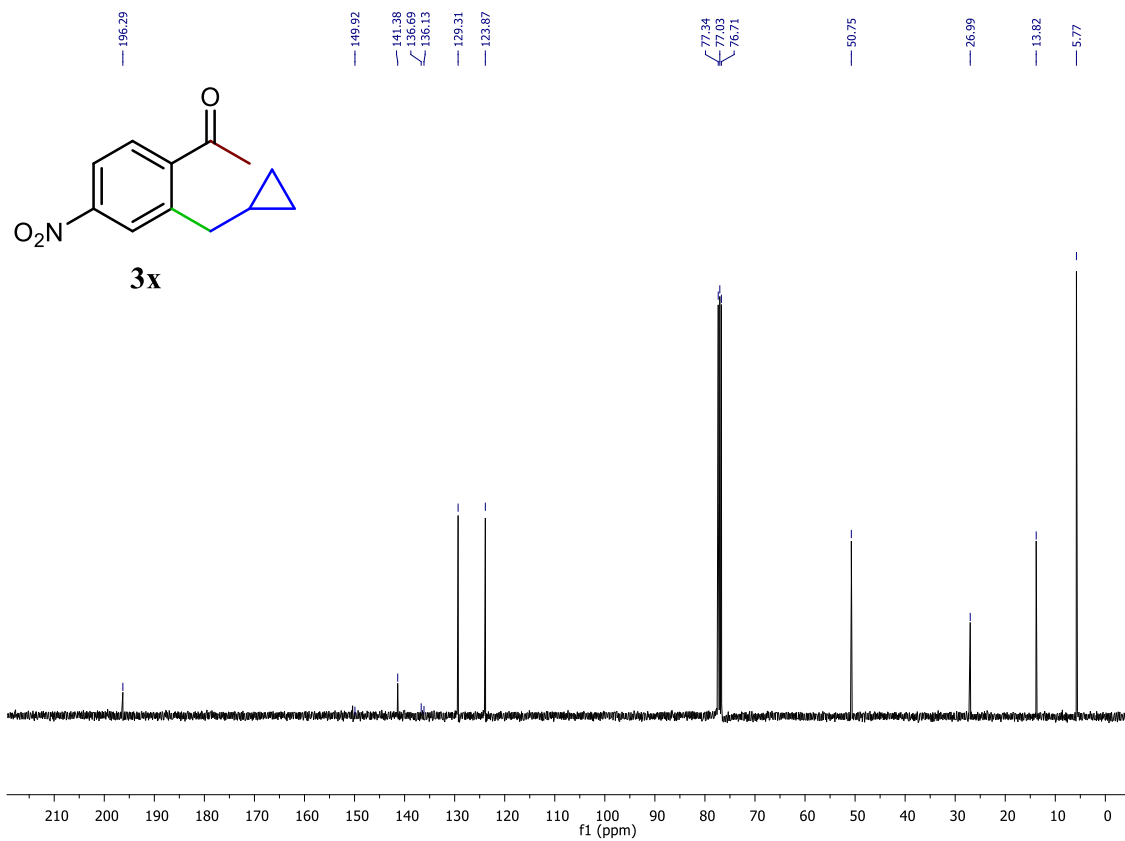

**$^1\text{H}$  NMR of 3y (400 MHz, 32 scans, RT,  $\text{CDCl}_3$ )**

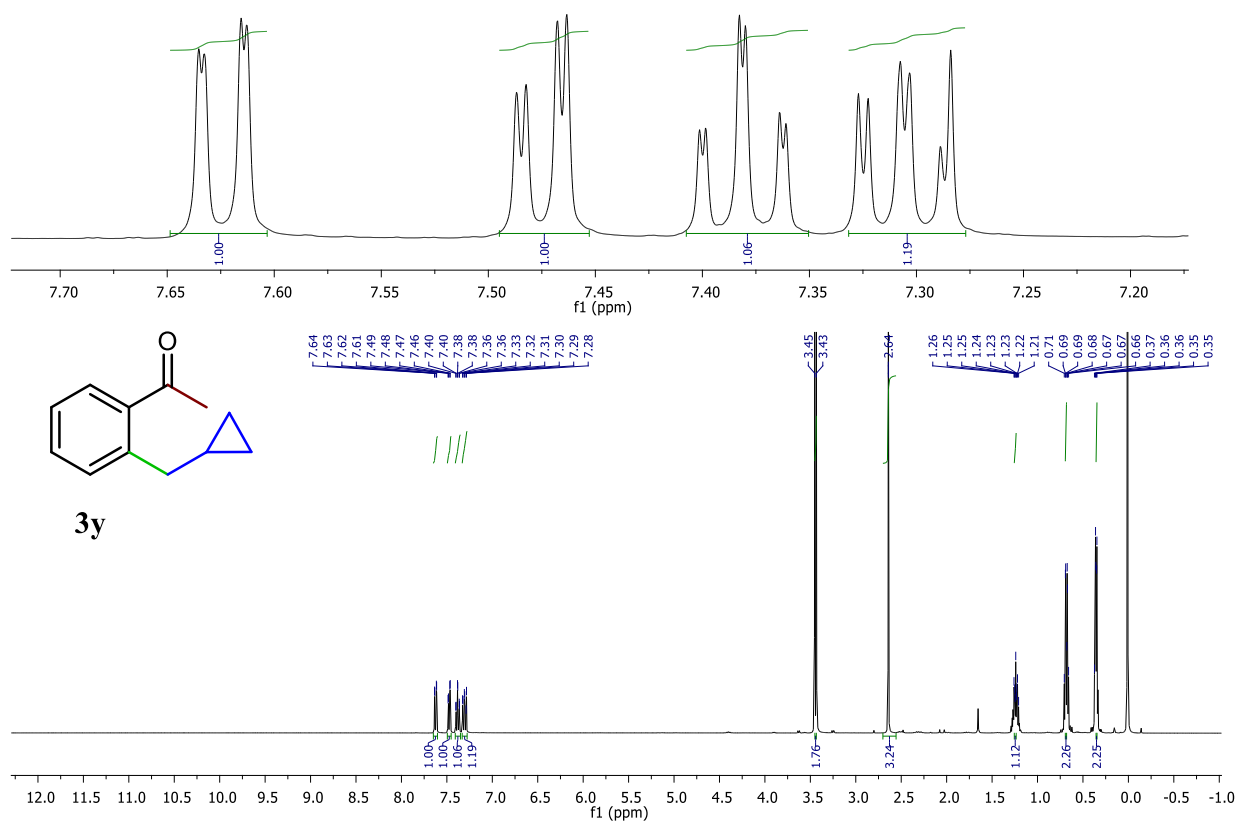

**$^{13}\text{C}$  NMR of 3y (101 MHz, 512 scans, RT,  $\text{CDCl}_3$ )**

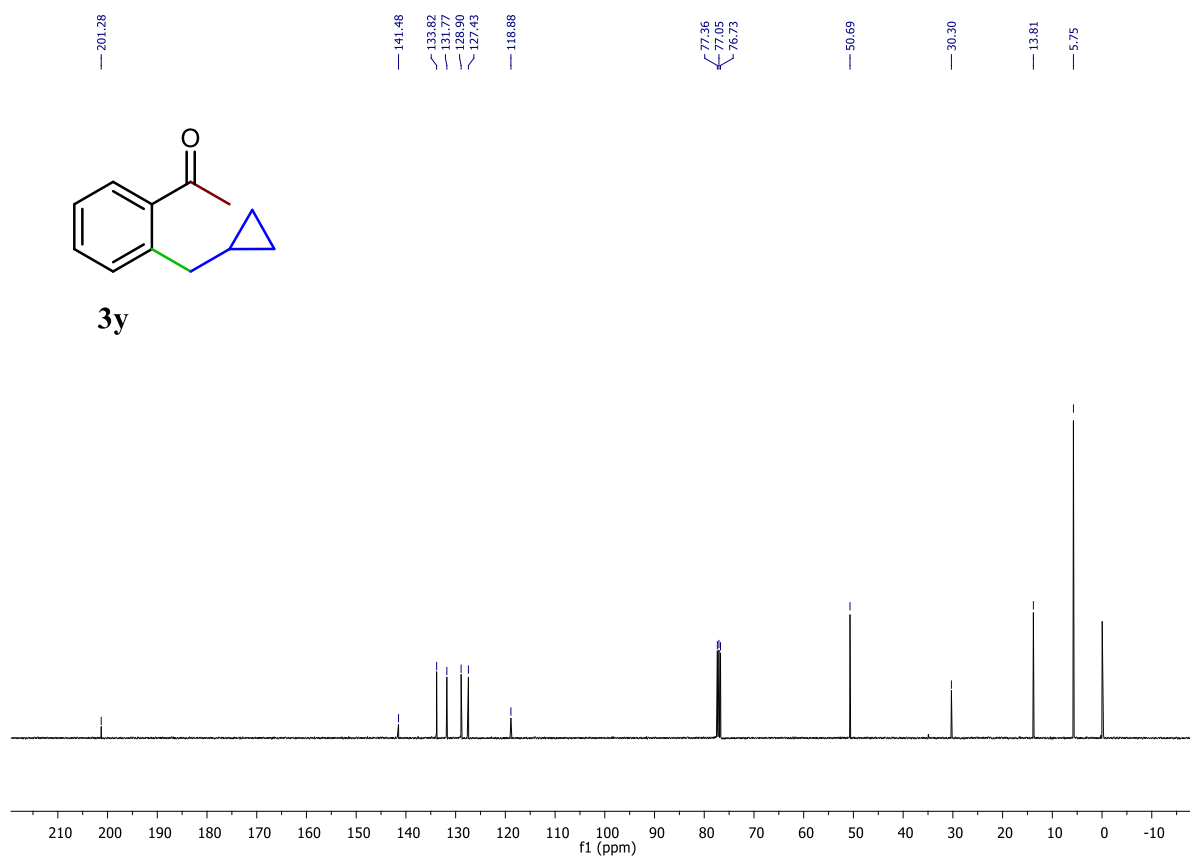

**<sup>1</sup>H NMR of 3z (400 MHz, 32 scans, RT, CDCl<sub>3</sub>)**

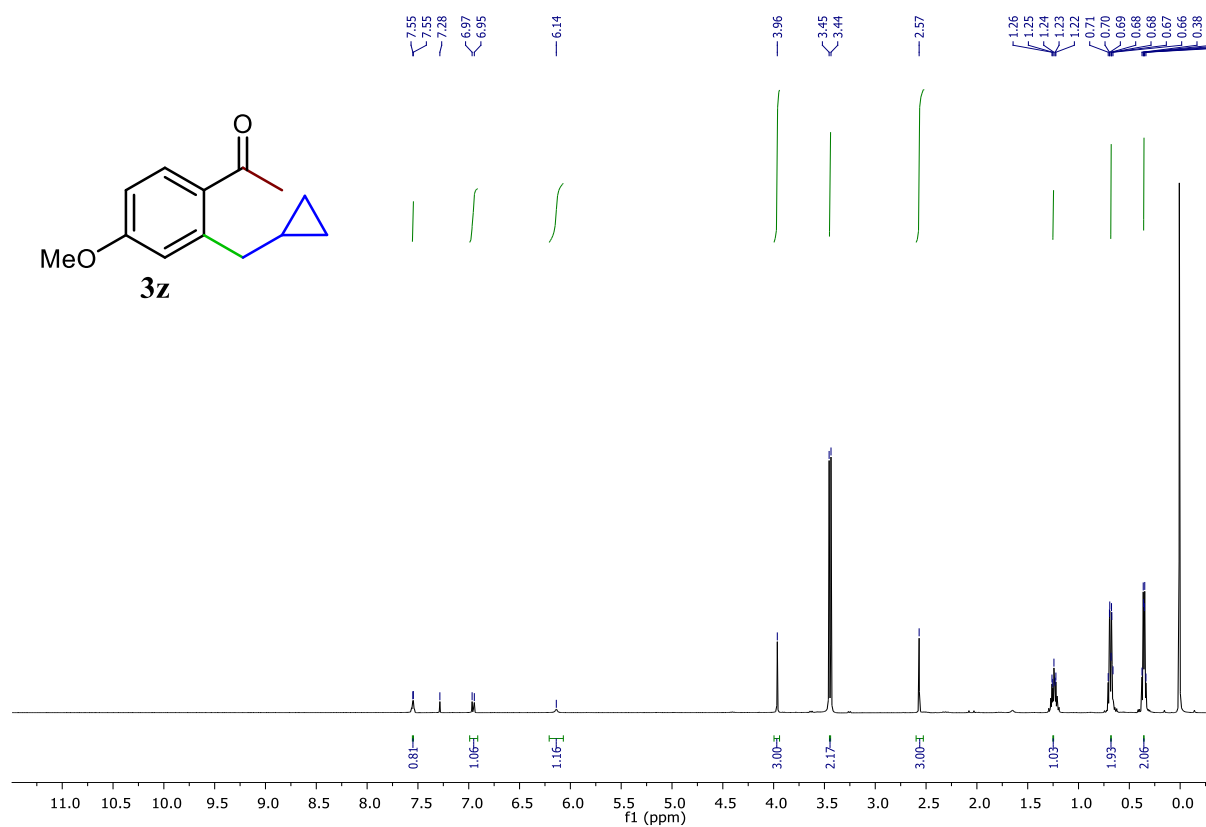

**<sup>13</sup>C NMR of 3z (101 MHz, 512 scans, RT, CDCl<sub>3</sub>)**

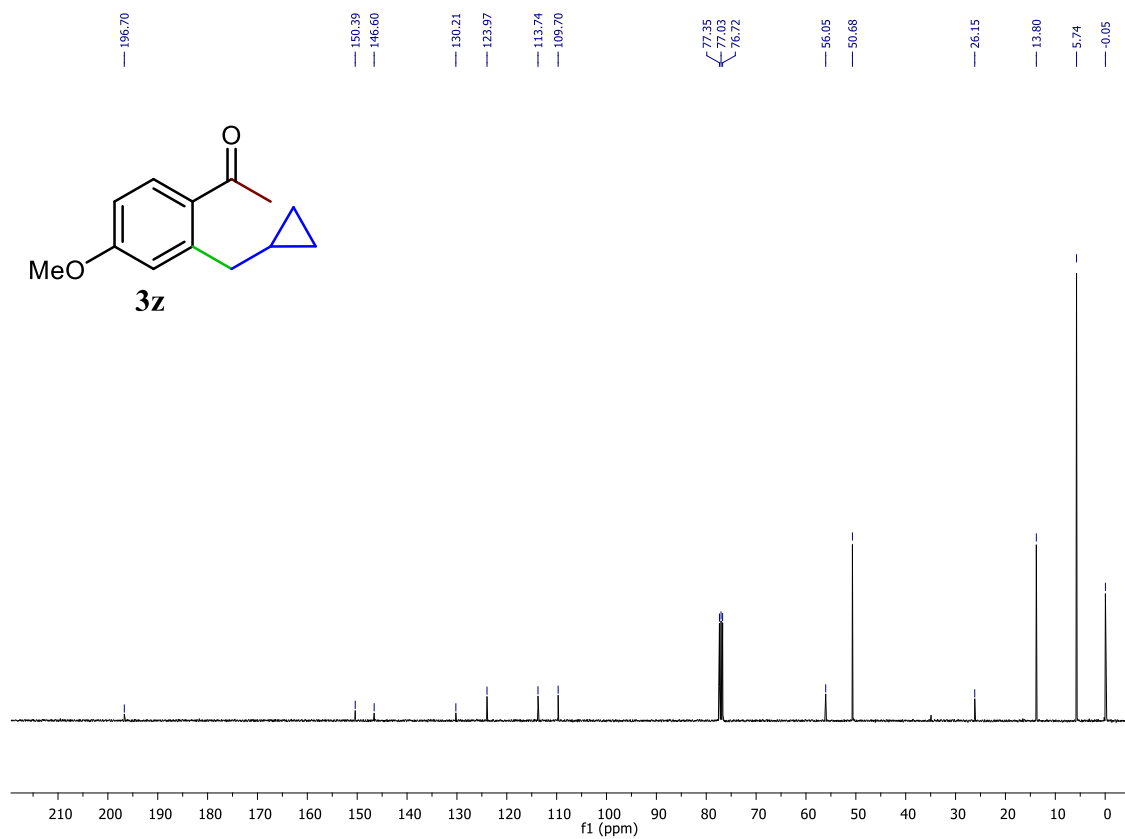

**$^1\text{H}$  NMR of 3aa (400 MHz, 32 scans, RT,  $\text{CDCl}_3$ )**

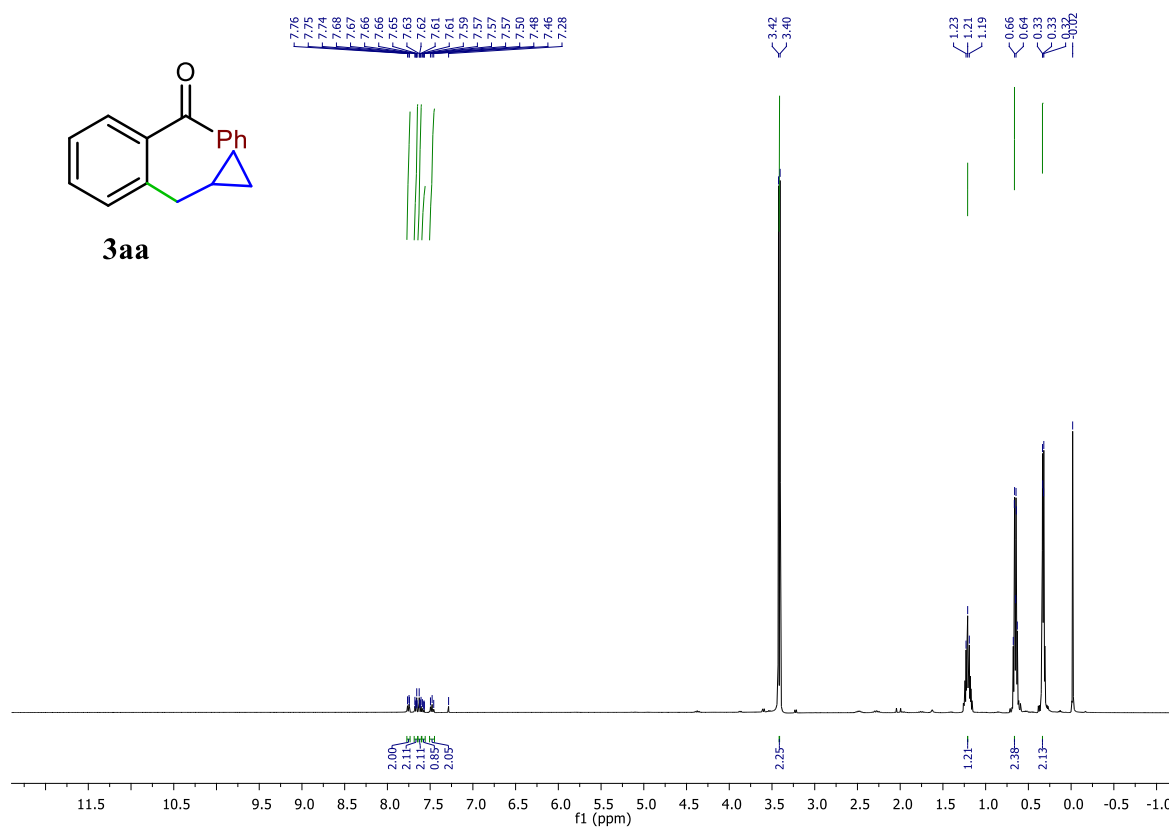

**$^{13}\text{C}$  NMR of 3aa (101 MHz, 512 scans, RT,  $\text{CDCl}_3$ )**

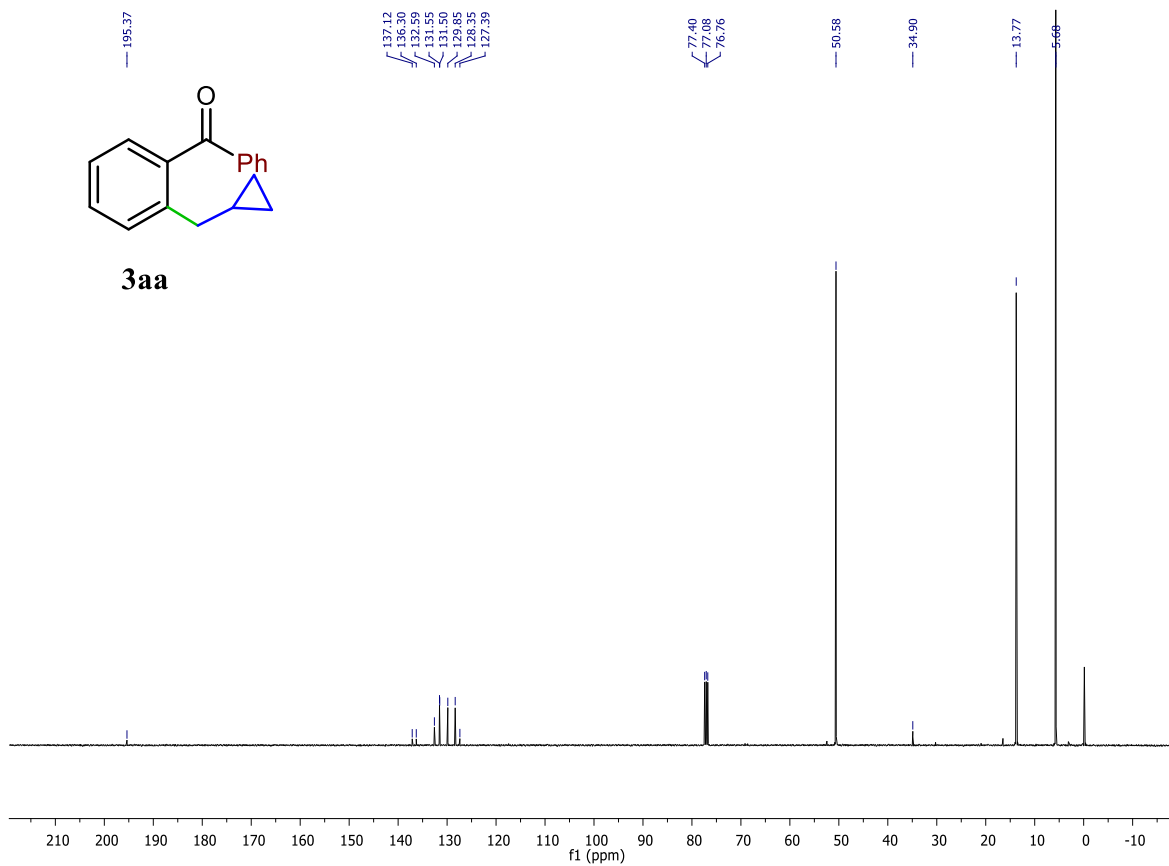

**$^1\text{H}$  NMR of 3ab (400 MHz, 32 scans, RT,  $\text{CDCl}_3$ )**

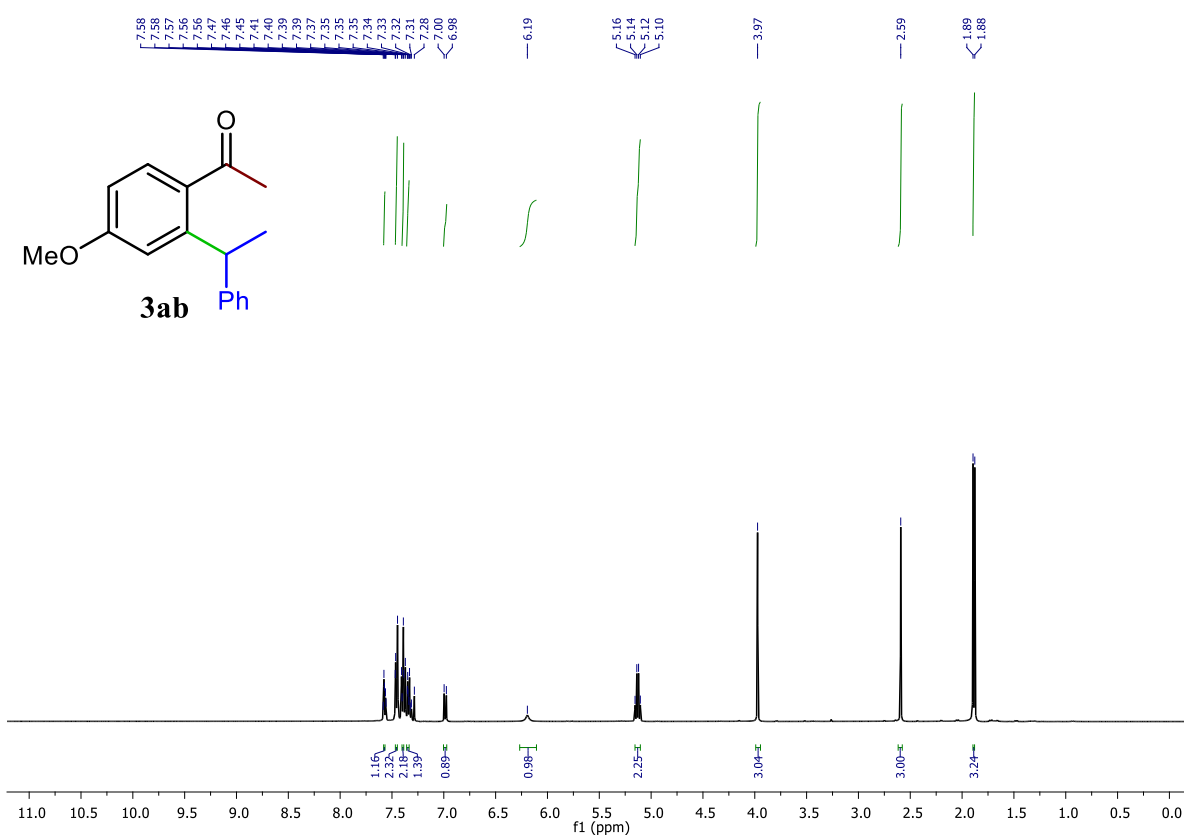

**$^{13}\text{C}$  NMR of 3ab (101 MHz, 512 scans, RT,  $\text{CDCl}_3$ )**

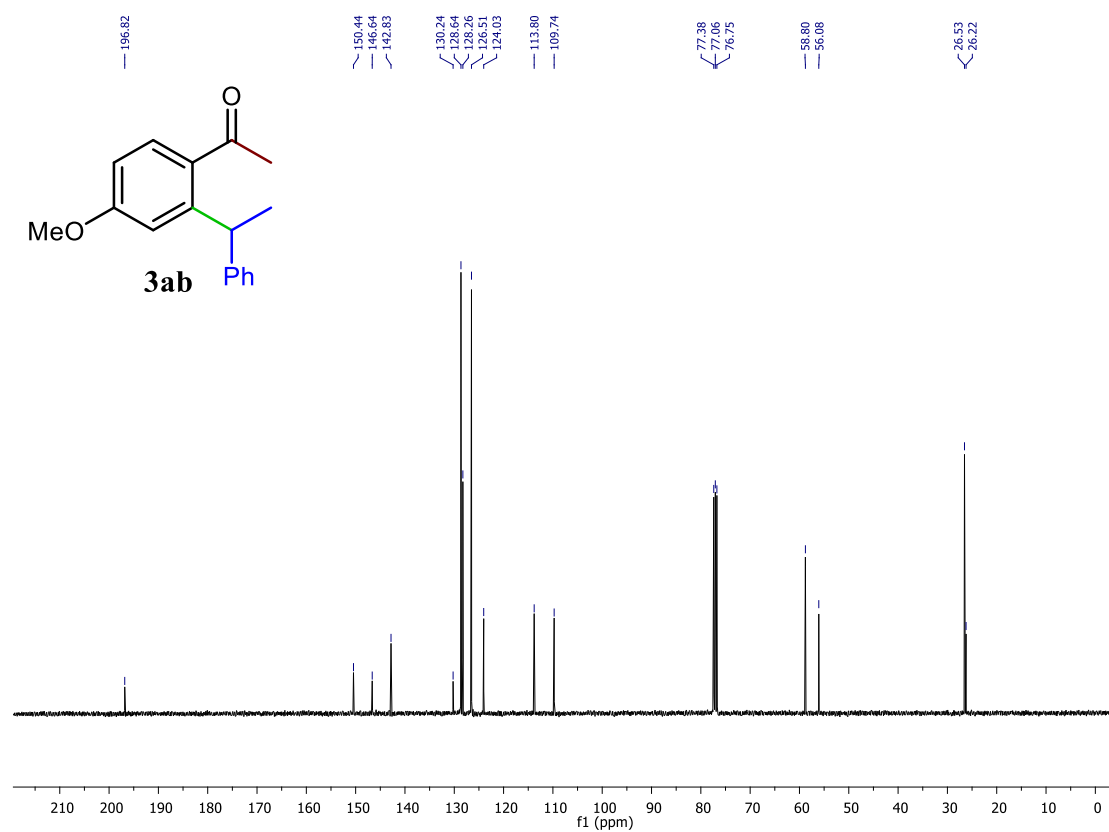

**$^1\text{H}$  NMR of 3ac (400 MHz, 32 scans, RT,  $\text{CDCl}_3$ )**

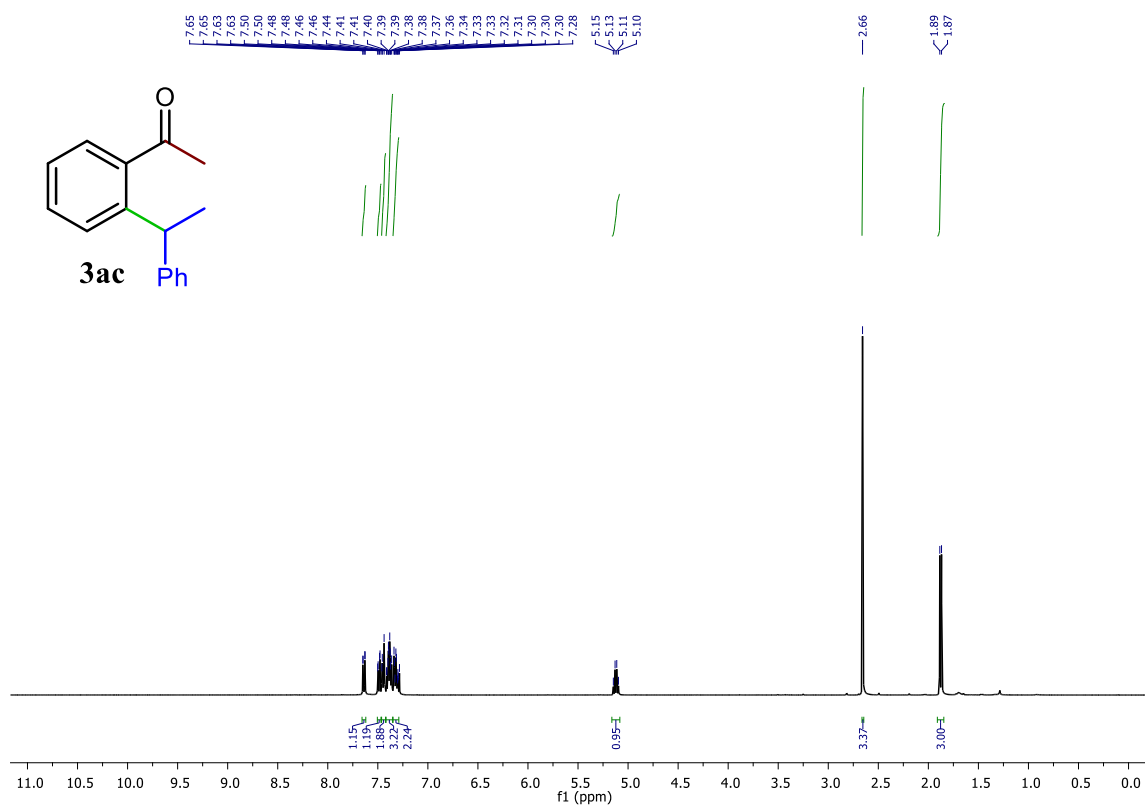

**$^{13}\text{C}$  NMR of 3ac (101 MHz, 512 scans, RT,  $\text{CDCl}_3$ )**

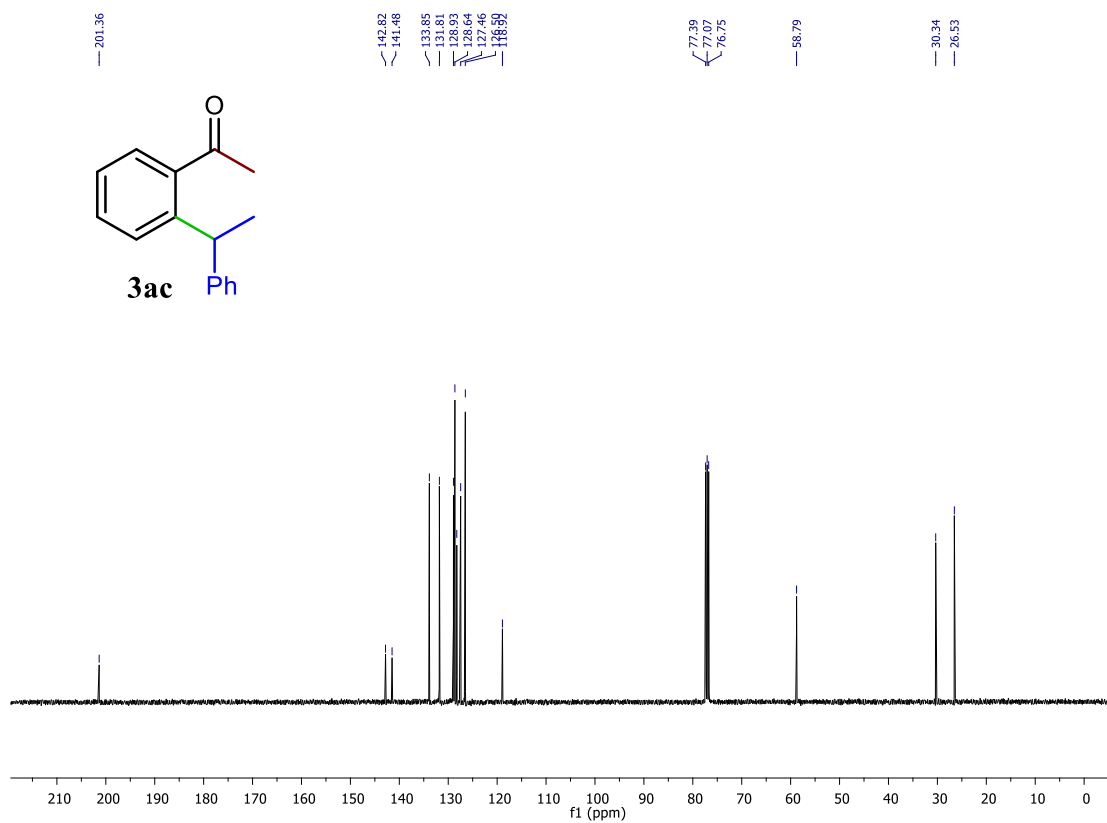

**$^1\text{H}$  NMR of 3ad (400 MHz, 32 scans, RT,  $\text{CDCl}_3$ )**

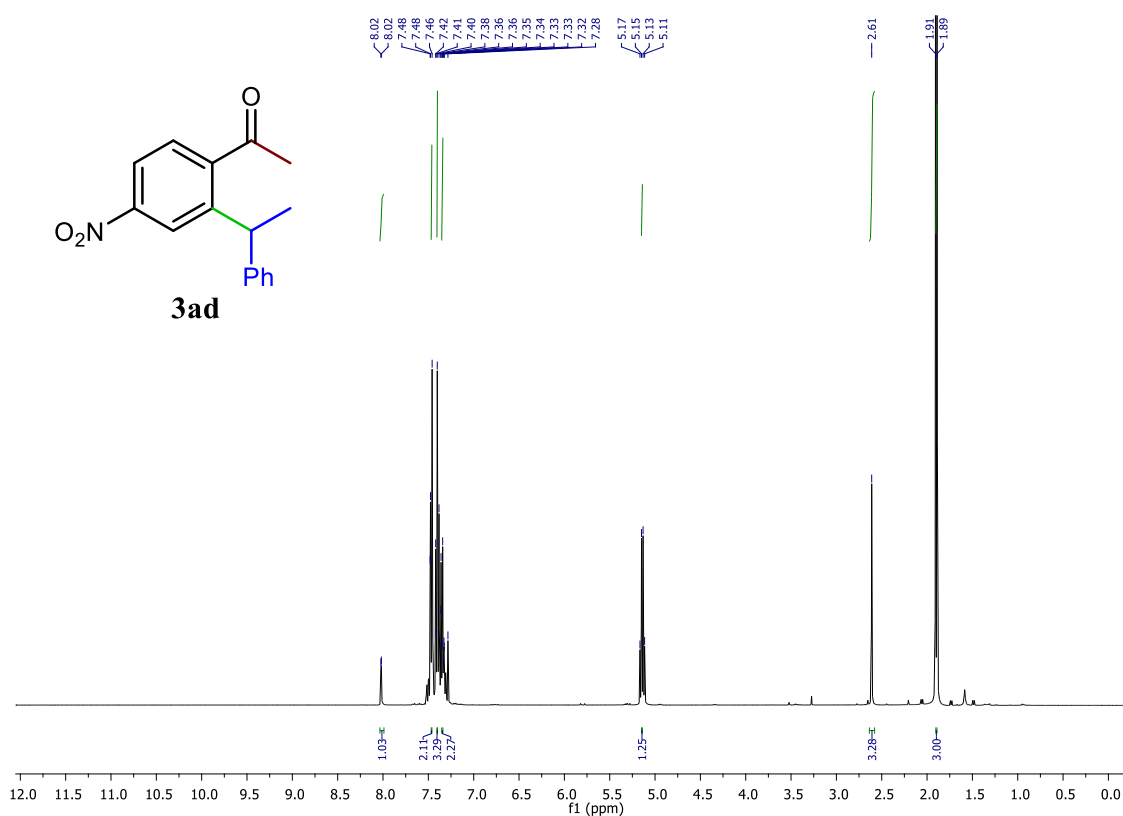

**$^{13}\text{C}$  NMR of 3ad (101 MHz, 512 scans, RT,  $\text{CDCl}_3$ )**

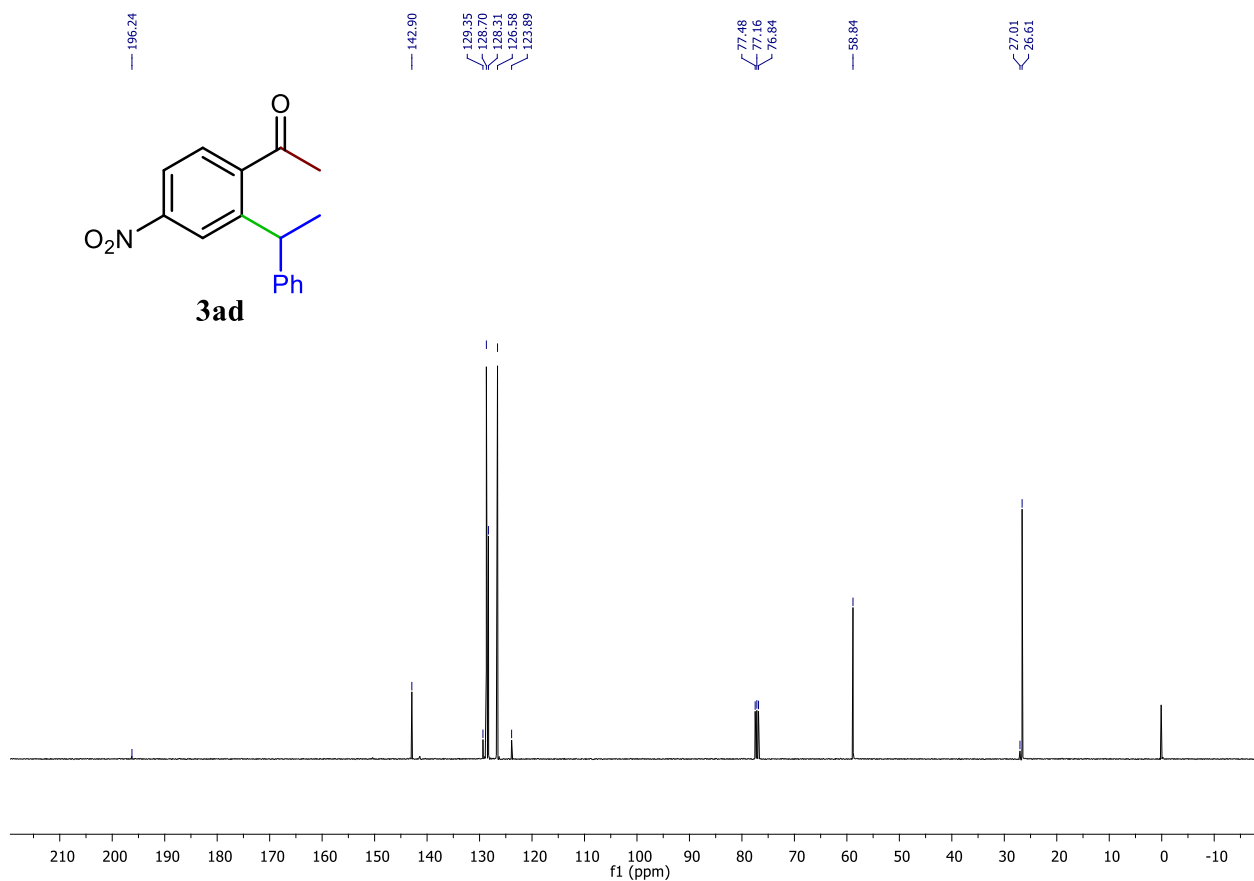

**$^1\text{H}$  NMR of 3ae (400 MHz, 32 scans, RT,  $\text{CDCl}_3$ )**

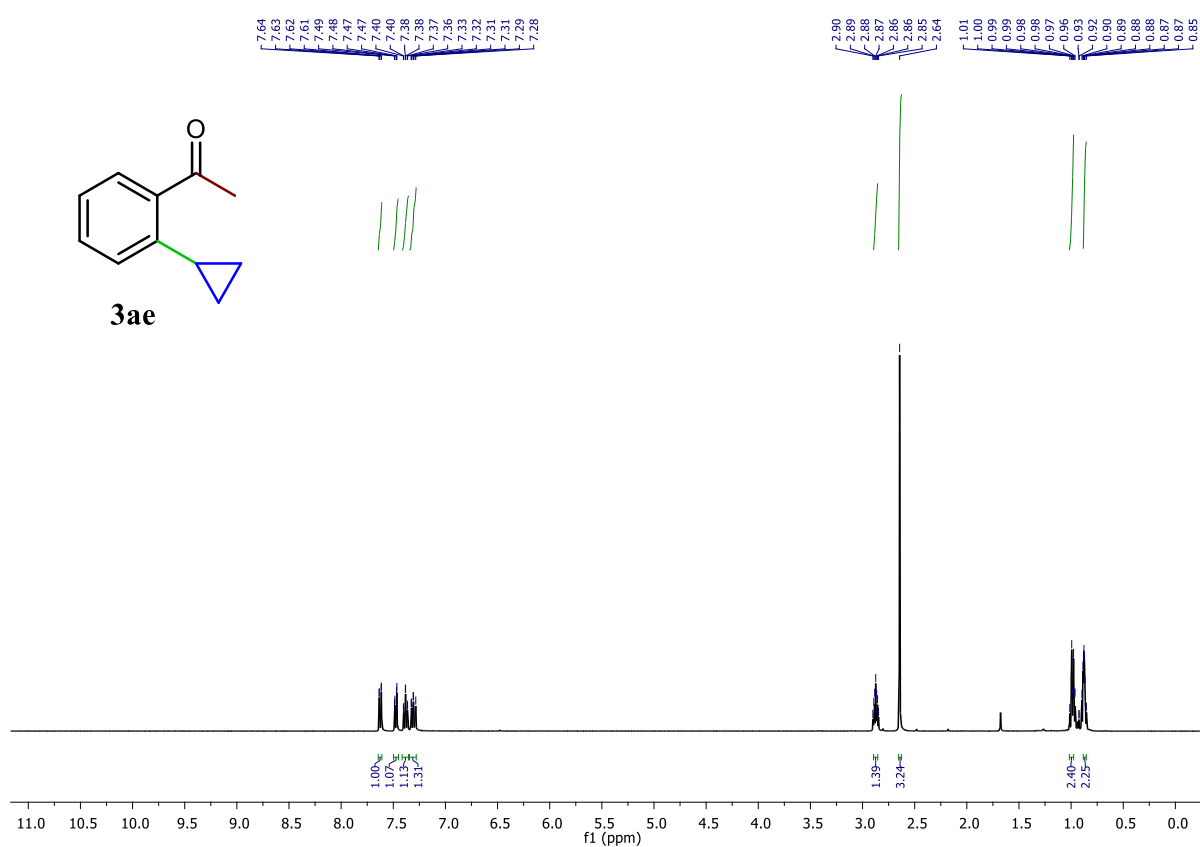

**$^{13}\text{C}$  NMR of 3ae (101 MHz, 512 scans, RT,  $\text{CDCl}_3$ )**

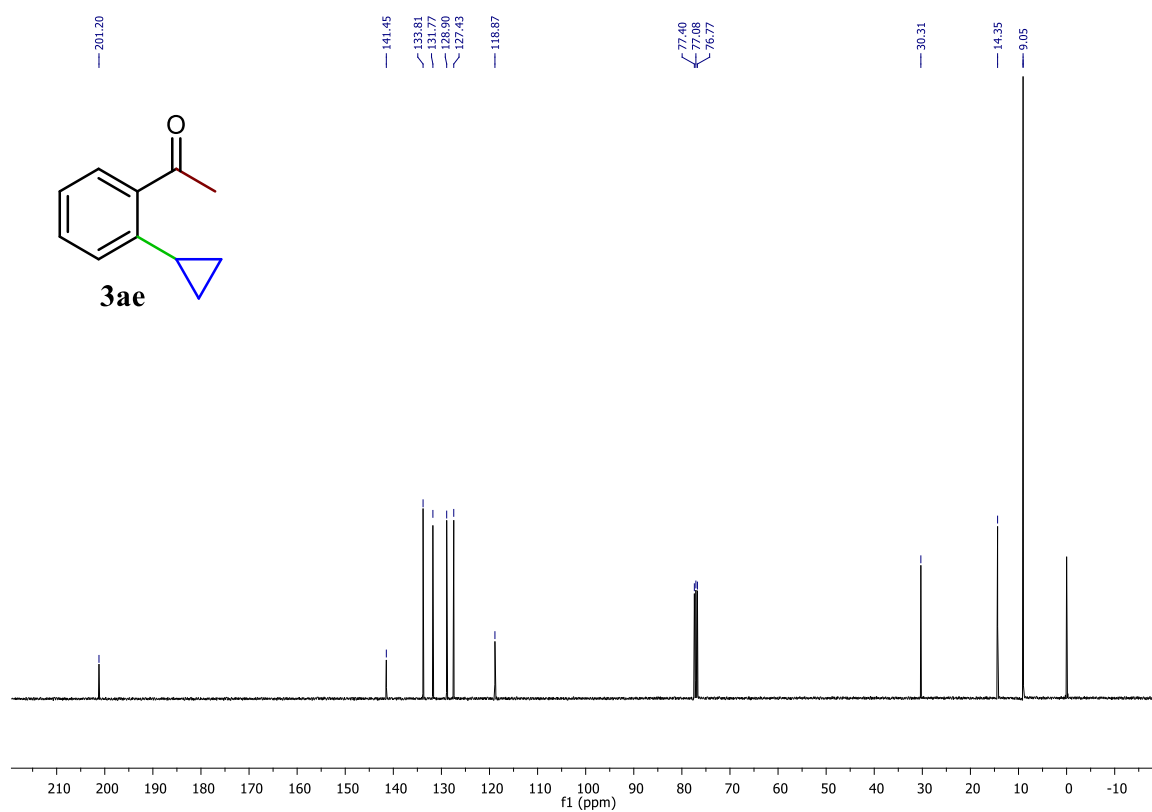



**$^1\text{H}$  NMR of 3af (400 MHz, 32 scans, RT,  $\text{CDCl}_3$ )**

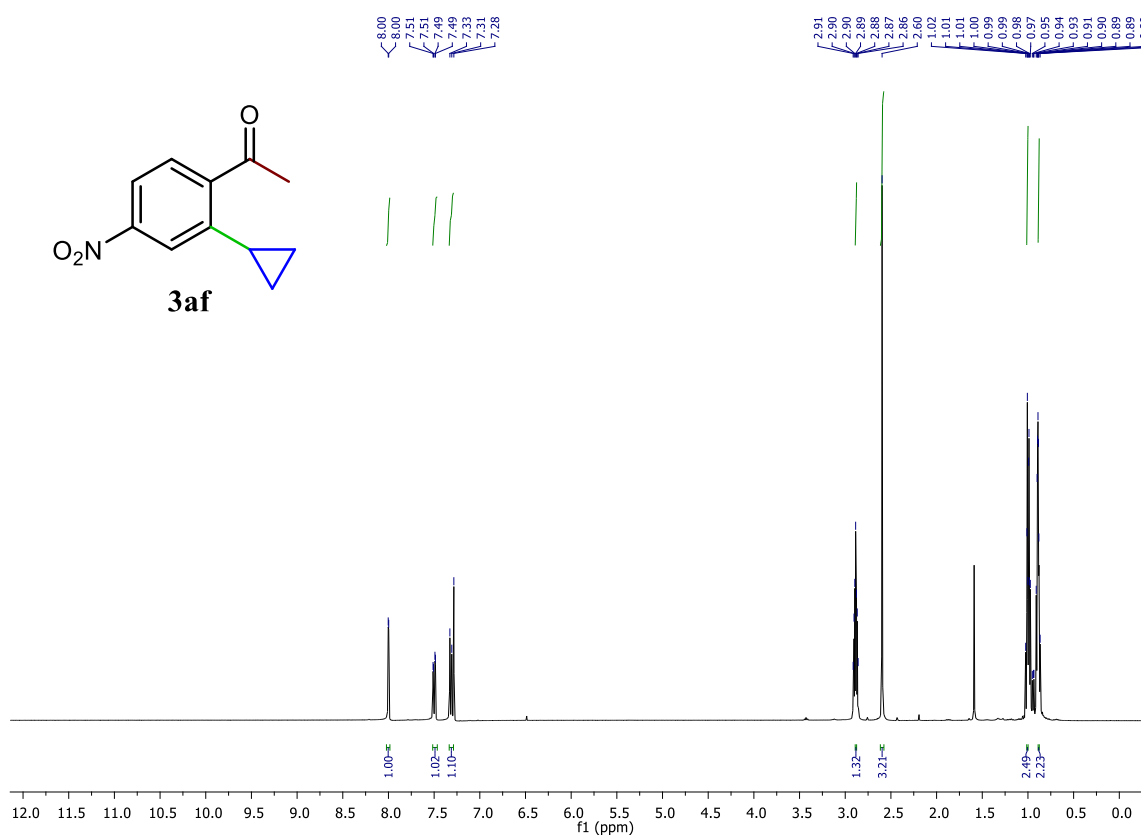

**$^{13}\text{C}$  NMR of 3af (101 MHz, 512 scans, RT,  $\text{CDCl}_3$ )**

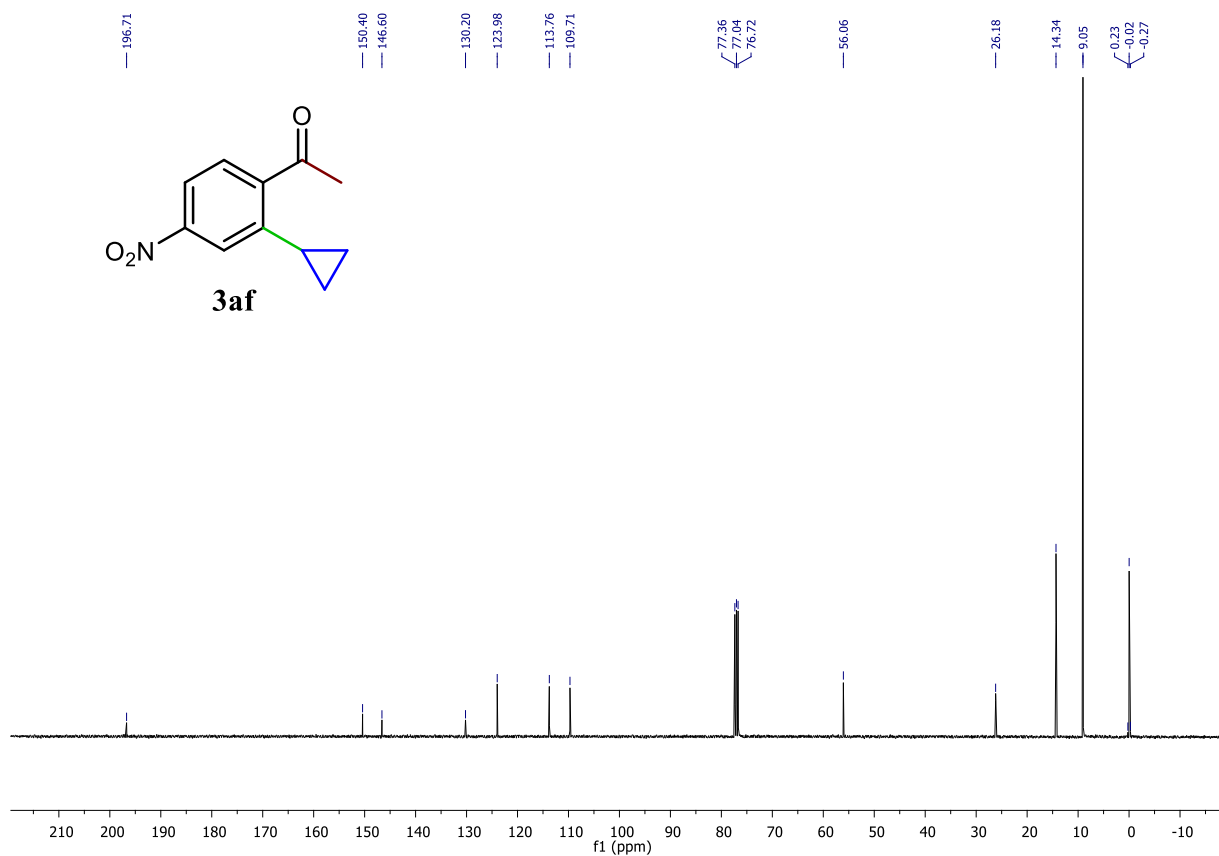

**$^1\text{H}$  NMR of 3ag (400 MHz, 32 scans, RT,  $\text{CDCl}_3$ )**

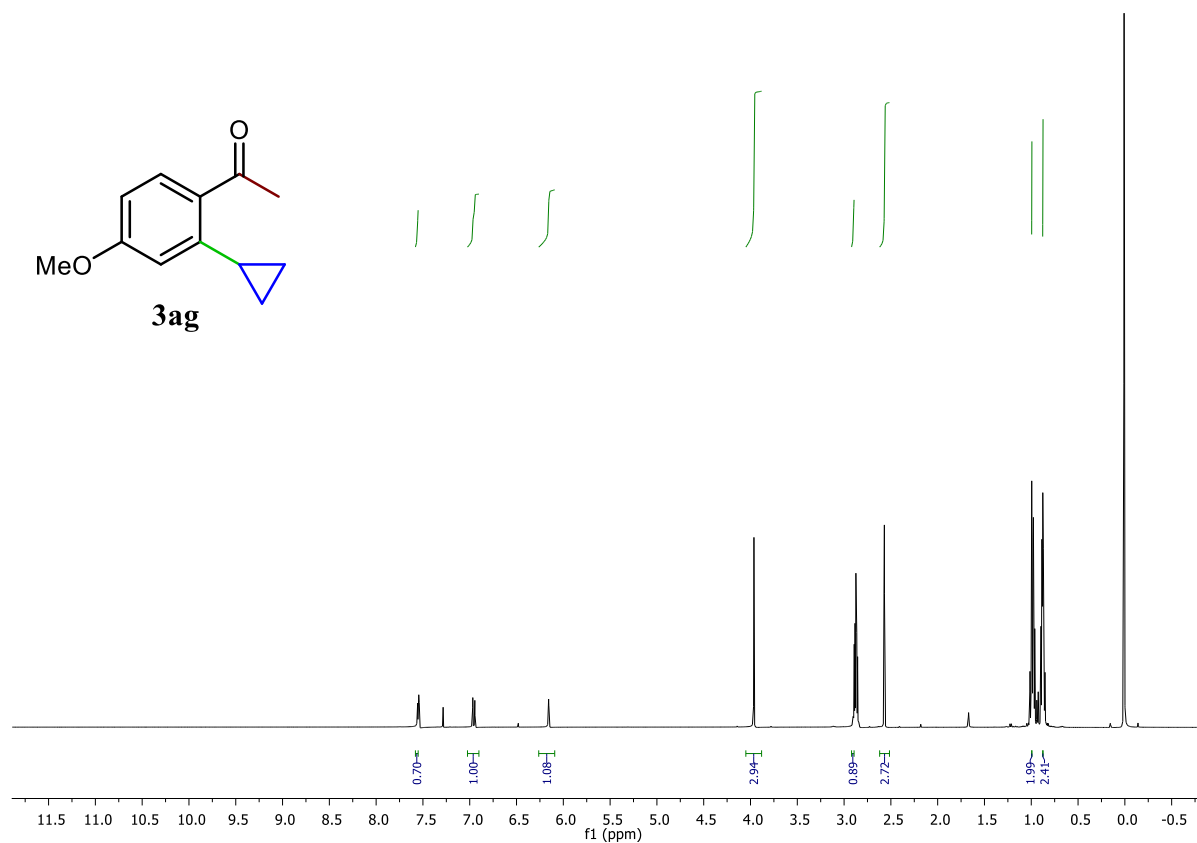

**$^{13}\text{C}$  NMR of 3ag (101 MHz, 512 scans, RT,  $\text{CDCl}_3$ )**

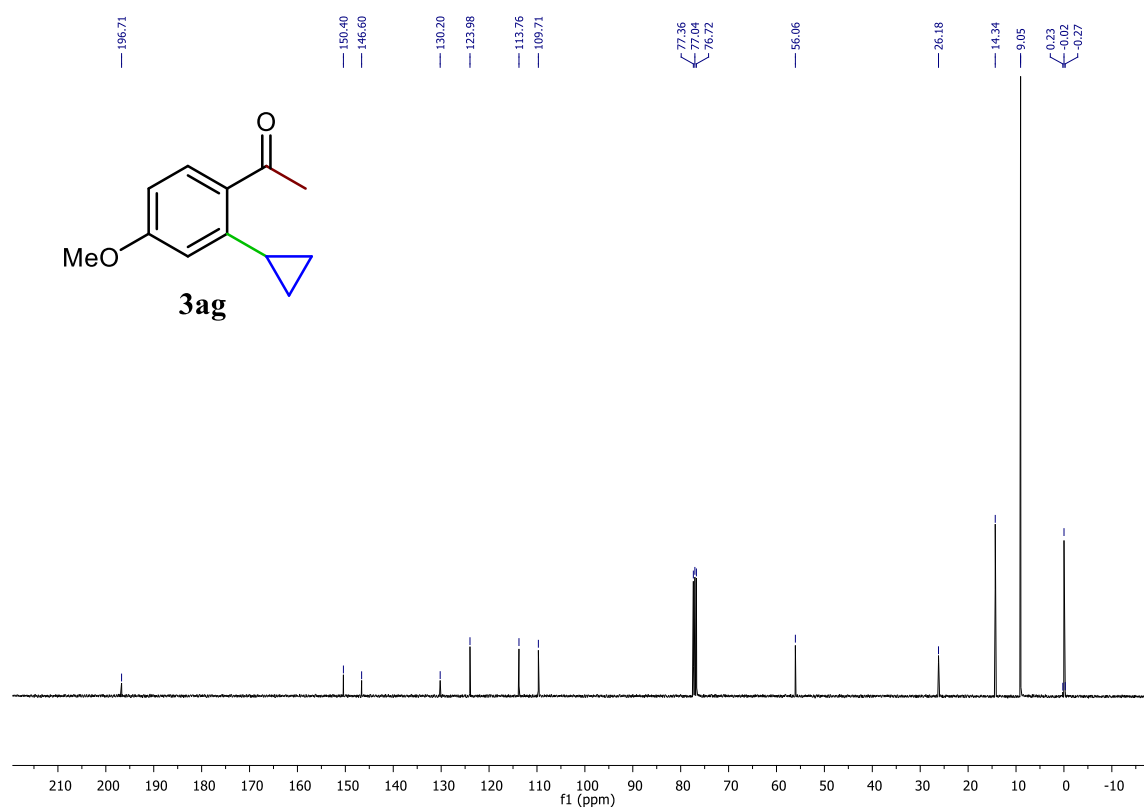

**$^1\text{H}$  NMR of 3ah (400 MHz, 32 scans, RT,  $\text{CDCl}_3$ )**

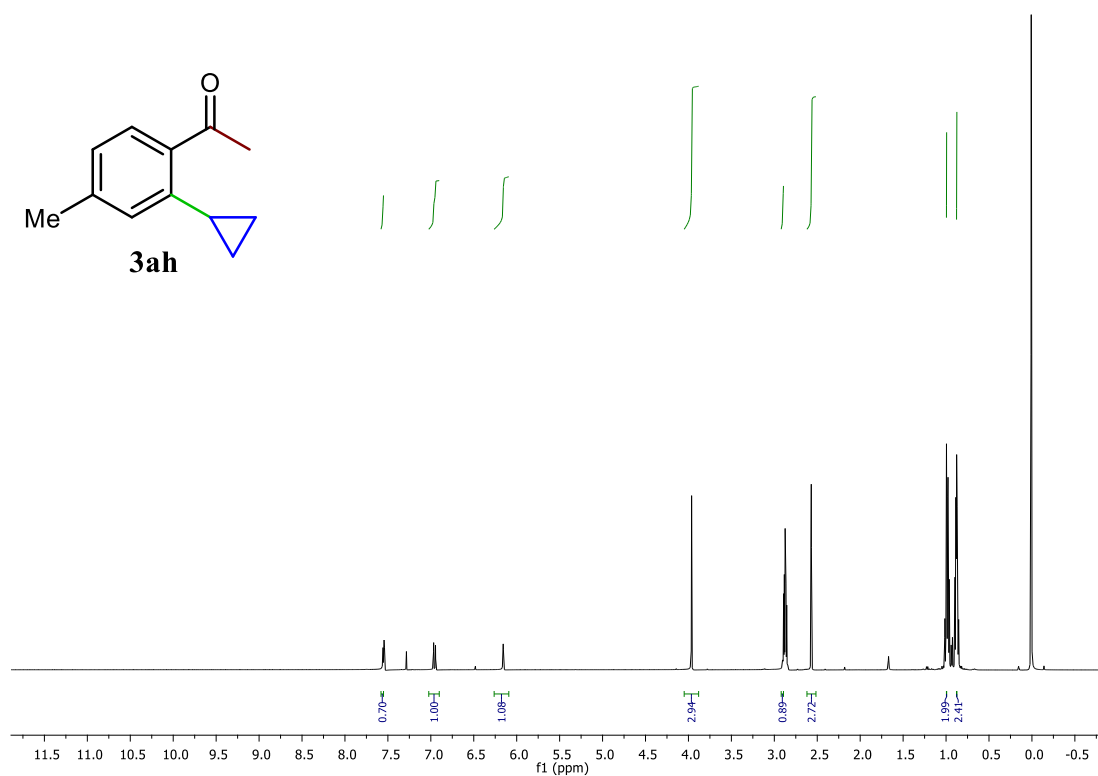

**$^{13}\text{C}$  NMR of 3ah (101 MHz, 512 scans, RT,  $\text{CDCl}_3$ )**

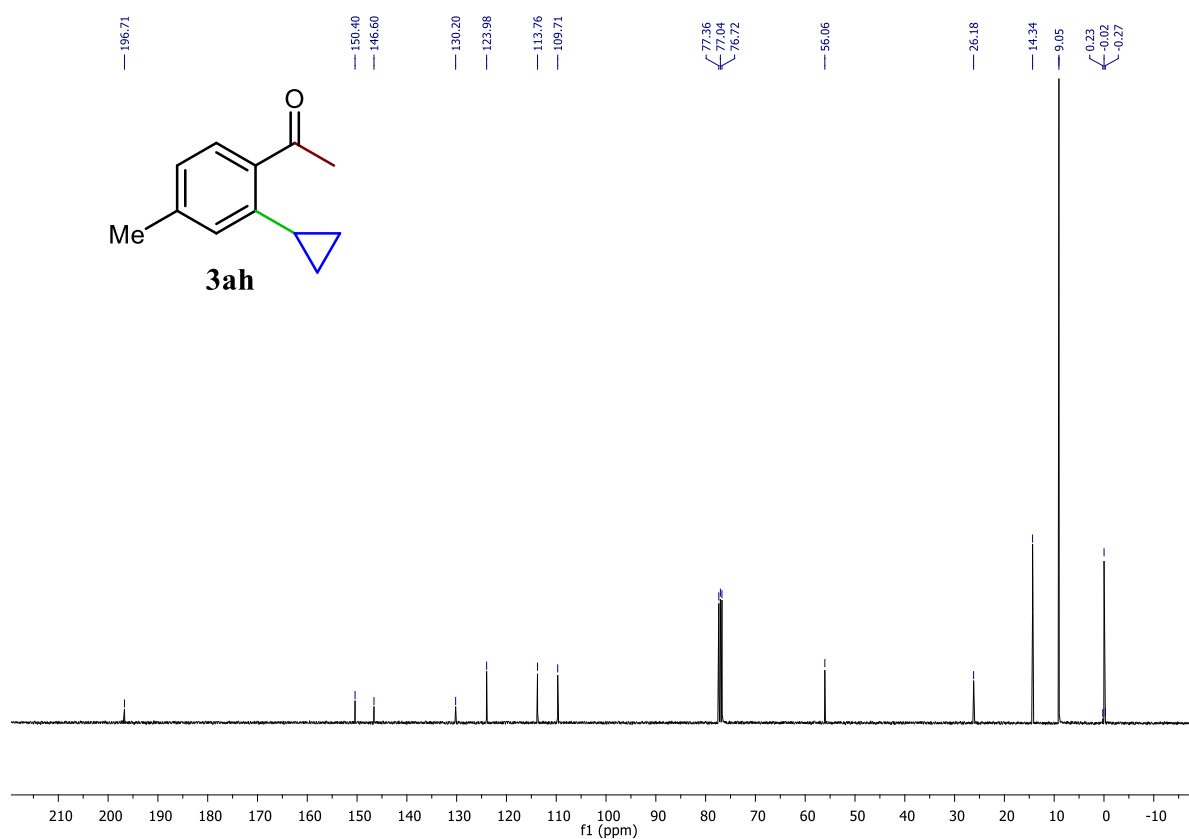

**<sup>1</sup>H NMR of 3ai (400 MHz, 32 scans, RT, CDCl<sub>3</sub>)**

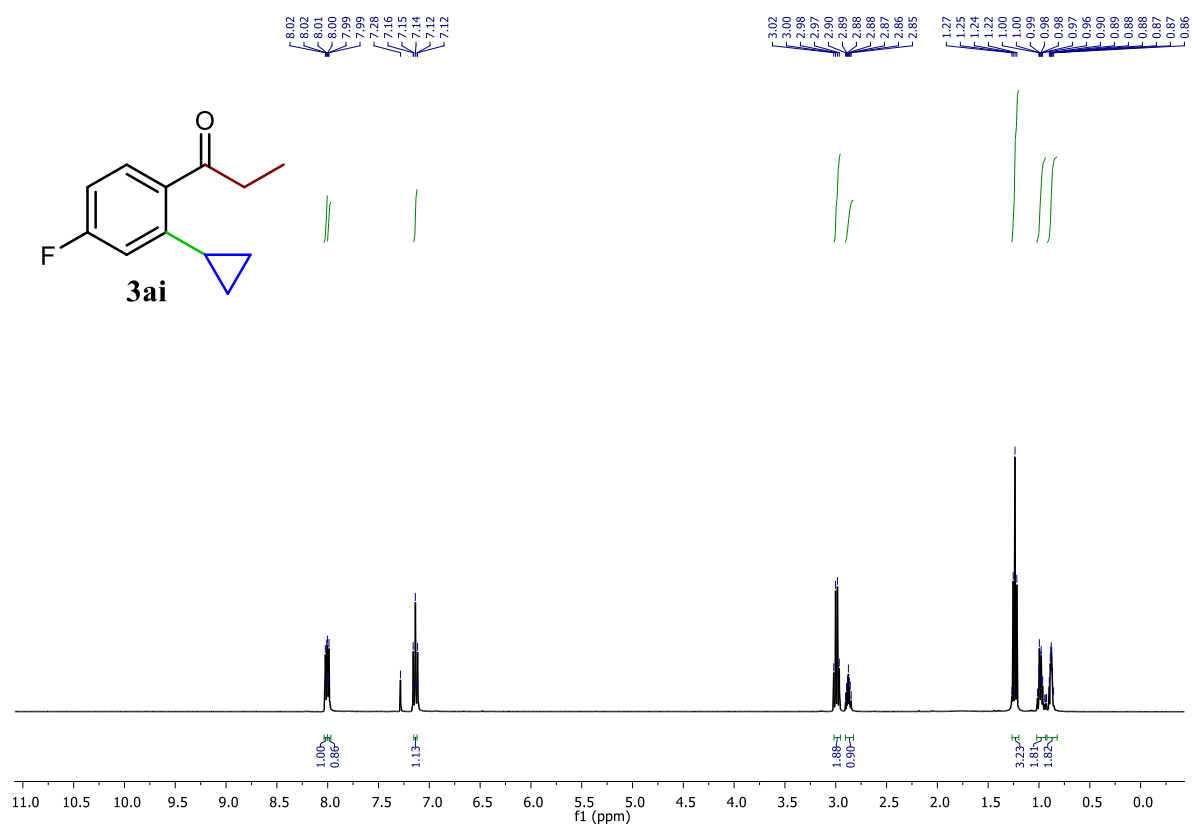

**<sup>13</sup>C NMR of 3ai (101 MHz, 512 scans, RT, CDCl<sub>3</sub>)**

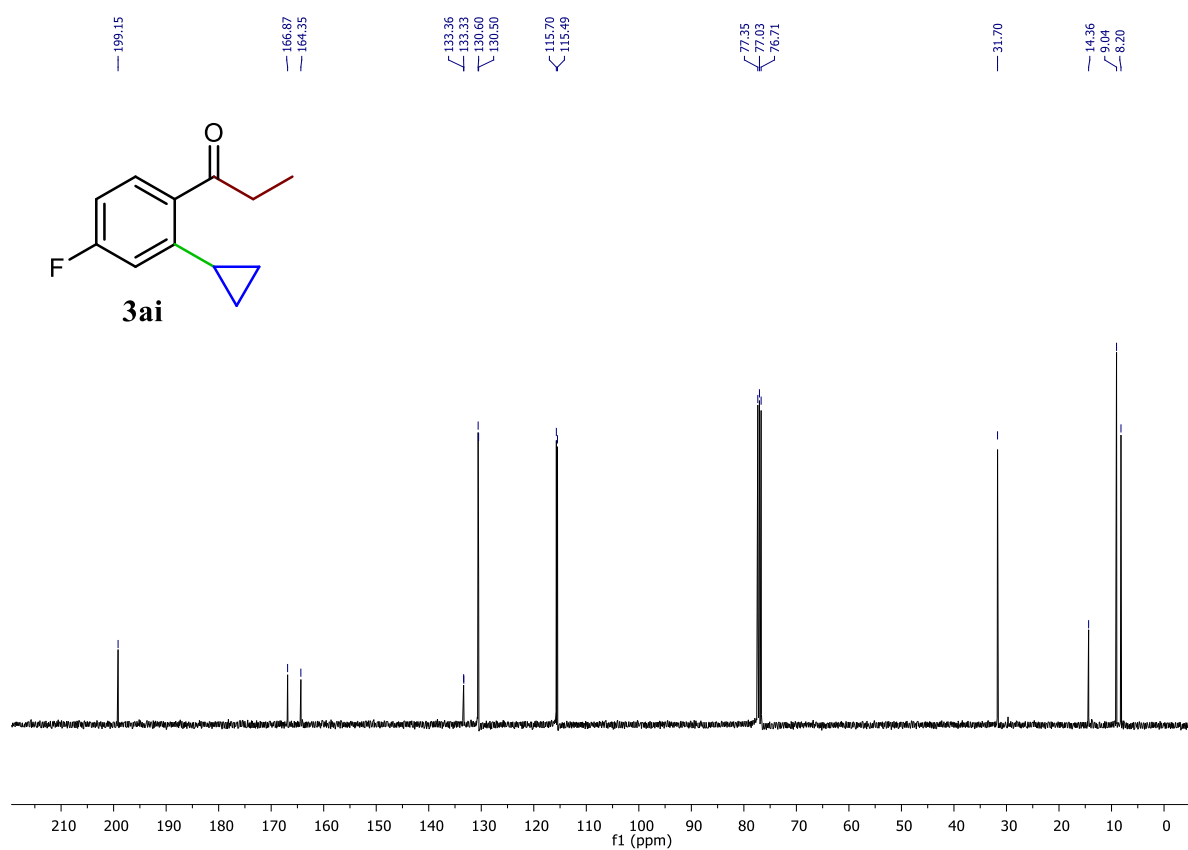

$^{19}\text{F}$  NMR of **3ai** (377 MHz,  $\text{CDCl}_3$ )

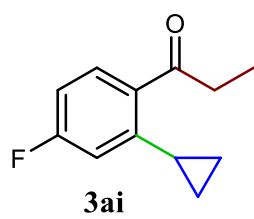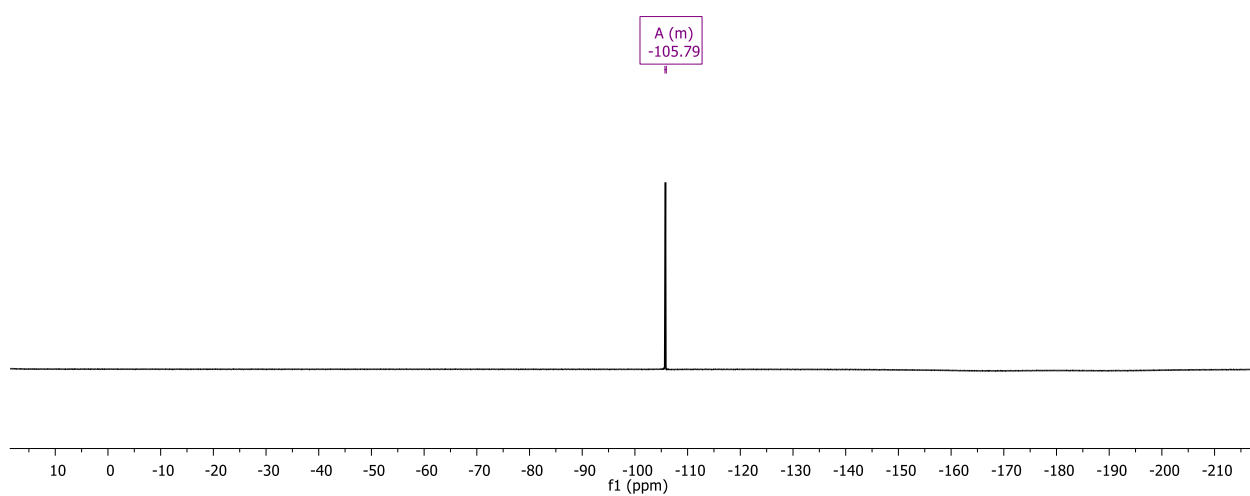

**<sup>1</sup>H NMR of 3aj (400 MHz, 32 scans, RT, CDCl<sub>3</sub>)**

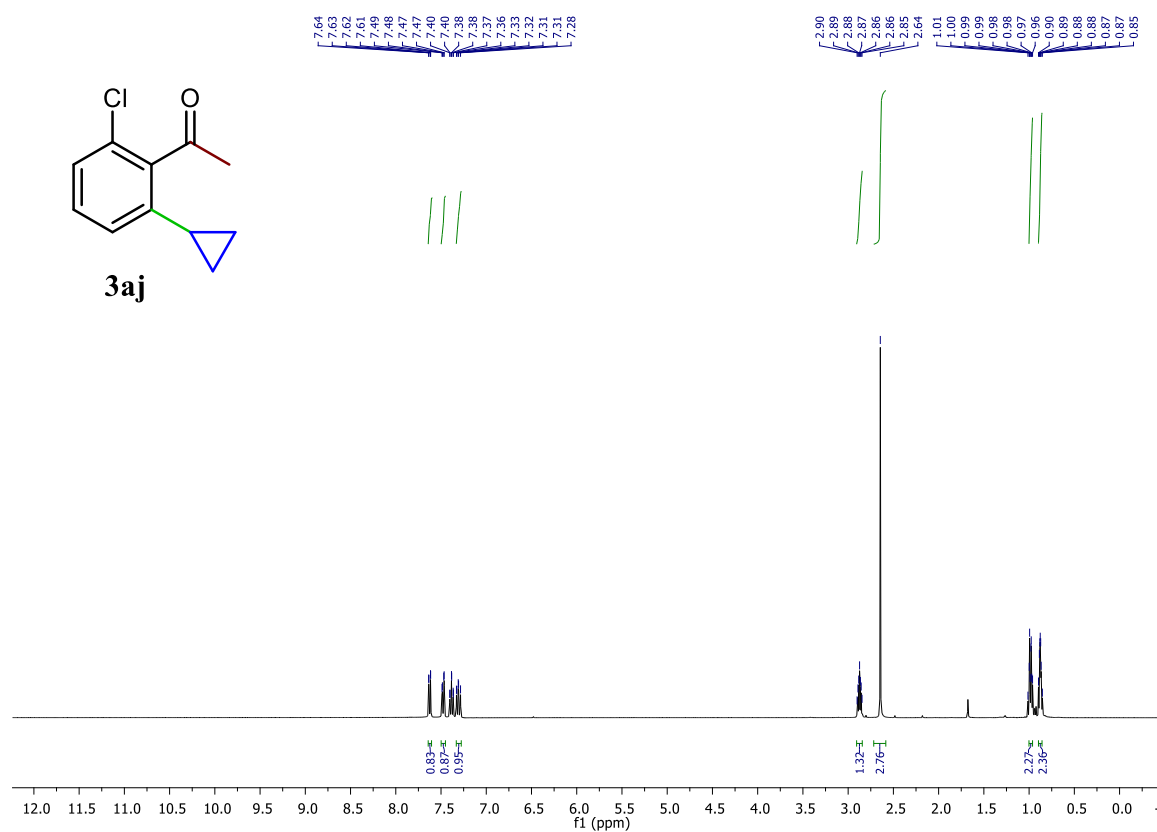

**<sup>13</sup>C NMR of 3aj (101 MHz, 512 scans, RT, CDCl<sub>3</sub>)**

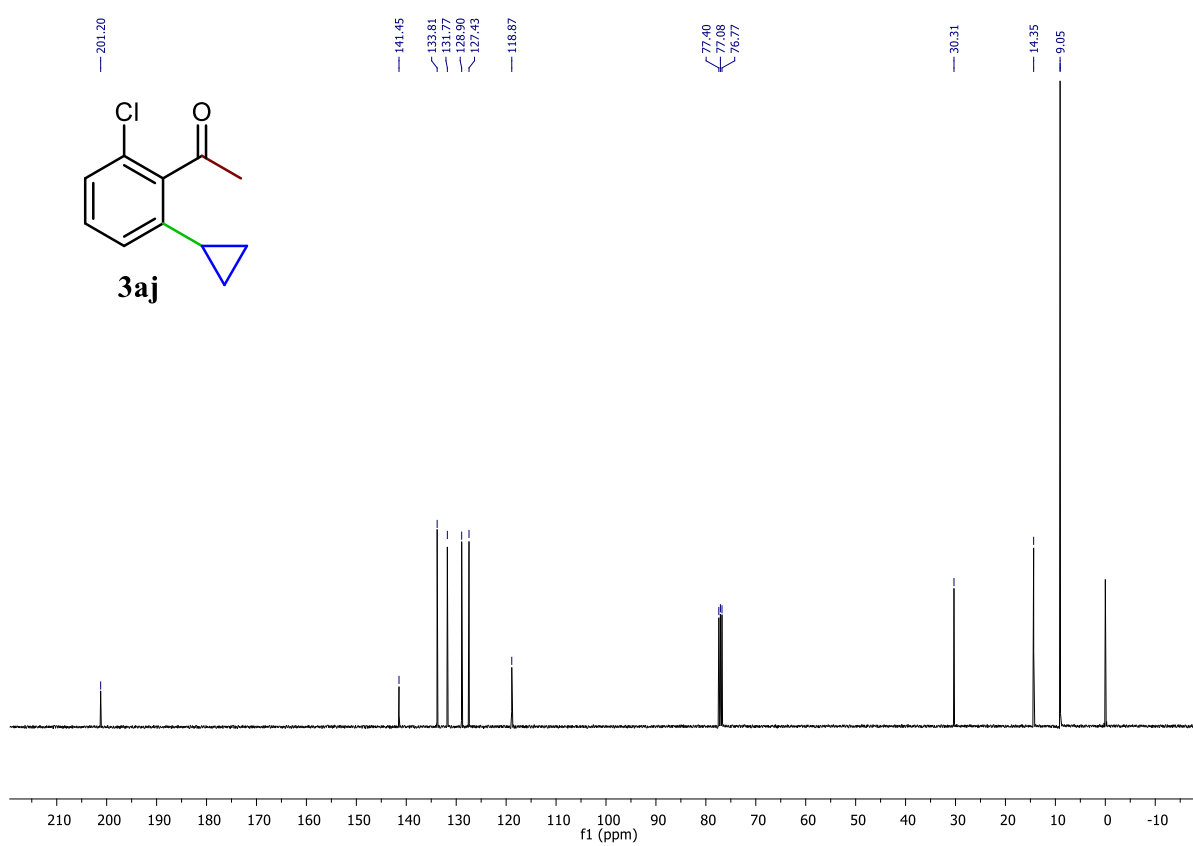

**$^1\text{H}$  NMR of 3ak (400 MHz, 32 scans, RT,  $\text{CDCl}_3$ )**

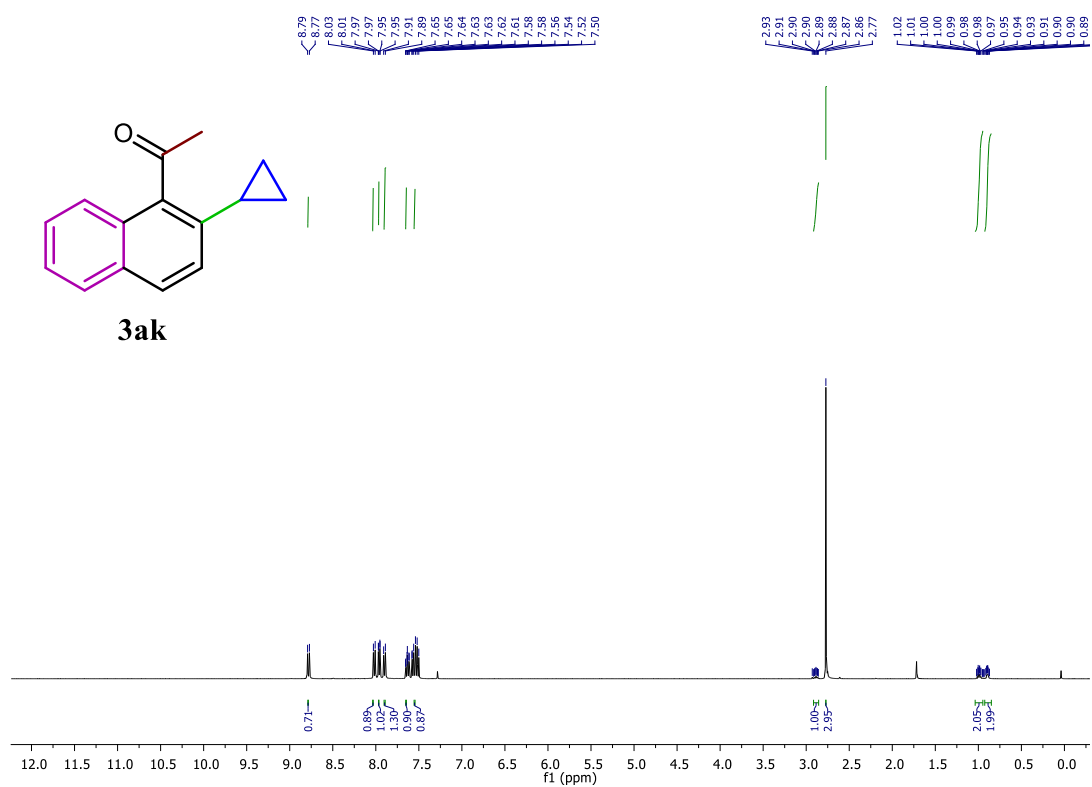

**$^{13}\text{C}$  NMR of 3ak (101 MHz, 512 scans, RT,  $\text{CDCl}_3$ )**

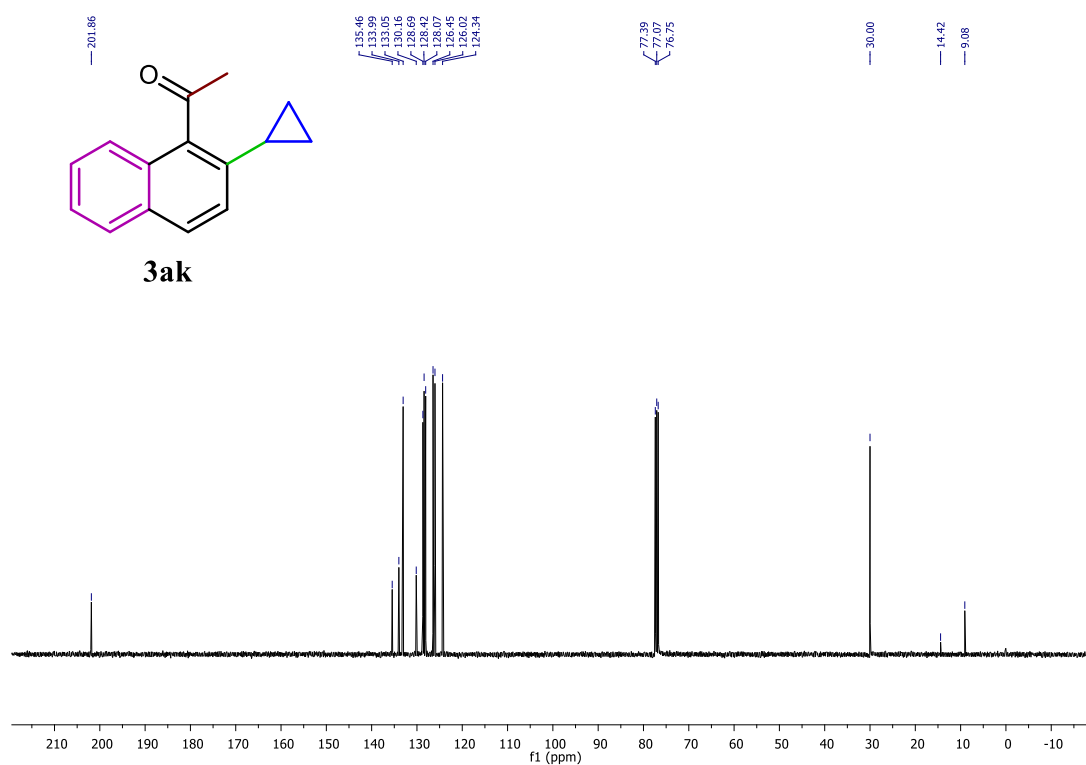

**$^1\text{H}$  NMR of 3al (400 MHz, 32 scans, RT,  $\text{CDCl}_3$ )**

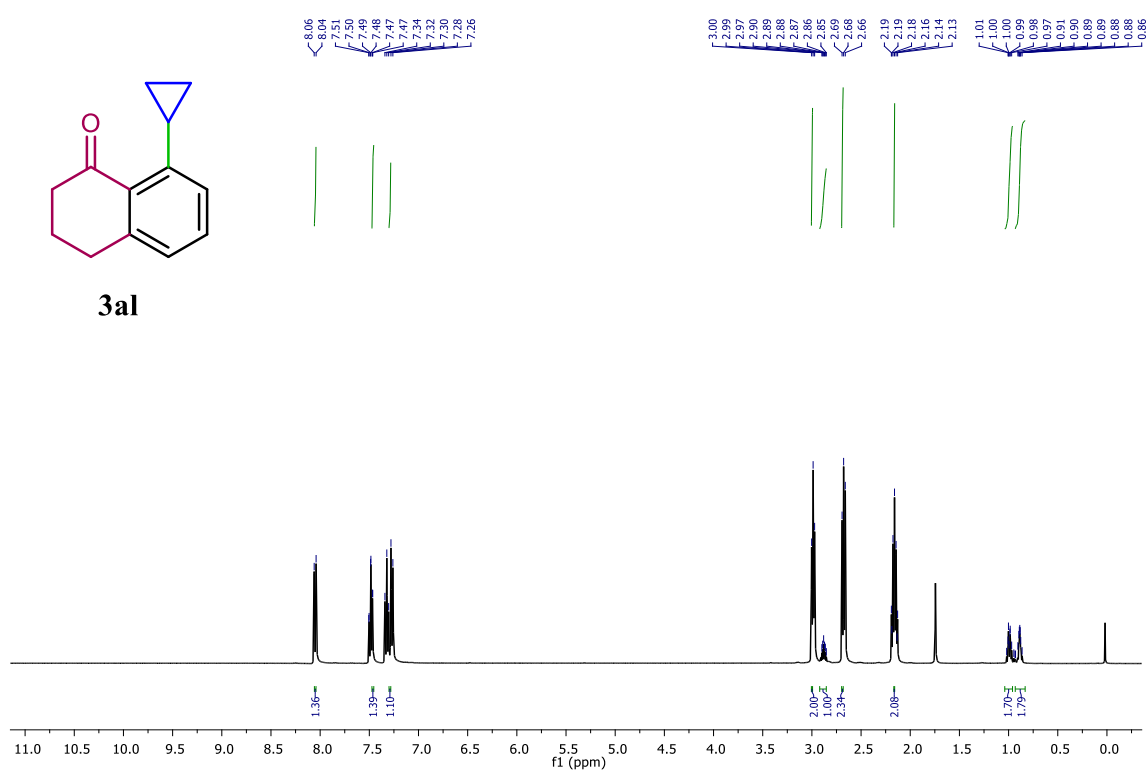

**$^{13}\text{C}$  NMR of 3al (101 MHz, 512 scans, RT,  $\text{CDCl}_3$ )**

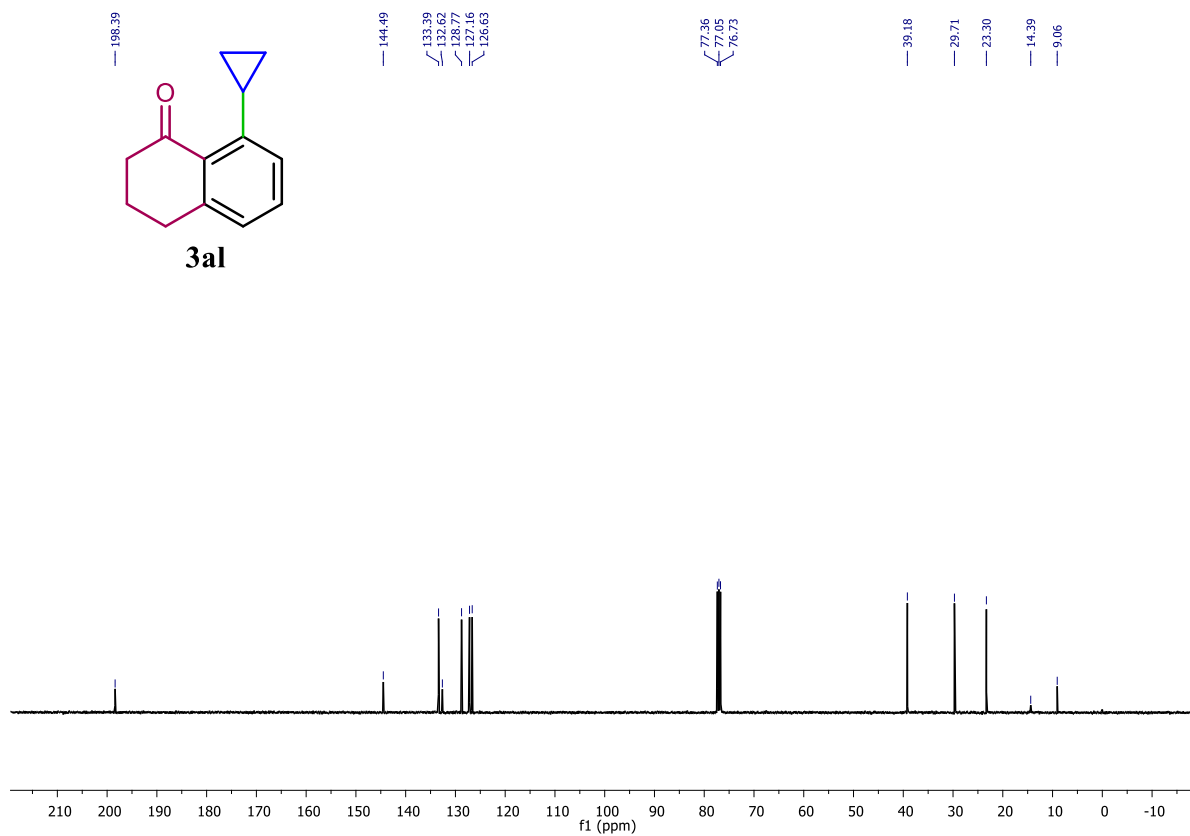



**$^1\text{H}$  NMR of 3am (400 MHz, 32 scans, RT,  $\text{CDCl}_3$ )**

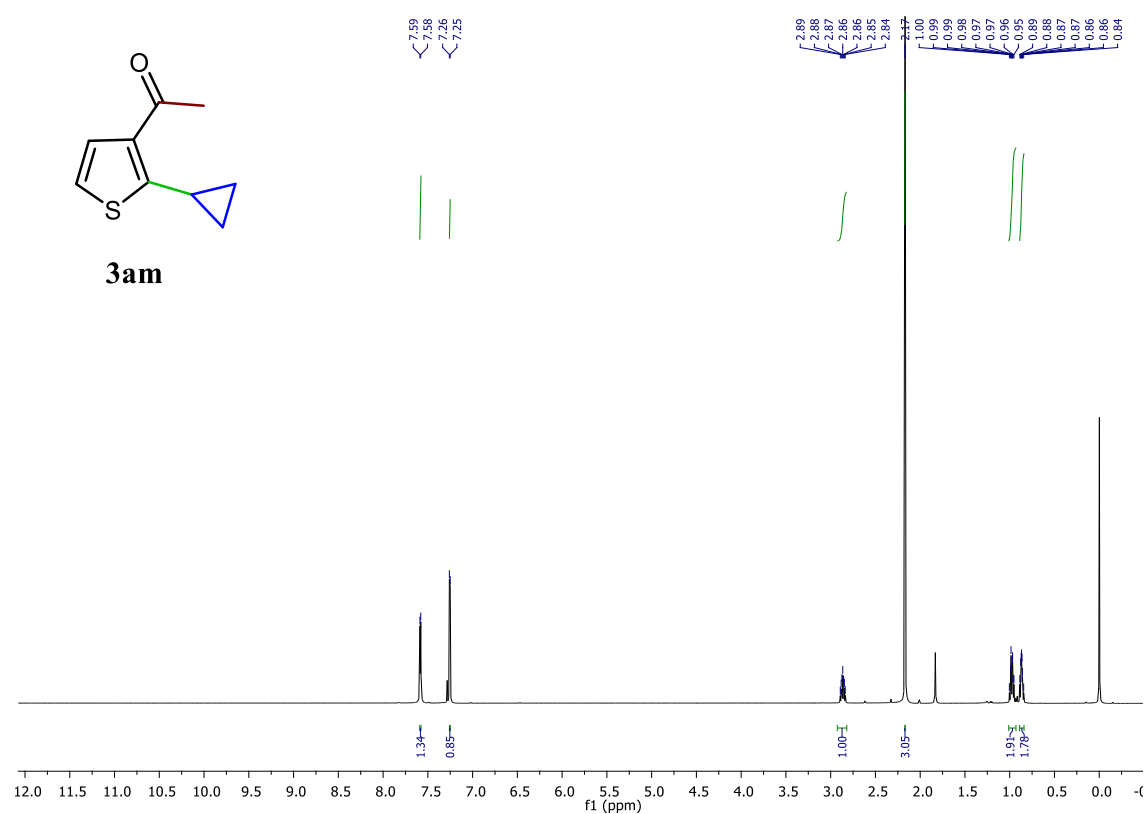

**$^{13}\text{C}$  NMR of 3am (101 MHz, 512 scans, RT,  $\text{CDCl}_3$ )**

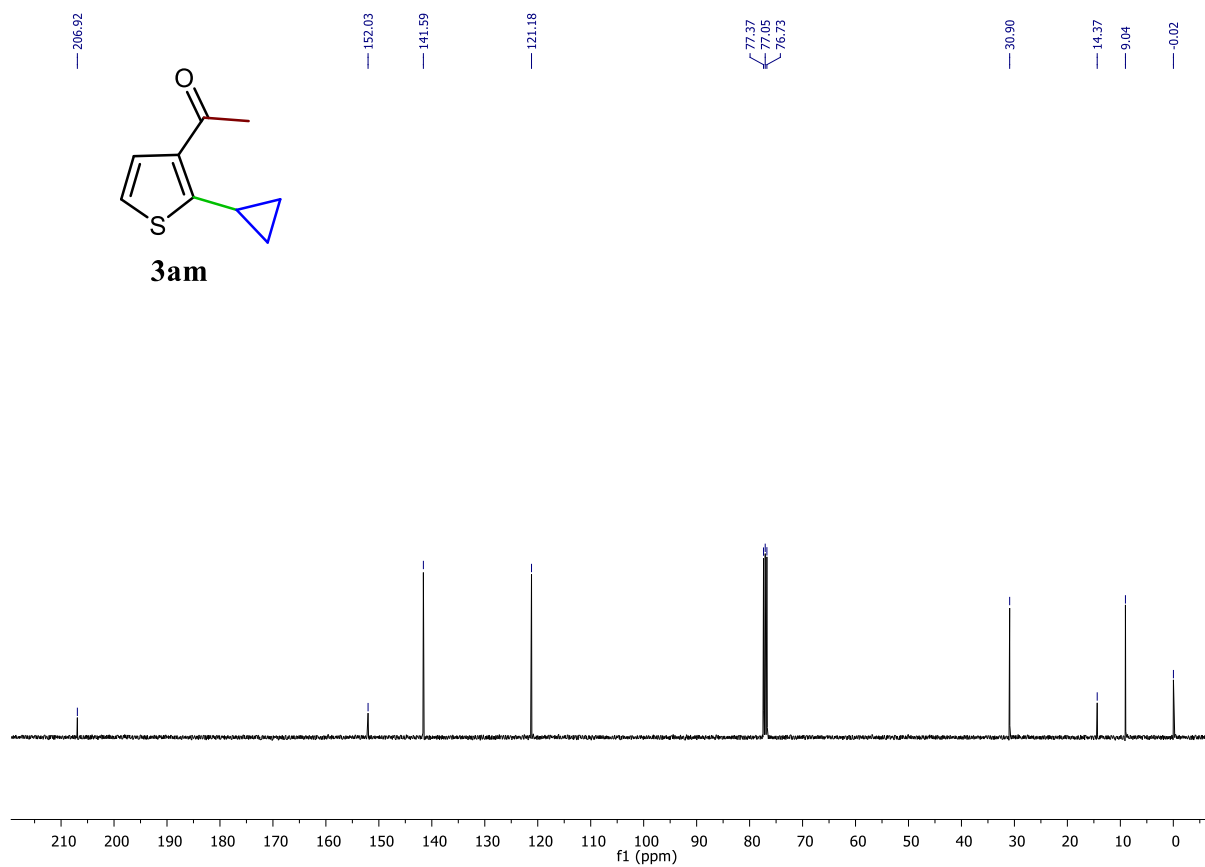

**$^1\text{H}$  NMR of 3an (400 MHz, 32 scans, RT,  $\text{CDCl}_3$ )**

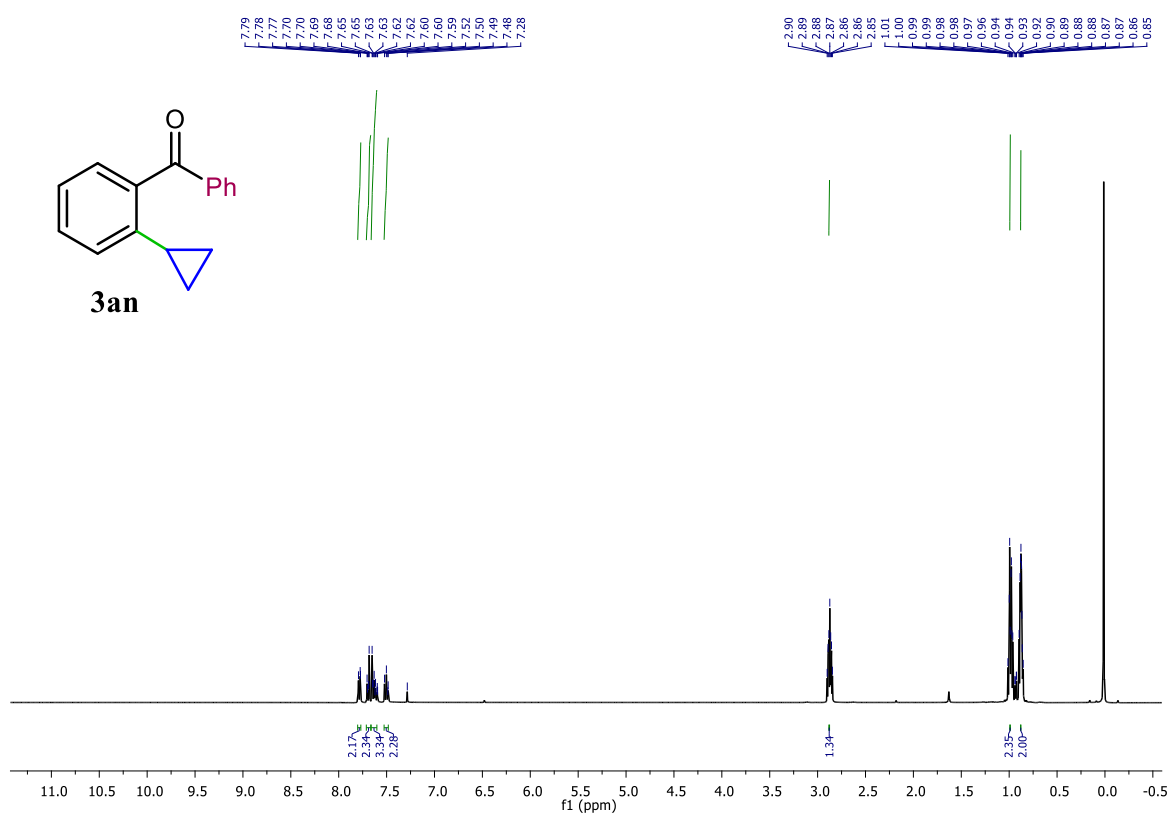

**$^{13}\text{C}$  NMR of 3an (101 MHz, 512 scans, RT,  $\text{CDCl}_3$ )**

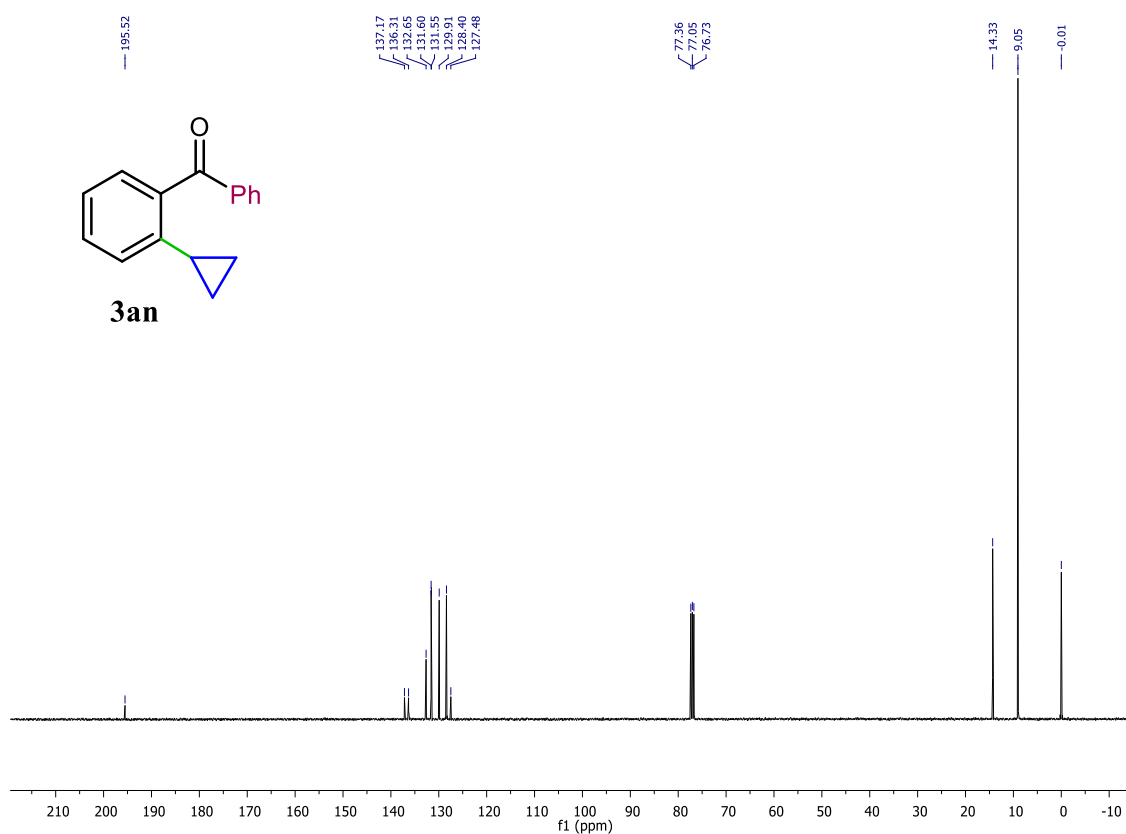

**$^1\text{H}$  NMR of 3ao (400 MHz, 32 scans, RT, DMSO- $d_6$ )**

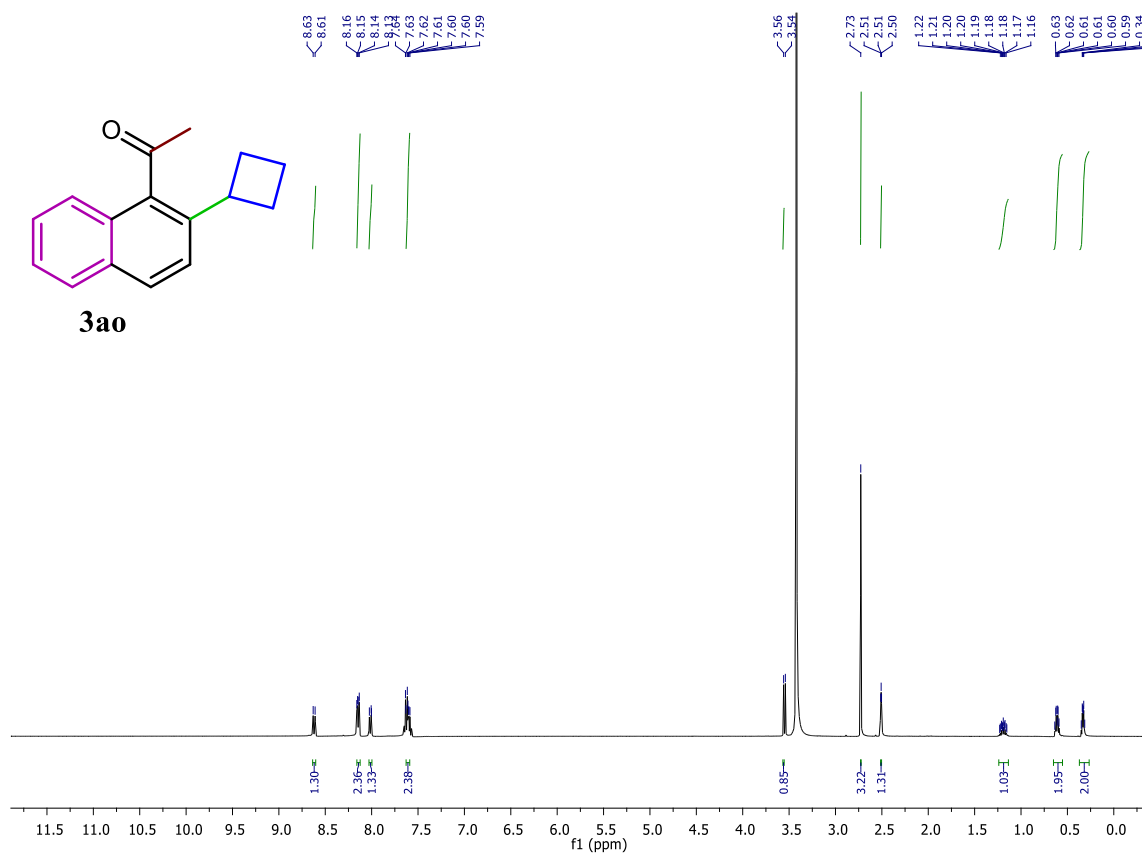

**$^{13}\text{C}$  NMR of 3ao (101 MHz, 512 scans, RT, DMSO- $d_6$ )**

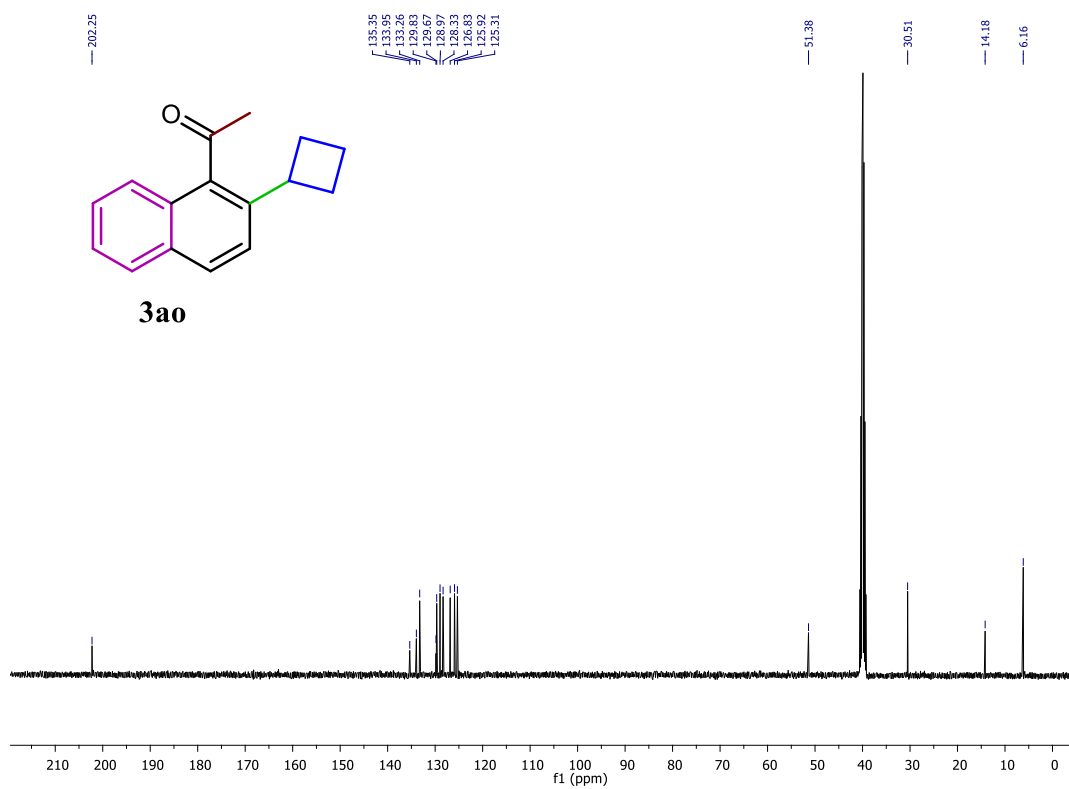

**$^1\text{H}$  NMR of 3ap (400 MHz, 32 scans, RT,  $\text{CDCl}_3$ )**

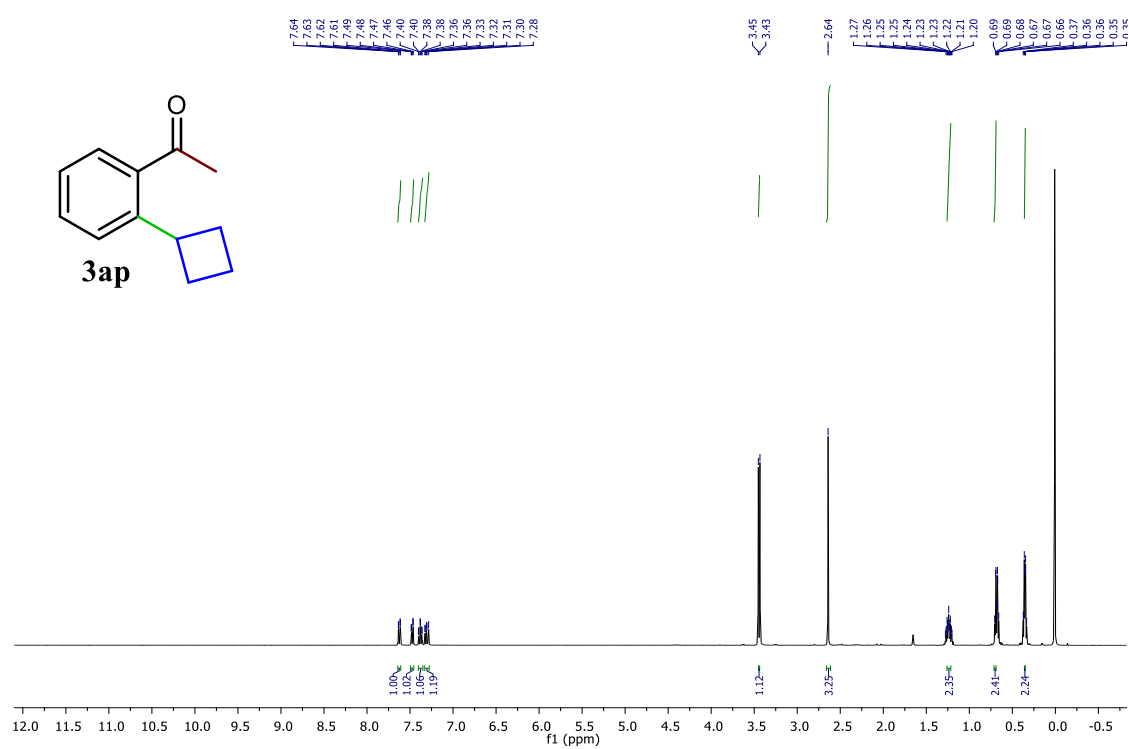

**$^{13}\text{C}$  NMR of 3ap (101 MHz, 512 scans, RT,  $\text{CDCl}_3$ )**

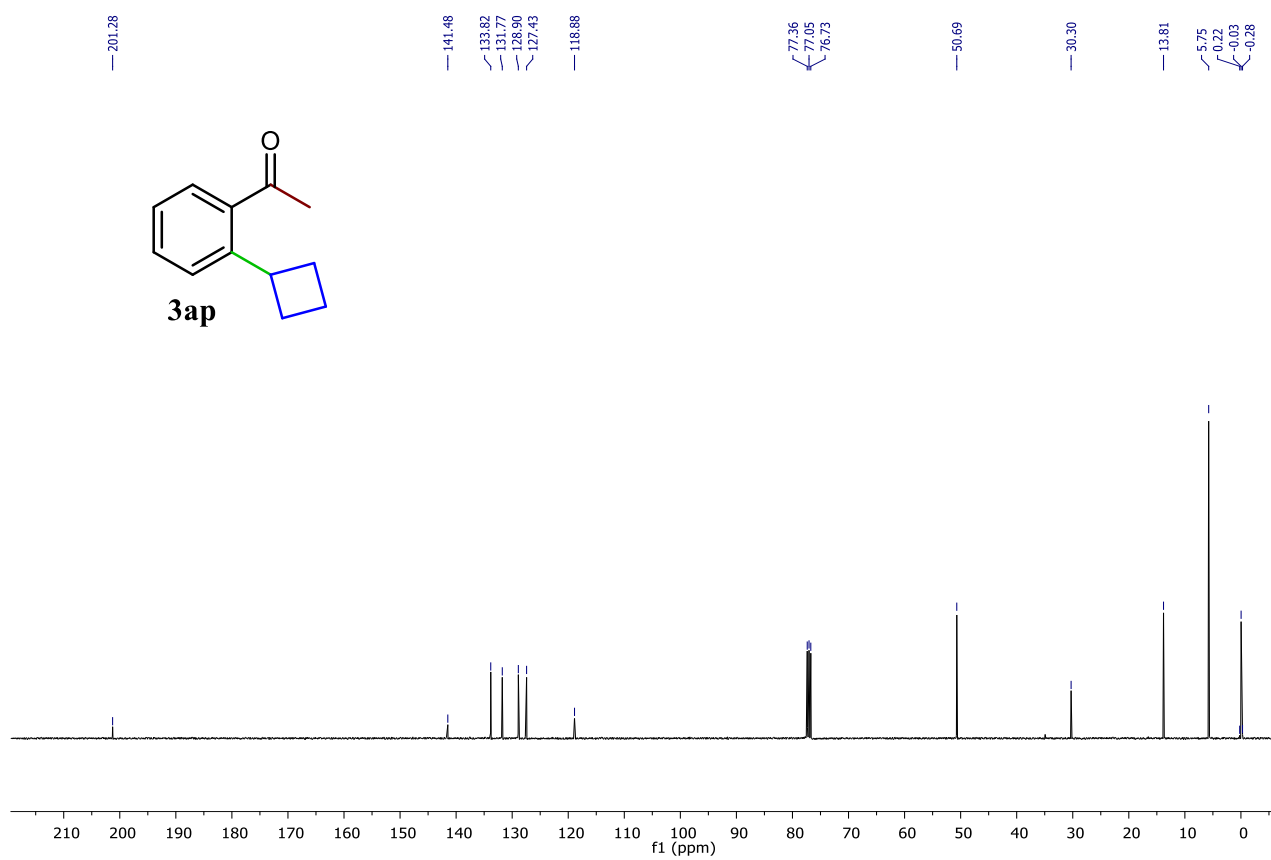

**$^1\text{H}$  NMR of 3aq (400 MHz, 32 scans, RT,  $\text{CDCl}_3$ )**

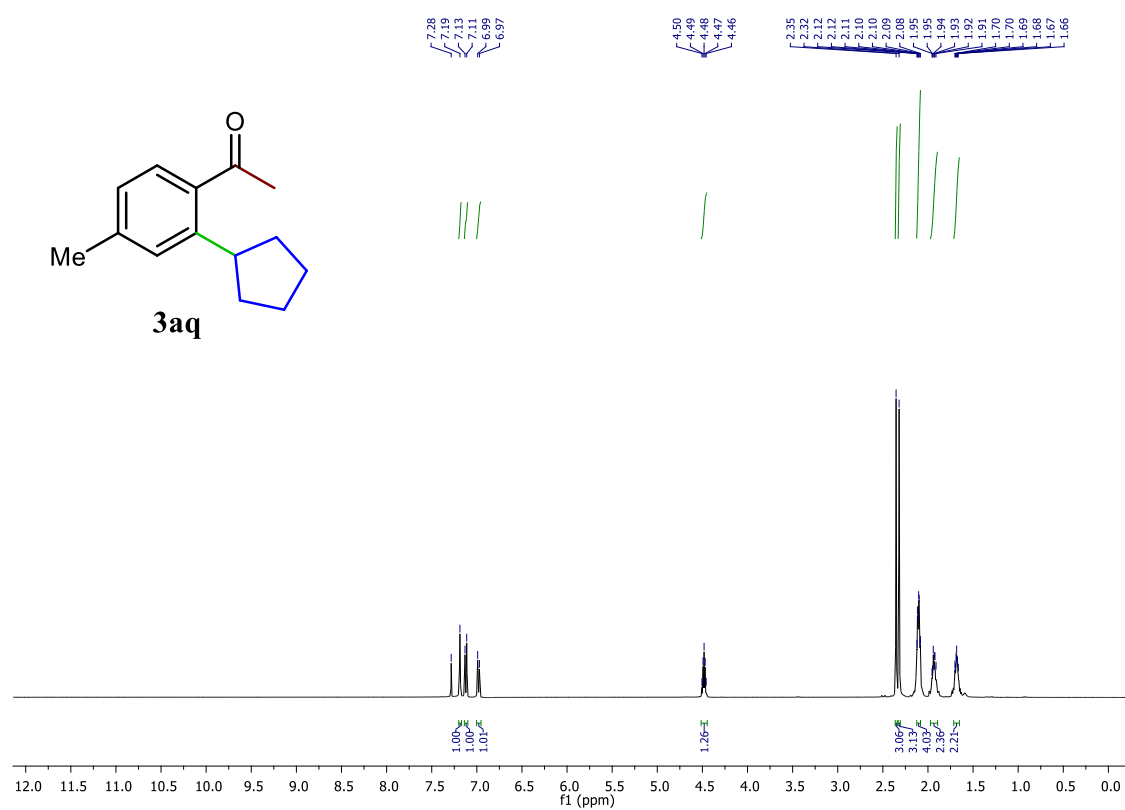

**$^{13}\text{C}$  NMR of 3aq (101 MHz, 512 scans, RT,  $\text{CDCl}_3$ )**

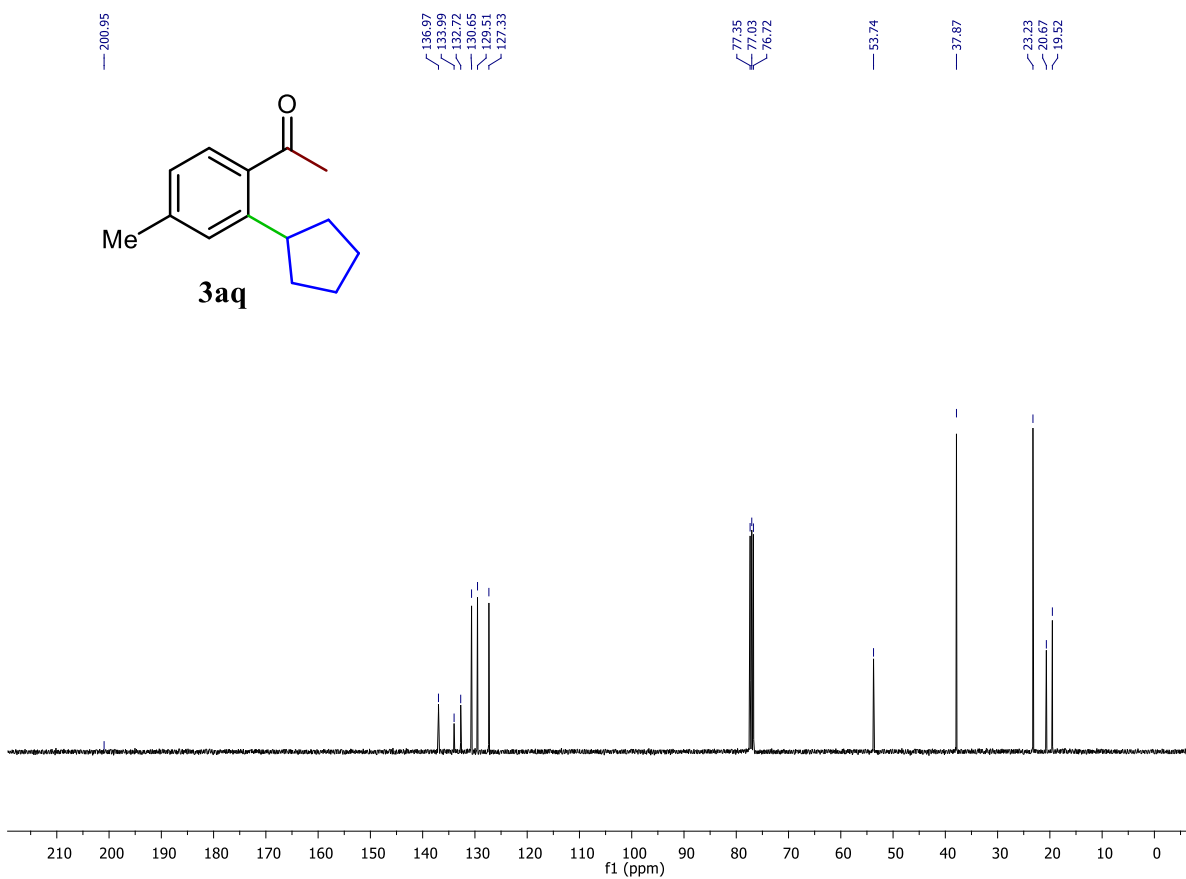

**$^1\text{H}$  NMR of 3ar (400 MHz, 32 scans, RT,  $\text{CDCl}_3$ )**

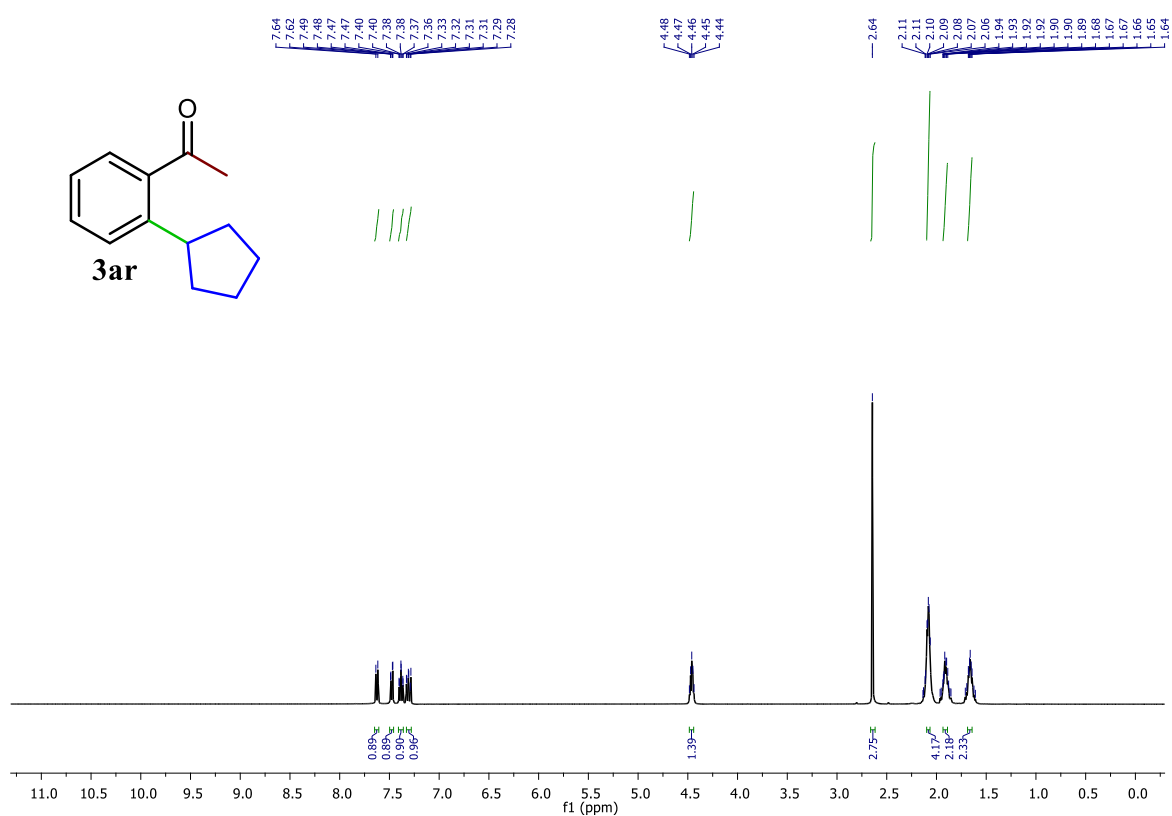

**$^{13}\text{C}$  NMR of 3ar (101 MHz, 512 scans, RT,  $\text{CDCl}_3$ )**

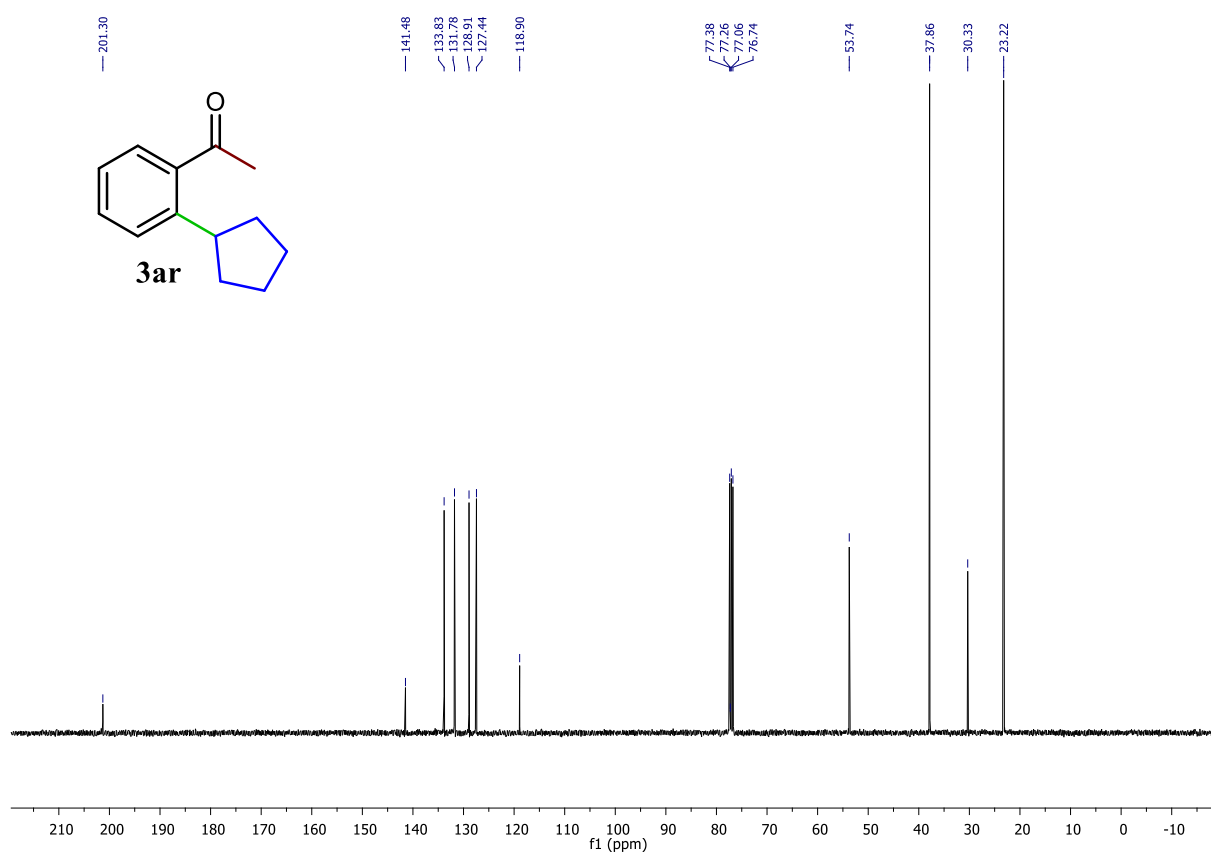

**$^1\text{H}$  NMR of 3as (400 MHz, 32 scans, RT, DMSO- $d_6$ )**

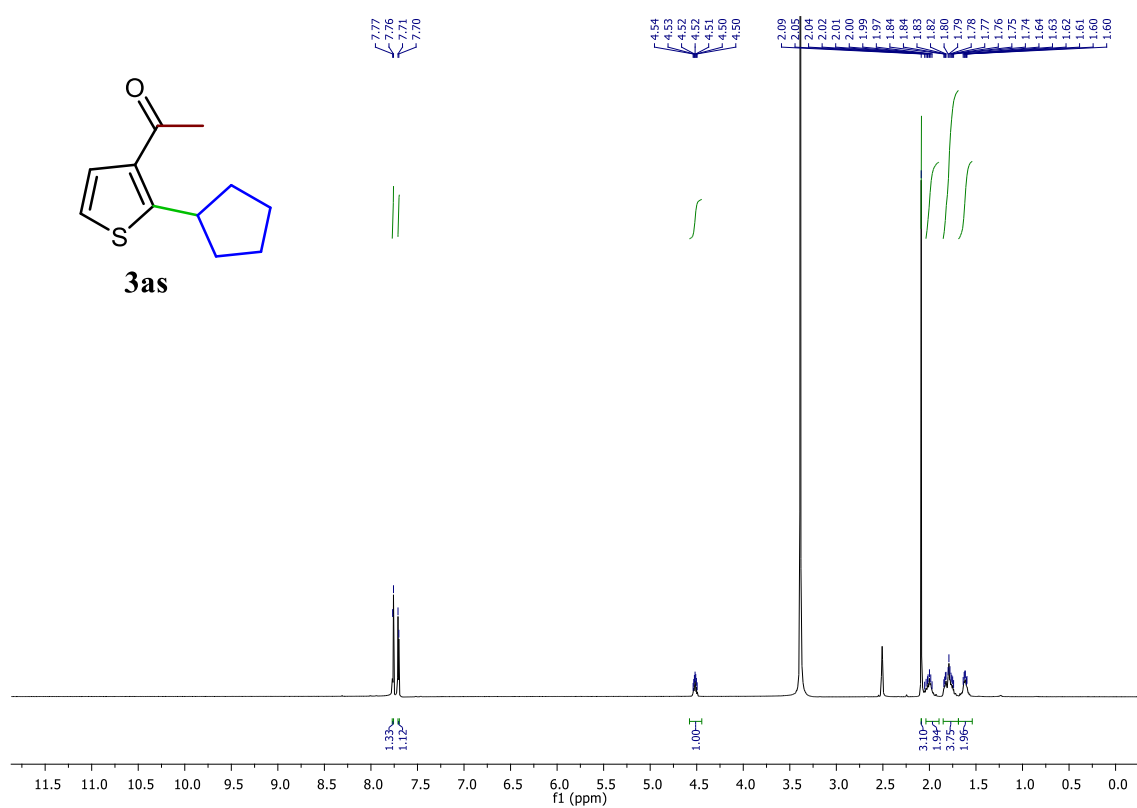

**$^{13}\text{C}$  NMR of 3as (101 MHz, 512 scans, RT, DMSO- $d_6$ )**

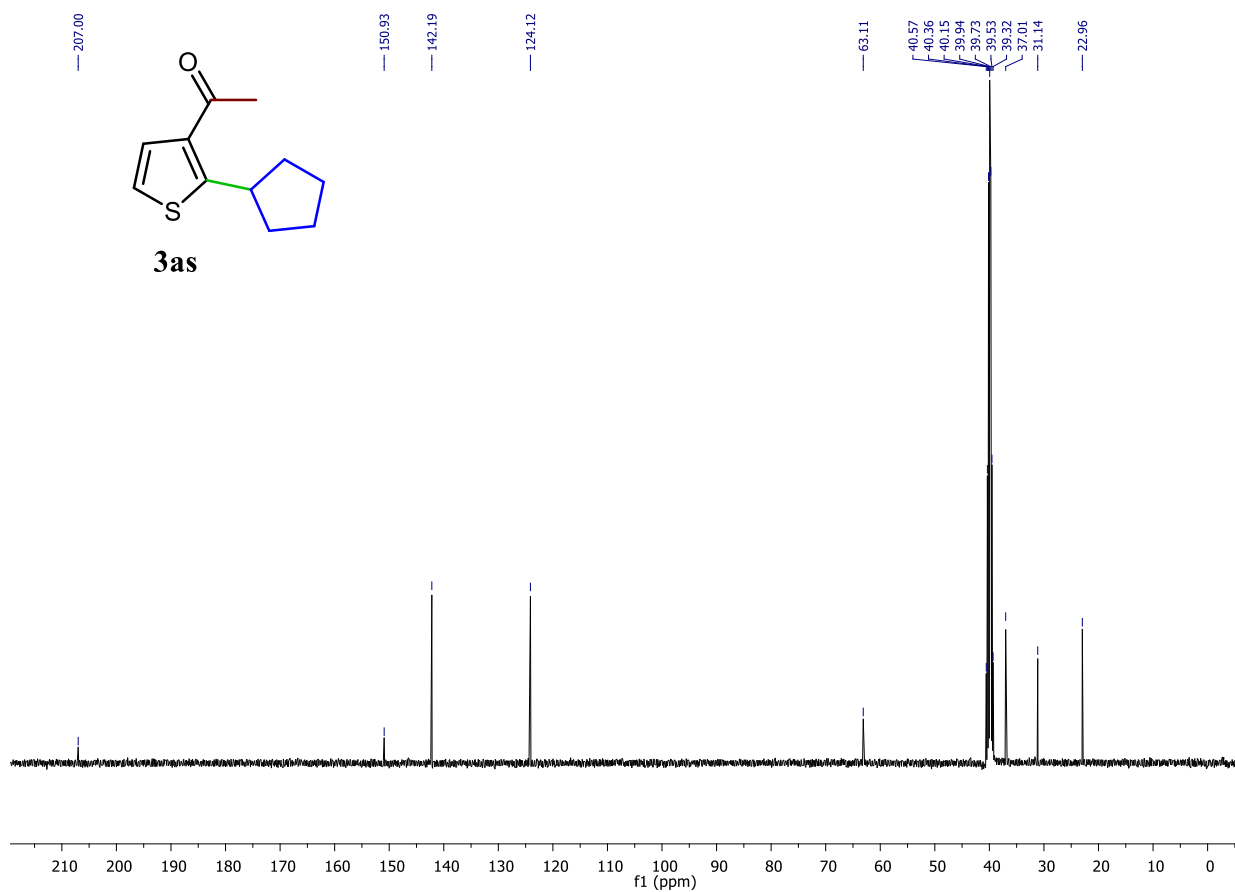

**$^1\text{H}$  NMR of 3at (400 MHz, 32 scans, RT,  $\text{CDCl}_3$ )**

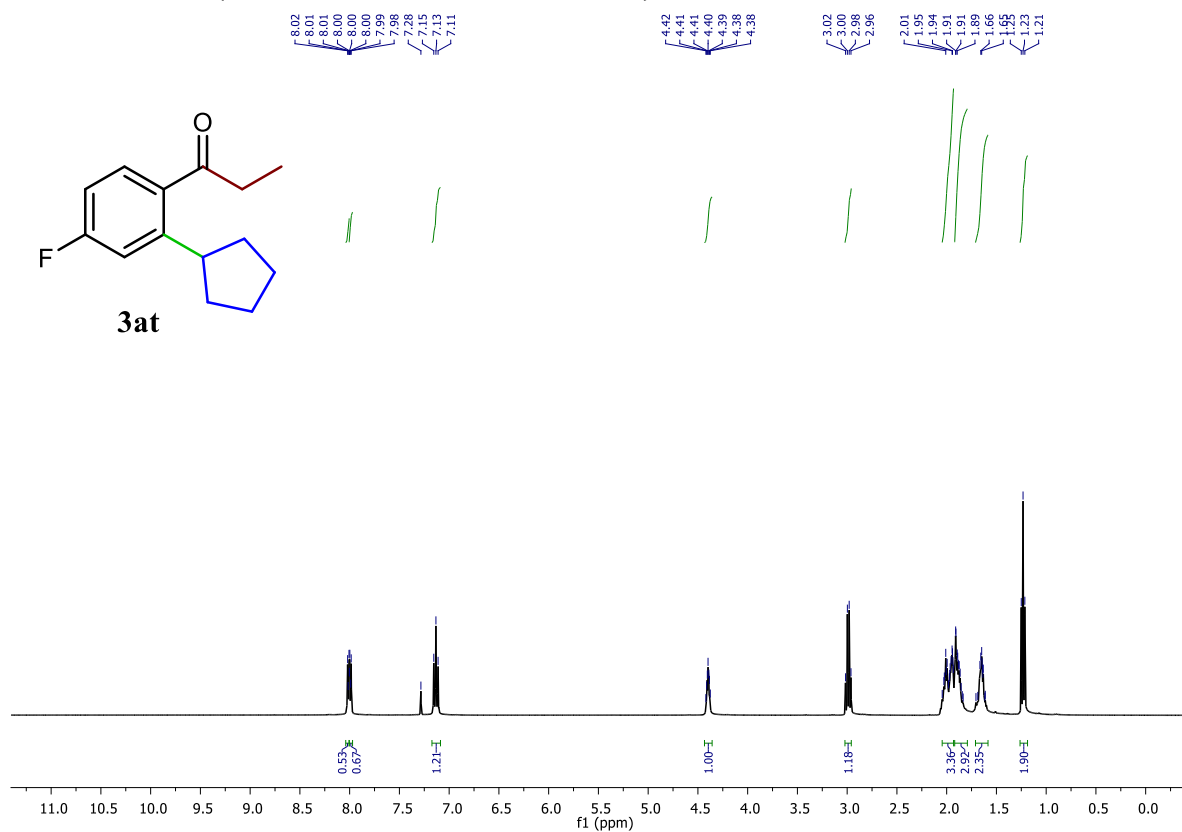

**$^{13}\text{C}$  NMR of 3at (101 MHz, 512 scans, RT,  $\text{CDCl}_3$ )**

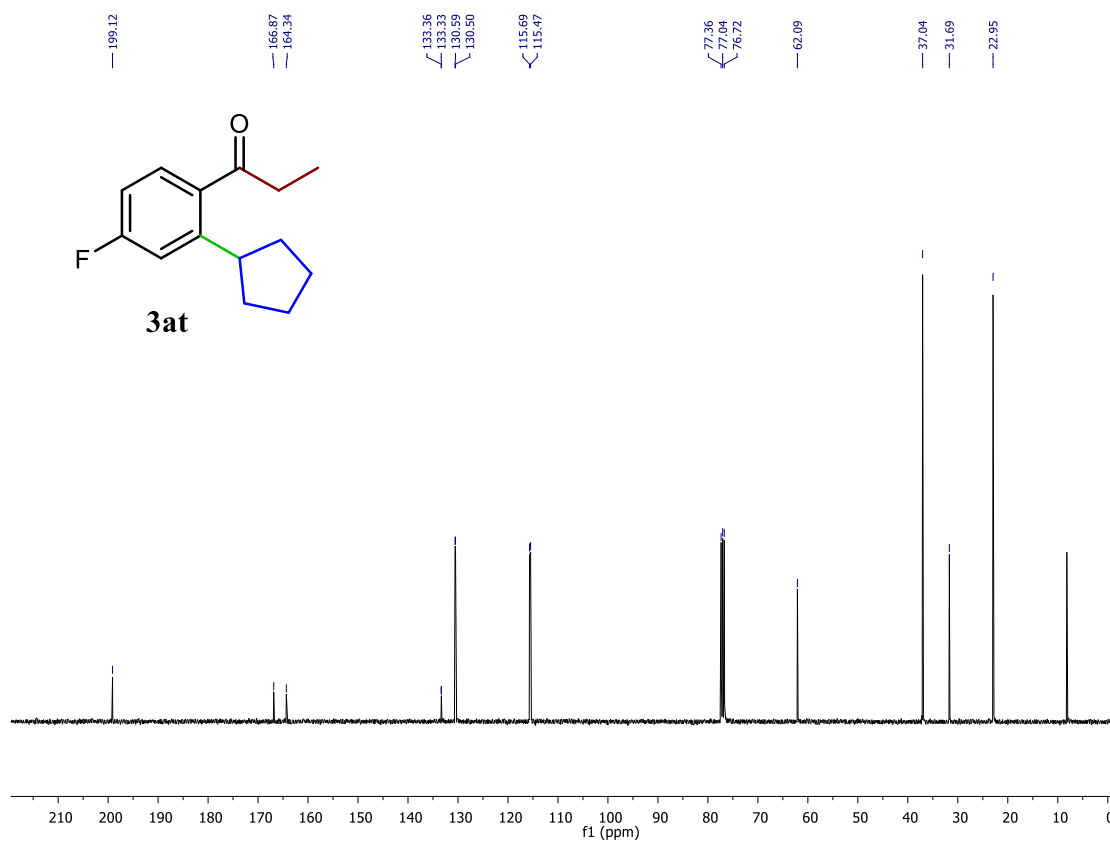



**$^1\text{H}$  NMR of 3au (400 MHz, 32 scans, RT,  $\text{CDCl}_3$ )**

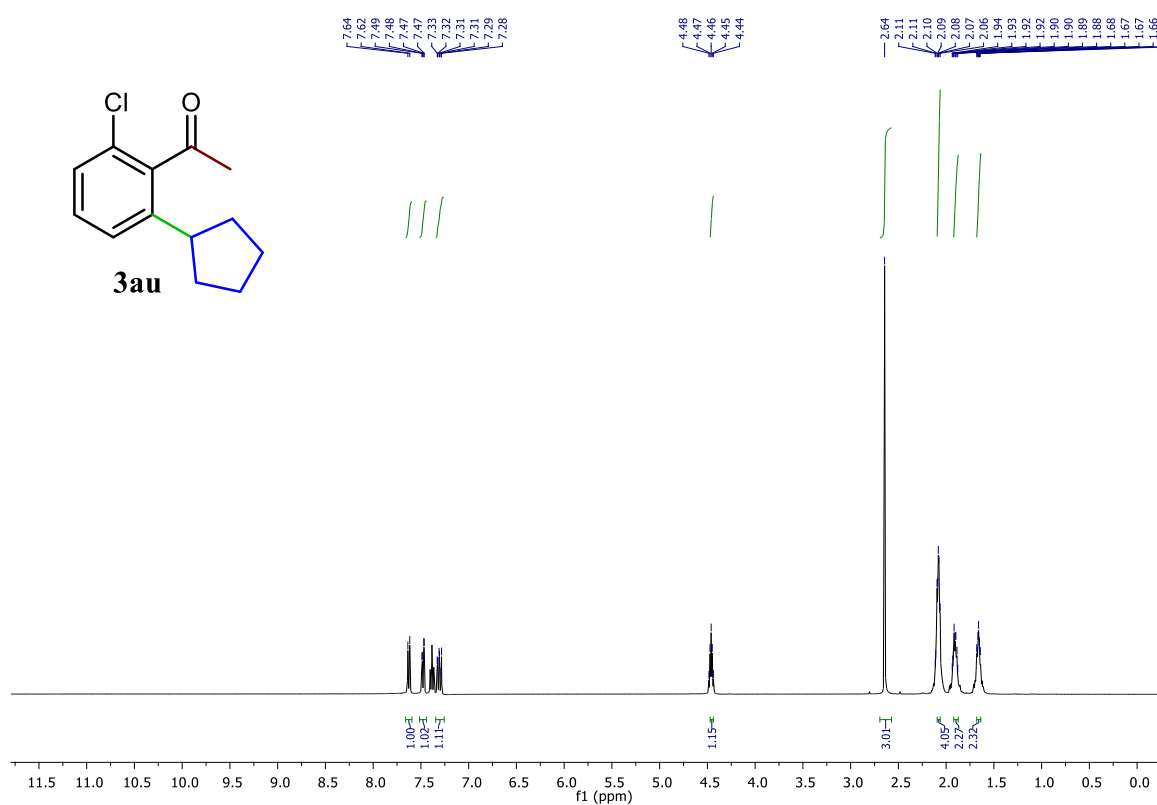

**$^{13}\text{C}$  NMR of 3au (101 MHz, 512 scans, RT,  $\text{CDCl}_3$ )**

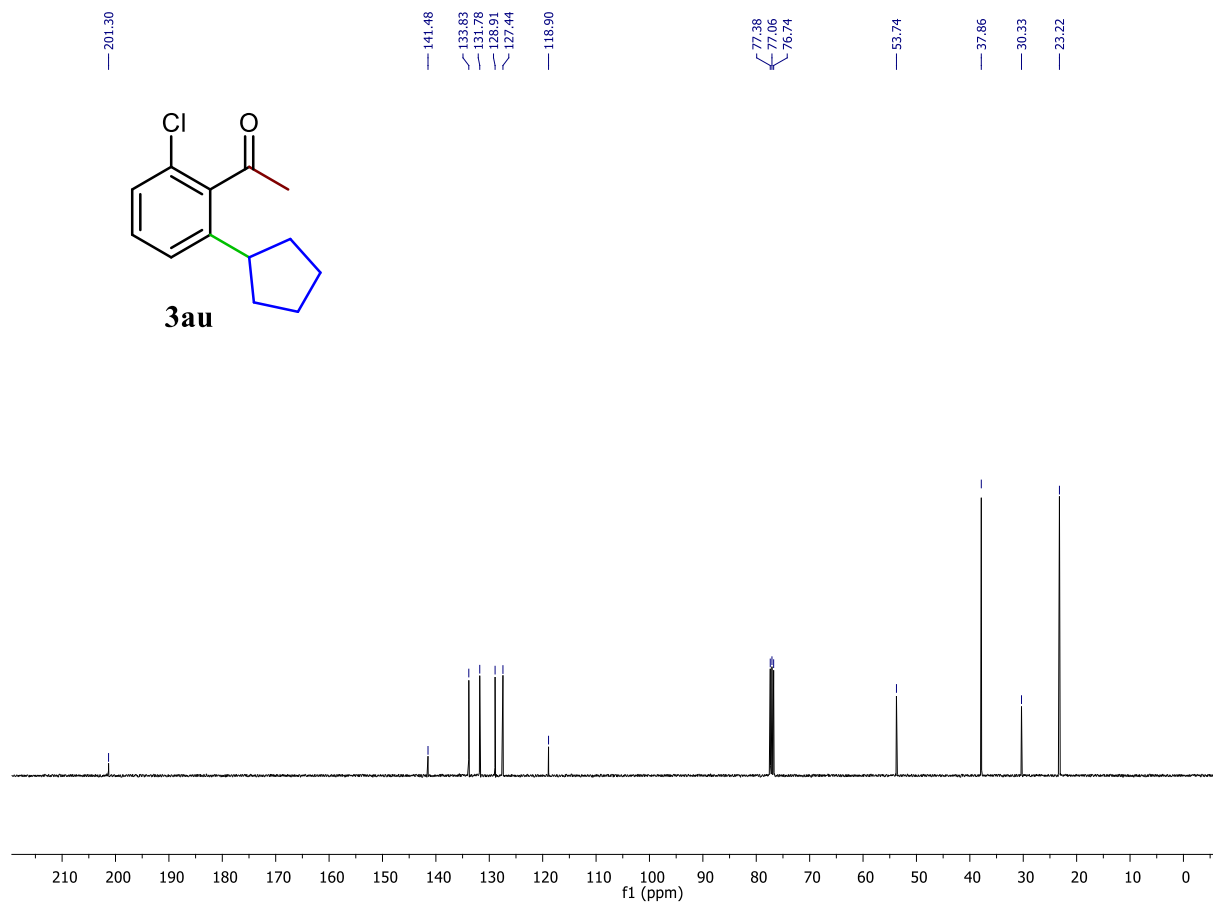

**<sup>1</sup>H NMR of 3av (400 MHz, 32 scans, RT, CDCl<sub>3</sub>)**

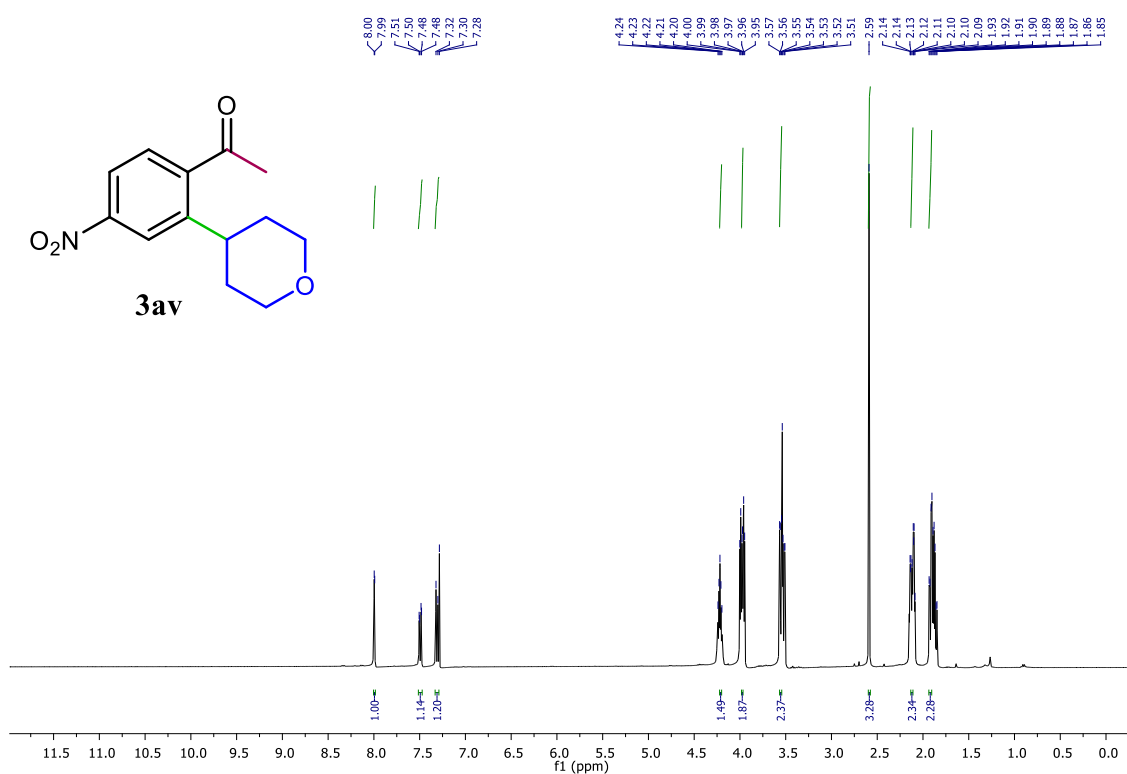

**<sup>13</sup>C NMR of 3av (101 MHz, 512 scans, RT, CDCl<sub>3</sub>)**

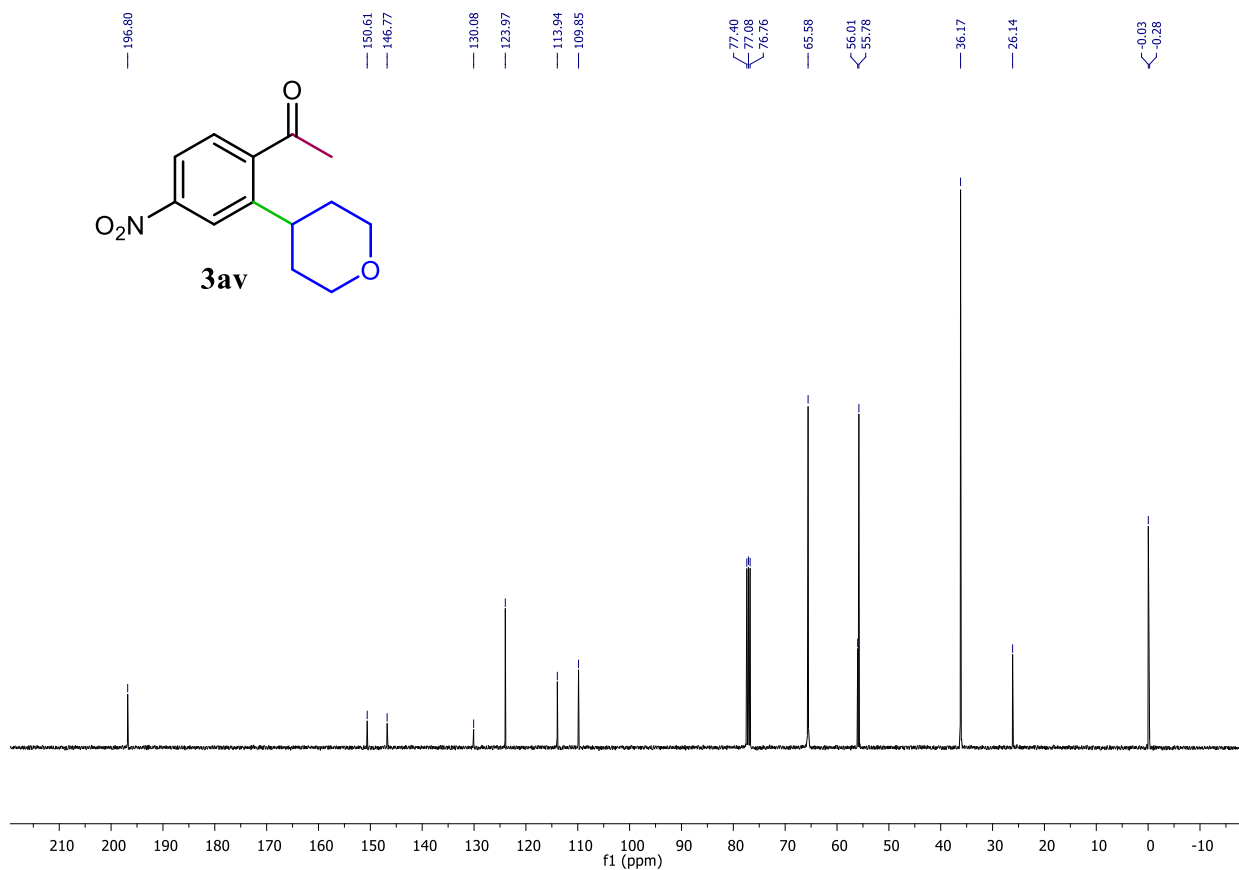

**$^1\text{H}$  NMR of 3aw (400 MHz, 32 scans, RT,  $\text{CDCl}_3$ )**

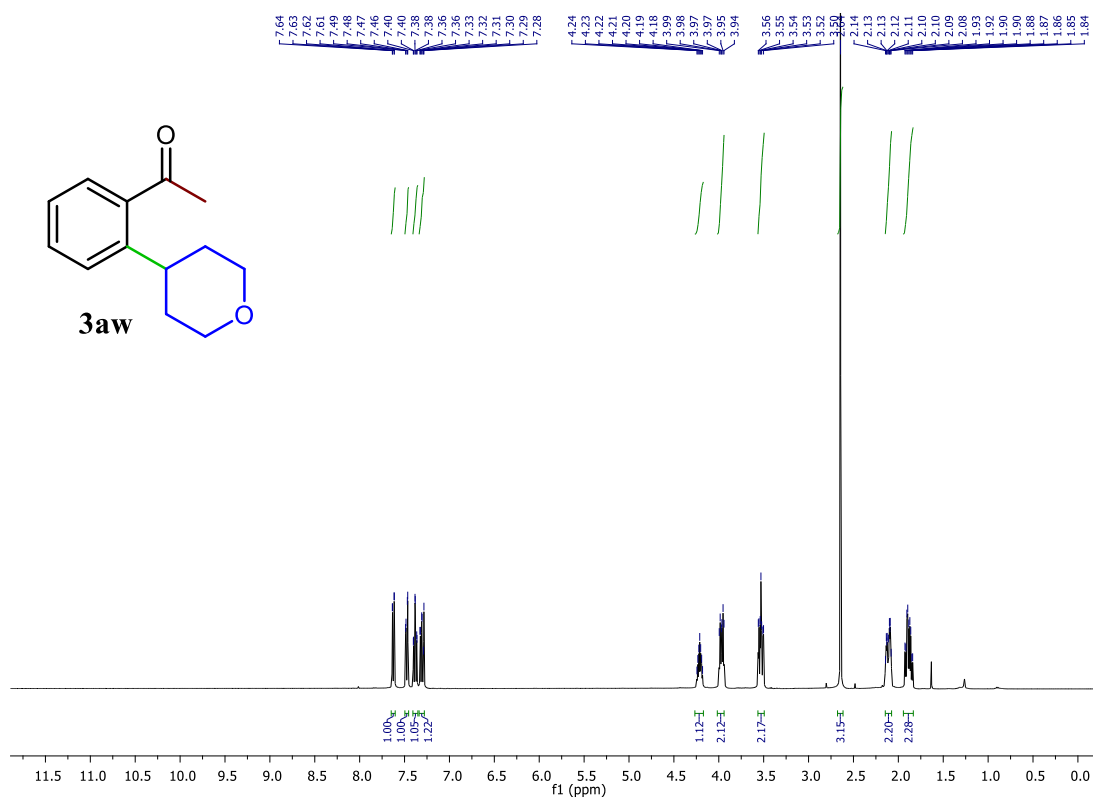

**$^{13}\text{C}$  NMR of 3aw (101 MHz, 512 scans, RT,  $\text{CDCl}_3$ )**

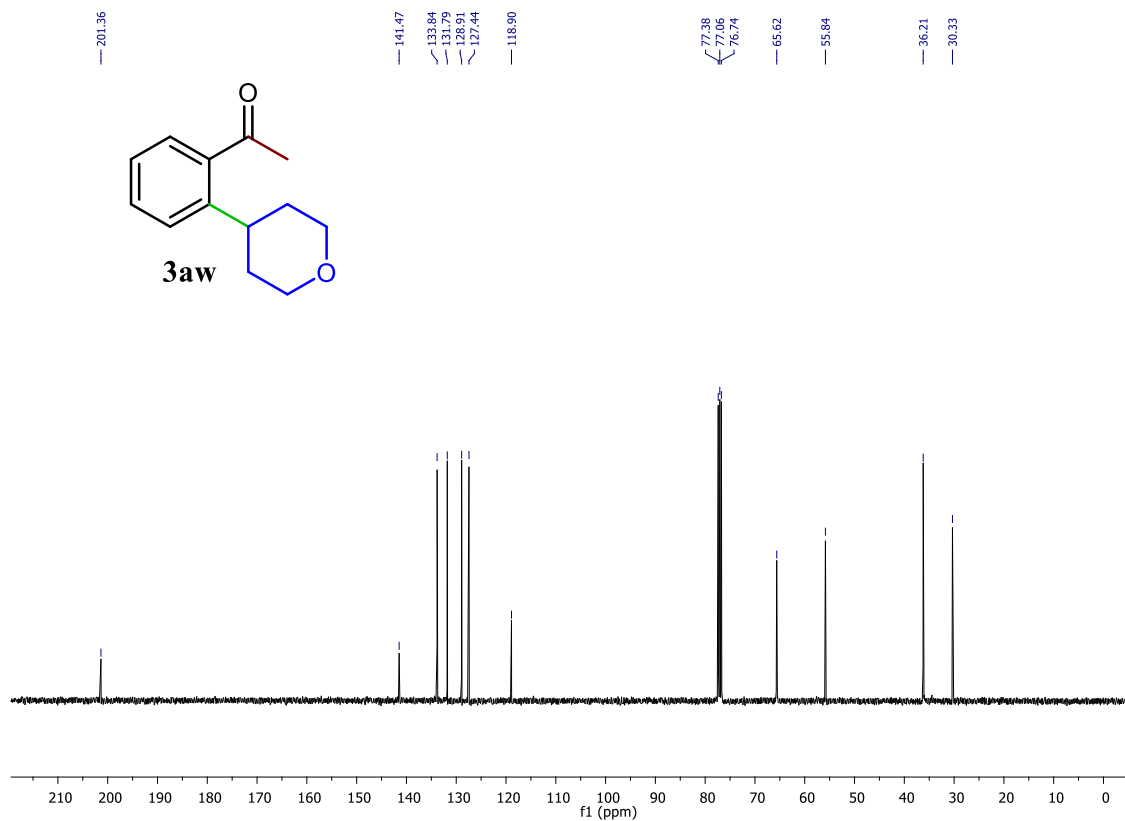

**3ax**

O=C(c1ccccc1)c2ccccc2

1H NMR spectrum (CDCl<sub>3</sub>) of compound **3ax**. The x-axis represents the chemical shift in ppm, ranging from 12.0 to -1.0. The spectrum shows several peaks corresponding to the structure of **3ax**.

Chemical structure of **3ax** is shown above the spectrum. It consists of a benzene ring substituted with a morpholine group and a benzoyl group.

Key peaks and integration values are labeled below the spectrum:

- Aromatic protons (7.2-7.8 ppm): Integration values 2.00, 1.96, 2.15, 0.85, 1.91.
- Morphine protons (3.9-4.2 ppm): Integration values 1.72, 2.86, 2.23.
- Benzoyl methyl protons (~1.8 ppm): Integration values 2.21, 2.52.

**3ax**

Chemical structure of **3ax** is shown. The structure consists of a benzene ring substituted with a morpholine group and a benzoyl group.

The <sup>13</sup>C NMR spectrum (f1 (ppm)) shows the following peaks (ppm):

- 195.53
- 137.16
- 136.30
- 132.64
- 131.59
- 131.54
- 129.90
- 128.38
- 127.46
- 77.40
- 77.08
- 76.76
- 65.59
- 55.81
- 36.20
- 0

**$^1\text{H}$  NMR of 3ay (400 MHz, 32 scans, RT,  $\text{CDCl}_3$ )**

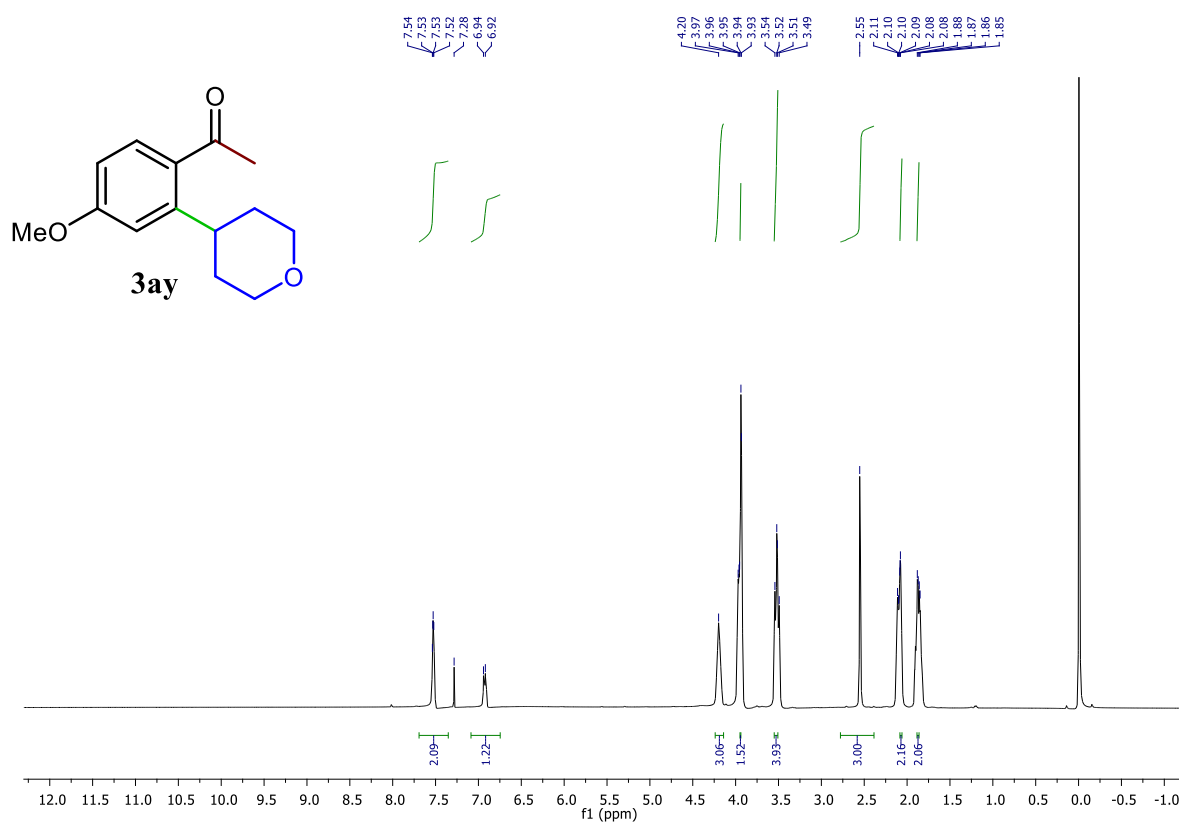

**$^{13}\text{C}$  NMR of 3ay (101 MHz, 512 scans, RT,  $\text{CDCl}_3$ )**

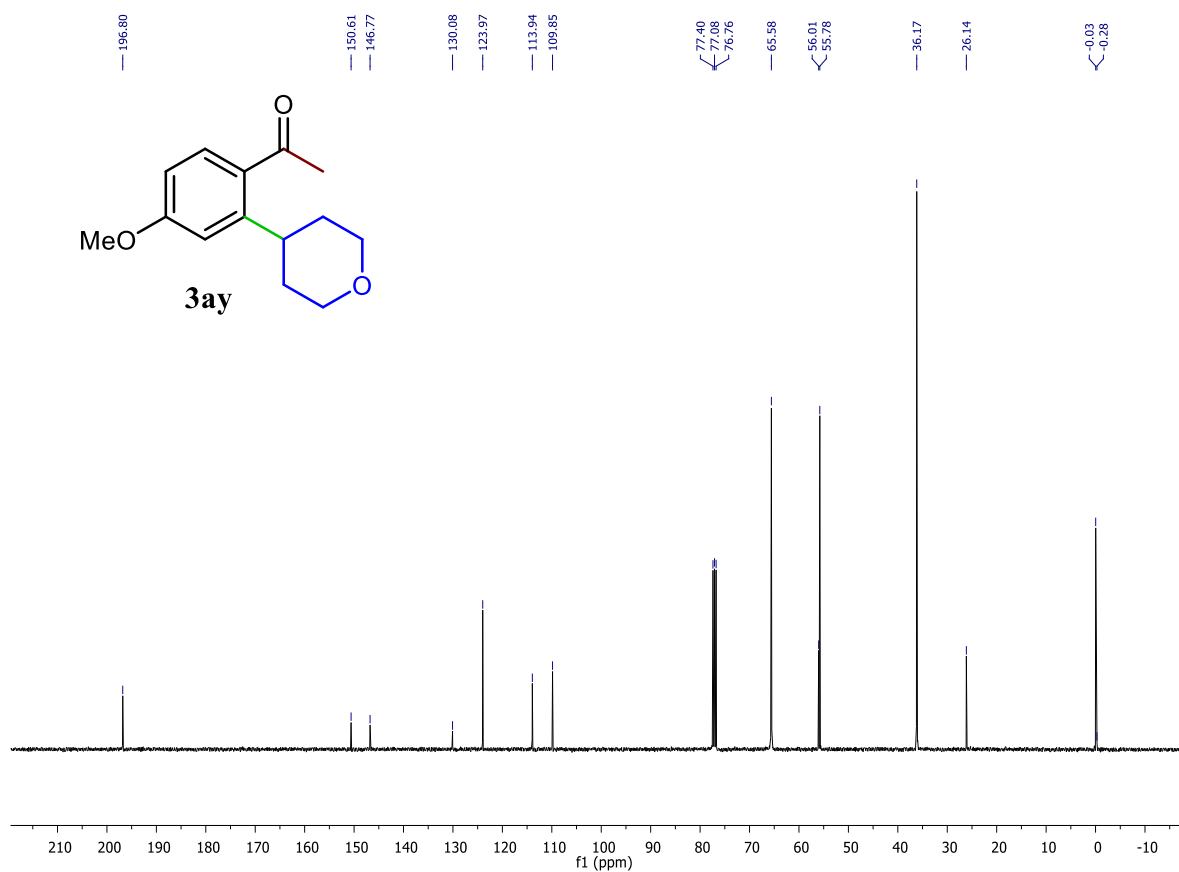

**<sup>1</sup>H NMR of 3az (400 MHz, 32 scans, RT, CDCl<sub>3</sub>)**

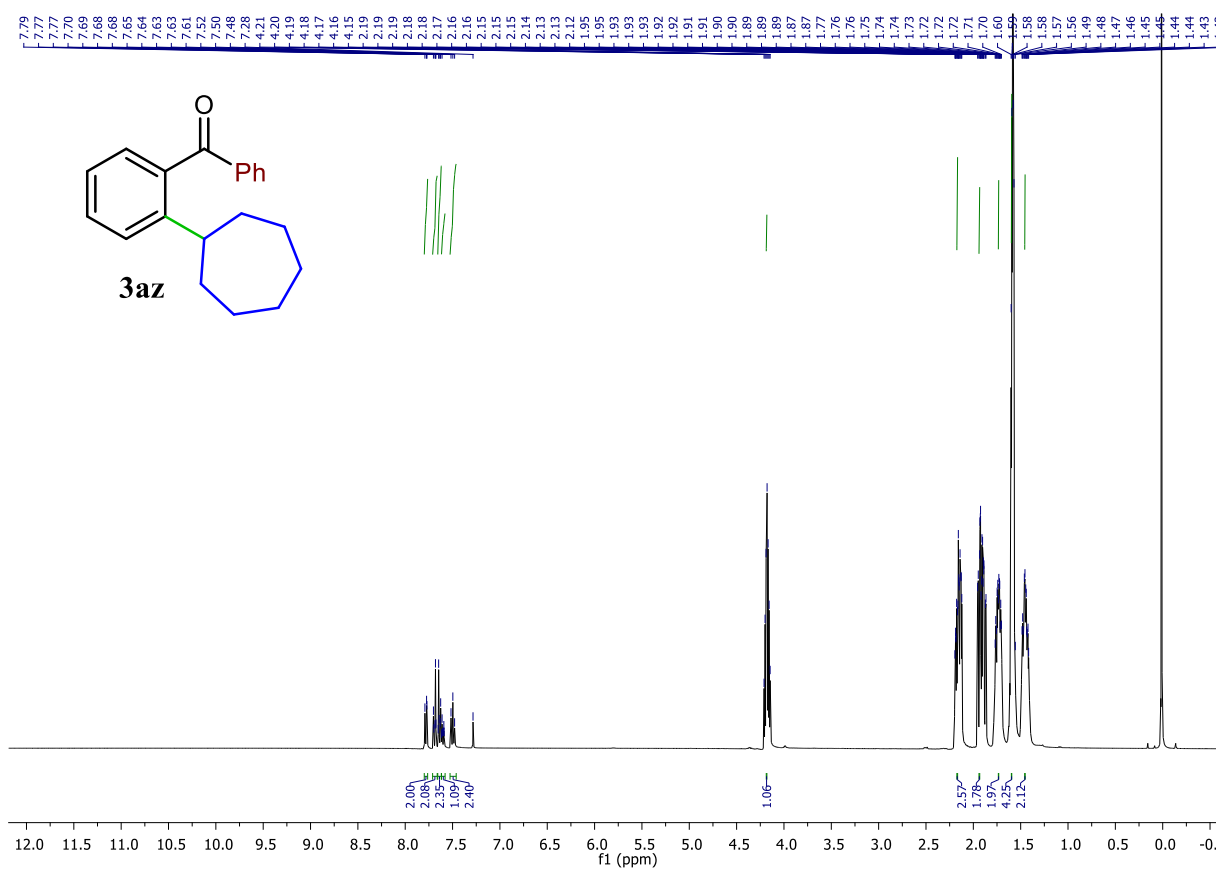

**<sup>13</sup>C NMR of 3az (101 MHz, 512 scans, RT, CDCl<sub>3</sub>)**

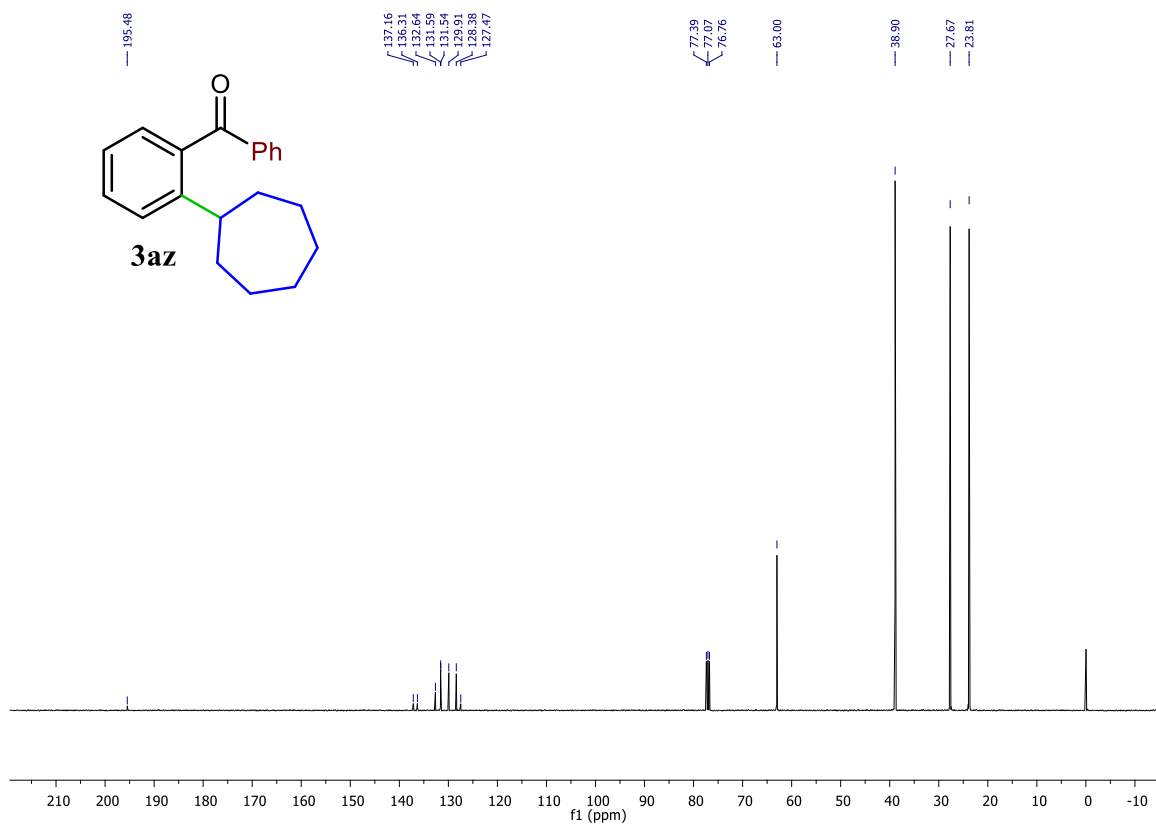

**<sup>1</sup>H NMR of 3ba (400 MHz, 32 scans, RT, CDCl<sub>3</sub>)**

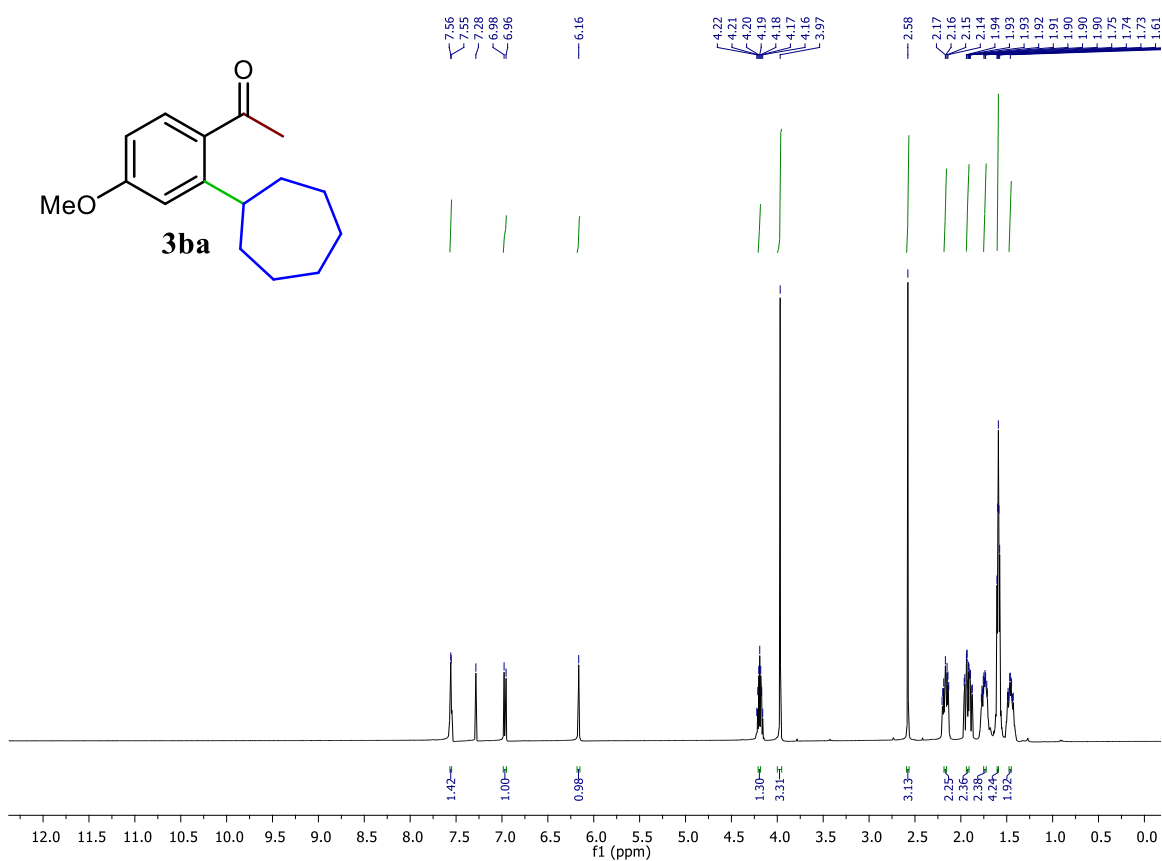

**NMR of 3ba (101 MHz, 512 scans, RT, CDCl<sub>3</sub>)**

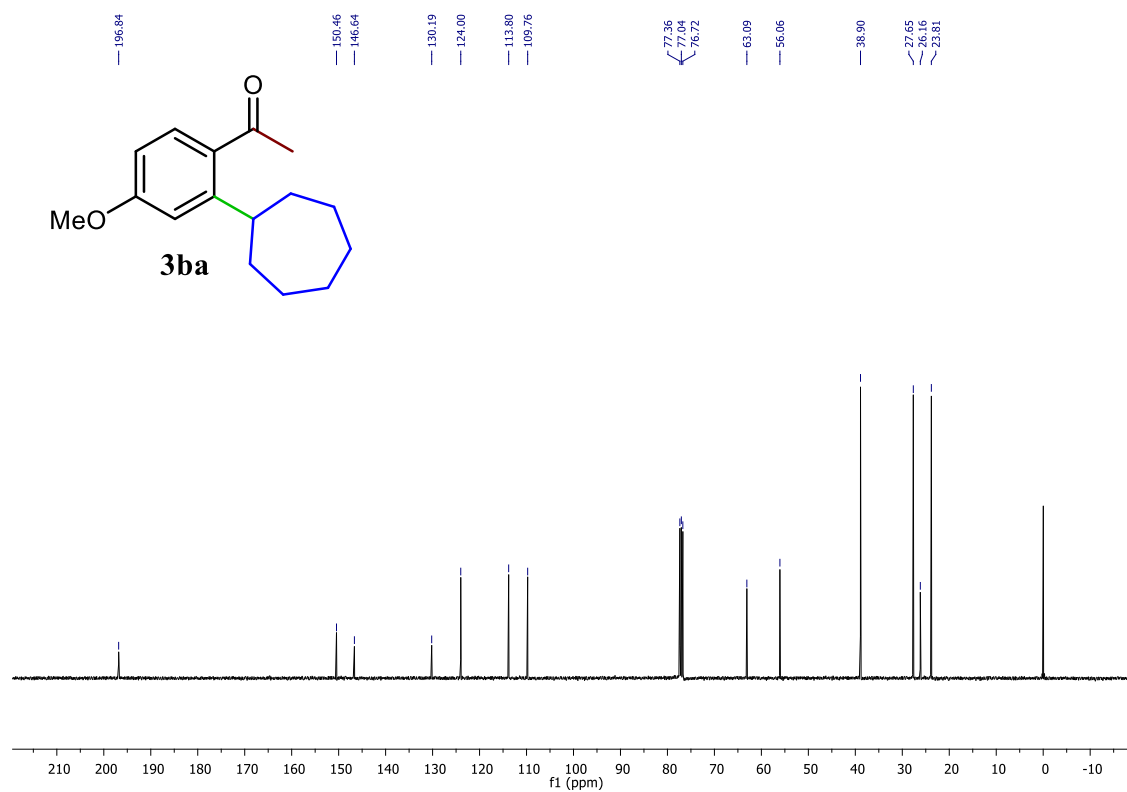

Chemical structure of **3bb** is shown above the spectrum. The structure is 1-(4-nitrophenyl)-7-oxabicyclo[4.1.0]hept-2-ene-2-carboxylic acid. The spectrum displays the following chemical shifts (ppm):

| Chemical Shift (ppm) |
|----------------------|
| 196.84               |
| 150.46               |
| 146.64               |
| 130.19               |
| 124.00               |
| 113.80               |
| 109.76               |
| 77.56                |
| 77.04                |
| 76.72                |
| 63.09                |
| 56.06                |
| 38.90                |
| 27.65                |
| 26.16                |
| 23.81                |



**$^1\text{H}$  NMR of 3bc (400 MHz, 32 scans, RT,  $\text{CDCl}_3$ )**

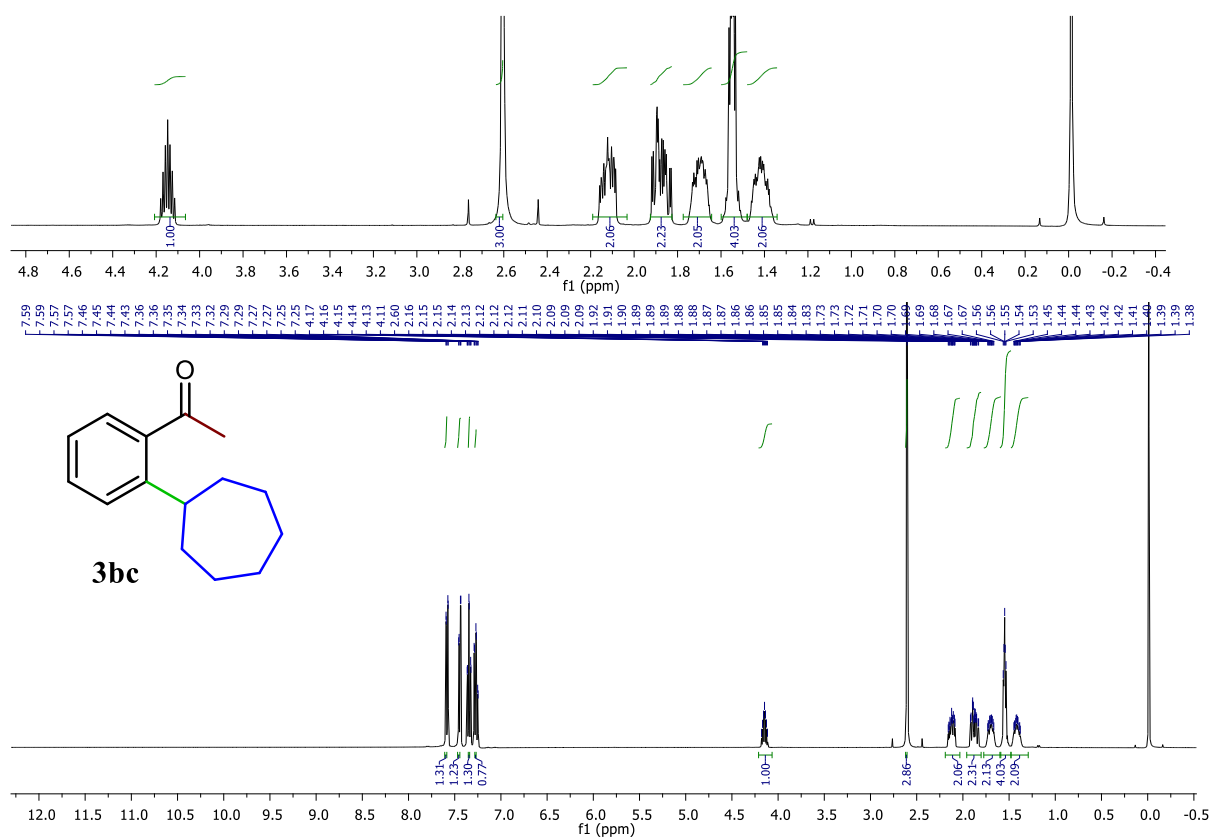

**NMR of 3bc (101 MHz, 512 scans, RT,  $\text{CDCl}_3$ )**

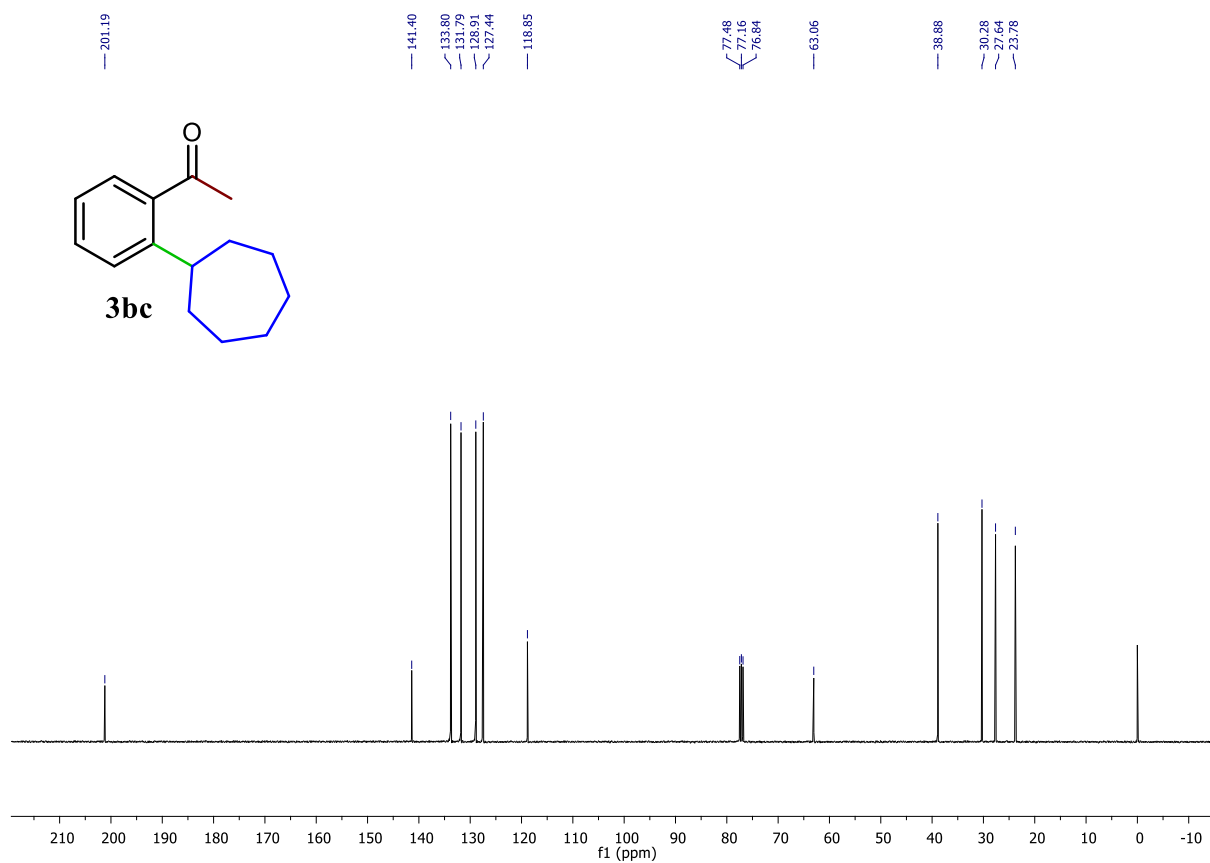

**<sup>1</sup>H NMR of 3bd (400 MHz, 32 scans, RT, CDCl<sub>3</sub>)**

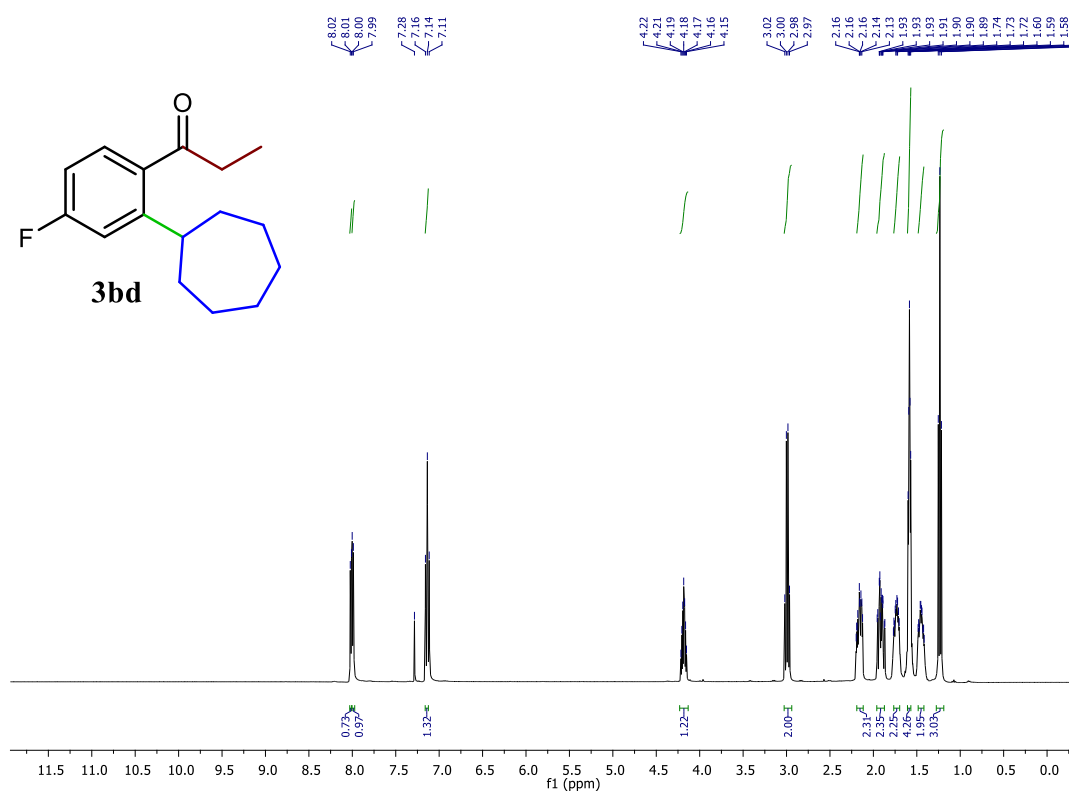

**NMR of 3bd (101 MHz, 512 scans, RT, CDCl<sub>3</sub>)**

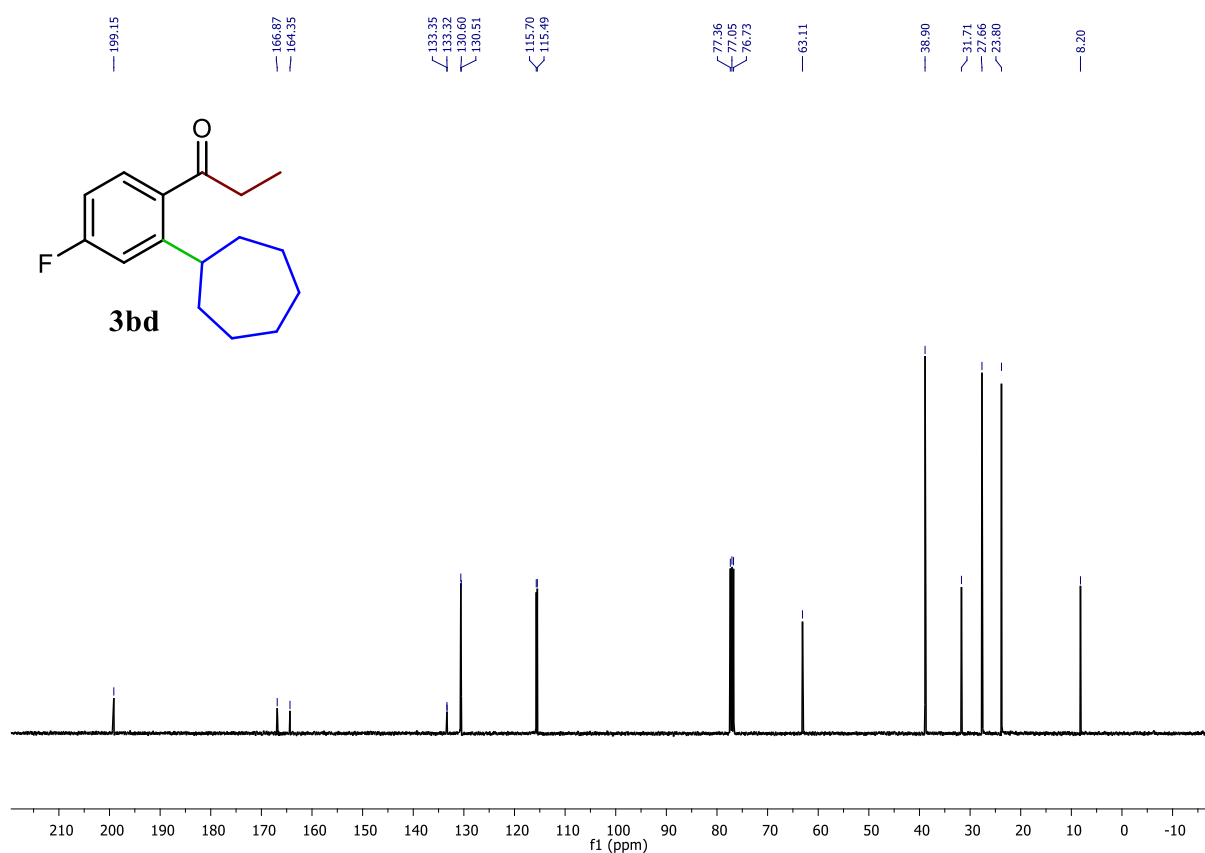

**$^1\text{H}$  NMR of 3be (400 MHz, 32 scans, RT,  $\text{CDCl}_3$ )**

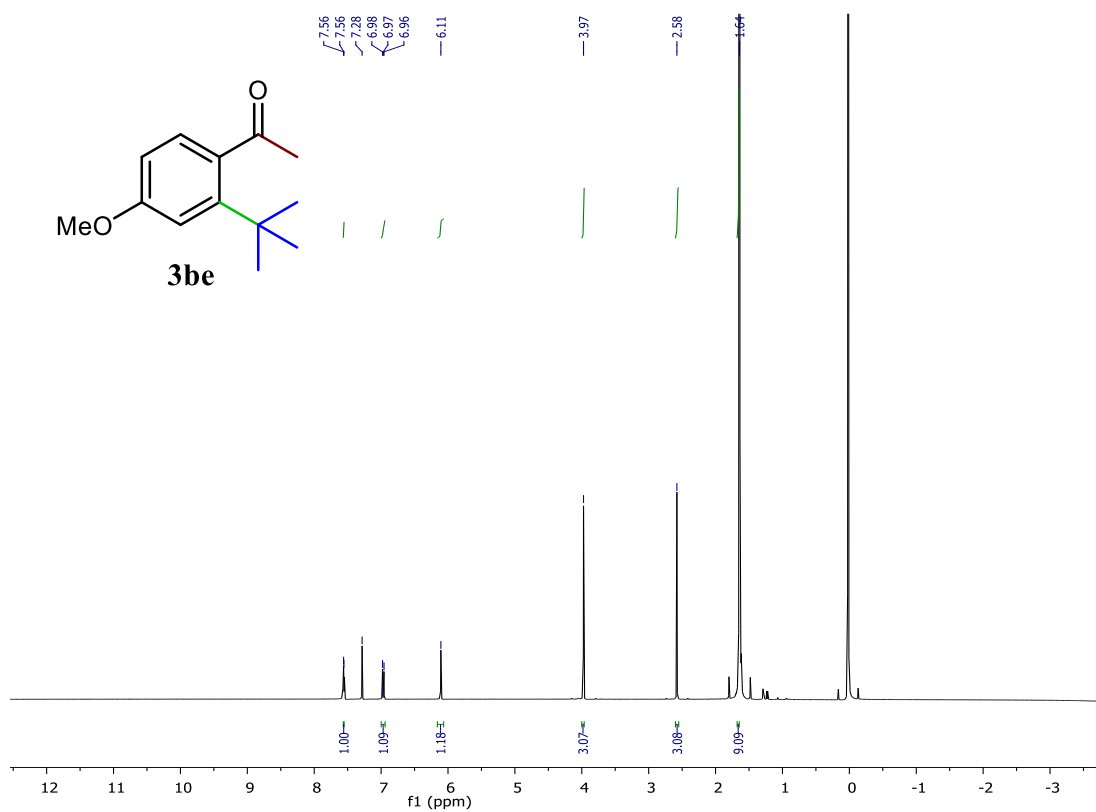

**NMR of 3be (101 MHz, 512 scans, RT,  $\text{CDCl}_3$ )**

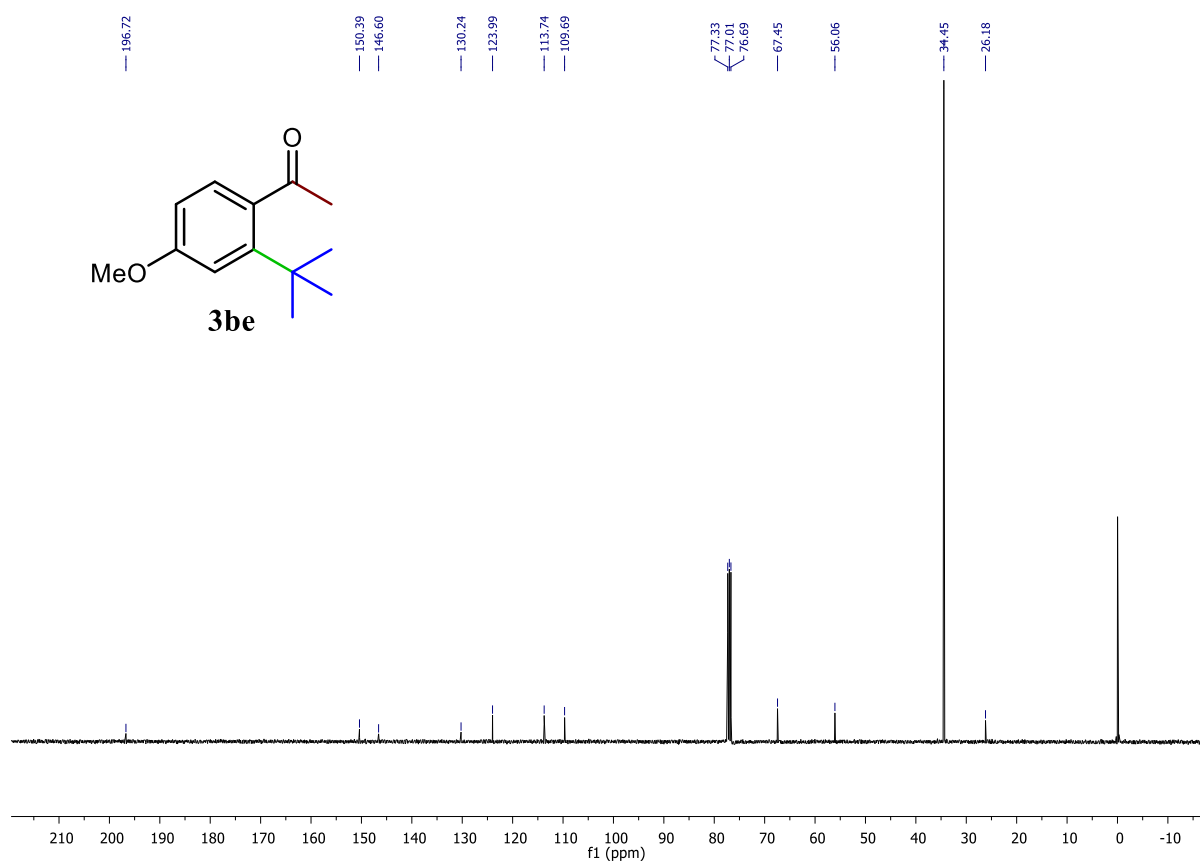

**<sup>1</sup>H NMR of 3bf (400 MHz, 32 scans, RT, CDCl<sub>3</sub>)**

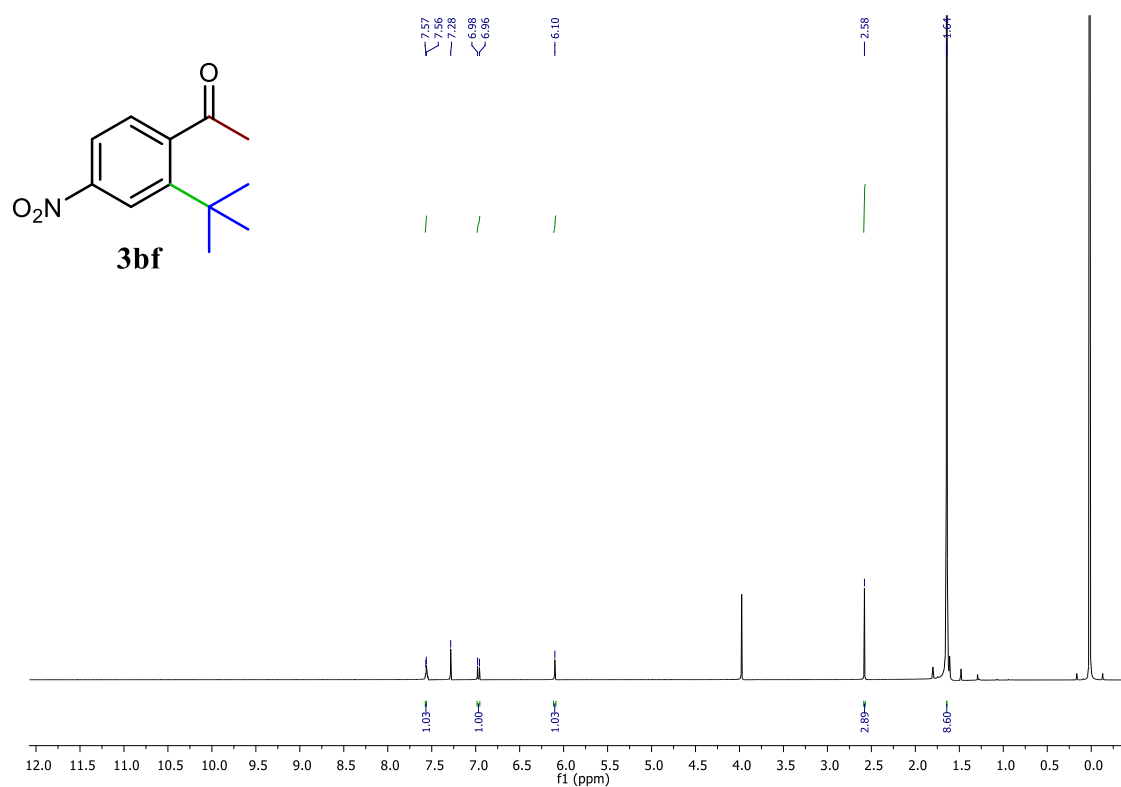

**<sup>13</sup>C NMR of 3bf (101 MHz, 512 scans, RT, CDCl<sub>3</sub>)**

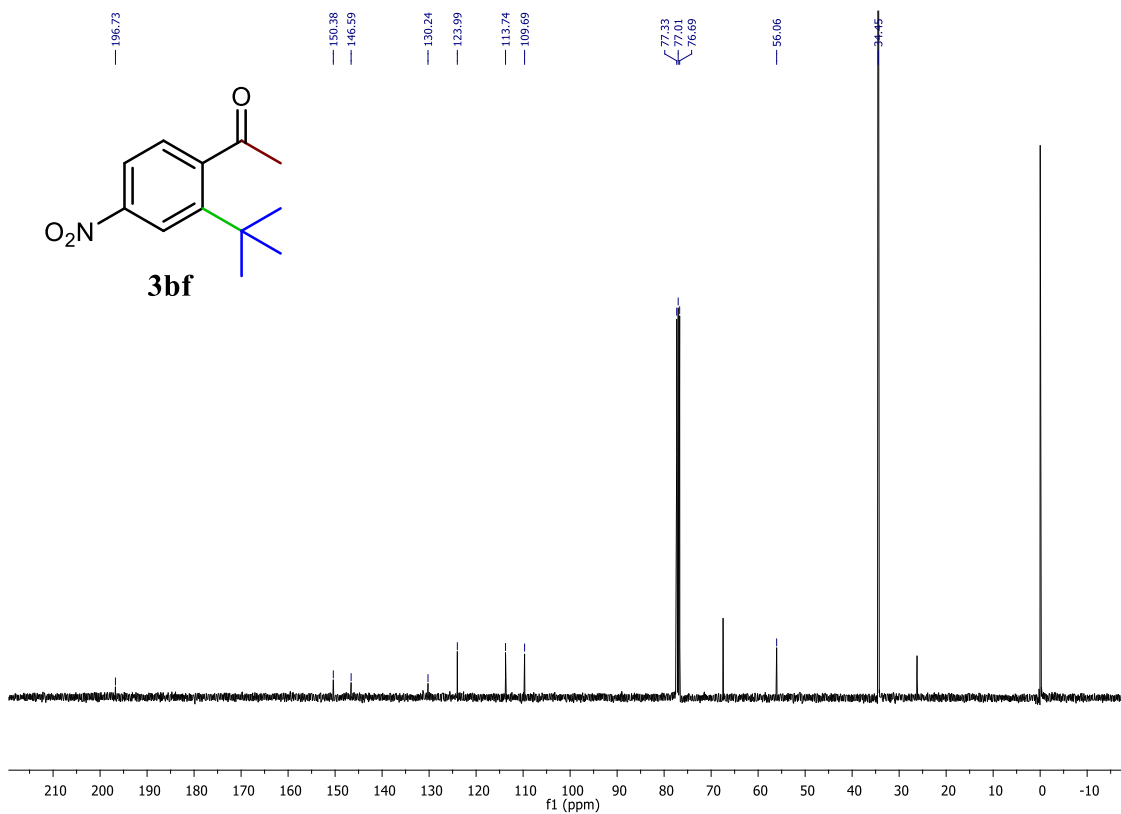

**$^1\text{H}$  NMR of 3bg (400 MHz, 32 scans, RT,  $\text{CDCl}_3$ )**

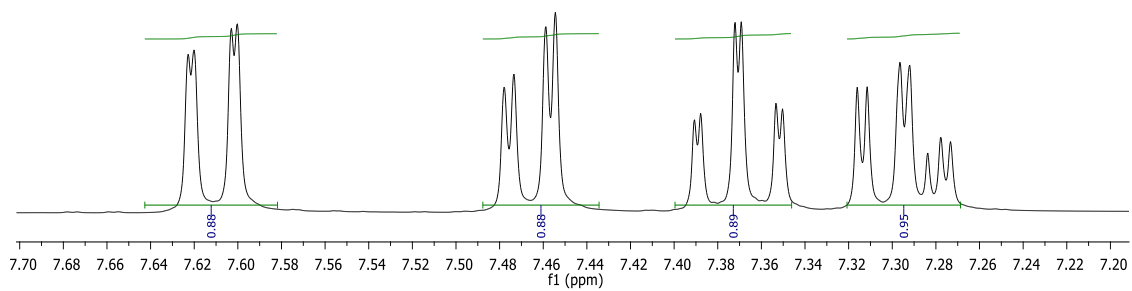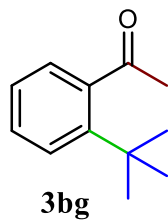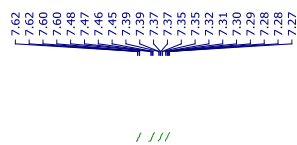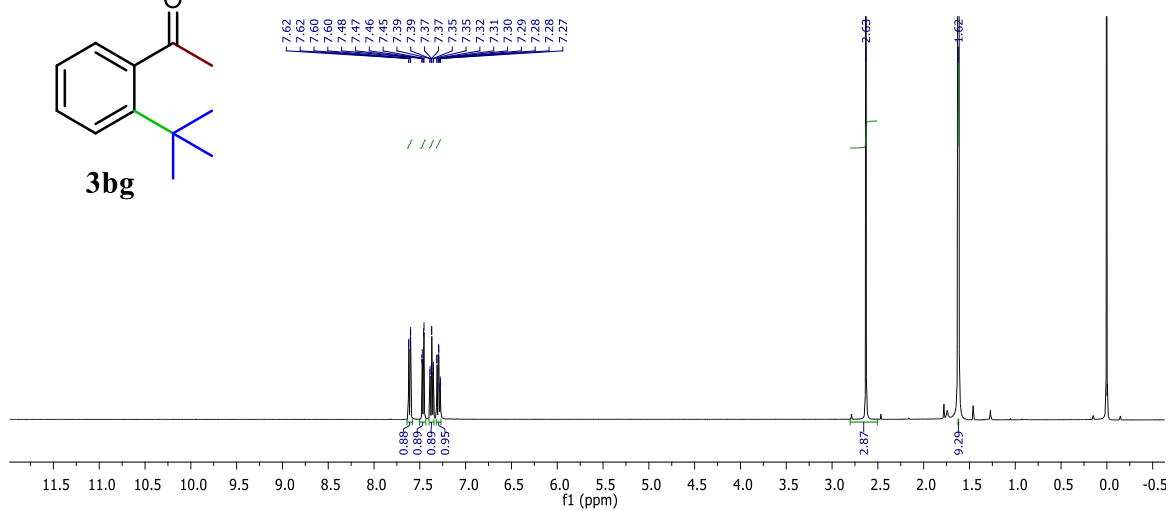

**$^{13}\text{C}$  NMR of 3bg (101 MHz, 512 scans, RT,  $\text{CDCl}_3$ )**

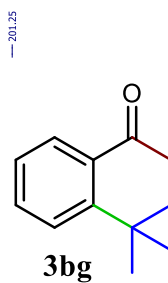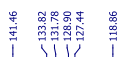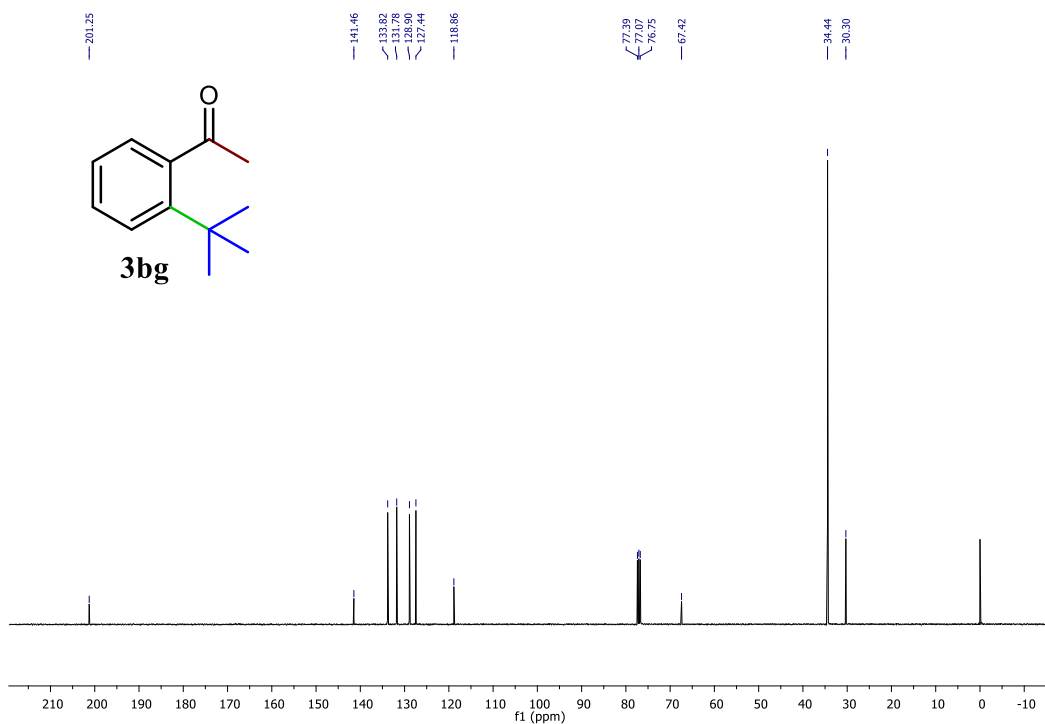

**$^1\text{H}$  NMR of 3bh (400 MHz, 32 scans, RT,  $\text{CDCl}_3$ )**

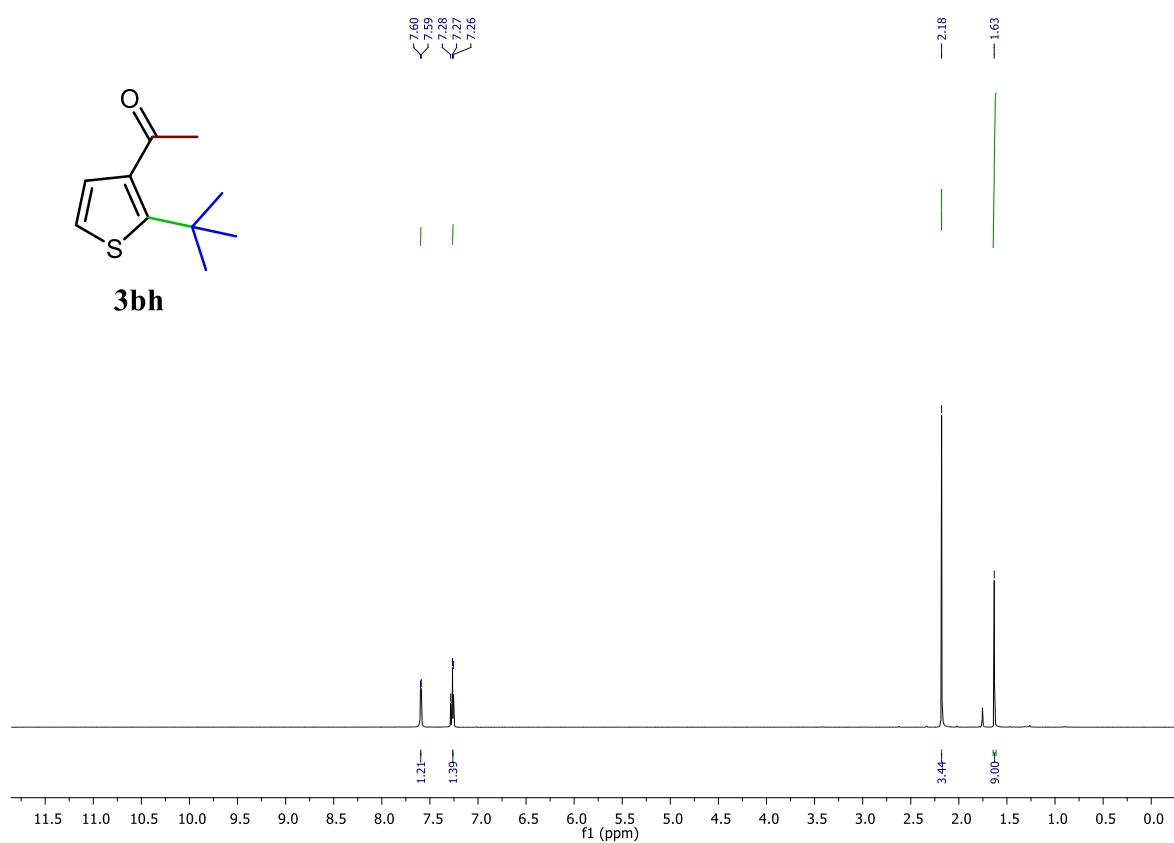

**NMR of 3bh (101 MHz, 512 scans, RT,  $\text{CDCl}_3$ )**

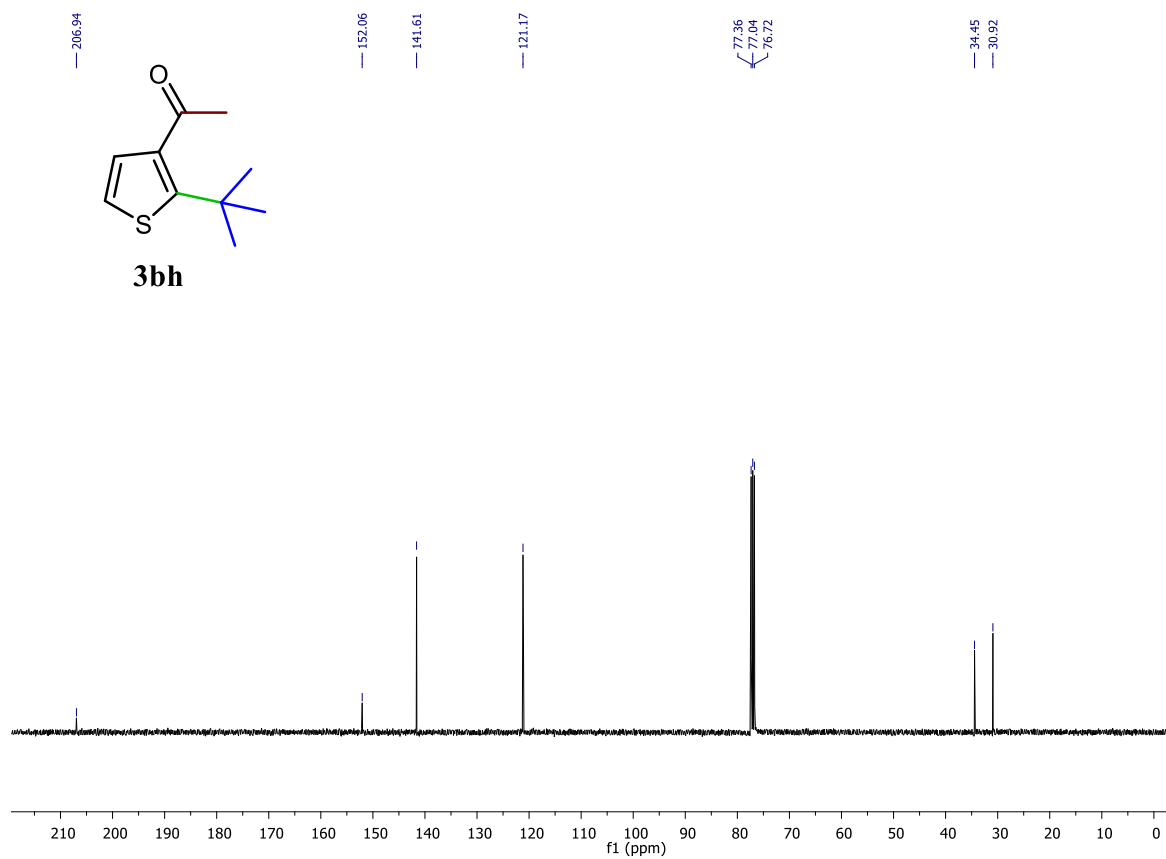

**3bi**

<sup>1</sup>H NMR spectrum (CDCl<sub>3</sub>) of compound **3bi**. The x-axis represents the chemical shift in ppm (f1), ranging from 12.0 to 0.0. The spectrum shows several peaks corresponding to the structure of **3bi**.

Chemical structure of **3bi** (1-(4-methylphenyl)-2-methylpropan-1-one) is shown above the spectrum.

Key peaks and integrations:

- Aromatic protons (multiplet, 7.03-7.22 ppm): Integration 2.35 and 1.35.
- Methyl ketone (singlet, 3.38 ppm): Integration 9.00.
- Aromatic methyl (doublet, 2.26-2.27 ppm): Integration 2.97 and 3.22.
- tert-butyl methyls (singlet, 1.60 ppm): Integration 9.00.

**3bi**

198.45

137.58  
133.38  
132.53  
131.39  
129.54  
128.20

40.59  
40.38  
40.17  
39.96  
39.75  
39.54  
39.33  
34.59

20.61  
19.51

f1 (ppm)

**$^1\text{H}$  NMR of 3bj (400 MHz, 32 scans, RT,  $\text{CDCl}_3$ )**

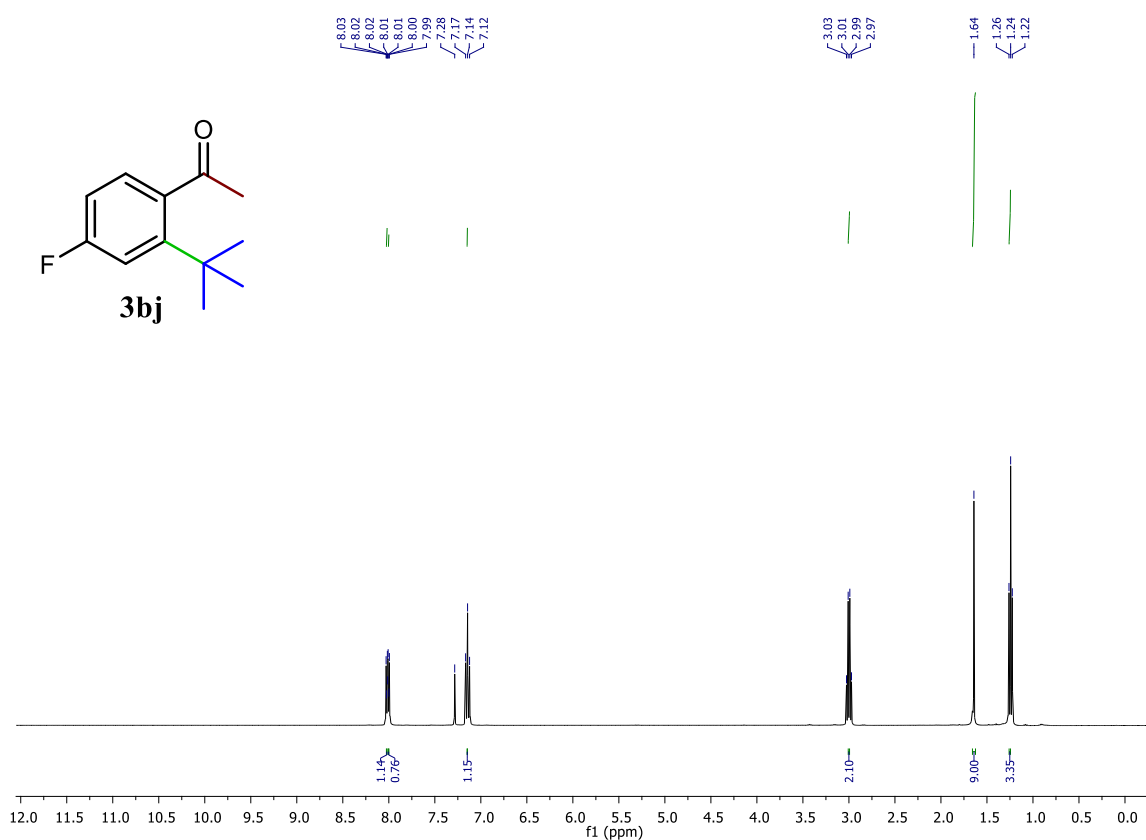

**$^{13}\text{C}$  NMR of 3bj (101 MHz, 512 scans, RT,  $\text{CDCl}_3$ )**

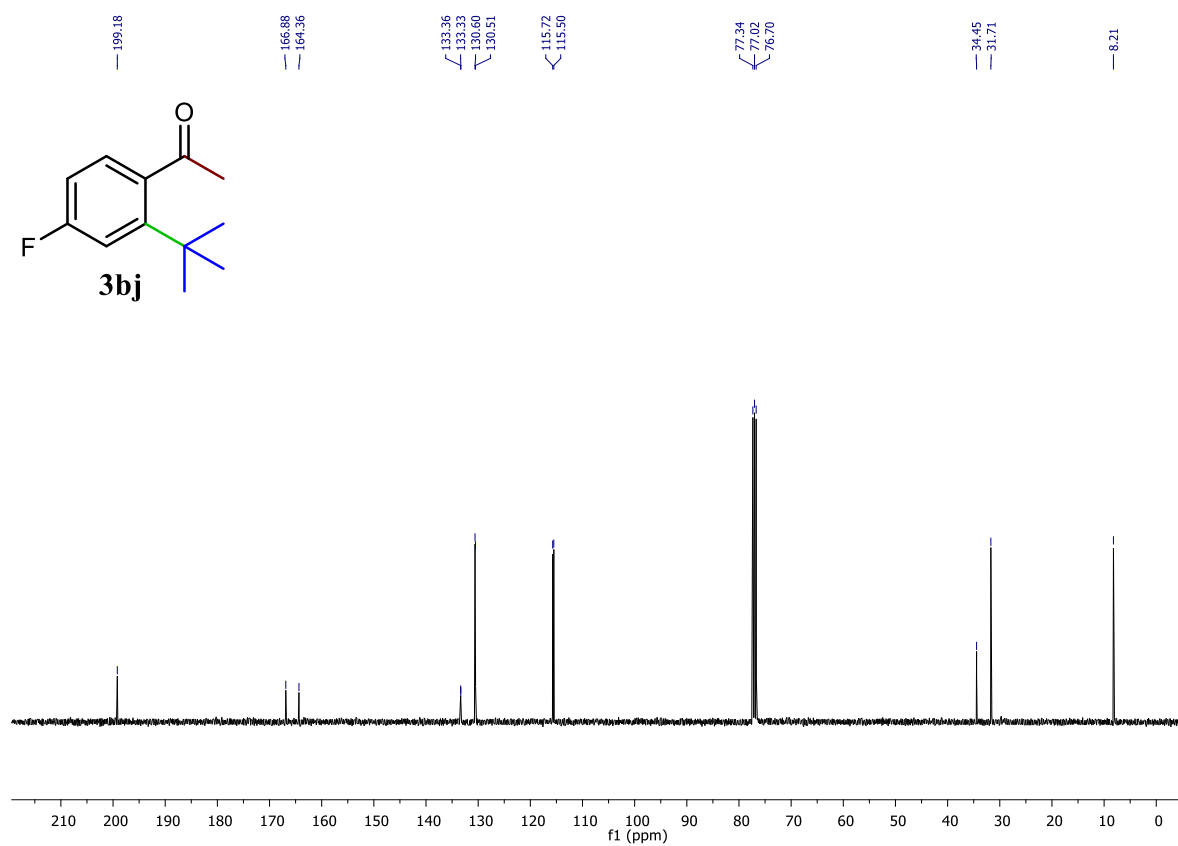



$^{19}\text{F}$  NMR of **3bj** (377 MHz,  $\text{CDCl}_3$ )

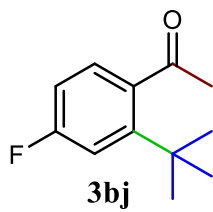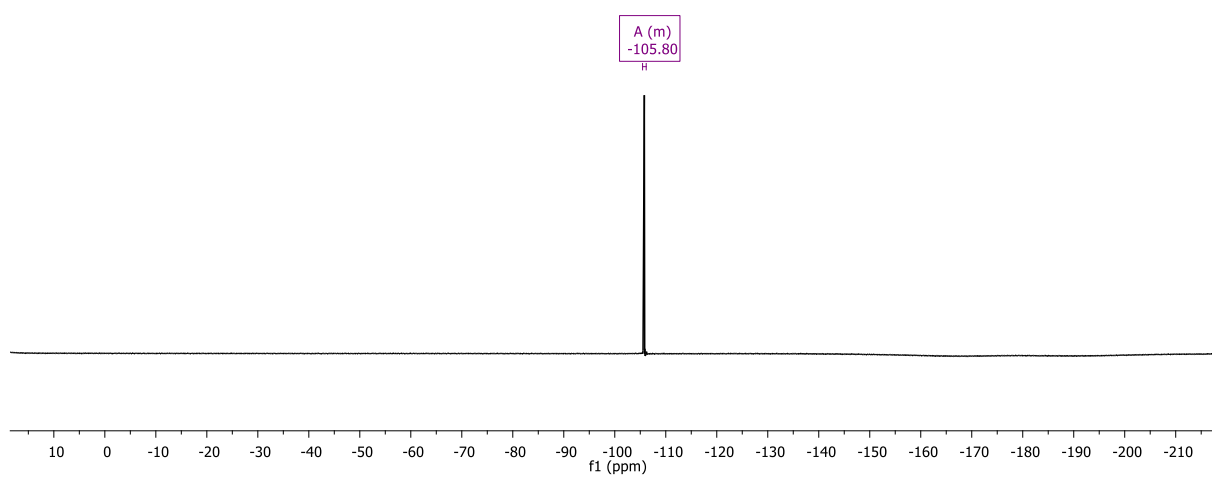

**$^1\text{H}$  NMR of 3bk (400 MHz, 32 scans, RT,  $\text{CDCl}_3$ )**

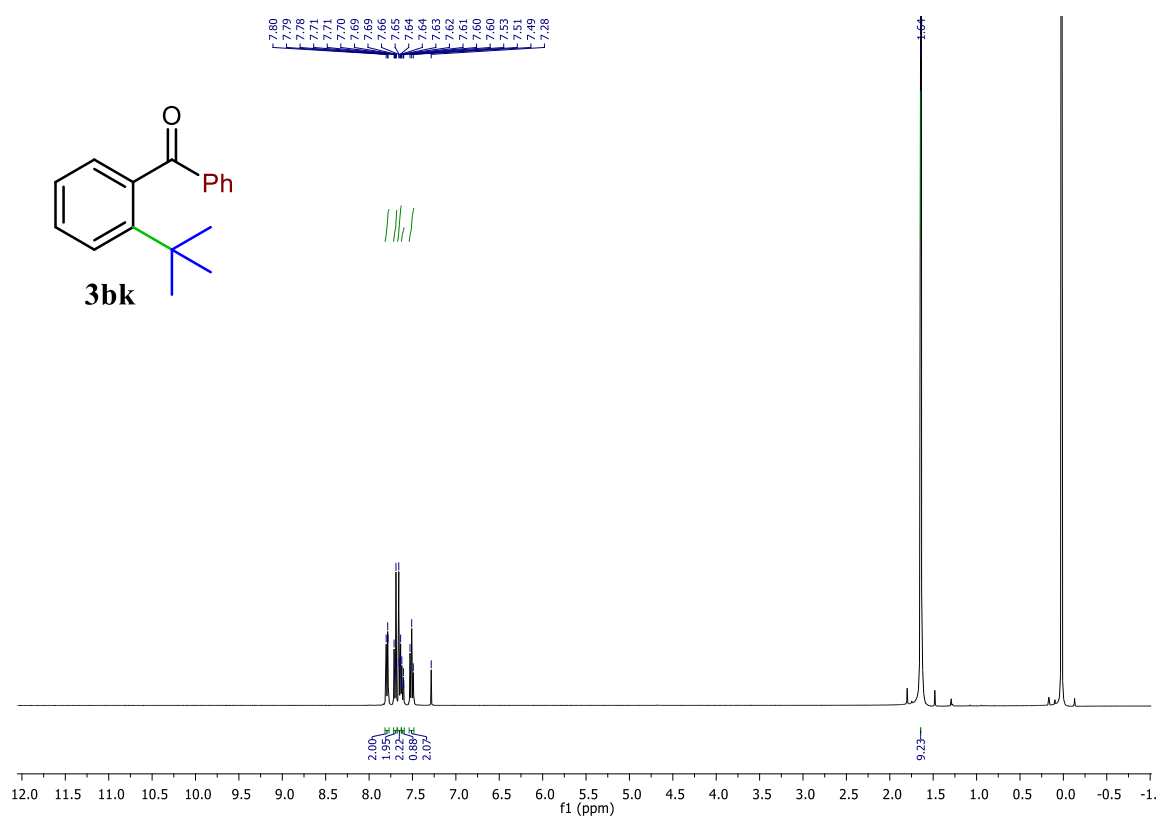

**$^{13}\text{C}$  NMR of 3bk (101 MHz, 512 scans, RT,  $\text{CDCl}_3$ )**

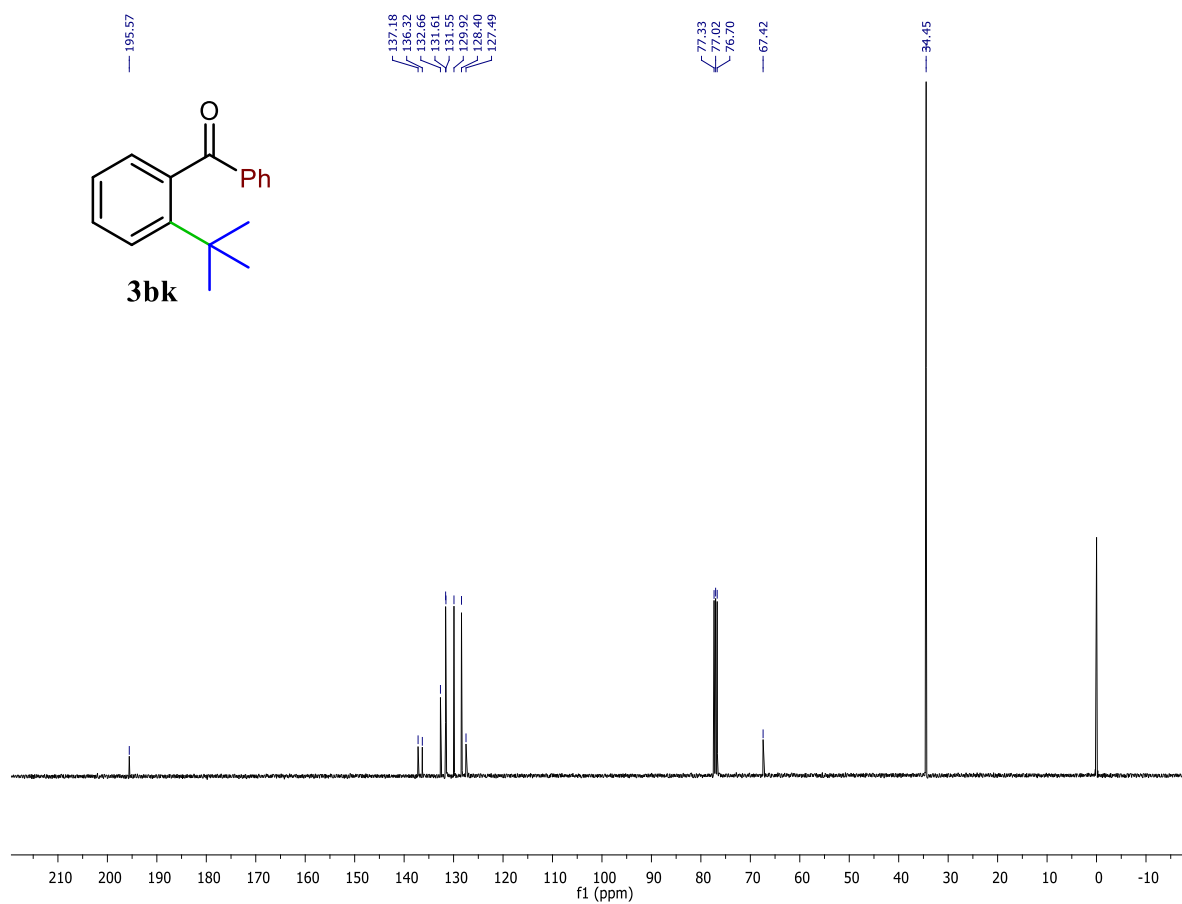

**<sup>1</sup>H NMR of 3bl (400 MHz, 32 scans, RT, CDCl<sub>3</sub>)**

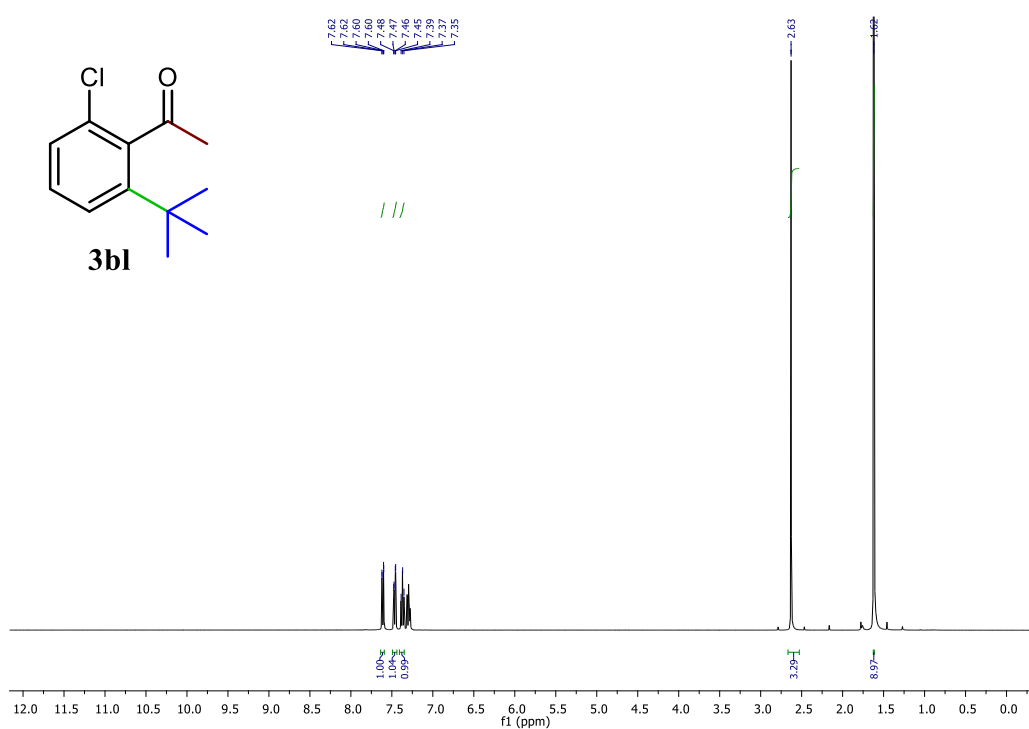

**<sup>13</sup>CNMR of 3bl (101 MHz, 512 scans, RT, CDCl<sub>3</sub>)**

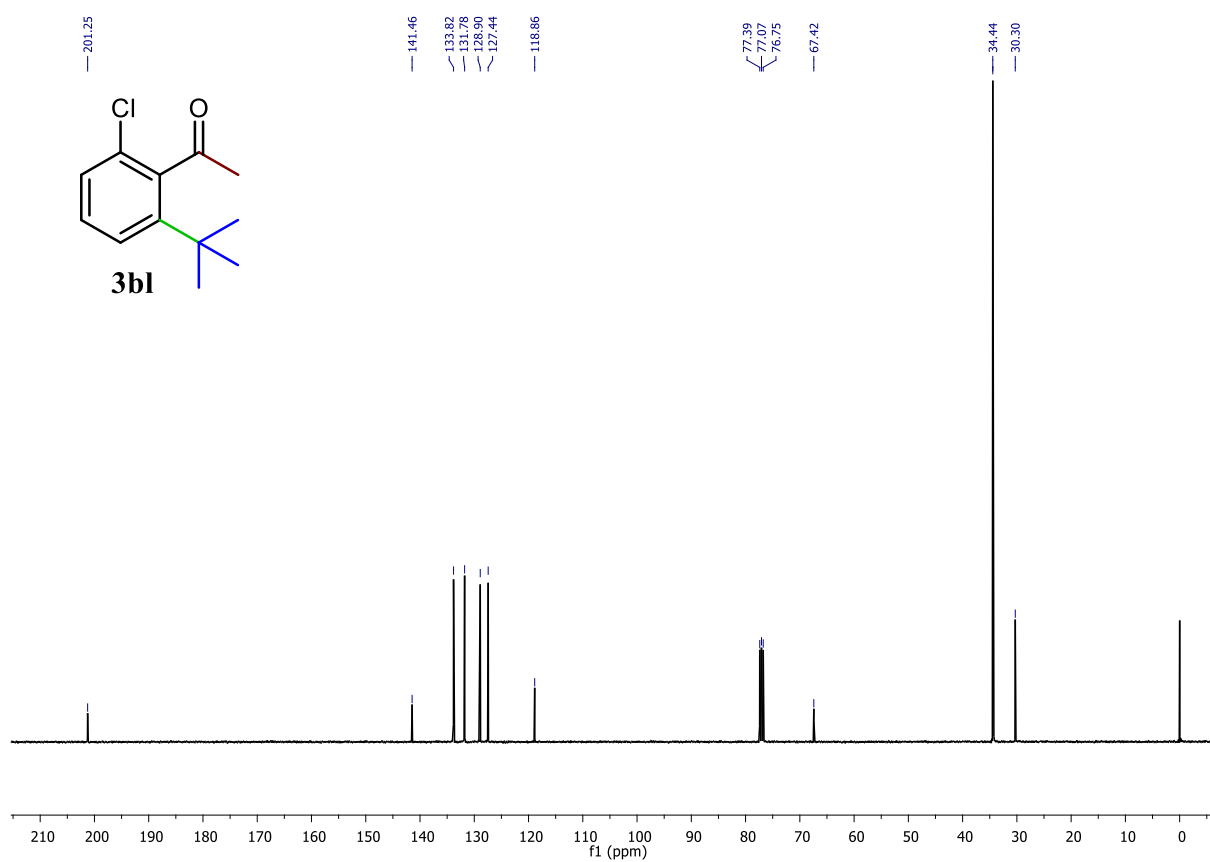

**$^1\text{H}$  NMR of 3bm (400 MHz, 32 scans, RT,  $\text{CDCl}_3$ )**

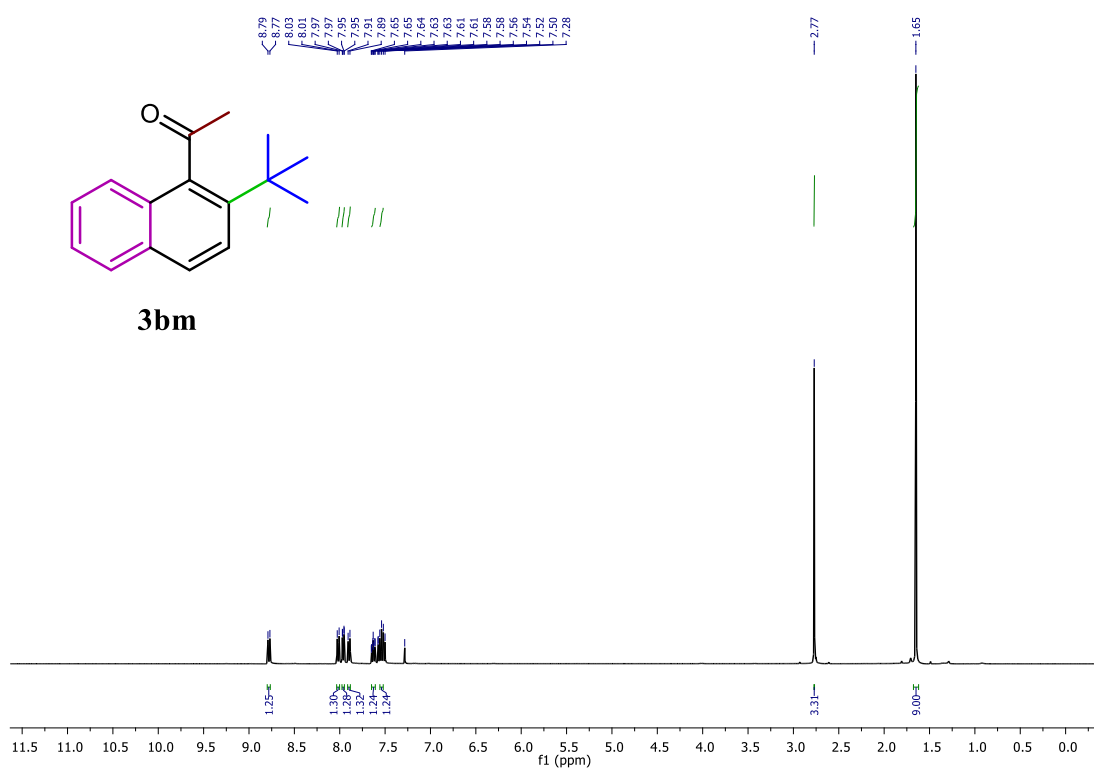

**$^{13}\text{C}$  NMR of 3bm (101 MHz, 512 scans, RT,  $\text{CDCl}_3$ )**

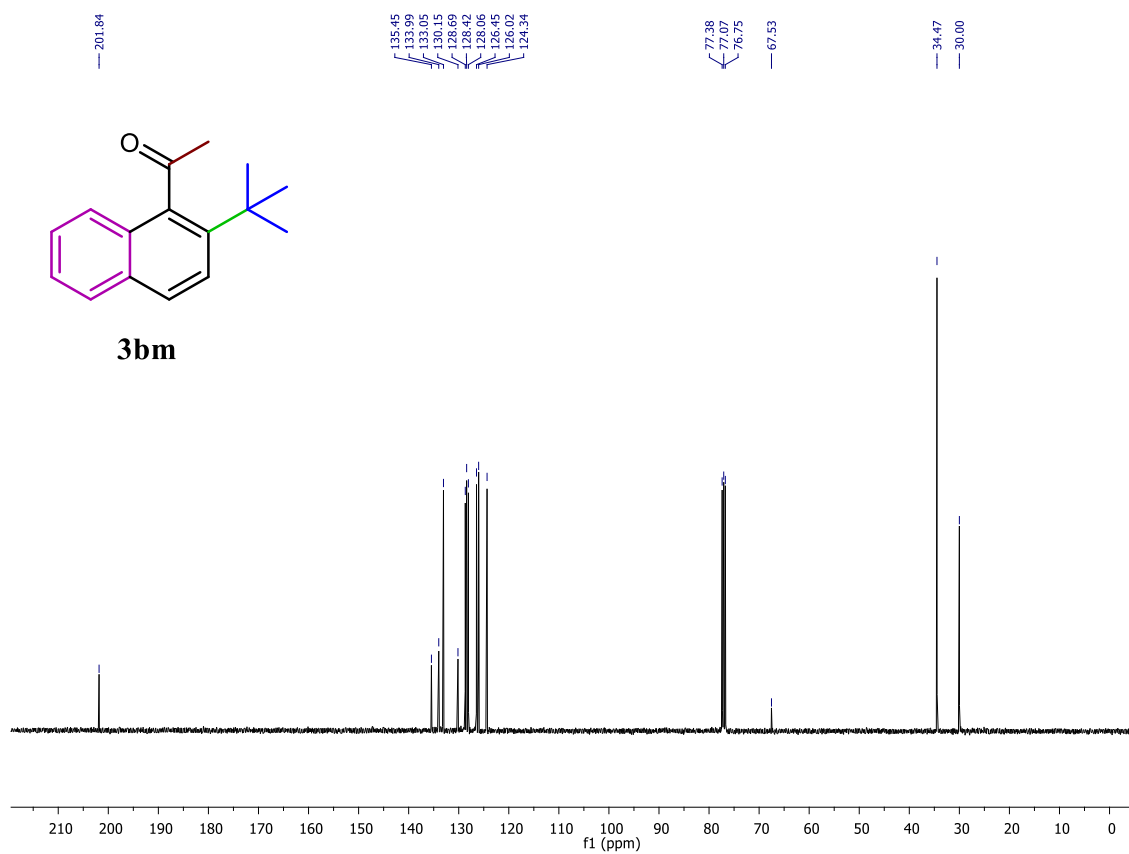

**$^1\text{H}$  NMR of 3bn (400 MHz, 32 scans, RT,  $\text{CDCl}_3$ )**

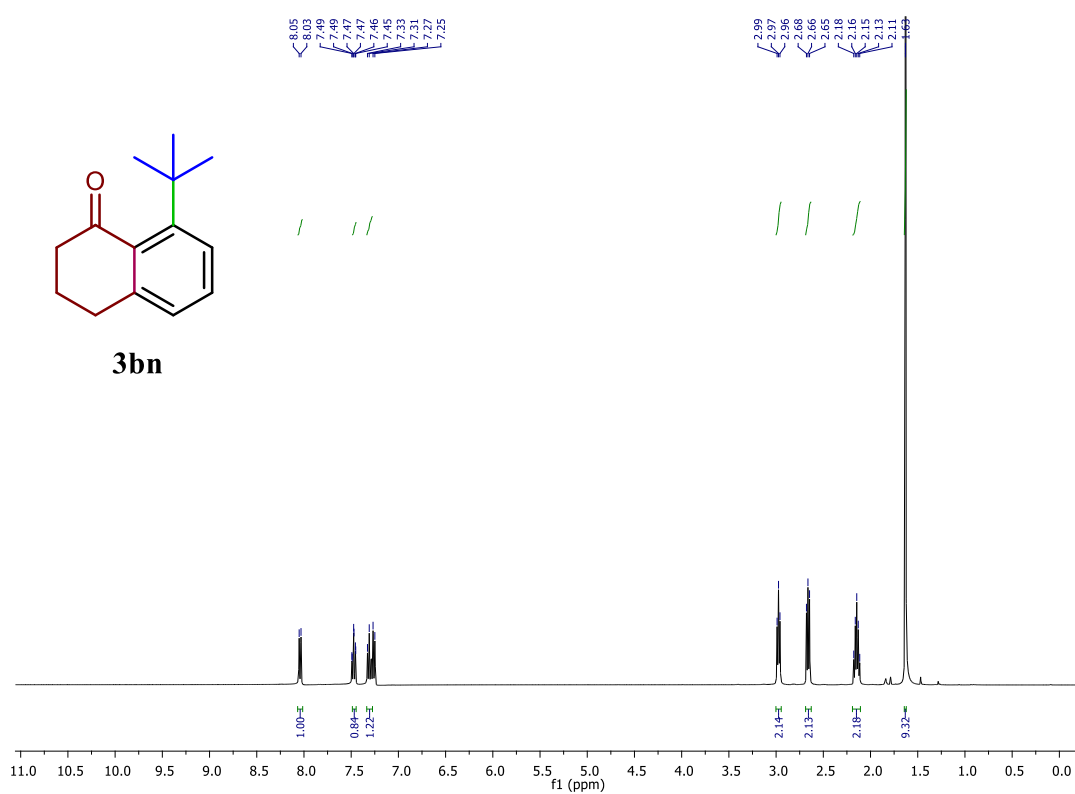

**$^{13}\text{C}$  NMR of 3bn (101 MHz, 512 scans, RT,  $\text{CDCl}_3$ )**

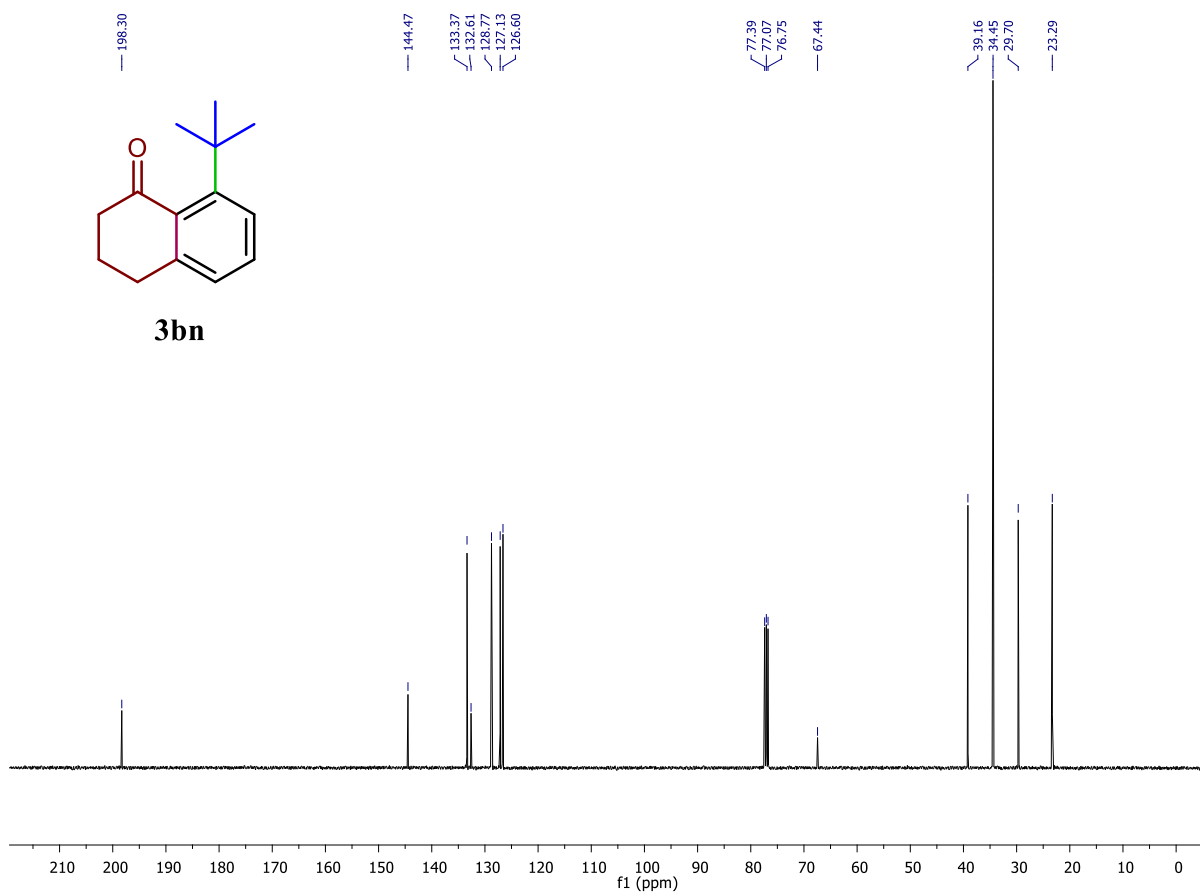

**$^1\text{H}$  NMR of 3bo (400 MHz, 32 scans, RT,  $\text{CDCl}_3$ )**

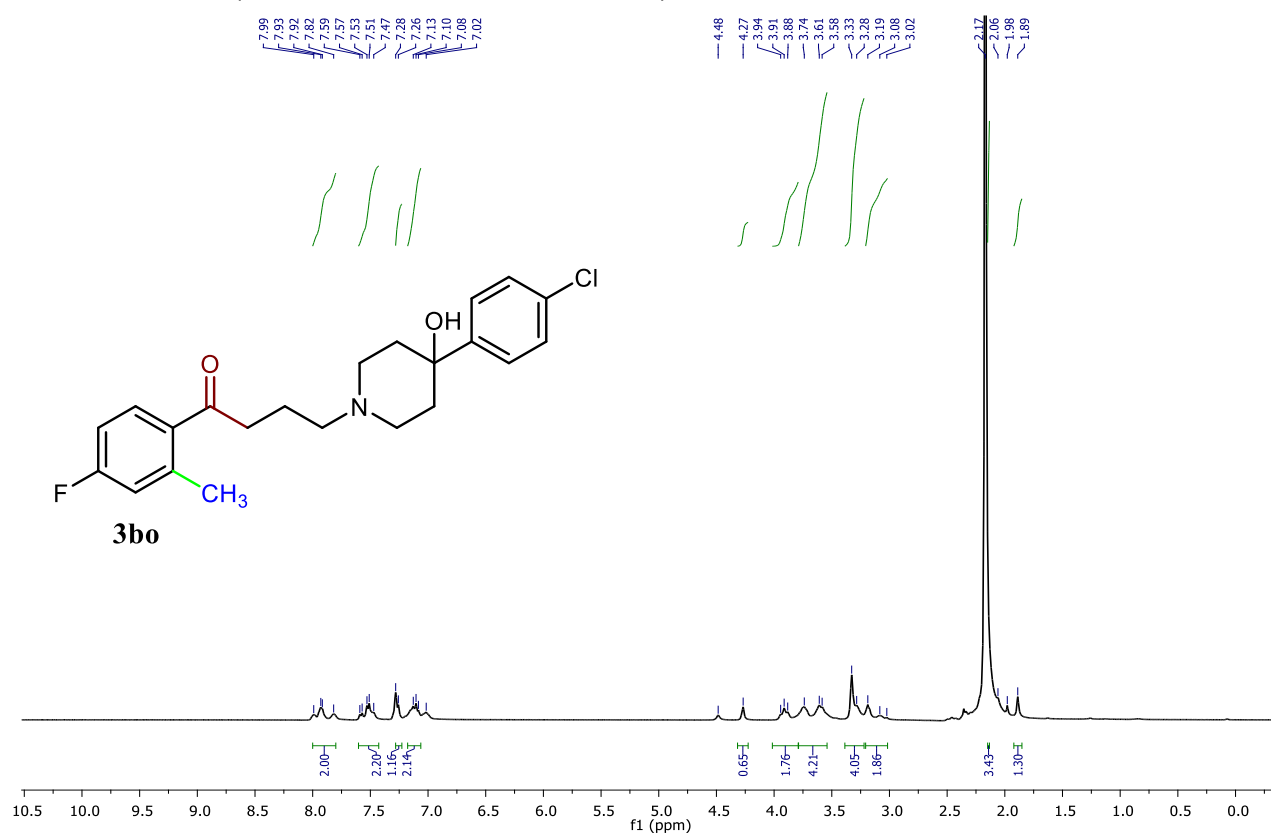

**$^{13}\text{C}$  NMR of 3bo (101 MHz, 512 scans, RT,  $\text{CDCl}_3$ )**

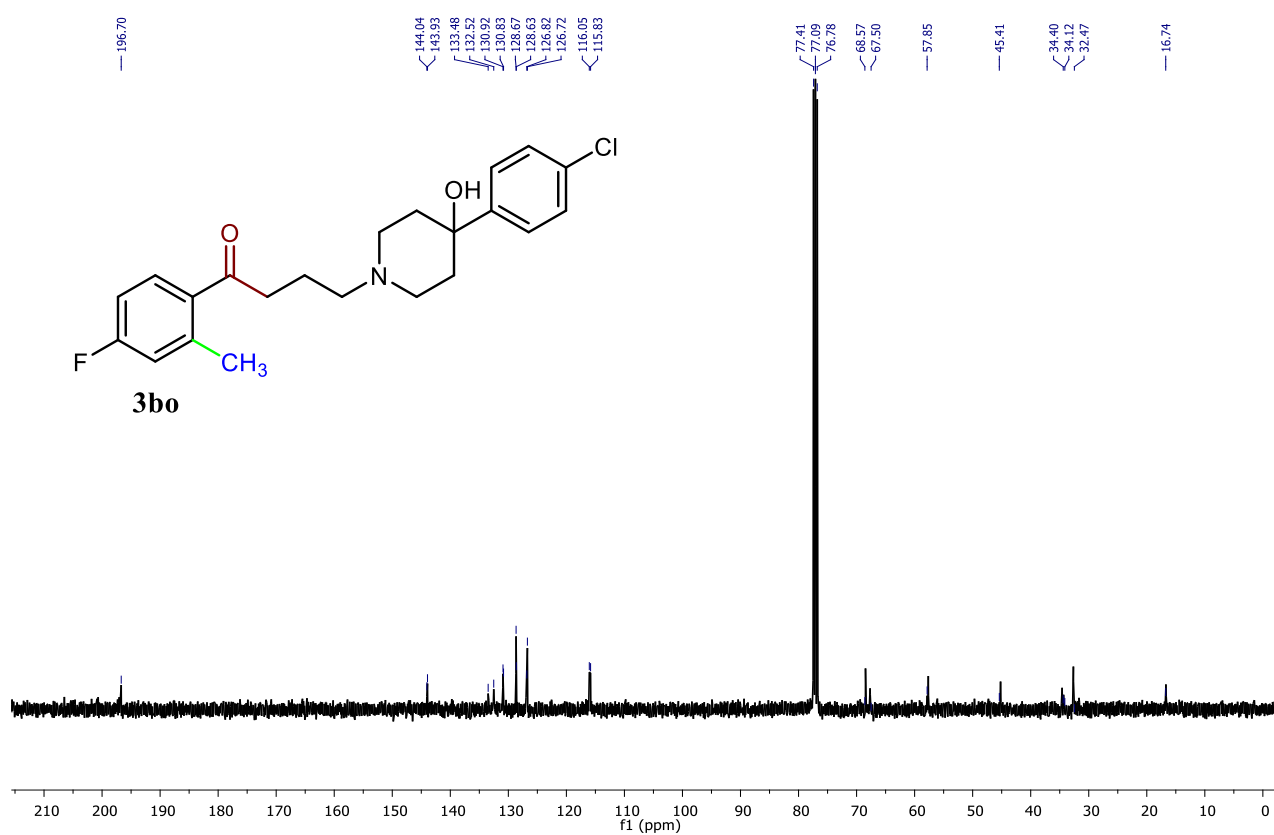

**<sup>1</sup>H NMR of 3bp (400 MHz, 32 scans, RT, CDCl<sub>3</sub>)**

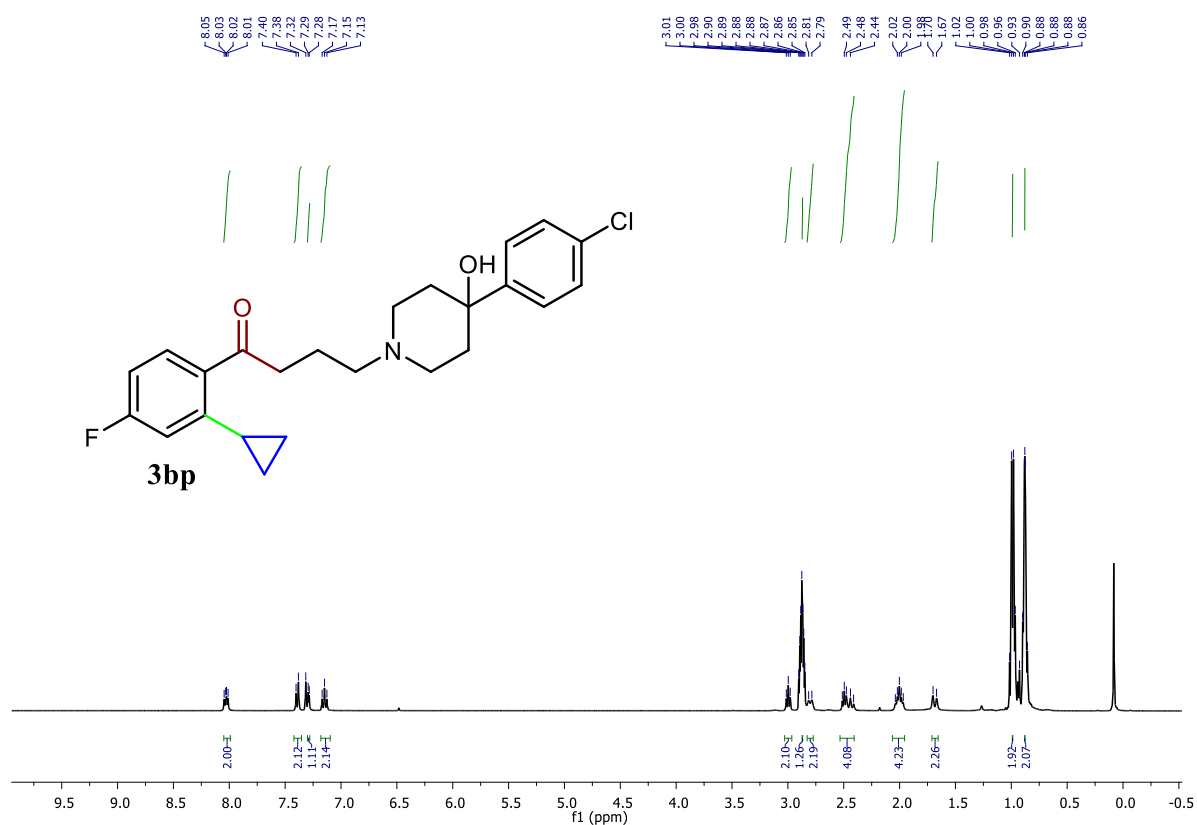

**<sup>13</sup>CNMR of 3bo (101 MHz, 512 scans, RT, CDCl<sub>3</sub>)**

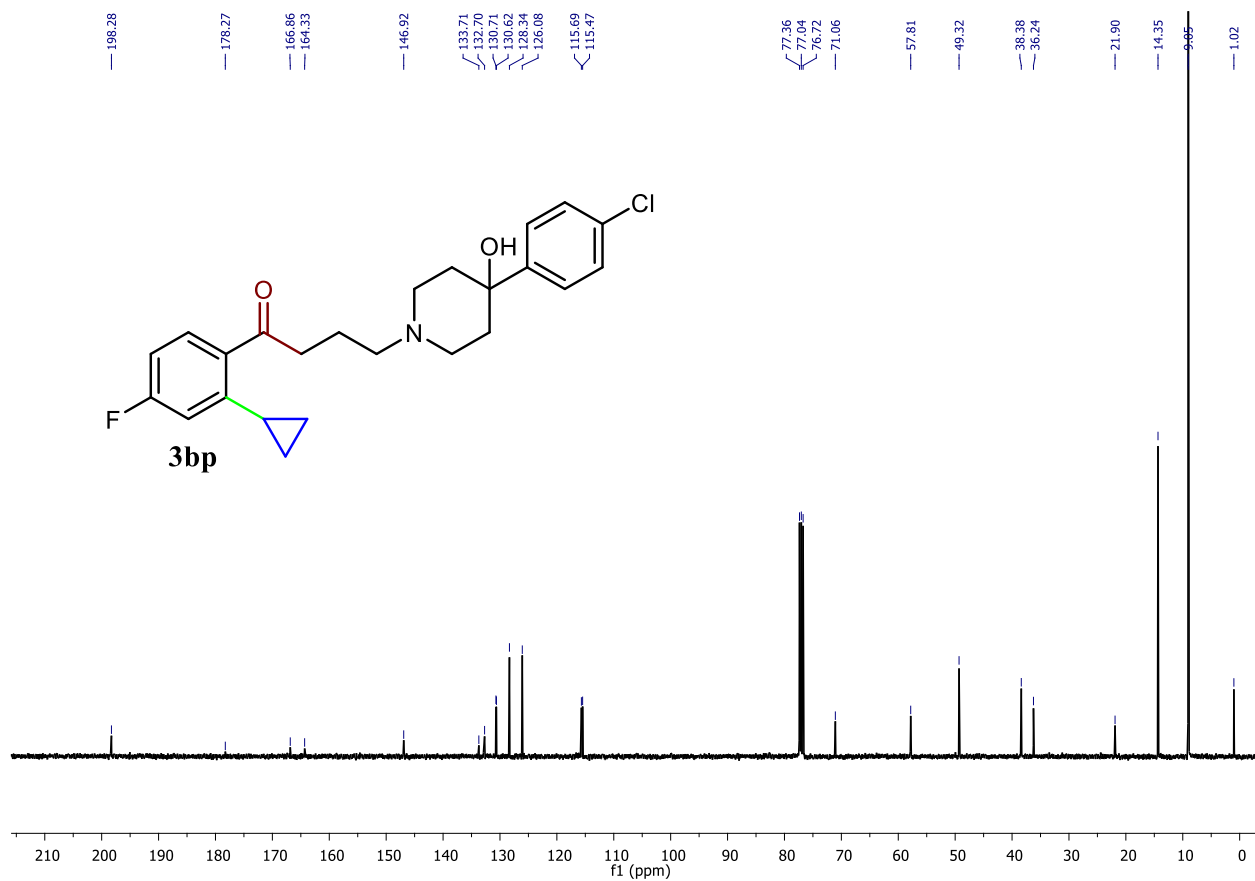

**<sup>1</sup>H NMR of 3bq (400 MHz, 32 scans, RT, CDCl<sub>3</sub>)**

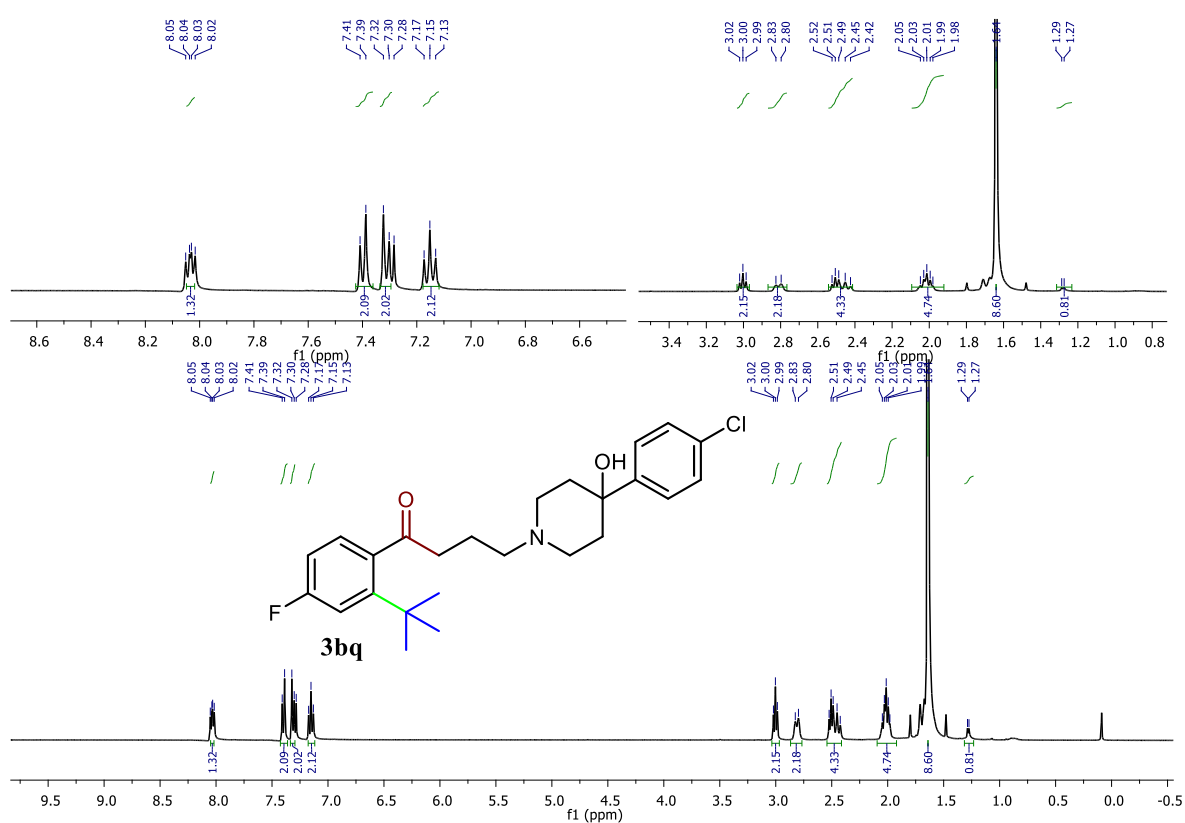

**<sup>13</sup>CNMR of 3bq (101 MHz, 512 scans, RT, CDCl<sub>3</sub>)**

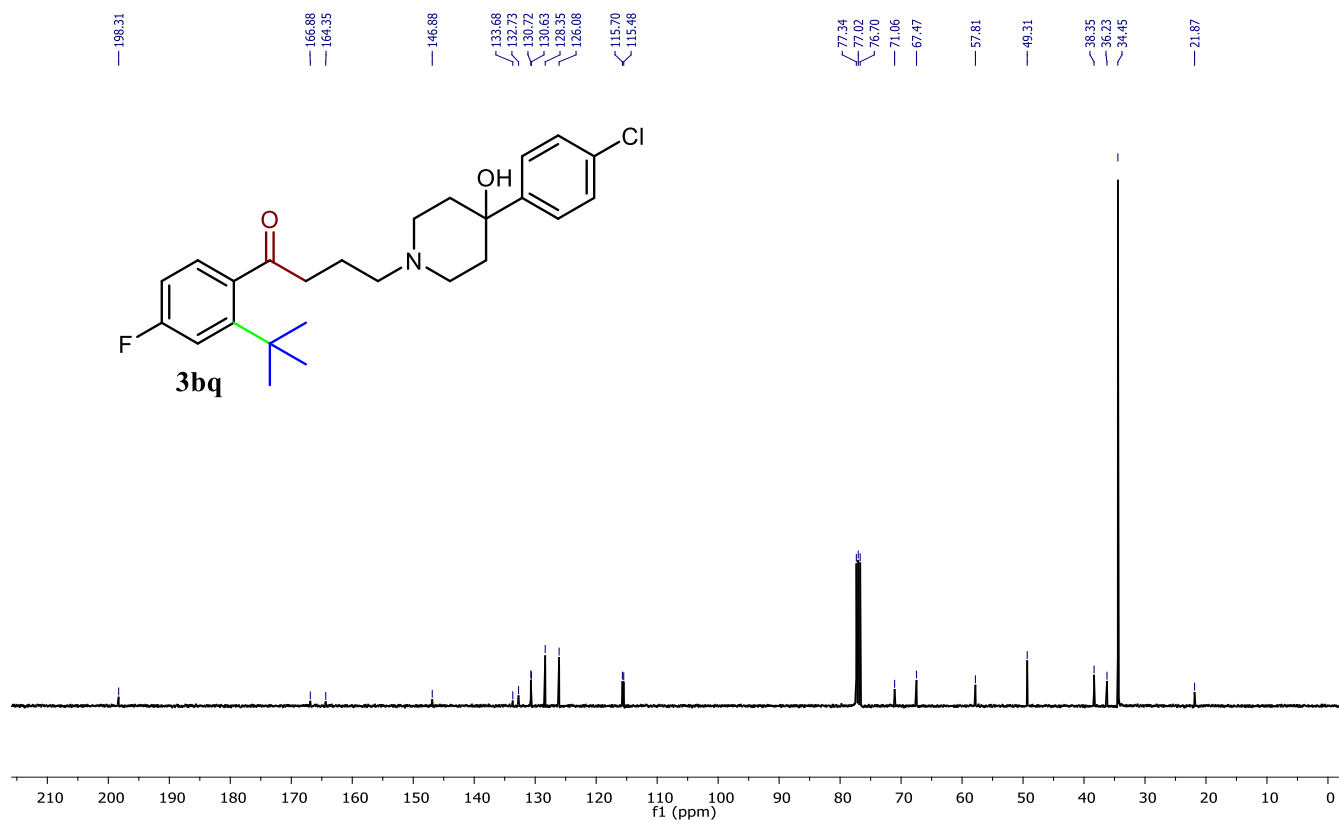



**<sup>1</sup>H NMR of 3br (400 MHz, 32 scans, RT, CDCl<sub>3</sub>)**

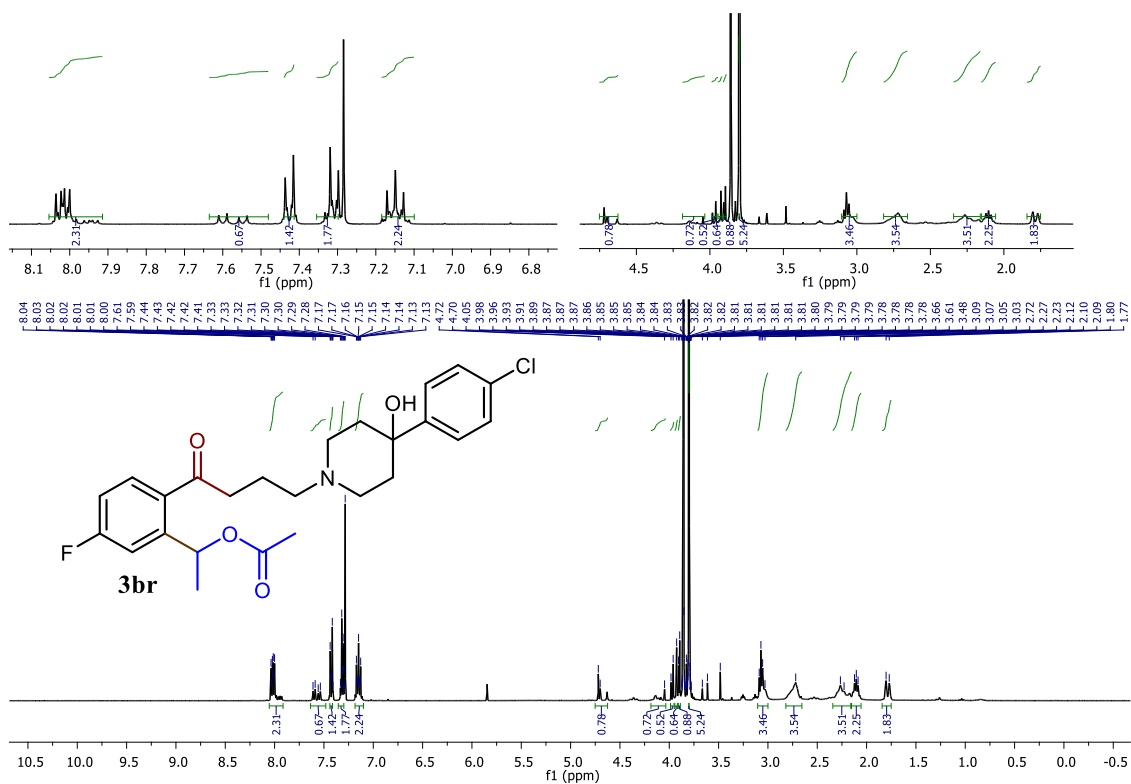

**<sup>13</sup>C NMR of 3br (101 MHz, 512 scans, RT, CDCl<sub>3</sub>)**

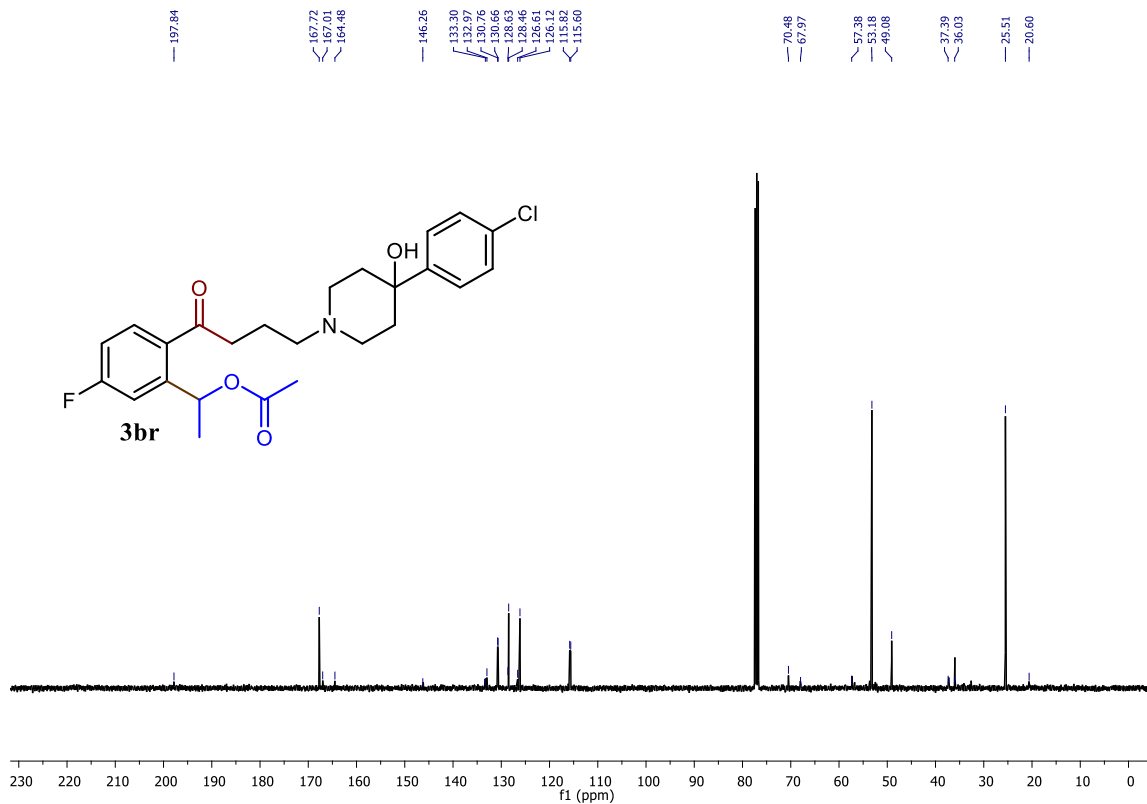

**$^1\text{H}$  NMR of 3bs (400 MHz, 32 scans, RT,  $\text{CDCl}_3$ )**

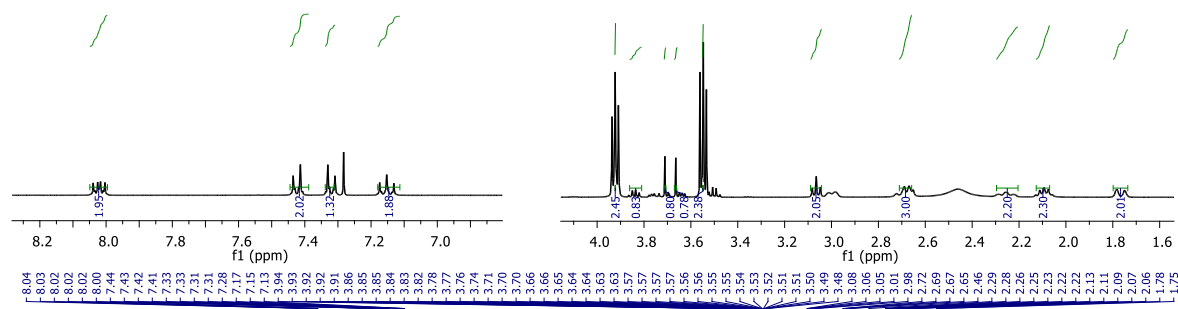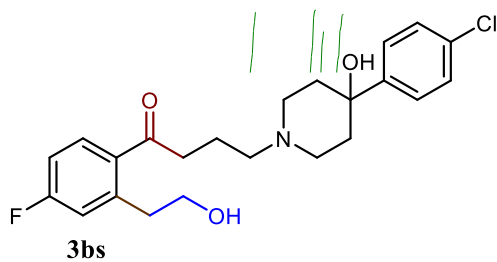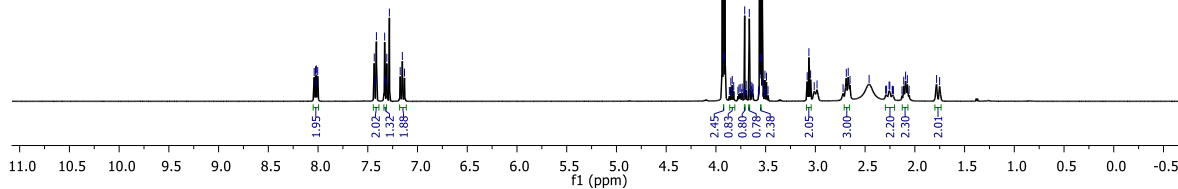

**$^{13}\text{C}$  NMR of 3bs (101 MHz, 512 scans, RT,  $\text{CDCl}_3$ )**

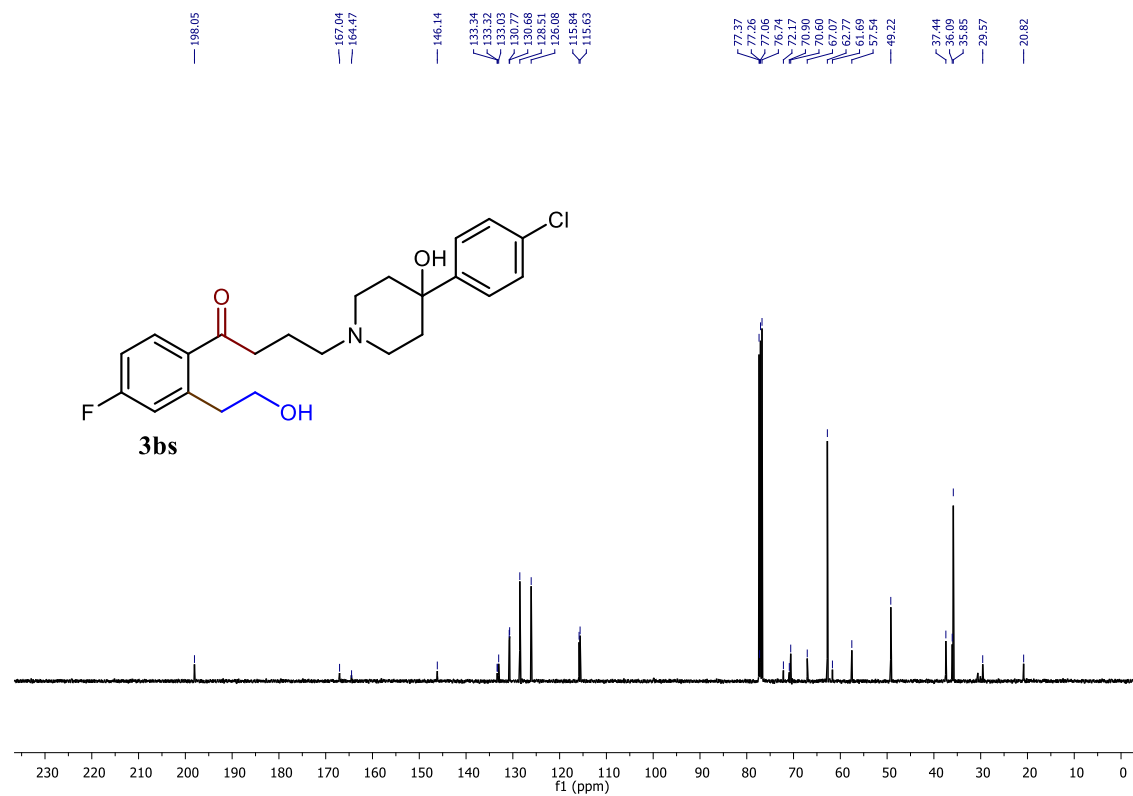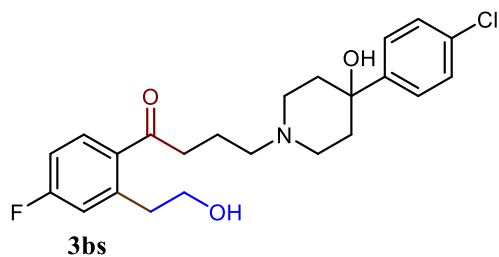

**<sup>1</sup>H NMR of 3bt (400 MHz, 32 scans, RT, CDCl<sub>3</sub>)**

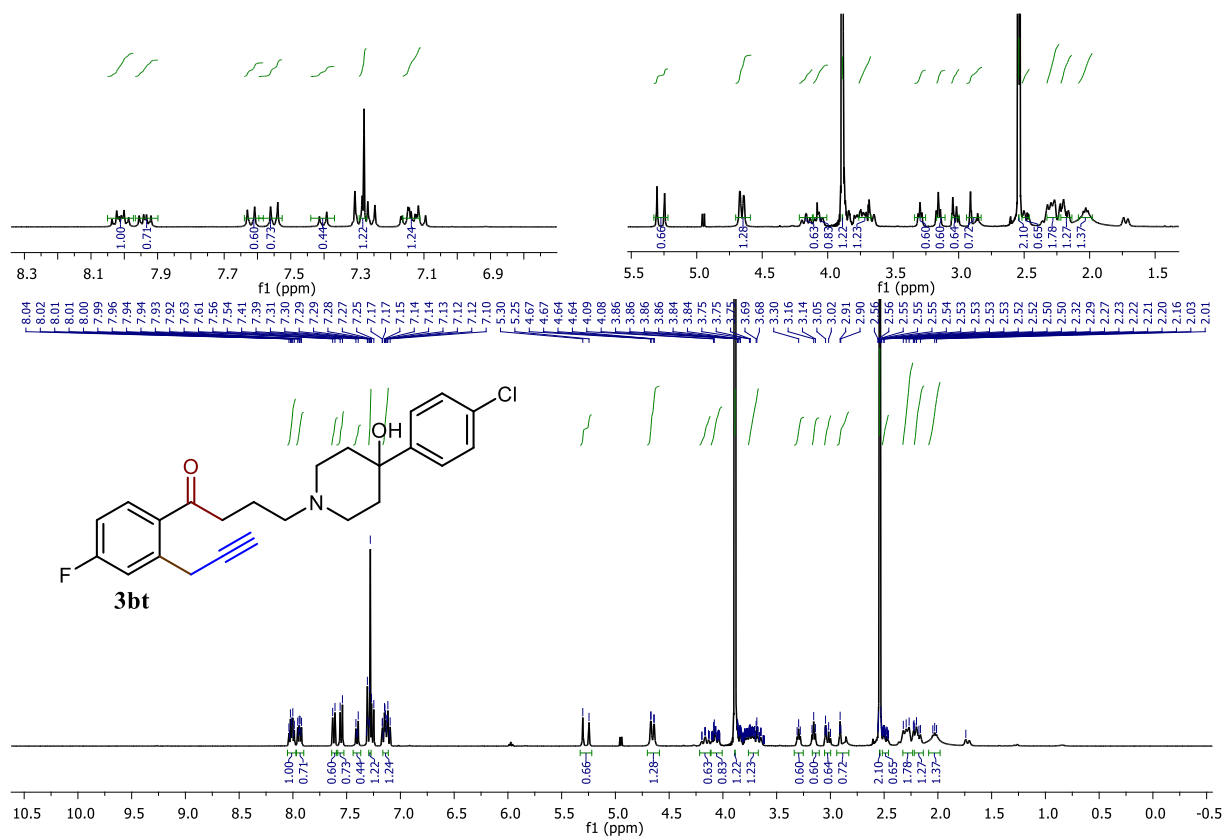

**<sup>13</sup>C NMR of 3bt (101 MHz, 512 scans, RT, CDCl<sub>3</sub>)**

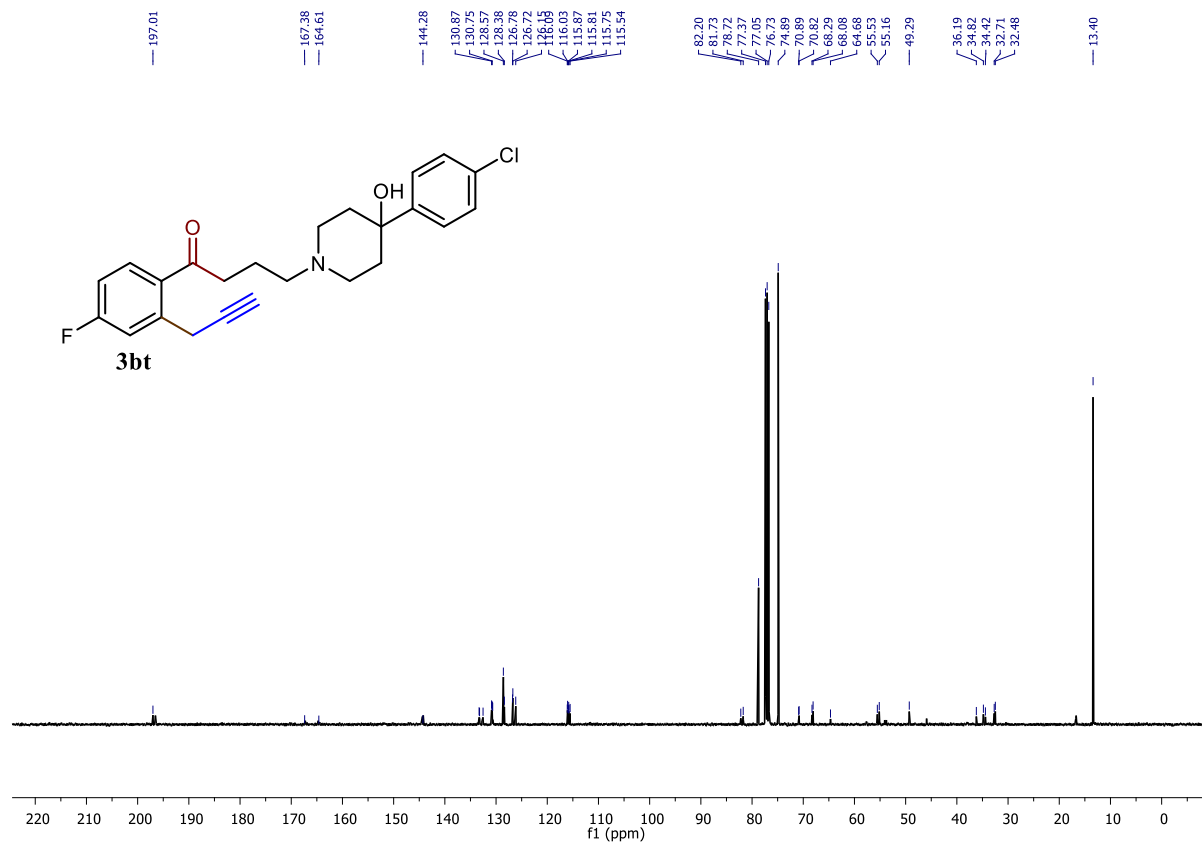

## 8. $^1\text{H}$ and $^{13}\text{C}$ NMR and $^1\text{H}$ - $^1\text{H}$ COSY Spectra of Time-dependent NMR Study

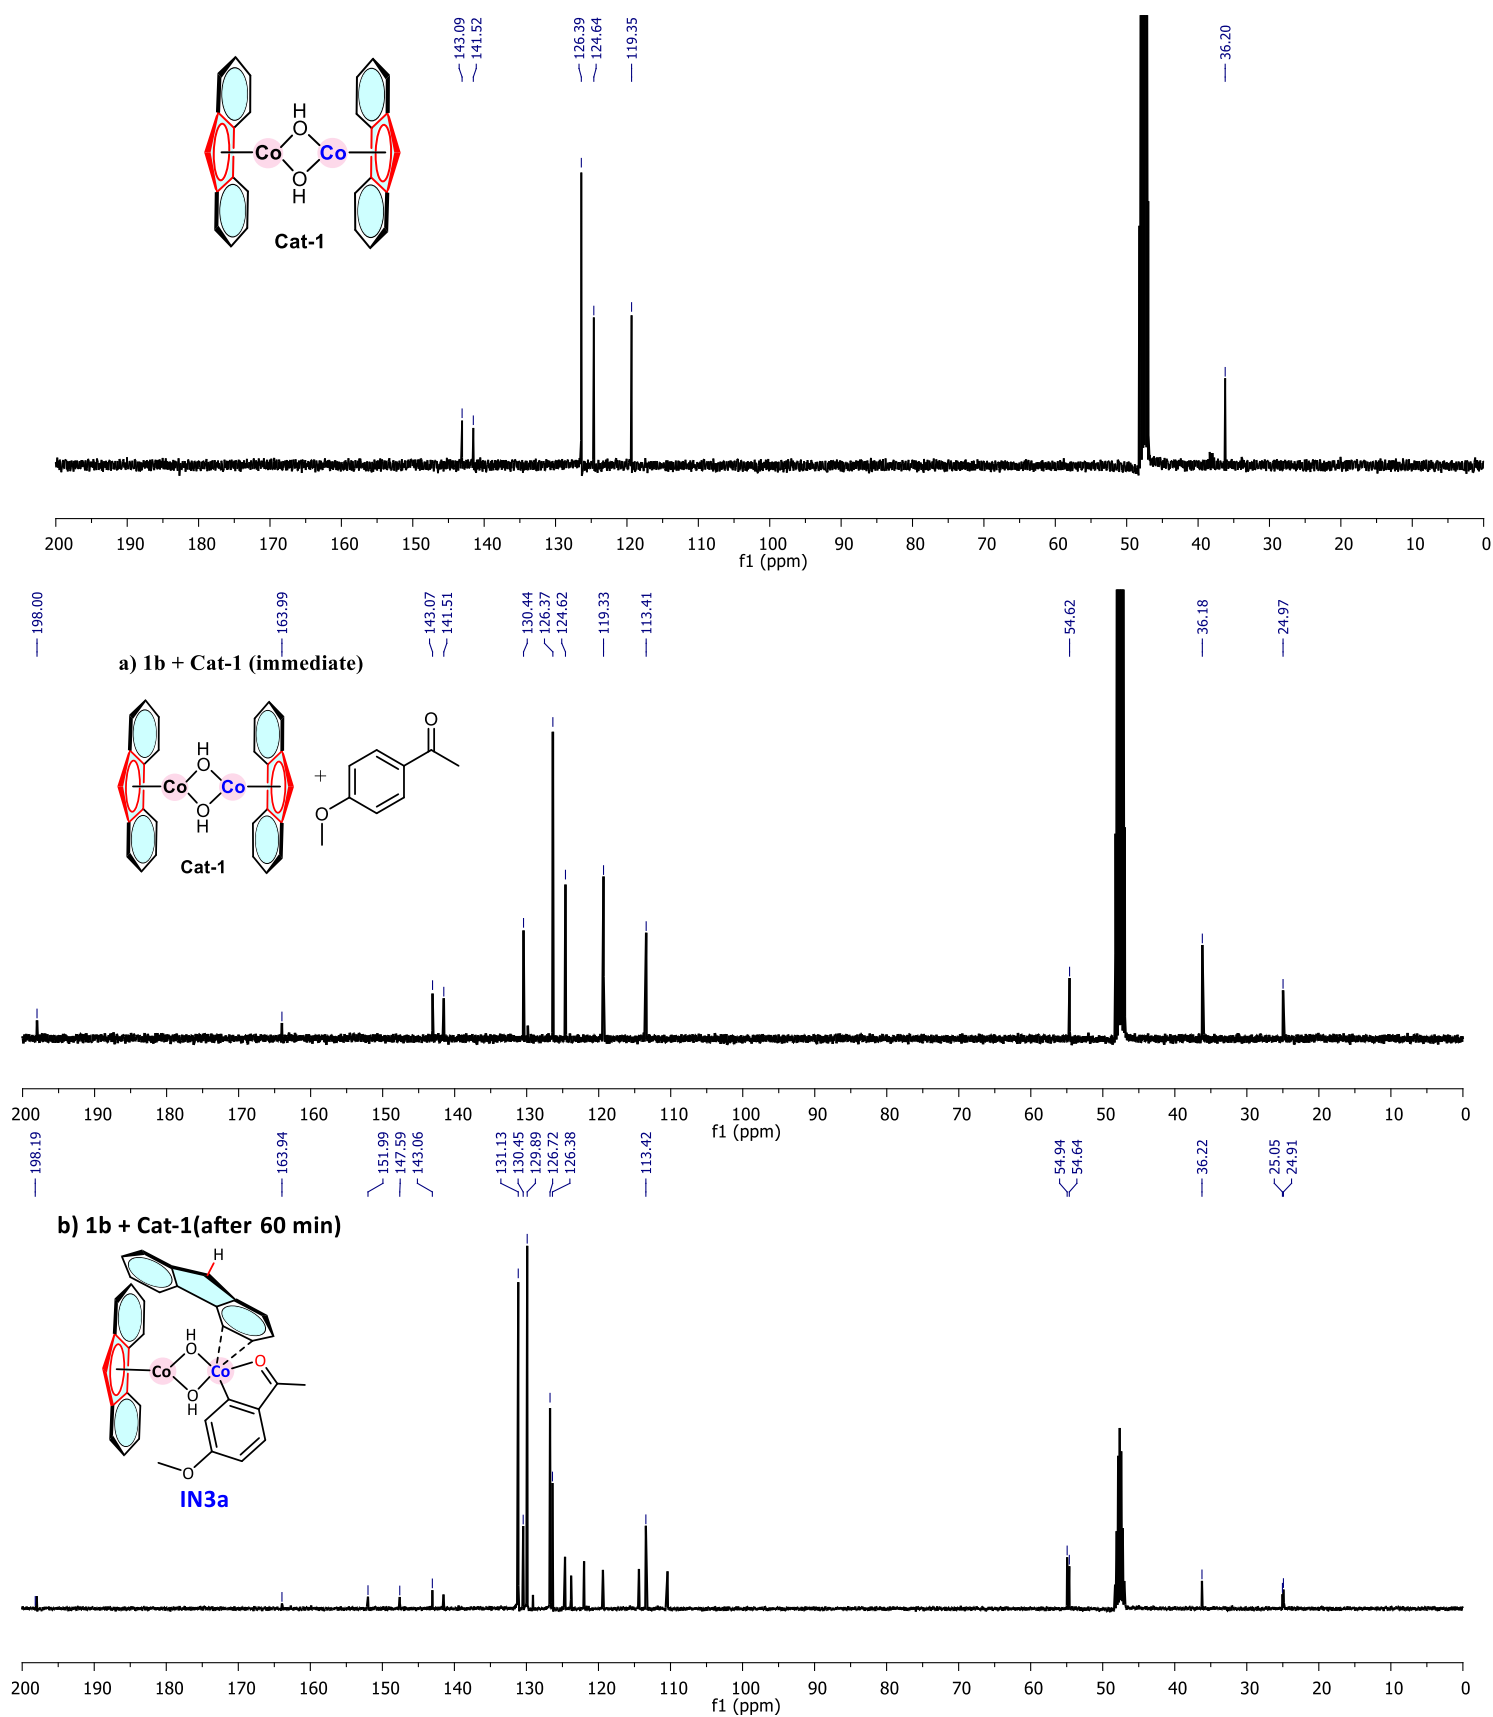

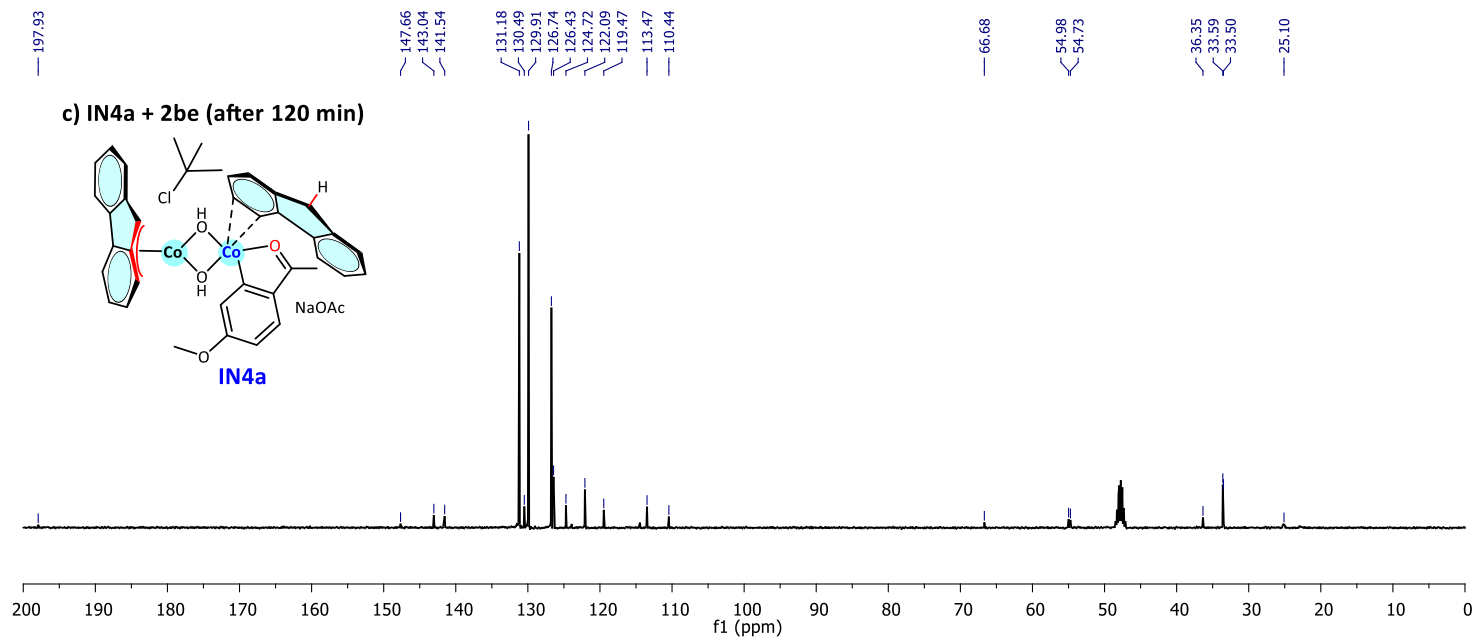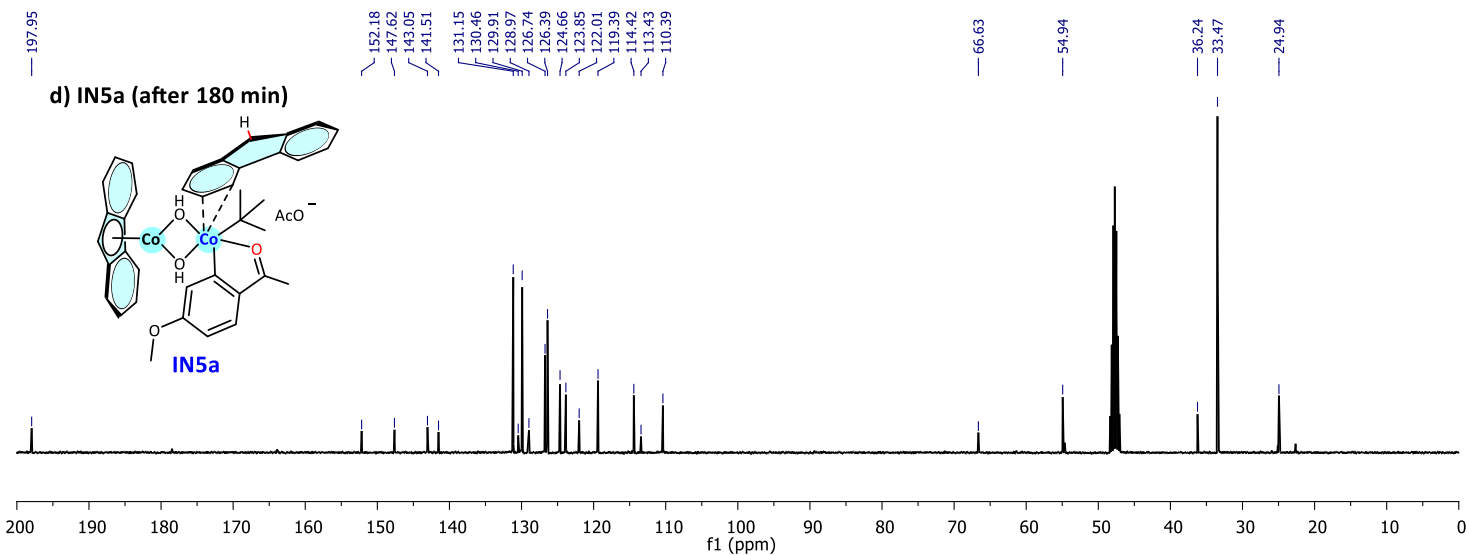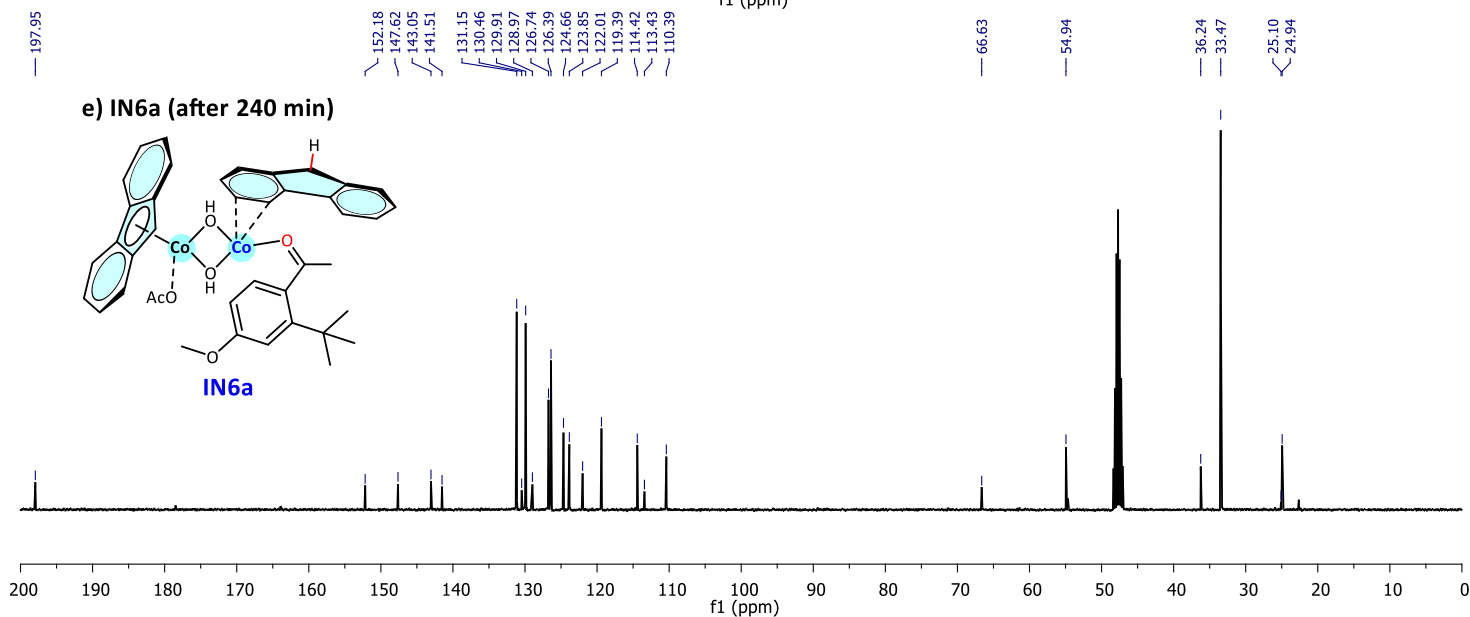

# <sup>1</sup>H NMR of the ring slippage mechanism

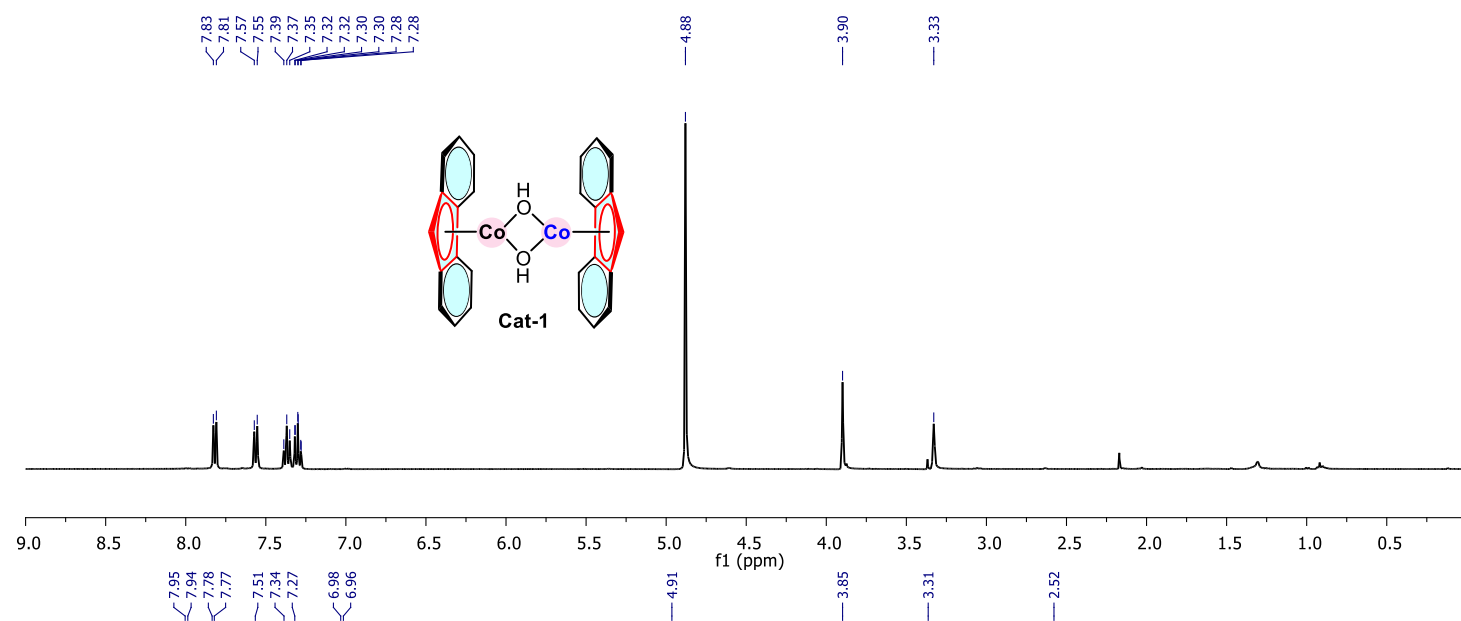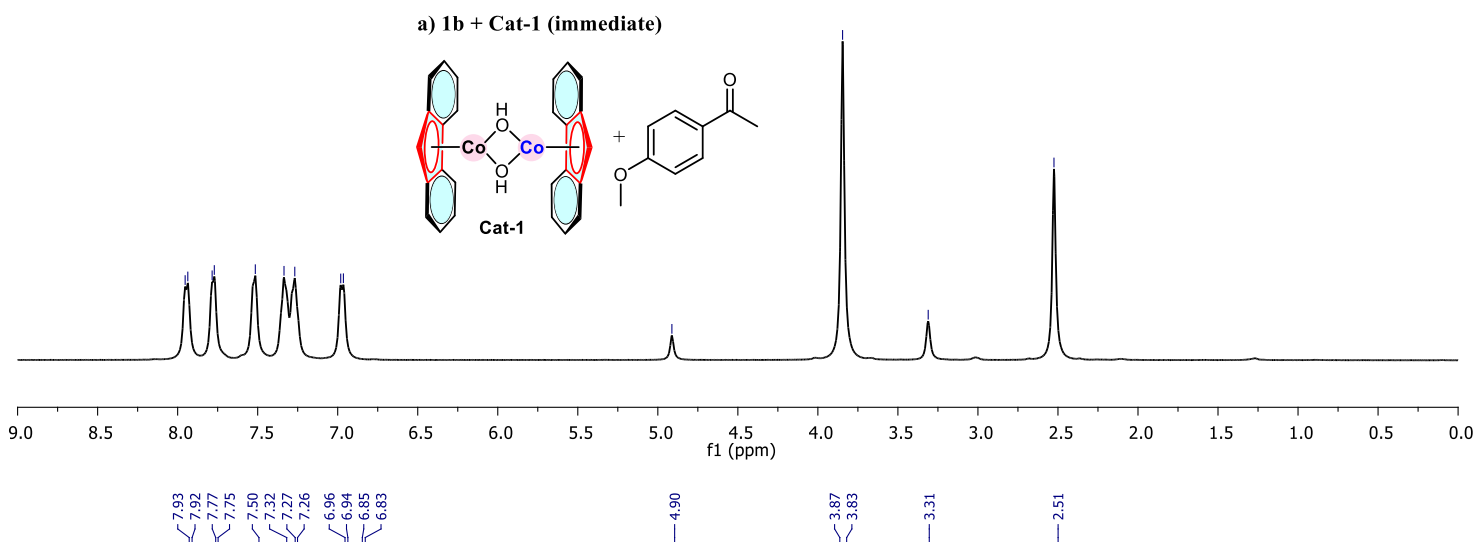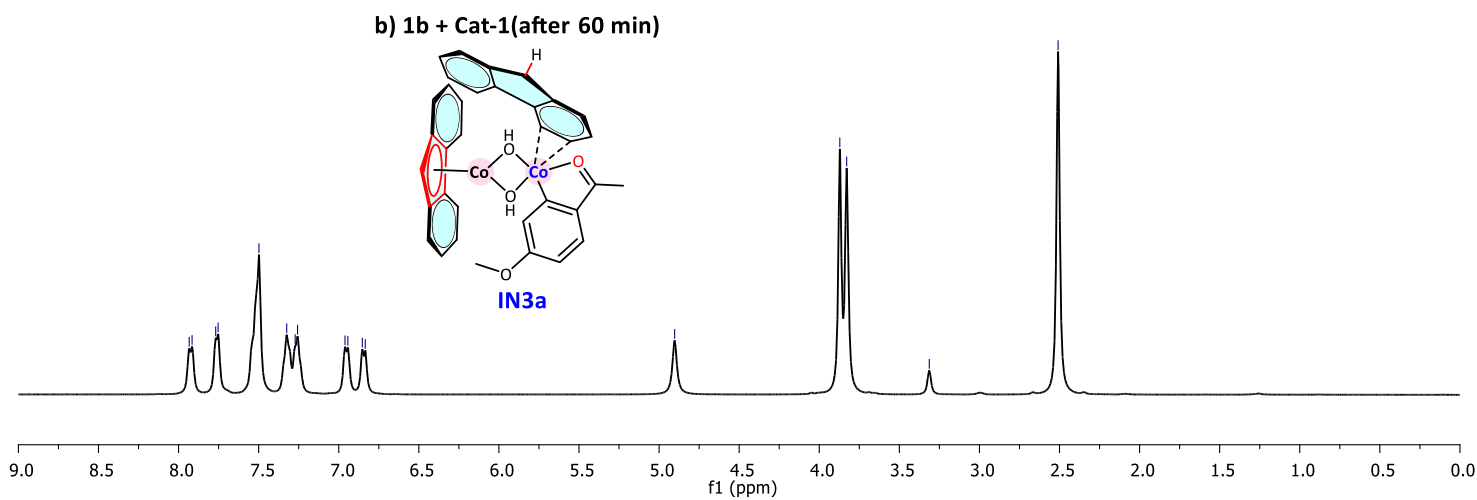

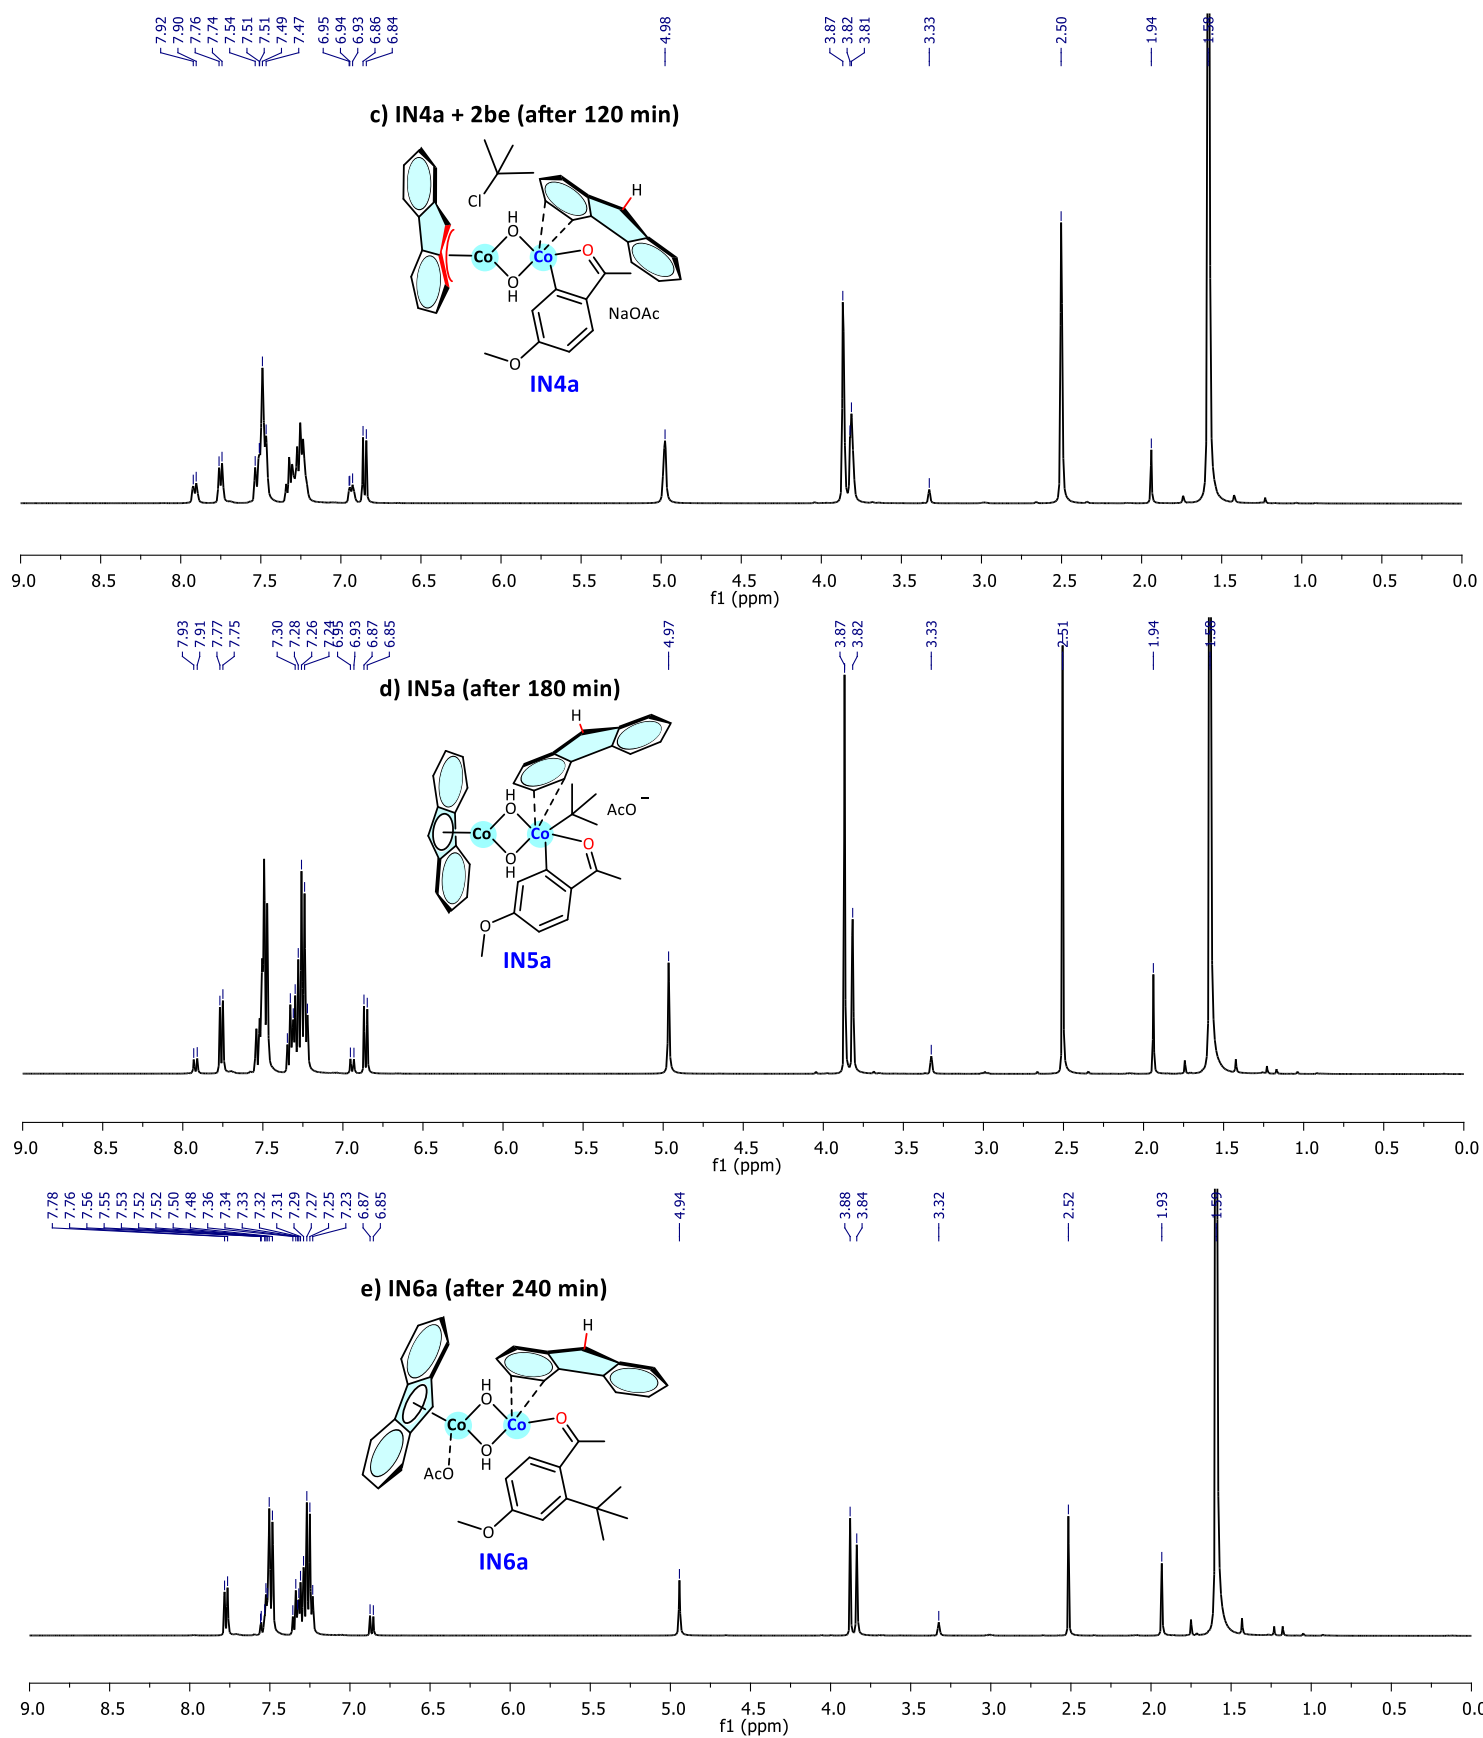

**Figure S14.** Evidence of ring slippage by time-dependent  $^{13}\text{C}$  and  $^1\text{H}$  NMR study

## 2D NMR of reaction intermediates ( $^1\text{H}$ - $^1\text{H}$ COSY)

### $^1\text{H}$ - $^1\text{H}$ COSY of IN3a

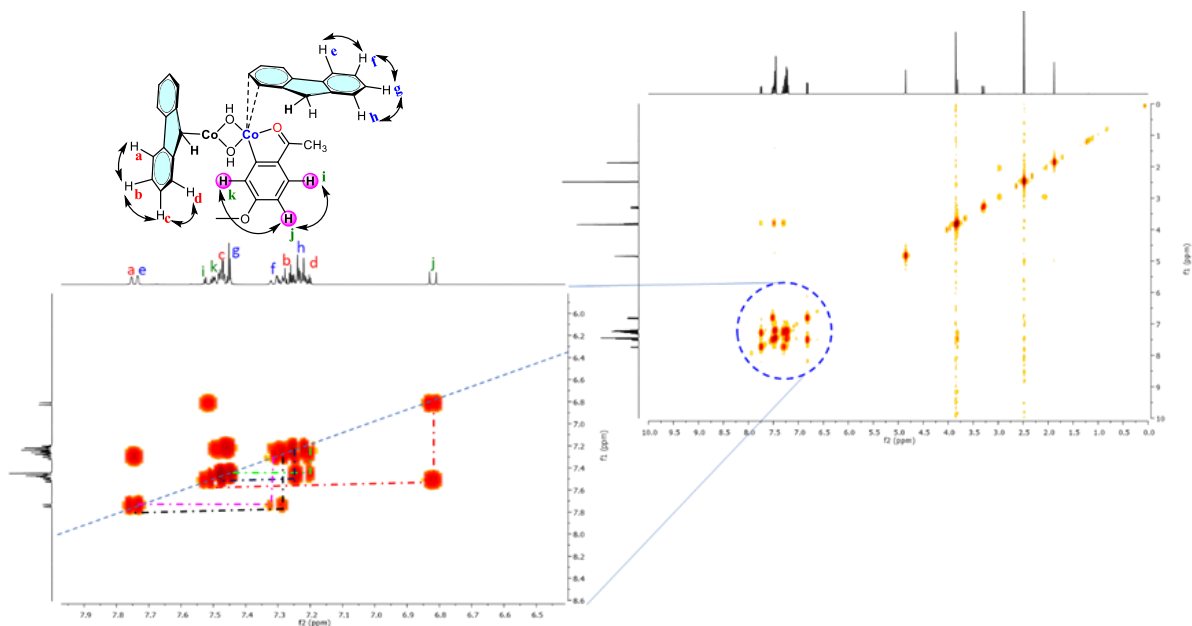

### $^1\text{H}$ - $^1\text{H}$ COSY of IN5a

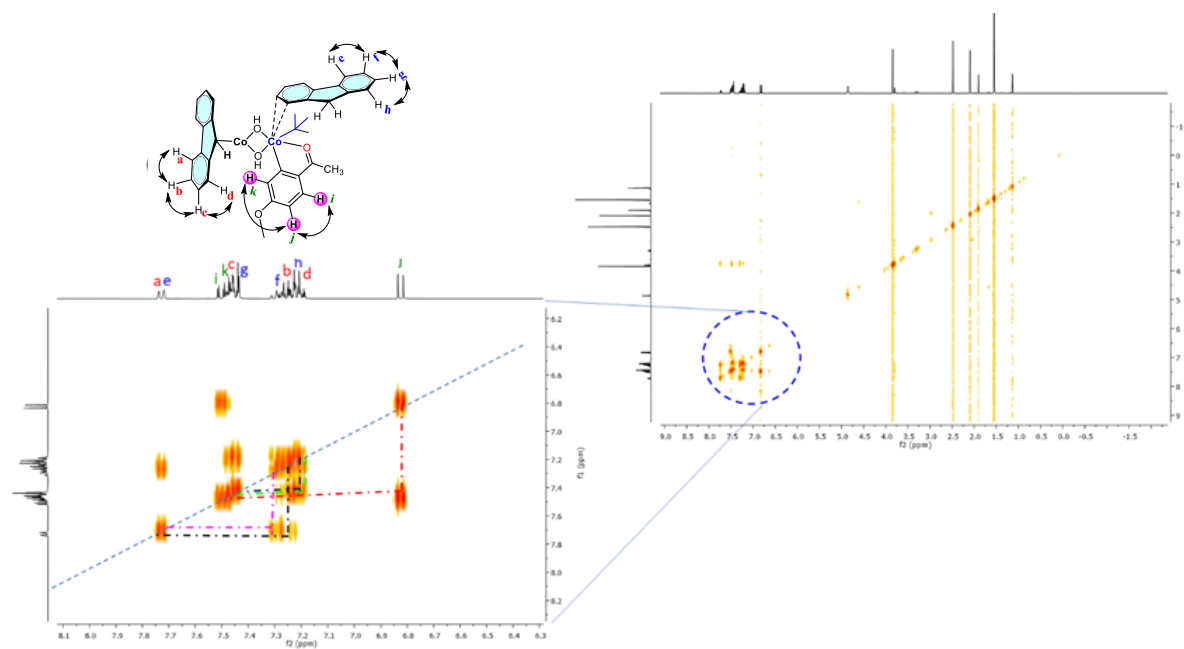



# $^1\text{H}$ - $^1\text{H}$ COSY of IN6a

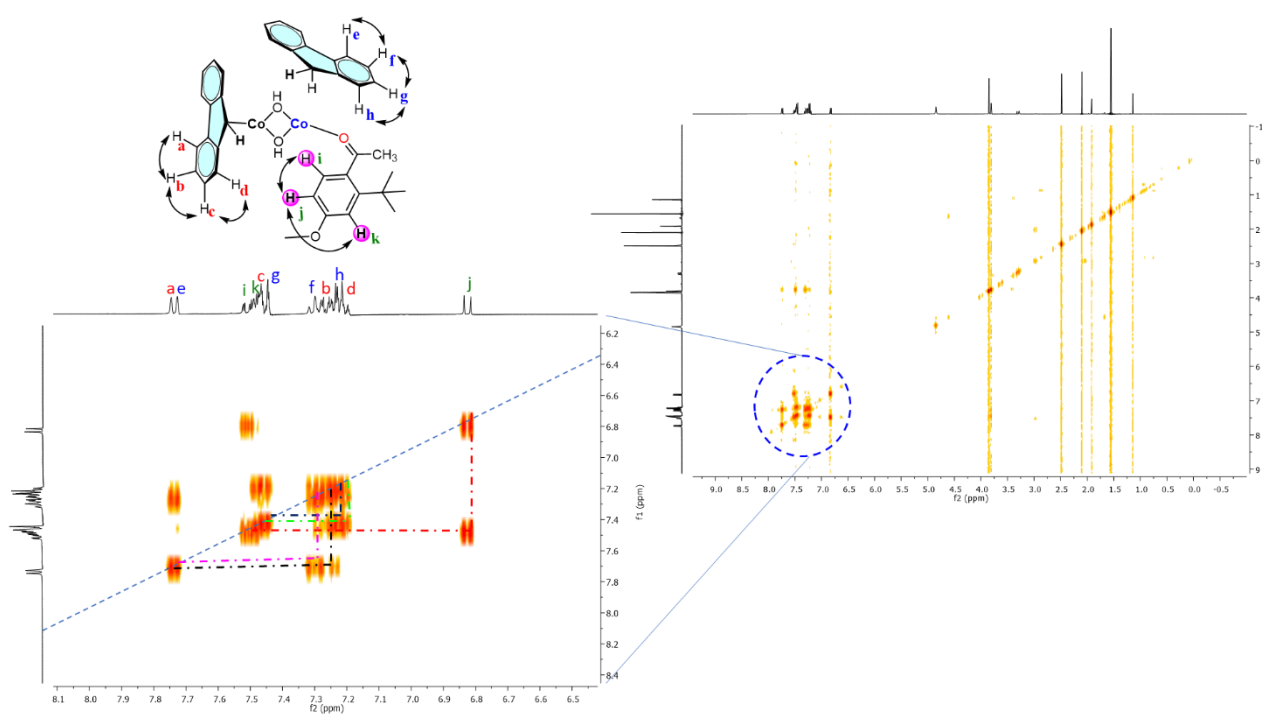

## 9. GC-MS snapshots (3a-3bq)

## Area Percent Report

Data File : CH-1.D  
 Acq On : 07 Aug 2024 14:49  
 Operator :  
 Sample : CH-1  
 Misc :  
 ALS Vial : 1 Sample Multiplier: 1

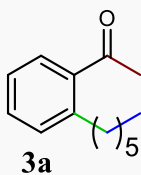

Integration Parameters: autoint1.e  
 Integrator: ChemStation

Method : C:\MassHunter\GCMS\3\methods\Method 11\_H2\_CO\_DETECTION.M  
 Title :

Signal : TIC: CH-1.D\data.ms

| peak # | R.T. min | first scan | max scan | last scan | PK TY | peak height | corr. area | corr. % max. | % of total |
|--------|----------|------------|----------|-----------|-------|-------------|------------|--------------|------------|
| 1      | 1.306    | 331        | 339      | 348       | BV    | 97412       | 1092740    | 0.51%        | 0.275%     |
| 2      | 1.386    | 361        | 439      | 378       | BV    | 99412       | 192740     | 0.41%        | 0.168%     |
| 3      | 4.826    | 451        | 549      | 598       | GV    | 81412       | 1292740    | 1.31%        | 1.275%     |
| 4      | 7.362    | 648        | 655      | 879       | VB    | 4049752     | 31174554   | 100.00%      | 97.764%    |
| 5      | 8.623    | 2231       | 2242     | 2275      | BB    | 57609       | 1094240    | 1.51%        | 1.080%     |

## Area Percent Report

Data File : CH-2.D  
 Acq On : 03 Aug 2024 15:30  
 Operator :  
 Sample : CH-2  
 Misc :  
 ALS Vial : 1 Sample Multiplier: 1

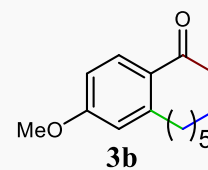

Integration Parameters: autoint1.e  
 Integrator: ChemStation

Method : C:\MassHunter\GCMS\3\methods\Method 11\_H2\_CO\_DETECTION.M  
 Title :

Signal : TIC: CH-2.D\data.ms

| peak # | R.T. min | first scan | max scan | last scan | PK TY | peak height | corr. area | corr. % max. | % of total |
|--------|----------|------------|----------|-----------|-------|-------------|------------|--------------|------------|
| 1      | 1.306    | 321        | 329      | 348       | BV    | 87412       | 1142740    | 0.41%        | 0.175%     |
| 2      | 1.376    | 351        | 429      | 378       | BV    | 89412       | 192740     | 0.21%        | 0.108%     |
| 3      | 4.826    | 541        | 769      | 798       | GV    | 91412       | 1092740    | 1.43%        | 1.353%     |
| 4      | 7.362    | 648        | 655      | 879       | VB    | 4049752     | 43174554   | 100.00%      | 98.004%    |
| 5      | 8.623    | 2231       | 2242     | 2275      | BB    | 57609       | 1294240    | 0.71%        | 0.880%     |

## Area Percent Report

Data File : CH-3.D  
 Acq On : 03 Aug 2024 12:30  
 Operator :  
 Sample : CH-3  
 Misc :  
 ALS Vial : 1 Sample Multiplier: 1

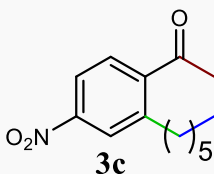

Integration Parameters: autoint1.e  
 Integrator: ChemStation

Method : C:\MassHunter\GCMS\3\methods\Method 11\_H2\_CO\_DETECTION.M  
 Title :

Signal : TIC: CH-3.D\data.ms

| peak # | R.T. min | first scan | max scan | last scan | PK TY | peak height | corr. area | corr. % max. | % of total |
|--------|----------|------------|----------|-----------|-------|-------------|------------|--------------|------------|
| 1      | 1.306    | 221        | 219      | 378       | BV    | 97412       | 142740     | 0.41%        | 0.175%     |
| 2      | 1.376    | 351        | 429      | 378       | BV    | 89412       | 192740     | 0.21%        | 0.108%     |
| 3      | 4.826    | 641        | 769      | 788       | GV    | 91412       | 118274     | 1.43%        | 1.353%     |
| 4      | 8.362    | 748        | 655      | 879       | VB    | 4049752     | 41174554   | 100.00%      | 97.110%    |
| 5      | 8.623    | 2231       | 2242     | 2275      | BB    | 57609       | 1294240    | 0.71%        | 0.880%     |

## Area Percent Report

Data File : CH-4.D  
 Acq On : 02 Aug 2024 12:43  
 Operator :  
 Sample : CH-4  
 Misc :  
 ALS Vial : 1 Sample Multiplier: 1

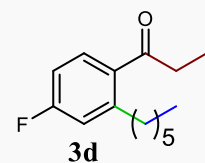

Integration Parameters: autoint1.e  
 Integrator: ChemStation

Method : C:\MassHunter\GCMS\3\methods\Method 11\_H2\_CO\_DETECTION.M  
 Title :

Signal : TIC: CH-4.D\data.ms

| peak # | R.T. min | first scan | max scan | last scan | PK TY | peak height | corr. area | corr. % max. | % of total |
|--------|----------|------------|----------|-----------|-------|-------------|------------|--------------|------------|
| 1      | 1.306    | 221        | 219      | 378       | BV    | 96712       | 202640     | 1.41%        | 1.175%     |
| 2      | 1.376    | 351        | 429      | 378       | BV    | 89412       | 202740     | 2.21%        | 2.178%     |
| 3      | 4.826    | 641        | 769      | 788       | GV    | 91412       | 118274     | 1.43%        | 1.353%     |
| 4      | 7.326    | 741        | 709      | 798       | GV    | 1191412     | 118274     | 3.73%        | 5.353%     |
| 5      | 8.662    | 748        | 655      | 879       | VB    | 4049752     | 41174554   | 100.00%      | 90.050%    |
| 6      | 8.673    | 2231       | 2242     | 2275      | BB    | 57609       | 1294240    | 0.71%        | 0.980%     |

## Area Percent Report

Data File : CH-5.D  
 Acq On : 03 Aug 2024 12:01  
 Operator :  
 Sample : CH-5  
 Misc :  
 ALS Vial : 1 Sample Multiplier: 1

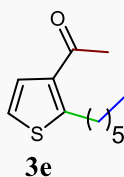

Integration Parameters: autoint1.e  
 Integrator: ChemStation

Method : C:\MassHunter\GCMS\3\methods\Method 11\_H2\_CO\_DETECTION.M  
 Title :

Signal : TIC: CH-5.D\data.ms

| peak # | R.T. min | first scan | max scan | last scan | PK TY | peak height | corr. area | corr. % max. | % of total |
|--------|----------|------------|----------|-----------|-------|-------------|------------|--------------|------------|
| 1      | 1.306    | 221        | 219      | 378       | BV    | 96712       | 202640     | 1.11%        | 1.115%     |
| 2      | 1.376    | 351        | 429      | 378       | BV    | 79412       | 232740     | 2.71%        | 3.178%     |
| 3      | 4.826    | 641        | 769      | 788       | GV    | 91412       | 118274     | 2.43%        | 2.153%     |
| 4      | 5.326    | 641        | 719      | 798       | GV    | 1291412     | 118274     | 3.73%        | 3.353%     |
| 5      | 7.662    | 748        | 655      | 879       | VB    | 4049752     | 41174554   | 100.00%      | 90.150%    |
| 6      | 8.573    | 2231       | 2242     | 2275      | BB    | 457609      | 1194240    | 0.81%        | 0.880%     |

## Area Percent Report

Data File : CH-6.D  
 Acq On : 02 Aug 2024 12:12  
 Operator :  
 Sample : CH-6  
 Misc :  
 ALS Vial : 1 Sample Multiplier: 1

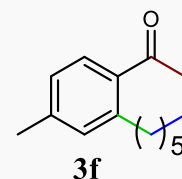

Integration Parameters: autoint1.e  
 Integrator: ChemStation

Method : C:\MassHunter\GCMS\3\methods\Method 11\_H2\_CO\_DETECTION.M  
 Title :

Signal : TIC: CH-6.D\data.ms

| peak # | R.T. min | first scan | max scan | last scan | PK TY | peak height | corr. area | corr. % max. | % of total |
|--------|----------|------------|----------|-----------|-------|-------------|------------|--------------|------------|
| 1      | 1.306    | 221        | 219      | 378       | BV    | 86712       | 202640     | 0.11%        | 0.115%     |
| 2      | 1.376    | 351        | 429      | 378       | BV    | 78412       | 222740     | 1.71%        | 2.178%     |
| 3      | 4.826    | 641        | 769      | 788       | GV    | 91412       | 118274     | 2.43%        | 2.153%     |
| 4      | 8.112    | 748        | 655      | 879       | VB    | 4149752     | 53174554   | 100.00%      | 95.750%    |
| 5      | 8.573    | 2231       | 2242     | 2275      | BB    | 497609      | 1794240    | 0.91%        | 0.980%     |

## Area Percent Report

Data File : CH-7.D  
 Acq On : 02 Aug 2024 12:20  
 Operator :  
 Sample : CH-7  
 Misc :  
 ALS Vial : 1 Sample Multiplier: 1

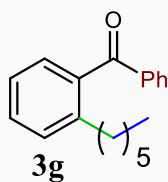

Integration Parameters: autoint1.e  
 Integrator: ChemStation

Method : C:\MassHunter\GCMS\3\methods\Method 11\_H2\_CO\_DETECTION.M  
 Title :

Signal : TIC: CH-7.D\data.ms

| peak # | R.T. min | first scan | max scan | last scan | PK TY | peak height | corr. area | corr. % max. | % of total |
|--------|----------|------------|----------|-----------|-------|-------------|------------|--------------|------------|
| 1      | 1.306    | 221        | 219      | 378       | BV    | 86712       | 202640     | 0.11%        | 0.115%     |
| 2      | 1.376    | 351        | 429      | 378       | BV    | 78412       | 222740     | 1.71%        | 2.178%     |
| 3      | 4.826    | 641        | 769      | 788       | GV    | 91412       | 118274     | 2.43%        | 2.153%     |
| 4      | 8.673    | 2231       | 2242     | 2275      | BB    | 497609      | 1794240    | 0.91%        | 0.780%     |
| 5      | 10.112   | 748        | 655      | 879       | VB    | 4349752     | 55574554   | 100.00%      | 95.050%    |

## Area Percent Report

Data File : CH-8.D  
 Acq On : 02 Aug 2024 10:12  
 Operator :  
 Sample : CH-8  
 Misc :  
 ALS Vial : 1 Sample Multiplier: 1

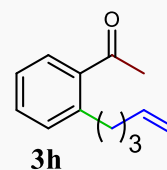

Integration Parameters: autoint1.e  
 Integrator: ChemStation

Method : C:\MassHunter\GCMS\3\methods\Method 11\_H2\_CO\_DETECTION.M  
 Title :

Signal : TIC: CH-8.D\data.ms

| peak # | R.T. min | first scan | max scan | last scan | PK TY | peak height | corr. area | corr. % max. | % of total |
|--------|----------|------------|----------|-----------|-------|-------------|------------|--------------|------------|
| 1      | 1.306    | 221        | 219      | 378       | BV    | 86712       | 202640     | 1.11%        | 1.115%     |
| 2      | 1.376    | 351        | 429      | 378       | BV    | 78412       | 222740     | 1.71%        | 1.178%     |
| 3      | 5.826    | 741        | 769      | 788       | GV    | 91412       | 118274     | 2.43%        | 2.153%     |
| 4      | 6.776    | 751        | 769      | 788       | GV    | 91412       | 118274     | 2.43%        | 5.153%     |
| 5      | 8.112    | 788        | 655      | 879       | VB    | 4149752     | 53174554   | 100.00%      | 90.010%    |
| 6      | 8.573    | 2231       | 2242     | 2275      | BB    | 497609      | 1794240    | 0.91%        | 0.980%     |

## Area Percent Report

Data File : CH-9.D  
 Acq On : 02 Aug 2024 11:09  
 Operator :  
 Sample : CH-9  
 Misc :  
 ALS Vial : 1 Sample Multiplier: 1

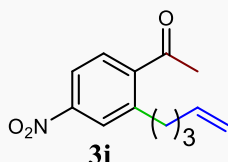

Integration Parameters: autoint1.e  
 Integrator: ChemStation

Method : C:\MassHunter\GCMS\3\methods\Method 11\_H2\_CO\_DETECTION.M  
 Title :

Signal : TIC: CH-9.D\data.ms

| peak # | R.T. min | first scan | max scan | last scan | PK TY | peak height | corr. area | corr. % max. | % of total |
|--------|----------|------------|----------|-----------|-------|-------------|------------|--------------|------------|
| 1      | 1.306    | 221        | 219      | 378       | BV    | 86712       | 202640     | 2.11%        | 2.115%     |
| 2      | 1.376    | 351        | 429      | 378       | BV    | 78412       | 222740     | 2.71%        | 2.178%     |
| 3      | 5.826    | 741        | 769      | 788       | GV    | 91412       | 118274     | 2.43%        | 2.153%     |
| 4      | 7.776    | 751        | 769      | 788       | GV    | 91412       | 118274     | 2.43%        | 5.153%     |
| 5      | 8.332    | 788        | 655      | 879       | VB    | 4249752     | 43174554   | 100.00%      | 88.001%    |
| 6      | 8.573    | 2231       | 2242     | 2275      | BB    | 497609      | 1794240    | 0.91%        | 0.980%     |

## Area Percent Report

Data File : CH-10.D  
 Acq On : 02 Aug 2024 11:20  
 Operator :  
 Sample : CH-10  
 Misc :  
 ALS Vial : 1 Sample Multiplier: 1

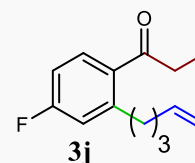

Integration Parameters: autoint1.e  
 Integrator: ChemStation

Method : C:\MassHunter\GCMS\3\methods\Method 11\_H2\_CO\_DETECTION.M  
 Title :

Signal : TIC: CH-10.D\data.ms

| peak # | R.T. min | first scan | max scan | last scan | PK TY | peak height | corr. area | corr. % max. | % of total |
|--------|----------|------------|----------|-----------|-------|-------------|------------|--------------|------------|
| 1      | 1.306    | 221        | 219      | 378       | BV    | 86712       | 202640     | 2.11%        | 2.115%     |
| 2      | 1.376    | 351        | 429      | 378       | BV    | 78412       | 222740     | 2.71%        | 2.178%     |
| 3      | 5.826    | 741        | 769      | 788       | GV    | 91412       | 118274     | 2.73%        | 3.153%     |
| 4      | 7.132    | 888        | 855      | 879       | VB    | 4249752     | 43174554   | 100.00%      | 92.001%    |
| 5      | 8.673    | 2231       | 2242     | 2275      | BB    | 497609      | 1794240    | 0.91%        | 0.980%     |

## Area Percent Report

Data File : CH-11.D  
 Acq On : 03 Aug 2024 11:10  
 Operator :  
 Sample : CH-11  
 Misc :  
 ALS Vial : 1 Sample Multiplier: 1

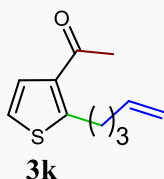

Integration Parameters: autoint1.e  
 Integrator: ChemStation

Method : C:\MassHunter\GCMS\3\methods\Method 11\_H2\_CO\_DETECTION.M  
 Title :

Signal : TIC: CH-11.D\data.ms

| peak # | R.T. min | first scan | max scan | last scan | PK TY | peak height | corr. area | corr. % max. | % of total |
|--------|----------|------------|----------|-----------|-------|-------------|------------|--------------|------------|
| 1      | 1.306    | 221        | 219      | 378       | BV    | 86712       | 202640     | 2.11%        | 2.115%     |
| 2      | 1.376    | 351        | 429      | 378       | BV    | 78412       | 222740     | 2.71%        | 2.178%     |
| 3      | 5.826    | 741        | 769      | 788       | GV    | 91412       | 118274     | 3.73%        | 5.153%     |
| 4      | 6.332    | 888        | 855      | 879       | VB    | 4249752     | 43174554   | 100.00%      | 90.001%    |
| 5      | 8.673    | 2231       | 2242     | 2275      | BB    | 497609      | 1794240    | 1.81%        | 1.020%     |

## Area Percent Report

Data File : CH-12.D  
 Acq On : 03 Aug 2024 12:03  
 Operator :  
 Sample : CH-12  
 Misc :  
 ALS Vial : 1 Sample Multiplier: 1

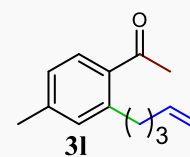

Integration Parameters: autoint1.e  
 Integrator: ChemStation

Method : C:\MassHunter\GCMS\3\methods\Method 11\_H2\_CO\_DETECTION.M  
 Title :

Signal : TIC: CH-12.D\data.ms

| peak # | R.T. min | first scan | max scan | last scan | PK TY | peak height | corr. area | corr. % max. | % of total |
|--------|----------|------------|----------|-----------|-------|-------------|------------|--------------|------------|
| 1      | 1.306    | 221        | 219      | 378       | BV    | 87712       | 212640     | 1.11%        | 1.115%     |
| 2      | 1.376    | 351        | 429      | 378       | BV    | 78412       | 222740     | 2.71%        | 2.178%     |
| 3      | 5.826    | 741        | 769      | 788       | GV    | 91412       | 118274     | 1.73%        | 1.153%     |
| 4      | 8.332    | 888        | 855      | 879       | VB    | 4249752     | 43174554   | 100.00%      | 95.131%    |
| 5      | 8.673    | 2231       | 2242     | 2275      | BB    | 497609      | 1794240    | 1.81%        | 1.020%     |

## Area Percent Report

Data File : CH-13.D  
 Acq On : 02 Aug 2024 10:13  
 Operator :  
 Sample : CH-13  
 Misc :  
 ALS Vial : 1 Sample Multiplier: 1

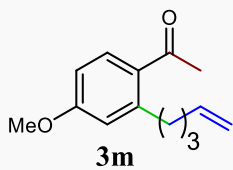

Integration Parameters: autoint1.e  
 Integrator: ChemStation

Method : C:\MassHunter\GCMS\3\methods\Method 11\_H2\_CO\_DETECTION.M  
 Title :

Signal : TIC: CH-13.D\data.ms

| peak # | R.T. min | first scan | max scan | last scan | PK TY | peak height | corr. area | corr. % max. | % of total |
|--------|----------|------------|----------|-----------|-------|-------------|------------|--------------|------------|
| 1      | 1.306    | 221        | 219      | 378       | BV    | 87712       | 212640     | 1.11%        | 1.115%     |
| 2      | 1.376    | 351        | 429      | 378       | BV    | 78412       | 222740     | 2.71%        | 1.118%     |
| 3      | 5.826    | 741        | 769      | 788       | GV    | 91412       | 118274     | 1.73%        | 1.153%     |
| 4      | 7.632    | 888        | 855      | 879       | VB    | 4249752     | 43174554   | 100.00%      | 95.703%    |
| 5      | 8.473    | 2231       | 2242     | 2275      | BB    | 497609      | 1794240    | 1.81%        | 1.020%     |

## Area Percent Report

Data File : CH-14.D  
 Acq On : 05 Aug 2024 11:11  
 Operator :  
 Sample : CH-14  
 Misc :  
 ALS Vial : 1 Sample Multiplier: 1

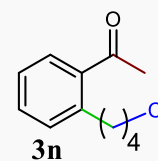

Integration Parameters: autoint1.e  
 Integrator: ChemStation

Method : C:\MassHunter\GCMS\3\methods\Method 11\_H2\_CO\_DETECTION.M  
 Title :

Signal : TIC: CH-14.D\data.ms

| peak # | R.T. min | first scan | max scan | last scan | PK TY | peak height | corr. area | corr. % max. | % of total |
|--------|----------|------------|----------|-----------|-------|-------------|------------|--------------|------------|
| 1      | 1.306    | 221        | 219      | 378       | BV    | 87712       | 212640     | 0.11%        | 0.015%     |
| 2      | 1.376    | 351        | 429      | 378       | BV    | 78412       | 222740     | 2.71%        | 0.218%     |
| 3      | 5.826    | 741        | 769      | 788       | GV    | 91412       | 118274     | 1.73%        | 1.153%     |
| 4      | 8.312    | 788        | 855      | 879       | VB    | 4249752     | 43174554   | 100.00%      | 98.103%    |
| 5      | 8.473    | 2231       | 2242     | 2275      | BB    | 497609      | 1794240    | 1.81%        | 0.820%     |

## Area Percent Report

Data File : CH-15.D  
 Acq On : 04 Aug 2024 10:01  
 Operator :  
 Sample : CH-15  
 Misc :  
 ALS Vial : 1 Sample Multiplier: 1

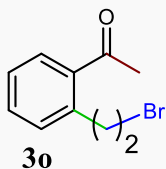

Integration Parameters: autoint1.e  
 Integrator: ChemStation

Method : C:\MassHunter\GCMS\3\methods\Method 11\_H2\_CO\_DETECTION.M  
 Title :

Signal : TIC: CH-15.D\data.ms

| peak # | R.T. min | first scan | max scan | last scan | PK TY | peak height | corr. area | corr. % max. | % of total |
|--------|----------|------------|----------|-----------|-------|-------------|------------|--------------|------------|
| 1      | 1.306    | 221        | 219      | 378       | BV    | 87712       | 212640     | 0.11%        | 0.215%     |
| 2      | 1.376    | 351        | 429      | 378       | BV    | 78412       | 222740     | 2.71%        | 0.118%     |
| 3      | 7.826    | 741        | 769      | 788       | GV    | 91412       | 118274     | 1.03%        | 1.053%     |
| 4      | 8.312    | 788        | 855      | 879       | VB    | 4249752     | 43174554   | 100.00%      | 98.103%    |
| 5      | 8.473    | 2231       | 2242     | 2275      | BB    | 497609      | 1794240    | 1.81%        | 0.820%     |

## Area Percent Report

Data File : CH-15.D  
 Acq On : 04 Aug 2024 10:01  
 Operator :  
 Sample : CH-15  
 Misc :  
 ALS Vial : 1 Sample Multiplier: 1

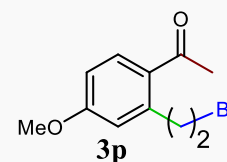

Integration Parameters: autoint1.e  
 Integrator: ChemStation

Method : C:\MassHunter\GCMS\3\methods\Method 11\_H2\_CO\_DETECTION.M  
 Title :

Signal : TIC: CH-15.D\data.ms

| peak # | R.T. min | first scan | max scan | last scan | PK TY | peak height | corr. area | corr. % max. | % of total |
|--------|----------|------------|----------|-----------|-------|-------------|------------|--------------|------------|
| 1      | 1.306    | 221        | 219      | 378       | BV    | 87712       | 212640     | 0.011%       | 0.115%     |
| 2      | 1.376    | 351        | 429      | 378       | BV    | 78412       | 222740     | 1.71%        | 1.118%     |
| 3      | 7.826    | 741        | 769      | 788       | GV    | 91412       | 118274     | 1.03%        | 1.053%     |
| 4      | 8.112    | 778        | 855      | 879       | VB    | 4249752     | 43174554   | 100.00%      | 97.103%    |
| 5      | 8.674    | 2231       | 2242     | 2275      | BB    | 4497609     | 1894240    | 1.81%        | 0.720%     |

## Area Percent Report

Data File : CH-18.D  
 Acq On : 07 Aug 2024 11:01  
 Operator :  
 Sample : CH-18  
 Misc :  
 ALS Vial : 1 Sample Multiplier: 1

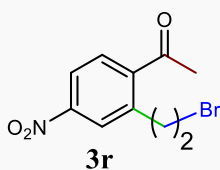

Integration Parameters: autoint1.e  
 Integrator: ChemStation

Method : C:\MassHunter\GCMS\3\methods\Method 11\_H2\_CO\_DETECTION.M  
 Title :

Signal : TIC: CH-18.D\data.ms

| peak # | R.T. min | first scan | max scan | last scan | PK TY | peak height | corr. area | corr. % max. | % of total |
|--------|----------|------------|----------|-----------|-------|-------------|------------|--------------|------------|
| 1      | 1.306    | 221        | 219      | 378       | BV    | 87712       | 212640     | 0.011%       | 2.115%     |
| 2      | 1.376    | 351        | 429      | 378       | BV    | 78412       | 222740     | 2.71%        | 3.118%     |
| 3      | 7.826    | 741        | 769      | 788       | GV    | 91412       | 118274     | 1.03%        | 2.053%     |
| 4      | 7.912    | 878        | 875      | 879       | VB    | 4249752     | 43174554   | 100.00%      | 92.103%    |
| 5      | 8.674    | 2231       | 2242     | 2275      | BB    | 4497609     | 1894240    | 1.81%        | 1.020%     |

## Area Percent Report

Data File : CH-19.D  
 Acq On : 05 Aug 2024 12:00  
 Operator :  
 Sample : CH-19  
 Misc :  
 ALS Vial : 1 Sample Multiplier: 1

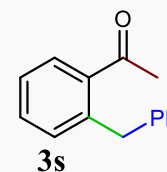

Integration Parameters: autoint1.e  
 Integrator: ChemStation

Method : C:\MassHunter\GCMS\3\methods\Method 11\_H2\_CO\_DETECTION.M  
 Title :

Signal : TIC: CH-19.D\data.ms

| peak # | R.T. min | first scan | max scan | last scan | PK TY | peak height | corr. area | corr. % max. | % of total |
|--------|----------|------------|----------|-----------|-------|-------------|------------|--------------|------------|
| 1      | 1.306    | 221        | 219      | 378       | BV    | 87712       | 212640     | 0.011%       | 0.115%     |
| 2      | 1.376    | 351        | 429      | 378       | BV    | 78412       | 222740     | 2.71%        | 0.118%     |
| 3      | 7.826    | 741        | 769      | 788       | GV    | 91412       | 118274     | 1.03%        | 1.053%     |
| 4      | 8.512    | 878        | 875      | 879       | VB    | 4249752     | 43174554   | 100.00%      | 98.003%    |
| 5      | 8.674    | 2231       | 2242     | 2275      | BB    | 4497609     | 1894240    | 1.81%        | 1.020%     |

## Area Percent Report

Data File : CH-21.D  
 Acq On : 04 Aug 2024 11:01  
 Operator :  
 Sample : CH-21  
 Misc :  
 ALS Vial : 1 Sample Multiplier: 1

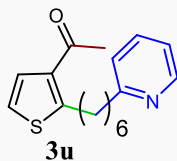

Integration Parameters: autoint1.e  
 Integrator: ChemStation

Method : C:\MassHunter\GCMS\3\methods\Method 11\_H2\_CO\_DETECTION.M  
 Title :

Signal : TIC: CH-21.D\data.ms

| peak # | R.T. min | first scan | max scan | last scan | PK TY | peak height | corr. area | corr. % max. | % of total |
|--------|----------|------------|----------|-----------|-------|-------------|------------|--------------|------------|
| 1      | 1.306    | 221        | 219      | 378       | BV    | 87712       | 212640     | 2.011%       | 2.115%     |
| 2      | 1.376    | 351        | 429      | 378       | BV    | 78412       | 222740     | 1.71%        | 2.118%     |
| 3      | 7.826    | 741        | 769      | 788       | GV    | 91412       | 118274     | 1.03%        | 1.053%     |
| 4      | 8.512    | 878        | 875      | 879       | VB    | 4249752     | 43174554   | 1.00%        | 4.003%     |
| 5      | 8.674    | 2231       | 2242     | 2275      | BB    | 4497609     | 1894240    | 1.81%        | 1.020%     |
| 6      | 9.512    | 978        | 875      | 879       | VB    | 4249752     | 43174554   | 100.00%      | 90.003%    |

## Area Percent Report

Data File : CH-22.D  
 Acq On : 04 Aug 2024 09:11  
 Operator :  
 Sample : CH-22  
 Misc :  
 ALS Vial : 1 Sample Multiplier: 1

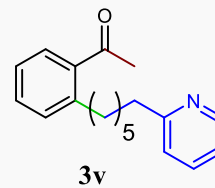

Integration Parameters: autoint1.e  
 Integrator: ChemStation

Method : C:\MassHunter\GCMS\3\methods\Method 11\_H2\_CO\_DETECTION.M  
 Title :

Signal : TIC: CH-22.D\data.ms

| peak # | R.T. min | first scan | max scan | last scan | PK TY | peak height | corr. area | corr. % max. | % of total |
|--------|----------|------------|----------|-----------|-------|-------------|------------|--------------|------------|
| 1      | 1.306    | 221        | 219      | 378       | BV    | 87712       | 212640     | 2.011%       | 3.115%     |
| 2      | 1.376    | 351        | 429      | 378       | BV    | 78412       | 222740     | 1.71%        | 2.118%     |
| 3      | 7.826    | 741        | 769      | 788       | GV    | 91412       | 118274     | 1.03%        | 1.053%     |
| 4      | 8.512    | 878        | 875      | 879       | VB    | 4249752     | 43174554   | 2.70%        | 3.103%     |
| 5      | 8.674    | 2231       | 2242     | 2275      | BB    | 4497609     | 1894240    | 1.81%        | 0.920%     |
| 6      | 8.924    | 978        | 875      | 879       | VB    | 4249752     | 43174554   | 100.00%      | 90.003%    |

## Area Percent Report

Data File : CH-23.D  
 Acq On : 04 Aug 2024 11:45  
 Operator :  
 Sample : CH-23  
 Misc :  
 ALS Vial : 1 Sample Multiplier: 1

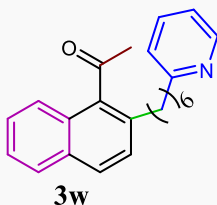

Integration Parameters: autoint1.e  
 Integrator: ChemStation

Method : C:\MassHunter\GCMS\3\methods\Method 11\_H2\_CO\_DETECTION.M  
 Title :

Signal : TIC: CH-23.D\data.ms

| peak # | R.T. min | first scan | max scan | last scan | PK TY | peak height | corr. area | corr. % max. | % of total |
|--------|----------|------------|----------|-----------|-------|-------------|------------|--------------|------------|
| 1      | 1.306    | 221        | 219      | 378       | BV    | 87712       | 212640     | 2.011%       | 3.115%     |
| 2      | 1.376    | 351        | 429      | 378       | BV    | 78412       | 222740     | 1.71%        | 2.118%     |
| 3      | 7.826    | 741        | 769      | 788       | GV    | 91412       | 118274     | 1.03%        | 1.053%     |
| 4      | 8.512    | 878        | 875      | 879       | VB    | 4249752     | 43174554   | 3.70%        | 4.103%     |
| 5      | 8.674    | 2231       | 2242     | 2275      | BB    | 4497609     | 1894240    | 1.81%        | 0.920%     |
| 6      | 8.714    | 978        | 875      | 879       | VB    | 4249752     | 43174554   | 100.00%      | 88.103%    |

## Area Percent Report

Data File : CH-24.D  
 Acq On : 06 Aug 2024 11:30  
 Operator :  
 Sample : CH-24  
 Misc :  
 ALS Vial : 1 Sample Multiplier: 1

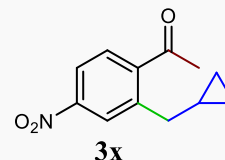

Integration Parameters: autoint1.e  
 Integrator: ChemStation

Method : C:\MassHunter\GCMS\3\methods\Method 11\_H2\_CO\_DETECTION.M  
 Title :

Signal : TIC: CH-24.D\data.ms

| peak # | R.T. min | first scan | max scan | last scan | PK TY | peak height | corr. area | corr. % max. | % of total |
|--------|----------|------------|----------|-----------|-------|-------------|------------|--------------|------------|
| 1      | 1.306    | 221        | 219      | 378       | BV    | 87712       | 212640     | 0.011%       | 2.115%     |
| 2      | 1.376    | 351        | 429      | 378       | BV    | 78412       | 222740     | 2.71%        | 1.118%     |
| 3      | 5.376    | 351        | 429      | 378       | BV    | 78412       | 222740     | 2.31%        | 1.118%     |
| 4      | 7.426    | 741        | 769      | 788       | GV    | 91412       | 1118274    | 5.03%        | 5.053%     |
| 5      | 8.512    | 878        | 875      | 879       | VB    | 4249752     | 43174554   | 100.00%      | 90.007%    |
| 6      | 8.674    | 2231       | 2242     | 2275      | BB    | 4497609     | 1894240    | 1.81%        | 1.020%     |

## Area Percent Report

Data File : CH-25.D  
 Acq On : 07 Aug 2024 11:01  
 Operator :  
 Sample : CH-25  
 Misc :  
 ALS Vial : 1 Sample Multiplier: 1

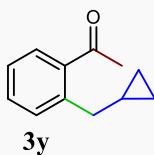

Integration Parameters: autoint1.e  
 Integrator: ChemStation

Method : C:\MassHunter\GCMS\3\methods\Method 11\_H2\_CO\_DETECTION.M  
 Title :

Signal : TIC: CH-25.D\data.ms

| peak # | R.T. min | first scan | max scan | last scan | PK TY | peak height | corr. area | corr. % max. | % of total |
|--------|----------|------------|----------|-----------|-------|-------------|------------|--------------|------------|
| 1      | 1.306    | 221        | 219      | 378       | BV    | 87712       | 212640     | 0.011%       | 0.115%     |
| 2      | 1.376    | 351        | 429      | 378       | BV    | 78412       | 222740     | 1.71%        | 0.118%     |
| 3      | 5.376    | 351        | 429      | 378       | BV    | 78412       | 222740     | 1.31%        | 1.118%     |
| 4      | 7.426    | 741        | 769      | 788       | GV    | 91412       | 1118274    | 5.03%        | 1.053%     |
| 5      | 7.512    | 878        | 875      | 879       | VB    | 4249752     | 43174554   | 100.00%      | 97.107%    |
| 6      | 8.674    | 2231       | 2242     | 2275      | BB    | 4497609     | 1894240    | 1.81%        | 0.920%     |

## Area Percent Report

Data File : CH-26.D  
 Acq On : 04 Aug 2024 9:27  
 Operator :  
 Sample : CH-26  
 Misc :  
 ALS Vial : 1 Sample Multiplier: 1

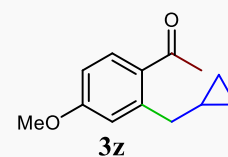

Integration Parameters: autoint1.e  
 Integrator: ChemStation

Method : C:\MassHunter\GCMS\3\methods\Method 11\_H2\_CO\_DETECTION.M  
 Title :

Signal : TIC: CH-26.D\data.ms

| peak # | R.T. min | first scan | max scan | last scan | PK TY | peak height | corr. area | corr. % max. | % of total |
|--------|----------|------------|----------|-----------|-------|-------------|------------|--------------|------------|
| 1      | 1.306    | 221        | 219      | 378       | BV    | 87712       | 212640     | 0.011%       | 1.115%     |
| 2      | 1.376    | 351        | 429      | 378       | BV    | 78412       | 222740     | 1.71%        | 2.118%     |
| 3      | 5.376    | 351        | 429      | 378       | BV    | 78412       | 222740     | 1.31%        | 1.118%     |
| 4      | 6.126    | 741        | 769      | 788       | GV    | 91412       | 1118274    | 5.03%        | 4.753%     |
| 5      | 7.512    | 878        | 875      | 879       | VB    | 4249752     | 43174554   | 100.00%      | 89.907%    |
| 6      | 8.674    | 2231       | 2242     | 2275      | BB    | 4497609     | 2094240    | 1.91%        | 1.920%     |

## Area Percent Report

Data File : CH-27.D  
Acq On : 02 Aug 2024 10:27  
Operator :  
Sample : CH-27  
Misc :  
ALS Vial : 1 Sample Multiplier: 1

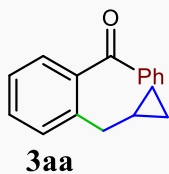

Integration Parameters: autoint1.e  
Integrator: ChemStation

Method : C:\MassHunter\GCMS\3\methods\Method 11\_H2\_CO\_DETECTION.M  
Title :

Signal : TIC: CH-27.D\data.ms

| peak # | R.T. min | first scan | max scan | last scan | PK TY | peak height | corr. area | corr. % max. | % of total |
|--------|----------|------------|----------|-----------|-------|-------------|------------|--------------|------------|
| 1      | 1.306    | 221        | 219      | 378       | BV    | 87712       | 212640     | 0.011%       | 1.115%     |
| 2      | 2.376    | 351        | 429      | 378       | BV    | 78412       | 222740     | 1.71%        | 2.118%     |
| 3      | 5.316    | 351        | 429      | 378       | BV    | 78412       | 222740     | 1.31%        | 1.118%     |
| 4      | 5.626    | 741        | 769      | 788       | GV    | 91412       | 1118274    | 5.03%        | 4.953%     |
| 5      | 8.512    | 878        | 875      | 879       | VB    | 4249752     | 43174554   | 100.00%      | 90.017%    |
| 6      | 8.674    | 2231       | 2242     | 2275      | BB    | 4497609     | 2094240    | 0.91%        | 0.920%     |

## Area Percent Report

Data File : CH-28.D  
Acq On : 01 Aug 2024 11:27  
Operator :  
Sample : CH-28  
Misc :  
ALS Vial : 1 Sample Multiplier: 1

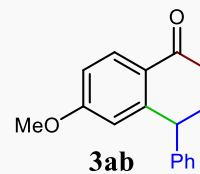

Integration Parameters: autoint1.e  
Integrator: ChemStation

Method : C:\MassHunter\GCMS\3\methods\Method 11\_H2\_CO\_DETECTION.M  
Title :

Signal : TIC: CH-28.D\data.ms

| peak # | R.T. min | first scan | max scan | last scan | PK TY | peak height | corr. area | corr. % max. | % of total |
|--------|----------|------------|----------|-----------|-------|-------------|------------|--------------|------------|
| 1      | 1.306    | 221        | 219      | 378       | BV    | 87712       | 212640     | 0.011%       | 1.315%     |
| 2      | 2.376    | 351        | 429      | 378       | BV    | 78412       | 222740     | 1.71%        | 2.018%     |
| 3      | 5.316    | 351        | 429      | 378       | BV    | 78412       | 222740     | 1.31%        | 1.218%     |
| 4      | 7.512    | 878        | 875      | 879       | VB    | 4249752     | 43174554   | 100.00%      | 95.107%    |
| 5      | 8.674    | 2231       | 2242     | 2275      | BB    | 4497609     | 2094240    | 0.91%        | 0.920%     |

## Area Percent Report

Data File : CH-29.D  
Acq On : 01 Aug 2024 10:17  
Operator :  
Sample : CH-29  
Misc :  
ALS Vial : 1 Sample Multiplier: 1

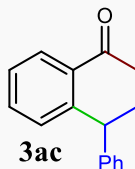

Integration Parameters: autoint1.e  
Integrator: ChemStation

Method : C:\MassHunter\GCMS\3\methods\Method 11\_H2\_CO\_DETECTION.M  
Title :

Signal : TIC: CH-29.D\data.ms

| peak # | R.T. min | first scan | max scan | last scan | PK TY | peak height | corr. area | corr. % max. | % of total |
|--------|----------|------------|----------|-----------|-------|-------------|------------|--------------|------------|
| 1      | 1.306    | 221        | 219      | 378       | BV    | 87712       | 212640     | 0.011%       | 0.315%     |
| 2      | 2.376    | 351        | 429      | 378       | BV    | 78412       | 222740     | 0.71%        | 0.018%     |
| 3      | 5.316    | 351        | 429      | 378       | BV    | 78412       | 222740     | 1.31%        | 1.218%     |
| 4      | 8.512    | 878        | 875      | 879       | VB    | 4249752     | 43174554   | 100.00%      | 98.004%    |
| 5      | 8.674    | 2231       | 2242     | 2275      | BB    | 4497609     | 2094240    | 0.91%        | 0.920%     |

## Area Percent Report

Data File : CH-30.D  
Acq On : 08 Aug 2024 12:17  
Operator :  
Sample : CH-30  
Misc :  
ALS Vial : 1 Sample Multiplier: 1

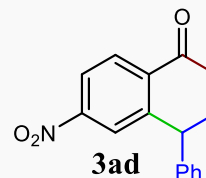

Integration Parameters: autoint1.e  
Integrator: ChemStation

Method : C:\MassHunter\GCMS\3\methods\Method 11\_H2\_CO\_DETECTION.M  
Title :

Signal : TIC: CH-29.D\data.ms

| peak # | R.T. min | first scan | max scan | last scan | PK TY | peak height | corr. area | corr. % max. | % of total |
|--------|----------|------------|----------|-----------|-------|-------------|------------|--------------|------------|
| 1      | 1.306    | 221        | 219      | 378       | BV    | 87712       | 212640     | 1.011%       | 2.315%     |
| 2      | 2.376    | 351        | 429      | 378       | BV    | 78412       | 222740     | 2.71%        | 2.018%     |
| 3      | 5.316    | 351        | 429      | 378       | BV    | 78412       | 222740     | 1.31%        | 3.218%     |
| 4      | 6.316    | 351        | 429      | 378       | BV    | 78412       | 222740     | 1.31%        | 2.218%     |
| 5      | 8.512    | 878        | 875      | 879       | VB    | 4249752     | 43174554   | 100.00%      | 89.804%    |
| 6      | 8.674    | 2231       | 2242     | 2275      | BB    | 4497609     | 2094240    | 0.91%        | 0.920%     |

## Area Percent Report

Data File : CH-31.D  
Acq On : 07 Aug 2024 10:17  
Operator :  
Sample : CH-31  
Misc :  
ALS Vial : 1 Sample Multiplier: 1

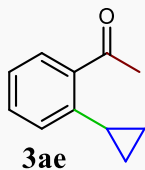

Integration Parameters: autoint1.e  
Integrator: ChemStation

Method : C:\MassHunter\GCMS\3\methods\Method 11\_H2\_CO\_DETECTION.M  
Title :

Signal : TIC: CH-31.D\data.ms

| peak # | R.T. min | first scan | max scan | last scan | PK TY | peak height | corr. area | corr. % max. | % of total |
|--------|----------|------------|----------|-----------|-------|-------------|------------|--------------|------------|
| 1      | 1.306    | 221        | 219      | 378       | BV    | 87712       | 212640     | 1.011%       | 0.015%     |
| 2      | 2.376    | 351        | 429      | 378       | BV    | 78412       | 222740     | 0.71%        | 0.018%     |
| 3      | 7.316    | 351        | 429      | 378       | BV    | 78412       | 222740     | 1.31%        | 2.218%     |
| 4      | 8.512    | 878        | 875      | 879       | VB    | 4249752     | 43174554   | 100.00%      | 97.304%    |
| 5      | 8.674    | 2231       | 2242     | 2275      | BB    | 4497609     | 2094240    | 0.91%        | 0.920%     |

## Area Percent Report

Data File : CH-32.D  
Acq On : 06 Aug 2024 10:15  
Operator :  
Sample : CH-32  
Misc :  
ALS Vial : 1 Sample Multiplier: 1

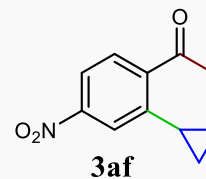

Integration Parameters: autoint1.e  
Integrator: ChemStation

Method : C:\MassHunter\GCMS\3\methods\Method 11\_H2\_CO\_DETECTION.M  
Title :

Signal : TIC: CH-32.D\data.ms

| peak # | R.T. min | first scan | max scan | last scan | PK TY | peak height | corr. area | corr. % max. | % of total |
|--------|----------|------------|----------|-----------|-------|-------------|------------|--------------|------------|
| 1      | 1.306    | 221        | 219      | 378       | BV    | 87712       | 212640     | 1.011%       | 2.315%     |
| 2      | 2.376    | 351        | 429      | 378       | BV    | 78412       | 222740     | 2.71%        | 2.018%     |
| 3      | 4.216    | 351        | 429      | 378       | BV    | 78412       | 222740     | 1.31%        | 3.218%     |
| 4      | 4.316    | 351        | 429      | 378       | BV    | 78412       | 222740     | 1.31%        | 2.218%     |
| 5      | 8.772    | 878        | 875      | 879       | VB    | 4249752     | 43174554   | 100.00%      | 90.204%    |
| 6      | 8.674    | 2231       | 2242     | 2275      | BB    | 4497609     | 2094240    | 0.91%        | 1.120%     |



## Area Percent Report

Data File : CH-33.D  
Acq On : 04 Aug 2024 10:12  
Operator :  
Sample : CH-33  
Misc :  
ALS Vial : 1 Sample Multiplier: 1

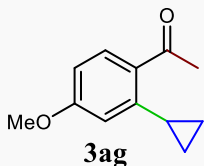

3ag

Integration Parameters: autoint1.e  
Integrator: ChemStation

Method : C:\MassHunter\GCMS\3\methods\Method 11\_H2\_CO\_DETECTION.M  
Title :

Signal : TIC: CH-33.D\data.ms

| peak # | R.T. min | first scan | max scan | last scan | PK TY | peak height | corr. area | corr. % max. | % of total |
|--------|----------|------------|----------|-----------|-------|-------------|------------|--------------|------------|
| 1      | 1.306    | 221        | 219      | 378       | BV    | 87712       | 212640     | 1.011%       | 0.715%     |
| 2      | 2.376    | 351        | 429      | 378       | BV    | 78412       | 222740     | 2.71%        | 2.018%     |
| 3      | 4.316    | 351        | 429      | 378       | BV    | 78412       | 222740     | 1.31%        | 1.218%     |
| 4      | 8.772    | 878        | 875      | 879       | VB    | 4249752     | 43174554   | 100.00%      | 95.007%    |
| 5      | 8.674    | 2231       | 2242     | 2275      | BB    | 4497609     | 2094240    | 0.91%        | 0.920%     |

## Area Percent Report

Data File : CH-34.D  
Acq On : 03 Aug 2024 10:11  
Operator :  
Sample : CH-34  
Misc :  
ALS Vial : 1 Sample Multiplier: 1

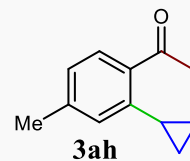

3ah

Integration Parameters: autoint1.e  
Integrator: ChemStation

Method : C:\MassHunter\GCMS\3\methods\Method 11\_H2\_CO\_DETECTION.M  
Title :

Signal : TIC: CH-34.D\data.ms

| peak # | R.T. min | first scan | max scan | last scan | PK TY | peak height | corr. area | corr. % max. | % of total |
|--------|----------|------------|----------|-----------|-------|-------------|------------|--------------|------------|
| 1      | 1.306    | 221        | 219      | 378       | BV    | 87712       | 212640     | 1.011%       | 1.715%     |
| 2      | 2.376    | 351        | 429      | 378       | BV    | 78412       | 222740     | 2.71%        | 2.018%     |
| 3      | 4.316    | 351        | 429      | 378       | BV    | 78412       | 222740     | 1.31%        | 1.218%     |
| 4      | 7.673    | 878        | 875      | 879       | VB    | 4249752     | 43174554   | 100.00%      | 96.107%    |
| 5      | 8.674    | 2231       | 2242     | 2275      | BB    | 4497609     | 2094240    | 0.91%        | 1.320%     |

## Area Percent Report

Data File : CH-35.D  
Acq On : 01 Aug 2024 11:11  
Operator :  
Sample : CH-35  
Misc :  
ALS Vial : 1 Sample Multiplier: 1

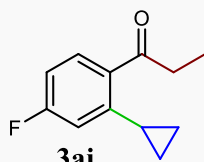

3ai

Integration Parameters: autoint1.e  
Integrator: ChemStation

Method : C:\MassHunter\GCMS\3\methods\Method 11\_H2\_CO\_DETECTION.M  
Title :

Signal : TIC: CH-35.D\data.ms

| peak # | R.T. min | first scan | max scan | last scan | PK TY | peak height | corr. area | corr. % max. | % of total |
|--------|----------|------------|----------|-----------|-------|-------------|------------|--------------|------------|
| 1      | 1.306    | 221        | 219      | 378       | BV    | 87712       | 212640     | 1.011%       | 1.715%     |
| 2      | 2.376    | 351        | 429      | 378       | BV    | 78412       | 222740     | 2.71%        | 1.018%     |
| 3      | 4.316    | 351        | 429      | 378       | BV    | 78412       | 222740     | 2.31%        | 2.318%     |
| 4      | 7.673    | 878        | 875      | 879       | VB    | 4249752     | 43174554   | 100.00%      | 95.417%    |
| 5      | 8.674    | 2231       | 2242     | 2275      | BB    | 4497609     | 2094240    | 0.91%        | 1.320%     |

## Area Percent Report

Data File : CH-36.D  
Acq On : 08 Aug 2024 10:09  
Operator :  
Sample : CH-36  
Misc :  
ALS Vial : 1 Sample Multiplier: 1

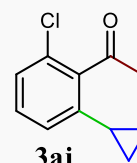

3aj

Integration Parameters: autoint1.e  
Integrator: ChemStation

Method : C:\MassHunter\GCMS\3\methods\Method 11\_H2\_CO\_DETECTION.M  
Title :

Signal : TIC: CH-36.D\data.ms

| peak # | R.T. min | first scan | max scan | last scan | PK TY | peak height | corr. area | corr. % max. | % of total |
|--------|----------|------------|----------|-----------|-------|-------------|------------|--------------|------------|
| 1      | 1.306    | 221        | 219      | 378       | BV    | 87712       | 212640     | 1.011%       | 1.715%     |
| 2      | 2.376    | 351        | 429      | 378       | BV    | 78412       | 222740     | 1.71%        | 1.018%     |
| 3      | 4.316    | 351        | 429      | 378       | BV    | 78412       | 222740     | 2.31%        | 2.318%     |
| 4      | 7.313    | 678        | 875      | 879       | VB    | 4249752     | 43174554   | 4.80%        | 5.417%     |
| 5      | 8.573    | 878        | 875      | 879       | VB    | 4249752     | 43174554   | 100.00%      | 90.017%    |
| 6      | 8.674    | 2231       | 2242     | 2275      | BB    | 4497609     | 2094240    | 1.01%        | 1.020%     |

## Area Percent Report

Data File : CH-37.D  
Acq On : 10 Aug 2024 10:09  
Operator :  
Sample : CH-37  
Misc :  
ALS Vial : 1 Sample Multiplier: 1

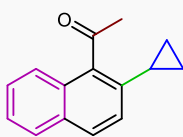

3ak

Integration Parameters: autoint1.e  
Integrator: ChemStation

Method : C:\MassHunter\GCMS\3\methods\Method 11\_H2\_CO\_DETECTION.M  
Title :

Signal : TIC: CH-37.D\data.ms

| peak # | R.T. min | first scan | max scan | last scan | PK TY | peak height | corr. area | corr. % max. | % of total |
|--------|----------|------------|----------|-----------|-------|-------------|------------|--------------|------------|
| 1      | 1.306    | 221        | 219      | 378       | BV    | 87712       | 212640     | 1.011%       | 0.715%     |
| 2      | 2.376    | 351        | 429      | 378       | BV    | 78412       | 222740     | 1.71%        | 1.018%     |
| 3      | 4.316    | 351        | 429      | 378       | BV    | 78412       | 222740     | 2.31%        | 2.318%     |
| 4      | 8.673    | 878        | 875      | 879       | VB    | 4249752     | 43174554   | 100.00%      | 96.017%    |
| 5      | 8.774    | 2231       | 2242     | 2275      | BB    | 4497609     | 2094240    | 1.01%        | 1.020%     |

## Area Percent Report

Data File : CH-38.D  
Acq On : 8 Aug 2024 10:12  
Operator :  
Sample : CH-38  
Misc :  
ALS Vial : 1 Sample Multiplier: 1

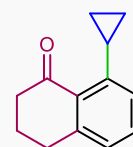

3al

Integration Parameters: autoint1.e  
Integrator: ChemStation

Method : C:\MassHunter\GCMS\3\methods\Method 11\_H2\_CO\_DETECTION.M  
Title :

Signal : TIC: CH-38.D\data.ms

| peak # | R.T. min | first scan | max scan | last scan | PK TY | peak height | corr. area | corr. % max. | % of total |
|--------|----------|------------|----------|-----------|-------|-------------|------------|--------------|------------|
| 1      | 1.306    | 221        | 219      | 378       | BV    | 87712       | 212640     | 1.011%       | 0.715%     |
| 2      | 2.376    | 351        | 429      | 378       | BV    | 78412       | 222740     | 1.71%        | 1.018%     |
| 3      | 4.316    | 351        | 429      | 378       | BV    | 78412       | 222740     | 2.31%        | 2.318%     |
| 4      | 7.673    | 878        | 875      | 879       | VB    | 4249752     | 43174554   | 100.00%      | 95.017%    |
| 5      | 8.774    | 2231       | 2242     | 2275      | BB    | 4497609     | 2094240    | 1.01%        | 1.020%     |

## Area Percent Report

Data File : CH-39.D  
 Acq On : 7 Aug 2024 10:35  
 Operator :  
 Sample : CH-39  
 Misc :  
 ALS Vial : 1 Sample Multiplier: 1

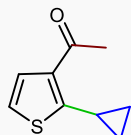**3am**

Integration Parameters: autoint1.e  
 Integrator: ChemStation

Method : C:\MassHunter\GCMS\3\methods\Method 11\_H2\_CO\_DETECTION.M  
 Title :

Signal : TIC: CH-39.D\data.ms

| peak # | R.T. min | first scan | max scan | last scan | PK TY | peak height | corr. area | corr. % max. | % of total |
|--------|----------|------------|----------|-----------|-------|-------------|------------|--------------|------------|
| 1      | 1.306    | 221        | 219      | 378       | BV    | 87712       | 212640     | 1.011%       | 0.715%     |
| 2      | 2.376    | 351        | 429      | 378       | BV    | 78412       | 222740     | 1.71%        | 1.018%     |
| 3      | 4.316    | 351        | 429      | 378       | BV    | 78412       | 222740     | 2.31%        | 2.318%     |
| 4      | 5.016    | 351        | 429      | 378       | BV    | 78412       | 222740     | 4.31%        | 5.318%     |
| 5      | 7.673    | 878        | 875      | 879       | VB    | 4249752     | 43174554   | 100.00%      | 90.017%    |
| 6      | 8.774    | 2231       | 2242     | 2275      | BB    | 4497609     | 2094240    | 1.01%        | 1.020%     |

## Area Percent Report

Data File : CH-40.D  
 Acq On : 8 Aug 2024 11:35  
 Operator :  
 Sample : CH-40  
 Misc :  
 ALS Vial : 1 Sample Multiplier: 1

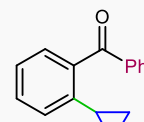**3an**

Integration Parameters: autoint1.e  
 Integrator: ChemStation

Method : C:\MassHunter\GCMS\3\methods\Method 11\_H2\_CO\_DETECTION.M  
 Title :

Signal : TIC: CH-39.D\data.ms

| peak # | R.T. min | first scan | max scan | last scan | PK TY | peak height | corr. area | corr. % max. | % of total |
|--------|----------|------------|----------|-----------|-------|-------------|------------|--------------|------------|
| 1      | 1.306    | 221        | 219      | 378       | BV    | 87712       | 212640     | 1.011%       | 0.715%     |
| 2      | 2.376    | 351        | 429      | 378       | BV    | 78412       | 222740     | 1.71%        | 1.118%     |
| 3      | 4.316    | 351        | 429      | 378       | BV    | 78412       | 222740     | 2.31%        | 2.118%     |
| 4      | 4.716    | 351        | 429      | 378       | BV    | 78412       | 222740     | 4.31%        | 4.918%     |
| 5      | 8.573    | 878        | 875      | 879       | VB    | 4249752     | 43174554   | 100.00%      | 90.017%    |
| 6      | 8.774    | 2231       | 2242     | 2275      | BB    | 4497609     | 2094240    | 1.01%        | 1.020%     |

## Area Percent Report

Data File : CH-41.D  
 Acq On : 5 Aug 2024 10:25  
 Operator :  
 Sample : CH-41  
 Misc :  
 ALS Vial : 1 Sample Multiplier: 1

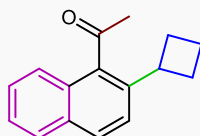**3ao**

Integration Parameters: autoint1.e  
 Integrator: ChemStation

Method : C:\MassHunter\GCMS\3\methods\Method 11\_H2\_CO\_DETECTION.M  
 Title :

Signal : TIC: CH-41.D\data.ms

| peak # | R.T. min | first scan | max scan | last scan | PK TY | peak height | corr. area | corr. % max. | % of total |
|--------|----------|------------|----------|-----------|-------|-------------|------------|--------------|------------|
| 1      | 1.306    | 221        | 219      | 378       | BV    | 87712       | 212640     | 1.011%       | 0.715%     |
| 2      | 2.396    | 351        | 429      | 378       | BV    | 78412       | 222740     | 1.71%        | 1.118%     |
| 3      | 3.316    | 351        | 429      | 378       | BV    | 78412       | 222740     | 2.31%        | 2.118%     |
| 4      | 6.516    | 351        | 429      | 378       | BV    | 78412       | 222740     | 4.31%        | 5.118%     |
| 5      | 8.663    | 878        | 875      | 879       | VB    | 4249752     | 43174554   | 100.00%      | 89.817%    |
| 6      | 8.794    | 2231       | 2242     | 2275      | BB    | 4497609     | 2094240    | 1.01%        | 1.020%     |

## Area Percent Report

Data File : CH-42.D  
 Acq On : 3 Aug 2024 11:20  
 Operator :  
 Sample : CH-42  
 Misc :  
 ALS Vial : 1 Sample Multiplier: 1

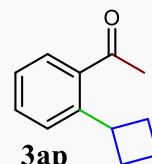**3ap**

Integration Parameters: autoint1.e  
 Integrator: ChemStation

Method : C:\MassHunter\GCMS\3\methods\Method 11\_H2\_CO\_DETECTION.M  
 Title :

Signal : TIC: CH-42.D\data.ms

| peak # | R.T. min | first scan | max scan | last scan | PK TY | peak height | corr. area | corr. % max. | % of total |
|--------|----------|------------|----------|-----------|-------|-------------|------------|--------------|------------|
| 1      | 1.306    | 221        | 219      | 378       | BV    | 87712       | 212640     | 1.011%       | 0.715%     |
| 2      | 2.396    | 351        | 429      | 378       | BV    | 78412       | 222740     | 1.71%        | 1.118%     |
| 3      | 3.316    | 351        | 429      | 378       | BV    | 78412       | 222740     | 2.31%        | 2.118%     |
| 4      | 6.516    | 351        | 429      | 378       | BV    | 78412       | 222740     | 4.31%        | 4.788%     |
| 5      | 8.663    | 878        | 875      | 879       | VB    | 4249752     | 43174554   | 100.00%      | 89.997%    |
| 6      | 8.794    | 2231       | 2242     | 2275      | BB    | 4497609     | 2094240    | 1.01%        | 0.720%     |

## Area Percent Report

Data File : CH-44.D  
 Acq On : 3 Aug 2024 11:37  
 Operator :  
 Sample : CH-44  
 Misc :  
 ALS Vial : 1 Sample Multiplier: 1

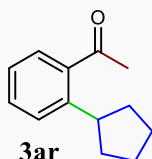**3ar**

Integration Parameters: autoint1.e  
 Integrator: ChemStation

Method : C:\MassHunter\GCMS\3\methods\Method 11\_H2\_CO\_DETECTION.M  
 Title :

Signal : TIC: CH-44.D\data.ms

| peak # | R.T. min | first scan | max scan | last scan | PK TY | peak height | corr. area | corr. % max. | % of total |
|--------|----------|------------|----------|-----------|-------|-------------|------------|--------------|------------|
| 1      | 1.306    | 221        | 219      | 378       | BV    | 87712       | 212640     | 1.011%       | 0.715%     |
| 2      | 2.396    | 351        | 429      | 378       | BV    | 78412       | 222740     | 1.71%        | 1.118%     |
| 3      | 3.316    | 351        | 429      | 378       | BV    | 78412       | 222740     | 2.31%        | 2.118%     |
| 4      | 6.516    | 351        | 429      | 378       | BV    | 78412       | 222740     | 100.00%      | 95.788%    |
| 5      | 8.794    | 2231       | 2242     | 2275      | BB    | 4497609     | 2094240    | 1.01%        | 0.720%     |

## Area Percent Report

Data File : CH-45.D  
 Acq On : 4 Aug 2024 10:37  
 Operator :  
 Sample : CH-45  
 Misc :  
 ALS Vial : 1 Sample Multiplier: 1

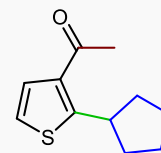**3as**

Integration Parameters: autoint1.e  
 Integrator: ChemStation

Method : C:\MassHunter\GCMS\3\methods\Method 11\_H2\_CO\_DETECTION.M  
 Title :

Signal : TIC: CH-45.D\data.ms

| peak # | R.T. min | first scan | max scan | last scan | PK TY | peak height | corr. area | corr. % max. | % of total |
|--------|----------|------------|----------|-----------|-------|-------------|------------|--------------|------------|
| 1      | 1.306    | 221        | 219      | 378       | BV    | 87712       | 212640     | 1.011%       | 1.715%     |
| 2      | 2.396    | 351        | 429      | 378       | BV    | 78412       | 222740     | 1.71%        | 1.118%     |
| 3      | 3.316    | 351        | 429      | 378       | BV    | 78412       | 222740     | 2.31%        | 2.718%     |
| 4      | 5.016    | 351        | 429      | 378       | BV    | 78412       | 222740     | 2.31%        | 2.118%     |
| 5      | 6.516    | 351        | 429      | 378       | BV    | 78412       | 222740     | 100.00%      | 90.168%    |
| 6      | 8.694    | 2231       | 2242     | 2275      | BB    | 4497609     | 2094240    | 1.01%        | 1.020%     |



## Area Percent Report

Data File : CH-46.D  
 Acq On : 4 Aug 2024 11:37  
 Operator :  
 Sample : CH-46  
 Misc :  
 ALS Vial : 1 Sample Multiplier: 1

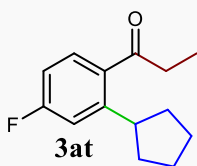

Integration Parameters: autoint1.e  
 Integrator: ChemStation

Method : C:\MassHunter\GCMS\3\methods\Method 11\_H2\_CO\_DETECTION.M  
 Title :

Signal : TIC: CH-46.D\data.ms

| peak # | R.T. min | first scan | max scan | last scan | PK TY | peak height | corr. area | corr. % max. | % of total |
|--------|----------|------------|----------|-----------|-------|-------------|------------|--------------|------------|
| 1      | 1.306    | 221        | 219      | 378       | BV    | 87712       | 212640     | 1.011%       | 1.915%     |
| 2      | 2.296    | 351        | 429      | 378       | BV    | 78412       | 222740     | 1.71%        | 2.118%     |
| 3      | 3.316    | 351        | 429      | 378       | BV    | 78412       | 222740     | 2.31%        | 1.718%     |
| 4      | 5.026    | 351        | 429      | 378       | BV    | 78412       | 222740     | 2.31%        | 3.118%     |
| 5      | 8.386    | 351        | 429      | 378       | BV    | 78412       | 222740     | 100.00%      | 90.168%    |
| 6      | 8.694    | 2231       | 2242     | 2275      | BB    | 4497609     | 2094240    | 1.01%        | 1.020%     |

## Area Percent Report

Data File : CH-47.D  
 Acq On : 12 Aug 2024 11:37  
 Operator :  
 Sample : CH-47  
 Misc :  
 ALS Vial : 1 Sample Multiplier: 1

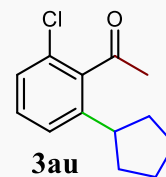

Integration Parameters: autoint1.e  
 Integrator: ChemStation

Method : C:\MassHunter\GCMS\3\methods\Method 11\_H2\_CO\_DETECTION.M  
 Title :

Signal : TIC: CH-47.D\data.ms

| peak # | R.T. min | first scan | max scan | last scan | PK TY | peak height | corr. area | corr. % max. | % of total |
|--------|----------|------------|----------|-----------|-------|-------------|------------|--------------|------------|
| 1      | 1.306    | 221        | 219      | 378       | BV    | 87712       | 212640     | 1.011%       | 1.915%     |
| 2      | 2.296    | 351        | 429      | 378       | BV    | 78412       | 222740     | 1.71%        | 2.518%     |
| 3      | 3.316    | 351        | 429      | 378       | BV    | 78412       | 222740     | 2.31%        | 2.318%     |
| 4      | 5.026    | 351        | 429      | 378       | BV    | 78412       | 222740     | 2.31%        | 2.918%     |
| 5      | 7.386    | 351        | 429      | 378       | BV    | 78412       | 222740     | 100.00%      | 90.468%    |
| 6      | 8.694    | 2231       | 2242     | 2275      | BB    | 4497609     | 2094240    | 1.31%        | 1.420%     |

## Area Percent Report

Data File : CH-48.D  
 Acq On : 12 Aug 2024 11:56  
 Operator :  
 Sample : CH-48  
 Misc :  
 ALS Vial : 1 Sample Multiplier: 1

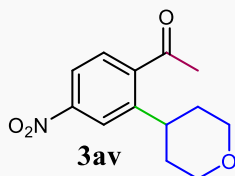

Integration Parameters: autoint1.e  
 Integrator: ChemStation

Method : C:\MassHunter\GCMS\3\methods\Method 11\_H2\_CO\_DETECTION.M  
 Title :

Signal : TIC: CH-48.D\data.ms

| peak # | R.T. min | first scan | max scan | last scan | PK TY | peak height | corr. area | corr. % max. | % of total |
|--------|----------|------------|----------|-----------|-------|-------------|------------|--------------|------------|
| 1      | 1.306    | 221        | 219      | 378       | BV    | 87712       | 212640     | 1.011%       | 1.915%     |
| 2      | 2.296    | 351        | 429      | 378       | BV    | 78412       | 222740     | 1.71%        | 2.518%     |
| 3      | 3.316    | 351        | 429      | 378       | BV    | 78412       | 222740     | 2.31%        | 0.718%     |
| 4      | 6.826    | 351        | 429      | 378       | BV    | 78412       | 222740     | 2.31%        | 2.018%     |
| 5      | 8.228    | 351        | 429      | 378       | BV    | 78412       | 222740     | 100.00%      | 92.138%    |
| 6      | 8.694    | 2231       | 2242     | 2275      | BB    | 4497609     | 2094240    | 1.31%        | 0.870%     |

## Area Percent Report

Data File : CH-49.D  
 Acq On : 11 Aug 2024 11:50  
 Operator :  
 Sample : CH-49  
 Misc :  
 ALS Vial : 1 Sample Multiplier: 1

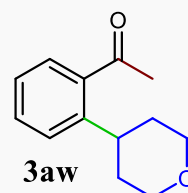

Integration Parameters: autoint1.e  
 Integrator: ChemStation

Method : C:\MassHunter\GCMS\3\methods\Method 11\_H2\_CO\_DETECTION.M  
 Title :

Signal : TIC: CH-49.D\data.ms

| peak # | R.T. min | first scan | max scan | last scan | PK TY | peak height | corr. area | corr. % max. | % of total |
|--------|----------|------------|----------|-----------|-------|-------------|------------|--------------|------------|
| 1      | 1.316    | 221        | 219      | 378       | BV    | 87712       | 212640     | 0.11%        | 0.215%     |
| 2      | 2.396    | 351        | 429      | 378       | BV    | 78412       | 222740     | 1.71%        | 1.118%     |
| 3      | 3.216    | 351        | 429      | 378       | BV    | 78412       | 222740     | 2.31%        | 0.718%     |
| 4      | 7.658    | 351        | 429      | 378       | BV    | 78412       | 222740     | 100.00%      | 98.038%    |
| 5      | 8.694    | 2231       | 2242     | 2275      | BB    | 4497609     | 2094240    | 0.31%        | 0.570%     |

## Area Percent Report

Data File : CH-50.D  
 Acq On : 11 Aug 2024 10:41  
 Operator :  
 Sample : CH-50  
 Misc :  
 ALS Vial : 1 Sample Multiplier: 1

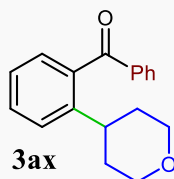

Integration Parameters: autoint1.e  
 Integrator: ChemStation

Method : C:\MassHunter\GCMS\3\methods\Method 11\_H2\_CO\_DETECTION.M  
 Title :

Signal : TIC: CH-50.D\data.ms

| peak # | R.T. min | first scan | max scan | last scan | PK TY | peak height | corr. area | corr. % max. | % of total |
|--------|----------|------------|----------|-----------|-------|-------------|------------|--------------|------------|
| 1      | 1.316    | 221        | 219      | 378       | BV    | 87712       | 212640     | 0.11%        | 1.215%     |
| 2      | 2.396    | 351        | 429      | 378       | BV    | 78412       | 222740     | 1.71%        | 2.118%     |
| 3      | 4.216    | 351        | 429      | 378       | BV    | 78412       | 222740     | 2.31%        | 2.718%     |
| 4      | 7.858    | 351        | 429      | 378       | BV    | 78412       | 222740     | 100.00%      | 92.148%    |
| 5      | 8.644    | 2231       | 2242     | 2275      | BB    | 4497609     | 2094240    | 1.31%        | 1.570%     |

## Area Percent Report

Data File : CH-51.D  
 Acq On : 11 Aug 2024 10:41  
 Operator :  
 Sample : CH-51  
 Misc :  
 ALS Vial : 1 Sample Multiplier: 1

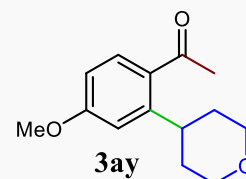

Integration Parameters: autoint1.e  
 Integrator: ChemStation

Method : C:\MassHunter\GCMS\3\methods\Method 11\_H2\_CO\_DETECTION.M  
 Title :

Signal : TIC: CH-51.D\data.ms

| peak # | R.T. min | first scan | max scan | last scan | PK TY | peak height | corr. area | corr. % max. | % of total |
|--------|----------|------------|----------|-----------|-------|-------------|------------|--------------|------------|
| 1      | 1.316    | 221        | 219      | 378       | BV    | 87712       | 212640     | 0.11%        | 1.215%     |
| 2      | 2.396    | 351        | 429      | 378       | BV    | 78412       | 222740     | 1.71%        | 1.118%     |
| 3      | 4.216    | 351        | 429      | 378       | BV    | 78412       | 222740     | 2.31%        | 1.318%     |
| 4      | 7.858    | 351        | 429      | 378       | BV    | 78412       | 244740     | 100.00%      | 96.248%    |
| 5      | 8.644    | 2231       | 2242     | 2275      | BB    | 4497609     | 2094240    | 1.71%        | 1.970%     |

## Area Percent Report

Data File : CH-52.D  
 Acq On : 10 Aug 2024 11:41  
 Operator :  
 Sample : CH-52  
 Misc :  
 ALS Vial : 1 Sample Multiplier: 1

Integration Parameters: autoint1.e  
 Integrator: ChemStation

Method : C:\MassHunter\GCMS\3\methods\Method 11\_H2\_CO\_DETECTION.M  
 Title :

Signal : TIC: CH-52.D\data.ms

| peak # | R.T. min | first scan | max scan | last scan | PK TY | peak height | corr. area | corr. % max. | % of total |
|--------|----------|------------|----------|-----------|-------|-------------|------------|--------------|------------|
| 1      | 1.316    | 221        | 219      | 378       | BV    | 87712       | 212640     | 0.11%        | 0.615%     |
| 2      | 2.396    | 351        | 429      | 378       | BV    | 78412       | 222740     | 1.71%        | 1.118%     |
| 3      | 4.216    | 332        | 429      | 378       | BV    | 78412       | 222740     | 2.31%        | 1.818%     |
| 4      | 5.216    | 363        | 429      | 378       | BV    | 78412       | 222740     | 2.31%        | 5.318%     |
| 5      | 8.548    | 385        | 429      | 378       | BV    | 78412       | 244740     | 100.00%      | 90.118%    |
| 6      | 8.644    | 2231       | 2242     | 2275      | BB    | 4497609     | 2094240    | 1.71%        | 1.970%     |

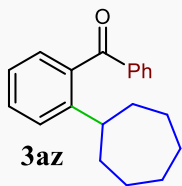

## Area Percent Report

Data File : CH-53.D  
 Acq On : 10 Aug 2024 09:41  
 Operator :  
 Sample : CH-53  
 Misc :  
 ALS Vial : 1 Sample Multiplier: 1

Integration Parameters: autoint1.e  
 Integrator: ChemStation

Method : C:\MassHunter\GCMS\3\methods\Method 11\_H2\_CO\_DETECTION.M  
 Title :

Signal : TIC: CH-53.D\data.ms

| peak # | R.T. min | first scan | max scan | last scan | PK TY | peak height | corr. area | corr. % max. | % of total |
|--------|----------|------------|----------|-----------|-------|-------------|------------|--------------|------------|
| 1      | 1.316    | 221        | 219      | 378       | BV    | 87712       | 212640     | 0.11%        | 0.085%     |
| 2      | 2.396    | 351        | 429      | 378       | BV    | 78412       | 222740     | 1.71%        | 1.118%     |
| 3      | 5.216    | 333        | 429      | 378       | BV    | 78412       | 222740     | 2.31%        | 1.318%     |
| 4      | 7.848    | 395        | 429      | 378       | BV    | 78412       | 244740     | 100.00%      | 96.218%    |
| 5      | 8.674    | 2231       | 2242     | 2275      | BB    | 4497609     | 2094240    | 1.71%        | 1.970%     |

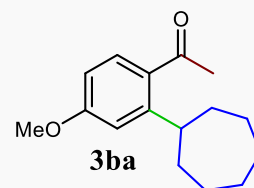

## Area Percent Report

Data File : CH-54.D  
 Acq On : 11 Aug 2024 11:45  
 Operator :  
 Sample : CH-54  
 Misc :  
 ALS Vial : 1 Sample Multiplier: 1

Integration Parameters: autoint1.e  
 Integrator: ChemStation

Method : C:\MassHunter\GCMS\3\methods\Method 11\_H2\_CO\_DETECTION.M  
 Title :

Signal : TIC: CH-54.D\data.ms

| peak # | R.T. min | first scan | max scan | last scan | PK TY | peak height | corr. area | corr. % max. | % of total |
|--------|----------|------------|----------|-----------|-------|-------------|------------|--------------|------------|
| 1      | 1.316    | 221        | 219      | 378       | BV    | 87712       | 212640     | 0.11%        | 0.985%     |
| 2      | 2.396    | 351        | 429      | 378       | BV    | 78412       | 222740     | 1.71%        | 1.118%     |
| 3      | 5.216    | 333        | 439      | 378       | BV    | 78412       | 222740     | 2.31%        | 1.318%     |
| 4      | 8.448    | 305        | 419      | 378       | BV    | 78412       | 244740     | 100.00%      | 95.118%    |
| 5      | 8.674    | 2231       | 2242     | 2275      | BB    | 4497609     | 2094240    | 1.71%        | 1.970%     |

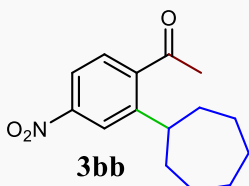

## Area Percent Report

Data File : CH-55.D  
 Acq On : 11 Aug 2024 13:40  
 Operator :  
 Sample : CH-55  
 Misc :  
 ALS Vial : 1 Sample Multiplier: 1

Integration Parameters: autoint1.e  
 Integrator: ChemStation

Method : C:\MassHunter\GCMS\3\methods\Method 11\_H2\_CO\_DETECTION.M  
 Title :

Signal : TIC: CH-55.D\data.ms

| peak # | R.T. min | first scan | max scan | last scan | PK TY | peak height | corr. area | corr. % max. | % of total |
|--------|----------|------------|----------|-----------|-------|-------------|------------|--------------|------------|
| 1      | 1.316    | 221        | 219      | 378       | BV    | 87712       | 212640     | 0.11%        | 0.985%     |
| 2      | 2.396    | 351        | 429      | 378       | BV    | 78412       | 222740     | 1.71%        | 0.118%     |
| 3      | 5.216    | 333        | 439      | 378       | BV    | 78412       | 222740     | 2.31%        | 1.318%     |
| 4      | 6.448    | 305        | 419      | 378       | BV    | 78412       | 244740     | 100.00%      | 98.008%    |
| 5      | 8.674    | 2231       | 2242     | 2275      | BB    | 4497609     | 2094240    | 1.71%        | 0.670%     |

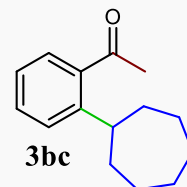

## Area Percent Report

Data File : CH-56.D  
 Acq On : 10 Aug 2024 12:40  
 Operator :  
 Sample : CH-56  
 Misc :  
 ALS Vial : 1 Sample Multiplier: 1

Integration Parameters: autoint1.e  
 Integrator: ChemStation

Method : C:\MassHunter\GCMS\3\methods\Method 11\_H2\_CO\_DETECTION.M  
 Title :

Signal : TIC: CH-56.D\data.ms

| peak # | R.T. min | first scan | max scan | last scan | PK TY | peak height | corr. area | corr. % max. | % of total |
|--------|----------|------------|----------|-----------|-------|-------------|------------|--------------|------------|
| 1      | 1.316    | 221        | 219      | 378       | BV    | 87712       | 212640     | 0.11%        | 0.985%     |
| 2      | 2.396    | 351        | 429      | 378       | BV    | 78412       | 222740     | 1.71%        | 1.118%     |
| 3      | 5.216    | 333        | 439      | 378       | BV    | 78412       | 222740     | 2.31%        | 5.318%     |
| 4      | 8.348    | 305        | 419      | 378       | BV    | 78412       | 244740     | 100.00%      | 92.108%    |
| 5      | 8.674    | 2231       | 2242     | 2275      | BB    | 4497609     | 2094240    | 1.71%        | 1.370%     |

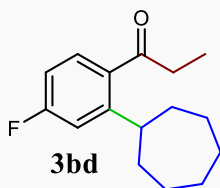

## Area Percent Report

Data File : CH-57.D  
 Acq On : 16 Aug 2024 11:40  
 Operator :  
 Sample : CH-57  
 Misc :  
 ALS Vial : 1 Sample Multiplier: 1

Integration Parameters: autoint1.e  
 Integrator: ChemStation

Method : C:\MassHunter\GCMS\3\methods\Method 11\_H2\_CO\_DETECTION.M  
 Title :

Signal : TIC: CH-57.D\data.ms

| peak # | R.T. min | first scan | max scan | last scan | PK TY | peak height | corr. area | corr. % max. | % of total |
|--------|----------|------------|----------|-----------|-------|-------------|------------|--------------|------------|
| 1      | 1.316    | 221        | 219      | 378       | BV    | 87712       | 212640     | 0.11%        | 0.985%     |
| 2      | 2.396    | 351        | 429      | 378       | BV    | 78412       | 222740     | 1.71%        | 0.318%     |
| 3      | 5.216    | 333        | 439      | 378       | BV    | 78412       | 222740     | 2.31%        | 3.318%     |
| 4      | 7.778    | 405        | 419      | 378       | BV    | 78412       | 244740     | 100.00%      | 96.108%    |
| 5      | 8.674    | 2231       | 2242     | 2275      | BB    | 4497609     | 2094240    | 1.71%        | 1.370%     |

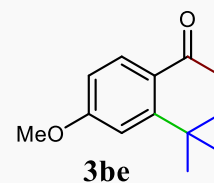

## Area Percent Report

Data File : CH-58.D  
Acq On : 16 Aug 2024 11:56  
Operator :  
Sample : CH-58  
Misc :  
ALS Vial : 1 Sample Multiplier: 1

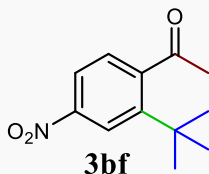

Integration Parameters: autoint1.e  
Integrator: ChemStation

Method : C:\MassHunter\GCMS\3\methods\Method 11\_H2\_CO\_DETECTION.M  
Title :

Signal : TIC: CH-58.D\data.ms

| peak<br># | R.T.<br>min | first<br>scan | max<br>scan | last<br>scan | PK<br>TY | peak<br>height | corr.<br>area | corr.<br>% max. | % of<br>total |
|-----------|-------------|---------------|-------------|--------------|----------|----------------|---------------|-----------------|---------------|
| 1         | 1.316       | 221           | 219         | 378          | BV       | 87712          | 212640        | 0.11%           | 0.985%        |
| 2         | 2.396       | 351           | 429         | 378          | BV       | 78412          | 222740        | 1.71%           | 1.318%        |
| 3         | 4.216       | 333           | 439         | 378          | BV       | 78412          | 222740        | 2.31%           | 7.318%        |
| 4         | 6.778       | 405           | 419         | 378          | BV       | 78412          | 244740        | 100.00%         | 90.008%       |
| 5         | 8.674       | 2231          | 2242        | 2275         | BB       | 4497609        | 2094240       | 1.71%           | 1.270%        |

## Area Percent Report

Data File : CH-59.D  
Acq On : 12 Aug 2024 10:52  
Operator :  
Sample : CH-59  
Misc :  
ALS Vial : 1 Sample Multiplier: 1

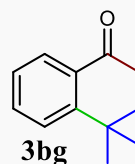

Integration Parameters: autoint1.e  
Integrator: ChemStation

Method : C:\MassHunter\GCMS\3\methods\Method 11\_H2\_CO\_DETECTION.M  
Title :

Signal : TIC: CH-59.D\data.ms

| peak<br># | R.T.<br>min | first<br>scan | max<br>scan | last<br>scan | PK<br>TY | peak<br>height | corr.<br>area | corr.<br>% max. | % of<br>total |
|-----------|-------------|---------------|-------------|--------------|----------|----------------|---------------|-----------------|---------------|
| 1         | 1.316       | 221           | 219         | 378          | BV       | 87712          | 212640        | 0.11%           | 0.085%        |
| 2         | 2.396       | 351           | 429         | 378          | BV       | 78412          | 222740        | 1.71%           | 0.318%        |
| 3         | 4.216       | 363           | 439         | 378          | BV       | 78412          | 222740        | 2.31%           | 1.318%        |
| 4         | 6.778       | 445           | 419         | 378          | BV       | 78412          | 244740        | 100.00%         | 98.208%       |
| 5         | 8.674       | 2231          | 2242        | 2275         | BB       | 4497609        | 2094240       | 1.71%           | 1.670%        |

## Area Percent Report

Data File : CH-60.D  
Acq On : 12 Aug 2024 10:52  
Operator :  
Sample : CH-60  
Misc :  
ALS Vial : 1 Sample Multiplier: 1

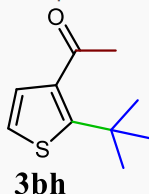

Integration Parameters: autoint1.e  
Integrator: ChemStation

Method : C:\MassHunter\GCMS\3\methods\Method 11\_H2\_CO\_DETECTION.M  
Title :

Signal : TIC: CH-60.D\data.ms

| peak<br># | R.T.<br>min | first<br>scan | max<br>scan | last<br>scan | PK<br>TY | peak<br>height | corr.<br>area | corr.<br>% max. | % of<br>total |
|-----------|-------------|---------------|-------------|--------------|----------|----------------|---------------|-----------------|---------------|
| 1         | 1.316       | 221           | 219         | 378          | BV       | 87712          | 212640        | 0.11%           | 0.785%        |
| 2         | 2.396       | 351           | 429         | 378          | BV       | 78412          | 222740        | 1.71%           | 1.318%        |
| 3         | 4.216       | 363           | 439         | 378          | BV       | 78412          | 222740        | 2.31%           | 6.318%        |
| 4         | 5.778       | 445           | 419         | 378          | BV       | 78412          | 244740        | 100.00%         | 90.208%       |
| 5         | 8.674       | 2231          | 2242        | 2275         | BB       | 4497609        | 2094240       | 1.81%           | 1.870%        |

## Area Percent Report

Data File : CH-61.D  
Acq On : 10 Aug 2024 00:52  
Operator :  
Sample : CH-61  
Misc :  
ALS Vial : 1 Sample Multiplier: 1

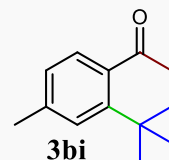

Integration Parameters: autoint1.e  
Integrator: ChemStation

Method : C:\MassHunter\GCMS\3\methods\Method 11\_H2\_CO\_DETECTION.M  
Title :

Signal : TIC: CH-61.D\data.ms

| peak<br># | R.T.<br>min | first<br>scan | max<br>scan | last<br>scan | PK<br>TY | peak<br>height | corr.<br>area | corr.<br>% max. | % of<br>total |
|-----------|-------------|---------------|-------------|--------------|----------|----------------|---------------|-----------------|---------------|
| 1         | 1.316       | 221           | 219         | 378          | BV       | 87712          | 212640        | 0.11%           | 0.785%        |
| 2         | 2.396       | 351           | 429         | 378          | BV       | 78412          | 222740        | 1.71%           | 1.318%        |
| 3         | 4.216       | 363           | 439         | 378          | BV       | 78412          | 222740        | 6.31%           | 7.318%        |
| 4         | 7.778       | 445           | 419         | 378          | BV       | 78412          | 244740        | 100.00%         | 90.088%       |
| 5         | 8.674       | 2231          | 2242        | 2275         | BB       | 4497609        | 2094240       | 1.41%           | 1.570%        |

## Area Percent Report

Data File : CH-62.D  
Acq On : 11 Aug 2024 10:52  
Operator :  
Sample : CH-62  
Misc :  
ALS Vial : 1 Sample Multiplier: 1

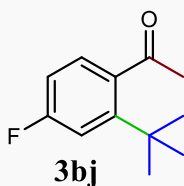

Integration Parameters: autoint1.e  
Integrator: ChemStation

Method : C:\MassHunter\GCMS\3\methods\Method 11\_H2\_CO\_DETECTION.M  
Title :

Signal : TIC: CH-62.D\data.ms

| peak<br># | R.T.<br>min | first<br>scan | max<br>scan | last<br>scan | PK<br>TY | peak<br>height | corr.<br>area | corr.<br>% max. | % of<br>total |
|-----------|-------------|---------------|-------------|--------------|----------|----------------|---------------|-----------------|---------------|
| 1         | 1.316       | 221           | 219         | 378          | BV       | 87712          | 212640        | 0.11%           | 0.785%        |
| 2         | 2.396       | 351           | 429         | 378          | BV       | 78412          | 222740        | 1.71%           | 0.318%        |
| 3         | 4.216       | 363           | 439         | 378          | BV       | 78412          | 222740        | 6.31%           | 8.318%        |
| 4         | 8.178       | 445           | 419         | 378          | BV       | 78412          | 244740        | 100.00%         | 90.088%       |
| 5         | 8.474       | 2231          | 2242        | 2275         | BB       | 4497609        | 2094240       | 1.51%           | 1.670%        |

## Area Percent Report

Data File : CH-63.D  
Acq On : 10 Aug 2024 11:52  
Operator :  
Sample : CH-63  
Misc :  
ALS Vial : 1 Sample Multiplier: 1

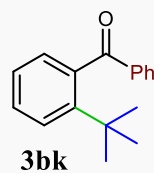

Integration Parameters: autoint1.e  
Integrator: ChemStation

Method : C:\MassHunter\GCMS\3\methods\Method 11\_H2\_CO\_DETECTION.M  
Title :

Signal : TIC: CH-63.D\data.ms

| peak<br># | R.T.<br>min | first<br>scan | max<br>scan | last<br>scan | PK<br>TY | peak<br>height | corr.<br>area | corr.<br>% max. | % of<br>total |
|-----------|-------------|---------------|-------------|--------------|----------|----------------|---------------|-----------------|---------------|
| 1         | 1.316       | 221           | 219         | 378          | BV       | 87712          | 212640        | 0.11%           | 1.785%        |
| 2         | 2.396       | 351           | 429         | 378          | BV       | 78412          | 222740        | 1.71%           | 2.318%        |
| 3         | 4.216       | 363           | 439         | 378          | BV       | 78412          | 222740        | 6.31%           | 6.318%        |
| 4         | 7.578       | 445           | 419         | 378          | BV       | 78412          | 244740        | 100.00%         | 90.088%       |
| 5         | 8.674       | 2231          | 2242        | 2275         | BB       | 4497609        | 2094240       | 1.211%          | 1.370%        |

## Area Percent Report

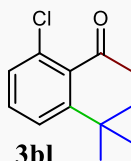

Data File : CH-64.D  
 Acq On : 10 Aug 2024 09:52  
 Operator :  
 Sample : CH-64  
 Misc :  
 ALS Vial : 1 Sample Multiplier: 1

Integration Parameters: autoint1.e  
 Integrator: ChemStation

Method : C:\MassHunter\GCMS\3\methods\Method 11\_H2\_CO\_DETECTION.M  
 Title :

Signal : TIC: CH-64.D\data.ms

| peak<br># | R.T.<br>min | first<br>scan | max<br>scan | last<br>scan | PK<br>TY | peak<br>height | corr.<br>area | corr.<br>% max. | % of<br>total |
|-----------|-------------|---------------|-------------|--------------|----------|----------------|---------------|-----------------|---------------|
| 1         | 1.316       | 221           | 219         | 378          | BV       | 87712          | 212640        | 0.11%           | 1.785%        |
| 2         | 2.396       | 351           | 429         | 378          | BV       | 78412          | 233740        | 1.71%           | 1.318%        |
| 3         | 4.216       | 363           | 439         | 378          | BV       | 78412          | 242740        | 6.31%           | 5.318%        |
| 3         | 6.316       | 363           | 439         | 378          | BV       | 78412          | 2212740       | 5.31%           | 5.318%        |
| 4         | 8.178       | 445           | 419         | 378          | BV       | 78412          | 244740        | 100.00%         | 85.798%       |
| 5         | 8.674       | 2231          | 2242        | 2275         | BB       | 4497609        | 2094240       | 1.311%          | 1.470%        |

## Area Percent Report

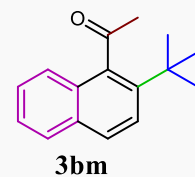

Data File : CH-65.D  
 Acq On : 08 Aug 2024 11:52  
 Operator :  
 Sample : CH-65  
 Misc :  
 ALS Vial : 1 Sample Multiplier: 1

Integration Parameters: autoint1.e  
 Integrator: ChemStation

Method : C:\MassHunter\GCMS\3\methods\Method 11\_H2\_CO\_DETECTION.M  
 Title :

Signal : TIC: CH-65.D\data.ms

| peak<br># | R.T.<br>min | first<br>scan | max<br>scan | last<br>scan | PK<br>TY | peak<br>height | corr.<br>area | corr.<br>% max. | % of<br>total |
|-----------|-------------|---------------|-------------|--------------|----------|----------------|---------------|-----------------|---------------|
| 1         | 1.316       | 221           | 219         | 378          | BV       | 87712          | 212640        | 0.11%           | 0.785%        |
| 2         | 2.396       | 351           | 429         | 378          | BV       | 78412          | 233740        | 1.71%           | 1.318%        |
| 3         | 4.216       | 363           | 439         | 378          | BV       | 78412          | 242740        | 3.31%           | 3.318%        |
| 4         | 8.178       | 445           | 419         | 378          | BV       | 78412          | 244740        | 100.00%         | 95.198%       |
| 5         | 8.674       | 2231          | 2242        | 2275         | BB       | 4497609        | 2094240       | 1.311%          | 1.470%        |

## Area Percent Report

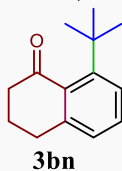

Data File : CH-66.D  
 Acq On : 05 Aug 2024 11:56  
 Operator :  
 Sample : CH-66  
 Misc :  
 ALS Vial : 1 Sample Multiplier: 1

Integration Parameters: autoint1.e  
 Integrator: ChemStation

Method : C:\MassHunter\GCMS\3\methods\Method 11\_H2\_CO\_DETECTION.M  
 Title :

Signal : TIC: CH-65.D\data.ms

| peak<br># | R.T.<br>min | first<br>scan | max<br>scan | last<br>scan | PK<br>TY | peak<br>height | corr.<br>area | corr.<br>% max. | % of<br>total |
|-----------|-------------|---------------|-------------|--------------|----------|----------------|---------------|-----------------|---------------|
| 1         | 1.316       | 221           | 219         | 378          | BV       | 87712          | 212640        | 0.11%           | 1.785%        |
| 2         | 2.396       | 351           | 429         | 378          | BV       | 78412          | 233740        | 1.71%           | 3.318%        |
| 3         | 4.216       | 363           | 439         | 378          | BV       | 78412          | 242740        | 3.31%           | 3.318%        |
| 4         | 7.178       | 445           | 419         | 378          | BV       | 78412          | 244740        | 100.00%         | 92.138%       |
| 5         | 8.674       | 2231          | 2242        | 2275         | BB       | 4497609        | 2094240       | 1.311%          | 1.470%        |

## 10. Computational details

All DFT computations were carried out using the Gaussian 16, Revision C.01 program.<sup>1</sup> All structures were optimized at the B3LYP-D3<sup>2-5</sup> functional with LANL2DZ<sup>6,7</sup> for Co and 6-31G(d,p) basis set for other elements.<sup>8,9</sup> Single point calculations were performed at the PBE1PBE/6-311++G(d,p)<sup>10-12</sup>, def2tzvpp (Co) level of theory and Grimme's dispersion correction<sup>13</sup> with universal solvation model (SMD) in methanol.<sup>14</sup> All transition states are confirmed to be first-order saddle points and optimized at the same level of theory. Intrinsic reaction coordinate (IRC) calculations were also carried out for the key reaction step connecting the reactant and product adducts to obtain the minimum energy path.<sup>15</sup> Optimized structures were illustrated with CYLview20.<sup>16</sup>

NBO analysis was carried out using the NBO 3.1 suite as implemented in Gaussian-16.<sup>17,18</sup> The second-order perturbative estimation of donor–acceptor stabilization energy ( $E_s$ ) was calculated using the following equation,

$$E_s = \Delta E_{ij} = q_i \frac{F_{ij}^2}{\Delta \epsilon_{ji}} \quad (1)$$

where  $q_i$  is the donor orbital occupancy number, and  $F_{ij}$  is the off-diagonal element of the Fock matrix in the NBO basis.  $\Delta \epsilon_{ji} = \epsilon_j - \epsilon_i$  is the orbital energy difference between the acceptor (j) and donor (i) NBO.

The turnover frequency (TOF), turnover-determining intermediate (TDI), transition state (TDTS), and the energetics-determining factors can be obtained from the reaction profile of a computed catalytic cycle.<sup>19-21</sup>

The energetic span of the cycle,  $\partial E$ , can be calculated as;

$$\begin{aligned} \partial E &= T_{\text{TDTS}} - I_{\text{TDI}} \quad (\text{If the TDTS is after the TDI}) \\ \partial E &= T_{\text{TDTS}} - I_{\text{TDI}} + \Delta G_r \quad (\text{If the TDTS is before the TDI}) \end{aligned}$$

$\Delta G_r$  is the global energy of the reaction,

This  $\partial E$  value was used to find the turnover frequency (TOF)<sup>19-21</sup> for each catalytic cycle, using the formula-

$$\text{TOF} \approx (k_B T/h) e^{-\partial E/RT}$$

Where  $k_B$  is the Boltzmann constant,  $T$  is the temperature in kelvin,  $h$  is Planck's constant,  $R$  is the gas constant, and  $\partial E$  is the energy span of the reaction.

**Table S1:** Stability study of possibilities of monomer Co-complexes w.r.t **IN1**.

| Sr. No. | Catalyst structure                                                                                                              | Energy         | Hapticity of fluorenyl |
|---------|---------------------------------------------------------------------------------------------------------------------------------|----------------|------------------------|
| 1.      | 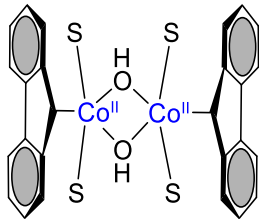 <p>S = Methanol<br/><b>IN2a (now IN1)</b></p> | 0.0 kcal/mol   | $\eta^1$               |
| 2.      |                                                | 221.0 kcal/mol | $\eta^1$               |
| 3.      |                                                | 224.1 kcal/mol | $\eta^5$               |
| 4.      |                                               | 231.0 kcal/mol | endocyclic- $\eta^3$   |
| 5.      |  <p><b>INO</b></p>                           | 381.9 kcal/mol | exocyclic- $\eta^3$    |
| 6.      |                                              | 34.9 kcal/mol  | $\eta^5$               |
| 7.      |                                              | 71.4 kcal/mol  | $\eta^1$               |

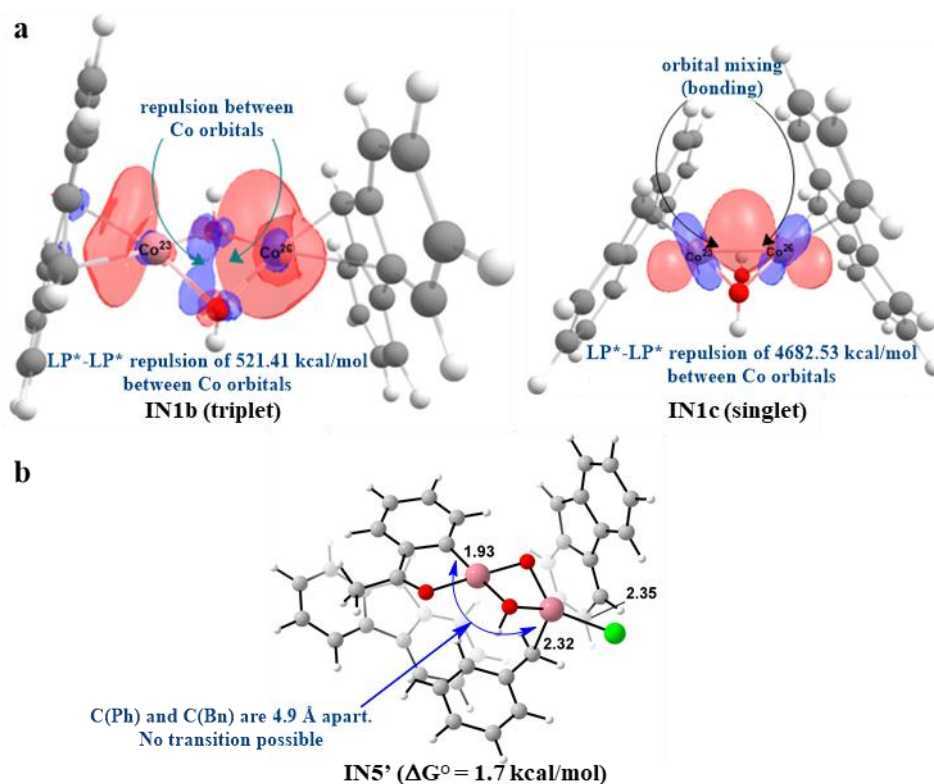

**Figure S15.** (a) NBO diagram for **IN1b** and **IN1c**. Opposite colour lobes in the NBO represent repulsion (isovalue = 0.062). (b) Optimised geometry of **IN5'** (Gibbs free energy given in comparison with **IN1**).

## 11. TOF calculations.

| Experimental                                                                                                                                                                                                                                                                                                                                               | Computational                                                                                                                                                                          |
|------------------------------------------------------------------------------------------------------------------------------------------------------------------------------------------------------------------------------------------------------------------------------------------------------------------------------------------------------------|----------------------------------------------------------------------------------------------------------------------------------------------------------------------------------------|
| $\text{TON} = \frac{\text{moles of substrate}}{\text{moles of catalyst}} \times \% \text{yield}$ <p>for product <b>3s</b>, yield = 98%</p> $\text{TON} = \frac{2.0 \text{ mmol}}{0.05 \text{ mmol}} \times 98\%$ <p><b>TON = 3920</b></p> $\text{TOF} = \frac{\text{TON}}{\text{reaction time}}$ $= \frac{3920}{5}$ <p><b>TOF = 789 h<sup>-1</sup></b></p> | $\text{TOF} = \frac{(k_B T) e^{-\Delta E/RT}}{h}$ $\Delta E = \text{TDTs} - \text{TDI}$ $\Delta E = 22.0 \text{ kcal/mol for } \mathbf{3s},$ <p><b>TOF = 558.01 h<sup>-1</sup></b></p> |

**Figure S16.** Experimental and computational calculations for the formation of **3s**.



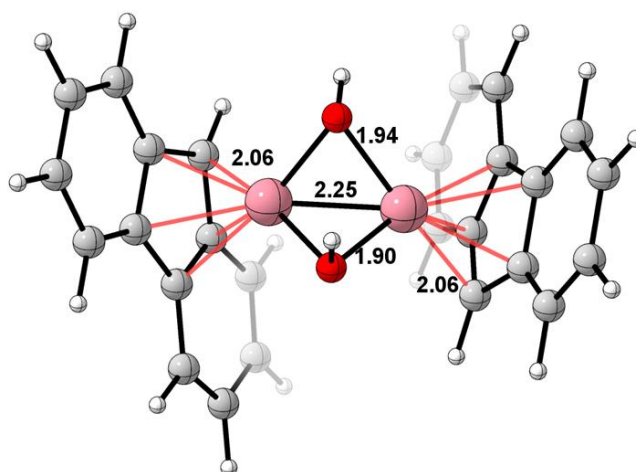

IN1c (singlet)

$\Delta G^\circ = 38.8$  kcal/mol

**Figure S17.** Optimized geometries and Gibbs free energies of singlet Co-complex, **IN1c** (the number of red bonds indicates the hapticity of fluorenyl).

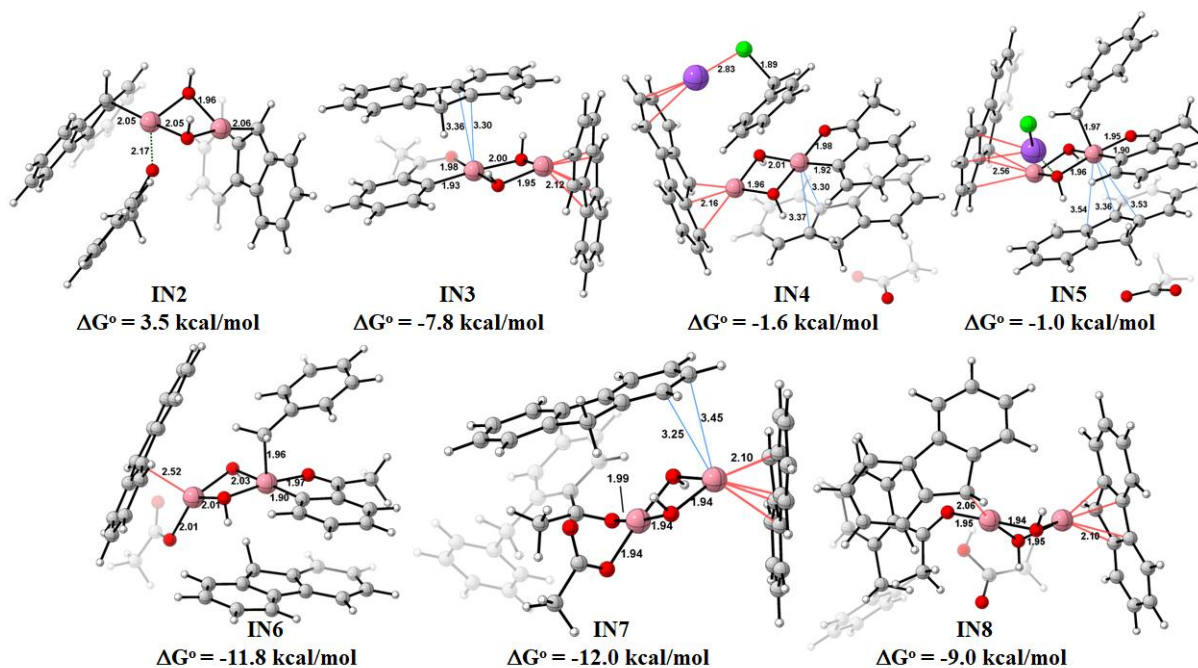

**Figure S18.** Optimized geometries and Gibbs free energies of intermediates (the number of red bonds indicates the hapticity of fluorenyl).



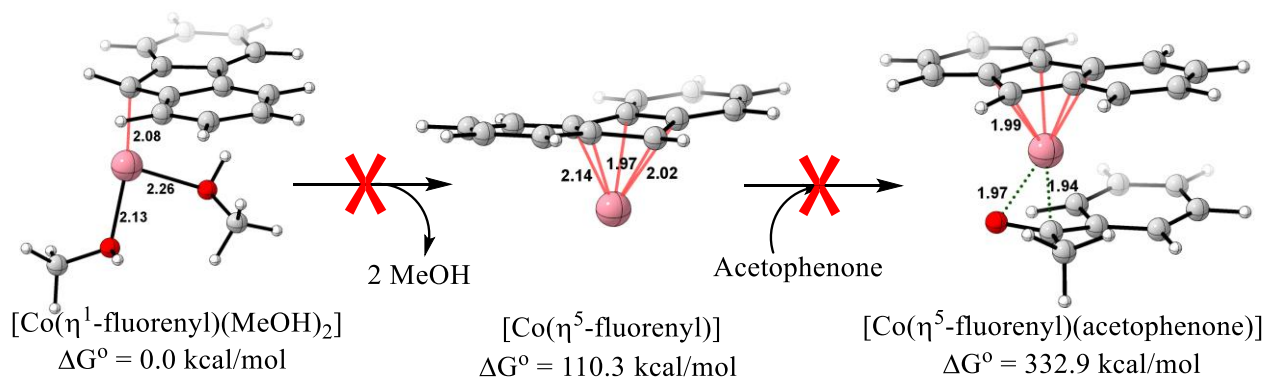

**Figure S19.** DFT study of Co(I)-acetophenone complex formation (the number of red bonds indicates the hapticity of fluorenyl).

Although the  $[\text{Co}(\eta^1\text{-fluorenyl})(\text{MeOH})_2]$  is stable compared to **IN1**, the activation of  $[\text{Co}(\eta^1\text{-fluorenyl})(\text{MeOH})_2]$  to  $[\text{Co}(\eta^5\text{-fluorenyl})]$  requires 110.3 kcal/mol, which is highly unfavourable under the given reaction conditions. Also, the formation of  $[\text{Co}(\eta^5\text{-fluorenyl})(\text{acetophenone})]$  seems highly undesirable as the complex is highly unstable ( $\Delta G^\circ = 332.9 \text{ kcal/mol}$ ) when compared with the  $[\text{Co}(\eta^1\text{-fluorenyl})(\text{MeOH})_2]$  catalyst.

## 12. Comparison between Lanl2tz(f) and def2tzvpp basis sets<sup>22</sup>

Basis set: LANL2TZ(f)

BASIS "ao basis"

Primitive Gaussian functions to contracted  
basis functions

BASIS SET: (5s,5p,5d,1f) to [5s,5p,3d,1f]

s = 1 primitive function

p = 3 primitive functions

d = 5 primitive functions

f = 7 primitive functions

$$\begin{aligned} \text{Total contracted basis functions} &= 5(1) + 5(3) + 3(5) + 1(7) \\ &= 42 \end{aligned}$$

Basis set: def2-TZVPP

BASIS "ao basis"

Primitive Gaussian functions to contracted  
basis functions

BASIS SET: (17s,12p,7d,2f,1g) to [6s,5p,4d,2f,1g]

g = 9 primitive functions

$$\begin{aligned} \text{Total contracted basis functions} &= 6(1) + 5(3) + 4(5) + 2(7) + 1(9) \\ &= 64 \end{aligned}$$

Thus, proving def2tzvpp to be equivalent to lanl2tz(f), if not better.

### 13. Coordinates of Intermediates and Transition states:

#### INO

Energy: -1958.417865 Hartree

Charge: 0

Spin Multiplicity: 2

|    |          |          |          |
|----|----------|----------|----------|
| H  | -1.43498 | -0.97886 | 1.0185   |
| C  | -0.25285 | 3.62341  | -0.62696 |
| C  | -0.49036 | 3.3042   | 0.70935  |
| C  | -0.77591 | 1.98002  | 1.09631  |
| C  | -0.84072 | 0.98457  | 0.09198  |
| C  | -0.55525 | 1.32291  | -1.28589 |
| C  | -0.27593 | 2.63433  | -1.63173 |
| H  | -0.0373  | 4.65206  | -0.90024 |
| H  | -0.46979 | 4.08559  | 1.4629   |
| H  | -1.04342 | 1.75281  | 2.12469  |
| H  | -0.06707 | 2.90254  | -2.66362 |
| C  | -0.90608 | -0.45753 | 0.22489  |
| C  | -0.81157 | -0.9935  | -1.13946 |
| C  | -0.89232 | -2.3054  | -1.60721 |
| C  | -0.74391 | -2.54539 | -2.97696 |
| C  | -0.51594 | -1.49192 | -3.87295 |
| C  | -0.43674 | -0.17234 | -3.41594 |
| C  | -0.58904 | 0.07699  | -2.05308 |
| H  | -1.05934 | -3.12789 | -0.91719 |
| H  | -0.80474 | -3.56318 | -3.35198 |
| H  | -0.40417 | -1.70222 | -4.93261 |
| H  | -0.2683  | 0.64316  | -4.1141  |
| Co | 0.91496  | 0.20585  | 0.94651  |
| O  | 2.35419  | -0.77848 | 1.35603  |
| H  | 2.27149  | -1.30331 | 2.16499  |

#### IN1

Energy: -4379.859869 Hartree

Charge: 0

Spin Multiplicity: 3

|    |          |          |          |
|----|----------|----------|----------|
| H  | 0.22437  | -2.0213  | -2.04464 |
| C  | -0.21407 | -0.13766 | 2.55484  |
| C  | 0.78766  | -1.04189 | 2.1586   |
| C  | 0.93237  | -1.41432 | 0.82095  |
| C  | 0.05233  | -0.88916 | -0.13952 |
| C  | -0.97158 | 0.01887  | 0.27078  |
| C  | -1.09425 | 0.3987   | 1.61281  |
| H  | -0.30053 | 0.14536  | 3.60054  |
| H  | 1.46872  | -1.44528 | 2.90353  |
| H  | 1.72503  | -2.09556 | 0.52674  |
| H  | -1.87219 | 1.09411  | 1.92041  |
| C  | 0.01559  | -1.04551 | -1.60444 |
| C  | -1.18433 | -0.31563 | -2.0262  |
| C  | -1.76872 | -0.1712  | -3.29324 |
| C  | -2.88374 | 0.65699  | -3.44474 |
| C  | -3.42139 | 1.35281  | -2.34626 |
| C  | -2.85597 | 1.21486  | -1.07645 |
| C  | -1.74836 | 0.37532  | -0.91045 |
| H  | -1.34972 | -0.69136 | -4.15225 |
| H  | -3.34063 | 0.76986  | -4.42499 |
| H  | -4.28491 | 1.99742  | -2.48769 |
| H  | -3.27637 | 1.74844  | -0.22686 |
| Co | 1.69746  | 0.0415   | -2.09824 |
| O  | 2.82841  | -1.58478 | -1.99144 |
| O  | 3.43188  | 1.08328  | -2.17526 |
| Co | 4.2499   | -0.40166 | -1.14773 |

|   |         |          |          |                              |          |          |          |
|---|---------|----------|----------|------------------------------|----------|----------|----------|
| C | 4.56306 | 1.22949  | 1.01305  | O                            | 1.6313   | -0.1495  | -4.34492 |
| C | 5.0289  | 0.59255  | 2.2037   | O                            | 5.733    | -1.20045 | -2.71381 |
| C | 5.45922 | 0.89924  | -0.10966 | H                            | 0.97922  | -0.83128 | -4.56323 |
| C | 6.5735  | 0.17007  | 0.51025  | H                            | 5.46403  | -2.12705 | -2.79867 |
| C | 6.29127 | -0.06511 | 1.89     | O                            | 4.37612  | -2.12832 | 0.02357  |
| C | 3.37207 | 1.97284  | 1.05373  | O                            | 1.02279  | 1.9732   | -1.75217 |
| C | 4.30307 | 0.68623  | 3.39724  | C                            | 5.51058  | -3.00842 | 0.13478  |
| H | 5.68131 | 1.66242  | -0.85723 | H                            | 6.14101  | -2.63114 | 0.93801  |
| C | 7.75993 | -0.33111 | -0.04387 | H                            | 5.16878  | -4.0182  | 0.38516  |
| C | 7.17077 | -0.81161 | 2.68331  | H                            | 6.08924  | -3.03629 | -0.79362 |
| C | 2.66631 | 2.07366  | 2.2538   | C                            | 0.11637  | 2.84675  | -2.45019 |
| H | 2.99891 | 2.45938  | 0.15791  | H                            | -0.76553 | 2.27062  | -2.72028 |
| C | 3.1226  | 1.43173  | 3.41883  | H                            | -0.17598 | 3.67375  | -1.79384 |
| H | 4.66022 | 0.19482  | 4.29968  | H                            | 0.58048  | 3.24911  | -3.35523 |
| C | 8.63697 | -1.0637  | 0.75855  | H                            | 1.93751  | 2.30603  | -1.84264 |
| H | 7.98695 | -0.16236 | -1.09396 | H                            | 3.71879  | -2.51751 | -0.59239 |
| C | 8.34396 | -1.31072 | 2.11215  | H                            | 3.75595  | 1.09313  | -3.08641 |
| H | 6.94784 | -0.99572 | 3.73196  |                              |          |          |          |
| H | 1.7433  | 2.64698  | 2.2858   | <b>IN1a</b>                  |          |          |          |
| H | 2.55096 | 1.51575  | 4.33929  | Energy: -4148.685235 Hartree |          |          |          |
| H | 9.55842 | -1.45261 | 0.33165  | Charge: 0                    |          |          |          |
| H | 9.03836 | -1.88796 | 2.71714  | Spin Multiplicity: 3         |          |          |          |
| H | 3.10521 | -1.80085 | -2.89408 | H                            | -0.35147 | -2.1037  | -0.34394 |
| C | 1.33439 | 1.02748  | -5.11278 | C                            | -0.83571 | 2.74943  | 0.89841  |
| H | 0.30086 | 1.35315  | -4.95798 | C                            | -0.21502 | 1.77064  | 1.69778  |
| H | 2.01479 | 1.80745  | -4.76601 | C                            | -0.11203 | 0.44718  | 1.26663  |
| H | 1.506   | 0.85011  | -6.18106 | C                            | -0.64304 | 0.09566  | -0.00128 |
| C | 5.59534 | -0.58344 | -4.00417 | C                            | -1.27795 | 1.10523  | -0.8107  |
| H | 5.91439 | 0.45528  | -3.89394 | C                            | -1.36831 | 2.42302  | -0.3519  |
| H | 6.23629 | -1.07613 | -4.74406 | H                            | -0.90764 | 3.7708   | 1.26176  |
| H | 4.55523 | -0.60798 | -4.35125 | H                            | 0.18392  | 2.0481   | 2.66992  |



|    |          |          |          |
|----|----------|----------|----------|
| C  | -0.84072 | 0.98457  | 0.09198  |
| C  | -0.55525 | 1.32291  | -1.28589 |
| C  | -0.27593 | 2.63433  | -1.63173 |
| H  | -0.0373  | 4.65206  | -0.90024 |
| H  | -0.46979 | 4.08559  | 1.4629   |
| H  | -1.04342 | 1.75281  | 2.12469  |
| H  | -0.06707 | 2.90254  | -2.66362 |
| C  | -0.90608 | -0.45753 | 0.22489  |
| C  | -0.81157 | -0.9935  | -1.13946 |
| C  | -0.89232 | -2.3054  | -1.60721 |
| C  | -0.74391 | -2.54539 | -2.97696 |
| C  | -0.51594 | -1.49192 | -3.87295 |
| C  | -0.43674 | -0.17234 | -3.41594 |
| C  | -0.58904 | 0.07699  | -2.05308 |
| H  | -1.05934 | -3.12789 | -0.91719 |
| H  | -0.80474 | -3.56318 | -3.35198 |
| H  | -0.40417 | -1.70222 | -4.93261 |
| H  | -0.2683  | 0.64316  | -4.11411 |
| Co | 1.0118   | 0.00922  | -0.52088 |
| O  | 2.45104  | -0.97511 | -0.11136 |
| O  | 2.60909  | 0.88082  | -0.48351 |
| Co | 3.90398  | 0.04136  | 0.42564  |
| C  | 4.94242  | -0.34177 | 2.30543  |
| C  | 5.47255  | -1.21435 | 1.27973  |
| C  | 5.0732   | 1.03587  | 1.87346  |
| C  | 5.84376  | 0.99574  | 0.62355  |
| C  | 6.07755  | -0.36092 | 0.25617  |
| C  | 4.20202  | -0.88133 | 3.38454  |
| C  | 5.30602  | -2.585   | 1.38479  |
| H  | 4.82802  | 1.94054  | 2.42374  |
| C  | 6.32055  | 2.02966  | -0.18273 |

|   |         |          |          |
|---|---------|----------|----------|
| C | 6.76974 | -0.67101 | -0.91321 |
| C | 4.05288 | -2.2801  | 3.46134  |
| H | 3.84766 | -0.24507 | 4.19099  |
| C | 4.59979 | -3.11234 | 2.48548  |
| H | 5.70542 | -3.25129 | 0.62526  |
| C | 7.01889 | 1.70901  | -1.35121 |
| H | 6.14464 | 3.06693  | 0.08866  |
| C | 7.23989 | 0.37375  | -1.71562 |
| H | 6.94997 | -1.70518 | -1.19403 |
| H | 3.51634 | -2.71228 | 4.30049  |
| H | 4.4732  | -4.18769 | 2.56846  |
| H | 7.39434 | 2.50628  | -1.98654 |
| H | 7.78524 | 0.14866  | -2.6275  |
| H | 2.46429 | 1.73065  | -0.06112 |
| H | 2.70618 | -1.46968 | -0.8936  |

## IN2

Energy: -4302.076145 Hartree

Charge: 0

Spin Multiplicity: 3

|   |          |         |          |
|---|----------|---------|----------|
| H | -0.47659 | 0.5951  | -2.63156 |
| C | 3.47936  | 2.06196 | -5.30738 |
| C | 2.87813  | 2.82292 | -4.28842 |
| C | 1.85836  | 2.28979 | -3.49795 |
| C | 1.42278  | 0.97745 | -3.73197 |
| C | 2.01946  | 0.2177  | -4.78308 |
| C | 3.05247  | 0.75638 | -5.55785 |
| H | 4.27867  | 2.49504 | -5.90288 |
| H | 3.21768  | 3.84016 | -4.1101  |
| H | 1.42233  | 2.87651 | -2.69386 |
| H | 3.51356  | 0.16857 | -6.34804 |

|    |          |          |          |                               |         |          |          |
|----|----------|----------|----------|-------------------------------|---------|----------|----------|
| C  | 0.44178  | 0.14483  | -3.0186  | C                             | 6.57025 | 1.26415  | -2.20671 |
| C  | 0.38275  | -1.10903 | -3.78225 | H                             | 7.29918 | -0.58011 | -1.34606 |
| C  | -0.38891 | -2.26442 | -3.58893 | H                             | 4.85283 | -2.10262 | 4.50998  |
| C  | -0.17161 | -3.37754 | -4.40566 | H                             | 6.42532 | -3.20599 | 2.94632  |
| C  | 0.80567  | -3.35197 | -5.41506 | H                             | 5.66406 | 3.12142  | -2.82731 |
| C  | 1.58178  | -2.20871 | -5.62266 | H                             | 7.15589 | 1.16519  | -3.11654 |
| C  | 1.37308  | -1.08794 | -4.81315 | H                             | 0.91523 | 1.47926  | 0.15138  |
| H  | -1.14094 | -2.29599 | -2.80336 | H                             | 2.07816 | -3.02908 | -0.88416 |
| H  | -0.76349 | -4.27695 | -4.25658 | C                             | 2.36787 | -3.76724 | -1.62518 |
| H  | 0.96275  | -4.23152 | -6.0333  | C                             | 1.87903 | -5.06852 | -1.5385  |
| H  | 2.33987  | -2.19313 | -6.40217 | C                             | 3.25871 | -3.41145 | -2.65456 |
| Co | 1.3487   | -0.49957 | -1.29259 | C                             | 2.26933 | -6.03085 | -2.47516 |
| O  | 1.61326  | -1.43369 | 0.50938  | H                             | 1.19534 | -5.33464 | -0.73717 |
| O  | 1.72464  | 1.20594  | -0.30841 | C                             | 3.65792 | -4.39034 | -3.58334 |
| Co | 2.7923   | 0.10497  | 0.90619  | C                             | 3.16185 | -5.68961 | -3.49499 |
| C  | 4.85368  | 0.23979  | 2.03445  | H                             | 1.88333 | -7.04424 | -2.40756 |
| C  | 5.76521  | -0.4126  | 1.13101  | H                             | 4.34216 | -4.14101 | -4.3864  |
| C  | 4.30325  | 1.42609  | 1.38891  | H                             | 3.46895 | -6.43435 | -4.22326 |
| C  | 5.04007  | 1.56552  | 0.12881  | C                             | 3.76226 | -2.0179  | -2.74588 |
| C  | 5.89753  | 0.43453  | -0.04812 | C                             | 4.88472 | -1.69574 | -3.69436 |
| C  | 4.51982  | -0.38806 | 3.25405  | H                             | 5.765   | -2.309   | -3.47401 |
| C  | 6.32414  | -1.649   | 1.46038  | H                             | 4.57794 | -1.91726 | -4.72184 |
| H  | 3.92221  | 2.2831   | 1.94057  | H                             | 5.13513 | -0.6393  | -3.61142 |
| C  | 4.95758  | 2.53181  | -0.88358 | O                             | 3.28791 | -1.10366 | -2.05191 |
| C  | 6.65377  | 0.28504  | -1.2145  | H                             | 0.80096 | -1.33369 | 1.02884  |
| C  | 5.09622  | -1.62143 | 3.56628  |                               |         |          |          |
| H  | 3.82989  | 0.09297  | 3.94317  | <b>TS[2-3]</b>                |         |          |          |
| C  | 5.99069  | -2.24622 | 2.68035  | Energy: -4302.046447 Hartree  |         |          |          |
| H  | 7.01021  | -2.14278 | 0.77652  | Imaginary Frequency: -1232.52 |         |          |          |
| C  | 5.72441  | 2.37504  | -2.03998 | Charge: 0                     |         |          |          |
| H  | 4.29683  | 3.38807  | -0.77432 | Spin Multiplicity: 3          |         |          |          |

|    |          |          |          |   |         |          |          |
|----|----------|----------|----------|---|---------|----------|----------|
| H  | 0.21941  | -3.07983 | -1.88285 | C | 3.84906 | 0.50141  | 3.94688  |
| C  | 1.10162  | 0.31774  | 1.72768  | C | 5.51816 | -1.74246 | 3.39121  |
| C  | 1.29888  | -1.07217 | 1.85359  | H | 4.75777 | 2.63481  | 1.99018  |
| C  | 1.04206  | -1.93451 | 0.78838  | C | 7.18734 | 1.87426  | 0.34593  |
| C  | 0.58261  | -1.40503 | -0.4288  | C | 7.75032 | -0.81851 | 1.0777   |
| C  | 0.34436  | 0.0058   | -0.54012 | C | 3.70706 | -0.6884  | 4.63967  |
| C  | 0.61903  | 0.85985  | 0.53391  | H | 3.21317 | 1.35427  | 4.1658   |
| H  | 1.325    | 0.96756  | 2.56827  | C | 4.52796 | -1.81065 | 4.35846  |
| H  | 1.67578  | -1.47073 | 2.7913   | H | 6.15806 | -2.59679 | 3.18712  |
| H  | 1.22698  | -3.00137 | 0.88834  | C | 8.24428 | 1.17881  | -0.22948 |
| H  | 0.46003  | 1.93195  | 0.44115  | H | 6.97071 | 2.89849  | 0.05466  |
| C  | 0.38352  | -2.01732 | -1.72972 | C | 8.52516 | -0.15825 | 0.13033  |
| C  | -0.14    | -0.98337 | -2.5951  | H | 7.96334 | -1.84846 | 1.35137  |
| C  | -0.50178 | -1.00985 | -3.95155 | H | 2.94927 | -0.76935 | 5.41446  |
| C  | -0.85636 | 0.18485  | -4.58622 | H | 4.38175 | -2.72987 | 4.9187   |
| C  | -0.82638 | 1.40859  | -3.89718 | H | 8.86845 | 1.67085  | -0.97086 |
| C  | -0.45206 | 1.45408  | -2.54866 | H | 9.35862 | -0.67339 | -0.3392  |
| C  | -0.12201 | 0.26766  | -1.89279 | H | 3.05854 | 1.5943   | -0.67176 |
| H  | -0.51302 | -1.94807 | -4.50073 | H | 1.91419 | -1.94868 | -2.27885 |
| H  | -1.1478  | 0.16858  | -5.63331 | C | 2.89777 | -2.18859 | -3.02426 |
| H  | -1.09501 | 2.32519  | -4.41536 | C | 3.316   | -3.52933 | -2.87528 |
| H  | -0.42169 | 2.4041   | -2.01962 | C | 2.80812 | -1.66986 | -4.35457 |
| Co | 3.35401  | -0.53203 | -1.82721 | C | 3.60929 | -4.31737 | -3.9825  |
| O  | 4.06753  | -1.50568 | -0.31663 | H | 3.37968 | -3.94975 | -1.87447 |
| O  | 3.86132  | 1.07847  | -0.84585 | C | 3.06404 | -2.48311 | -5.47293 |
| Co | 4.4012   | 0.10092  | 0.75912  | C | 3.46532 | -3.80126 | -5.28434 |
| C  | 4.85112  | 0.60211  | 2.94961  | H | 3.9441  | -5.34263 | -3.84742 |
| C  | 5.69898  | -0.5362  | 2.68194  | H | 2.98511 | -2.07874 | -6.47772 |
| C  | 5.1727   | 1.63444  | 1.99728  | H | 3.67929 | -4.43075 | -6.14302 |
| C  | 6.39801  | 1.23356  | 1.3227   | C | 2.57958 | -0.23319 | -4.45233 |
| C  | 6.68827  | -0.12821 | 1.68578  | C | 2.30941 | 0.46792  | -5.74674 |

|   |         |          |          |
|---|---------|----------|----------|
| H | 3.26739 | 0.63575  | -6.2565  |
| H | 1.67471 | -0.12434 | -6.40791 |
| H | 1.84587 | 1.4358   | -5.54953 |
| O | 2.70456 | 0.4601   | -3.40424 |
| H | 4.91173 | -1.90136 | -0.58137 |

### IN3

Energy: -4302.094146 Hartree

Charge: 0

Spin Multiplicity: 3

|   |          |          |          |
|---|----------|----------|----------|
| H | -0.63023 | -1.84037 | 0.51947  |
| C | 0.96109  | 2.70375  | -0.21007 |
| C | 1.31742  | 1.96277  | 0.92584  |
| C | 1.05915  | 0.5865   | 0.99471  |
| C | 0.433    | -0.03436 | -0.08232 |
| C | 0.06089  | 0.71544  | -1.22053 |
| C | 0.33407  | 2.08443  | -1.29519 |
| H | 1.17447  | 3.76858  | -0.24556 |
| H | 1.80805  | 2.45748  | 1.75717  |
| H | 1.3588   | 0.01992  | 1.87202  |
| H | 0.0588   | 2.65686  | -2.17662 |
| C | 0.04548  | -1.48566 | -0.26907 |
| C | -0.61063 | -1.48429 | -1.63238 |
| C | -1.15573 | -2.54122 | -2.35297 |
| C | -1.69498 | -2.28981 | -3.62167 |
| C | -1.68531 | -0.99605 | -4.15922 |
| C | -1.13156 | 0.06904  | -3.44257 |
| C | -0.59332 | -0.18257 | -2.17843 |
| H | -1.15843 | -3.5483  | -1.94453 |
| H | -2.1206  | -3.10766 | -4.1964  |
| H | -2.10715 | -0.82039 | -5.14508 |

|    |          |          |          |
|----|----------|----------|----------|
| H  | -1.11462 | 1.07058  | -3.86328 |
| Co | 3.15601  | -0.37144 | -1.92474 |
| O  | 3.82136  | -1.211   | -0.3213  |
| O  | 3.90961  | 1.28961  | -1.10648 |
| Co | 4.24848  | 0.44471  | 0.61365  |
| C  | 4.56128  | 1.03391  | 2.75455  |
| C  | 5.27853  | -0.21251 | 2.60211  |
| C  | 5.10141  | 1.97441  | 1.80771  |
| C  | 6.32916  | 1.40177  | 1.27809  |
| C  | 6.41438  | 0.03409  | 1.71413  |
| C  | 3.45377  | 1.09165  | 3.63969  |
| C  | 4.87026  | -1.36259 | 3.31543  |
| H  | 4.80646  | 3.01194  | 1.71233  |
| C  | 7.29079  | 1.90407  | 0.37882  |
| C  | 7.44542  | -0.80012 | 1.25307  |
| C  | 3.08426  | -0.04806 | 4.3311   |
| H  | 2.91815  | 2.02598  | 3.77918  |
| C  | 3.78081  | -1.27411 | 4.16475  |
| H  | 5.41471  | -2.29601 | 3.20118  |
| C  | 8.31425  | 1.06681  | -0.0502  |
| H  | 7.23179  | 2.93294  | 0.03406  |
| C  | 8.39348  | -0.27592 | 0.38053  |
| H  | 7.50269  | -1.83438 | 1.58179  |
| H  | 2.24417  | -0.00733 | 5.01938  |
| H  | 3.4582   | -2.14825 | 4.72337  |
| H  | 9.07016  | 1.45116  | -0.73013 |
| H  | 9.20674  | -0.90341 | 0.02657  |
| H  | 3.23052  | 1.97328  | -1.00546 |
| H  | 0.92428  | -2.14271 | -0.25233 |
| C  | 2.56002  | -1.96939 | -2.8289  |
| C  | 2.56428  | -3.31915 | -2.44648 |



|   |         |          |          |    |          |          |          |
|---|---------|----------|----------|----|----------|----------|----------|
| C | 2.04241 | -1.67615 | -4.12084 | C  | -0.73674 | -1.38595 | 0.00723  |
| C | 2.07046 | -4.31649 | -3.29529 | C  | -1.27454 | -1.12981 | -1.3807  |
| H | 2.95253 | -3.60137 | -1.46932 | C  | -2.04601 | -1.95515 | -2.19149 |
| C | 1.54528 | -2.67084 | -4.98343 | C  | -2.43295 | -1.49232 | -3.45552 |
| C | 1.5614  | -3.99753 | -4.56389 | C  | -2.05642 | -0.21576 | -3.89524 |
| H | 2.07787 | -5.35525 | -2.97121 | C  | -1.2882  | 0.62174  | -3.0799  |
| H | 1.14847 | -2.41231 | -5.96145 | C  | -0.90247 | 0.15877  | -1.81953 |
| H | 1.17921 | -4.78142 | -5.21143 | H  | -2.34347 | -2.9431  | -1.85153 |
| C | 2.05747 | -0.25505 | -4.43857 | H  | -3.03065 | -2.12885 | -4.10201 |
| C | 1.56306 | 0.30338  | -5.73554 | H  | -2.36555 | 0.12695  | -4.8789  |
| H | 2.20843 | -0.04435 | -6.55121 | H  | -0.9942  | 1.61004  | -3.42268 |
| H | 0.55135 | -0.05555 | -5.94463 | Co | 2.53012  | -0.91244 | -1.77698 |
| H | 1.57247 | 1.39428  | -5.70592 | O  | 2.96913  | -1.74848 | -0.0885  |
| O | 2.52858 | 0.53198  | -3.57082 | O  | 3.57204  | 0.65888  | -1.07851 |
| H | 3.13043 | -1.72125 | 0.12459  | Co | 3.91107  | -0.18959 | 0.62791  |

#### IN4

Energy: -5423.452704 Hartree

Charge: 0

Spin Multiplicity: 3

|   |          |          |          |   |         |          |          |
|---|----------|----------|----------|---|---------|----------|----------|
| H | -1.55572 | -1.5586  | 0.71563  | C | 5.21162 | -0.02886 | 2.3399   |
| C | 1.2279   | 2.40234  | 0.43478  | C | 6.4375  | -0.73897 | 2.05501  |
| C | 1.34922  | 1.50281  | 1.50488  | C | 5.17033 | 1.19862  | 1.57158  |
| C | 0.73959  | 0.24128  | 1.44965  | C | 6.47939 | 1.30385  | 0.92962  |
| C | 0.01159  | -0.10847 | 0.31563  | C | 7.25338 | 0.13357  | 1.22187  |
| C | -0.10158 | 0.79384  | -0.76573 | C | 4.17056 | -0.69142 | 3.03426  |
| C | 0.50585  | 2.05283  | -0.71093 | C | 6.61815 | -2.04244 | 2.50031  |
| H | 1.70409  | 3.37705  | 0.49634  | H | 4.57874 | 2.07156  | 1.83353  |
| H | 1.92073  | 1.78646  | 2.38363  | C | 7.03019 | 2.30764  | 0.11988  |
| H | 0.84121  | -0.45311 | 2.27942  | C | 8.55749 | -0.00688 | 0.73473  |
| H | 0.41745  | 2.74746  | -1.54176 | C | 4.38274 | -2.01307 | 3.47107  |
|   |          |          |          | H | 3.25645 | -0.16546 | 3.2966   |
|   |          |          |          | C | 5.58488 | -2.67561 | 3.21334  |
|   |          |          |          | H | 7.54026 | -2.57628 | 2.28481  |
|   |          |          |          | C | 8.33425 | 2.16256  | -0.36424 |
|   |          |          |          | H | 6.45485 | 3.19827  | -0.11887 |

|   |          |          |          |                              |          |          |          |
|---|----------|----------|----------|------------------------------|----------|----------|----------|
| C | 9.10379  | 1.02062  | -0.05218 | H                            | 5.68248  | -0.58038 | -1.26023 |
| H | 9.15119  | -0.88235 | 0.98713  | C                            | 5.56707  | -3.70486 | -3.54633 |
| H | 3.59783  | -2.51857 | 4.02684  | H                            | 5.06258  | -2.33495 | -5.13818 |
| H | 5.72147  | -3.69549 | 3.56105  | C                            | 5.89797  | -3.84365 | -2.19487 |
| H | 8.77224  | 2.94854  | -0.97354 | H                            | 6.19227  | -2.80916 | -0.31521 |
| H | 10.1346  | 0.95365  | -0.39352 | H                            | 5.50575  | -4.58302 | -4.18246 |
| H | 2.98123  | 1.41323  | -0.93124 | H                            | 6.08955  | -4.82922 | -1.78088 |
| H | -0.08481 | -2.26784 | 0.03369  | H                            | 4.57819  | 0.04768  | -4.77099 |
| C | 1.63328  | -2.41326 | -2.5794  | Cl                           | 6.7489   | 0.92203  | -4.24379 |
| C | 1.36852  | -3.70649 | -2.10508 | C                            | -3.96462 | -0.25484 | 0.16594  |
| C | 1.20316  | -2.11891 | -3.9029  | O                            | -4.01941 | -1.43172 | 0.63155  |
| C | 0.69874  | -4.64593 | -2.89685 | O                            | -3.25101 | 0.687    | 0.62058  |
| H | 1.68206  | -3.98543 | -1.1008  | C                            | -4.83828 | 0.07368  | -1.05404 |
| C | 0.53243  | -3.05749 | -4.70946 | H                            | -5.60421 | 0.80591  | -0.77042 |
| C | 0.27902  | -4.32632 | -4.19852 | H                            | -4.22565 | 0.53392  | -1.83631 |
| H | 0.49703  | -5.64007 | -2.50304 | H                            | -5.33056 | -0.81562 | -1.45658 |
| H | 0.20937  | -2.79856 | -5.71419 | Na                           | 8.10429  | -0.30253 | -2.08038 |
| H | -0.24116 | -5.06581 | -4.8005  |                              |          |          |          |
| C | 1.50605  | -0.75778 | -4.3183  | <b>TS[4-5]</b>               |          |          |          |
| C | 1.16585  | -0.21286 | -5.66897 | Energy: -5423.434554 Hartree |          |          |          |
| H | 1.74486  | -0.746   | -6.43278 | Imaginary Frequency: -170.67 |          |          |          |
| H | 0.10687  | -0.37381 | -5.89056 | Charge: 0                    |          |          |          |
| H | 1.39747  | 0.85255  | -5.71594 | Spin Multiplicity: 3         |          |          |          |
| O | 2.10447  | -0.01538 | -3.4912  | H                            | 3.4907   | -2.95925 | 1.47076  |
| H | 2.16125  | -1.96519 | 0.39685  | C                            | 0.59978  | -2.86496 | -2.42557 |
| C | 5.12175  | 0.0598   | -3.82886 | C                            | 0.25762  | -3.59678 | -1.27863 |
| H | 4.64834  | 0.71482  | -3.09978 | C                            | 0.95463  | -3.40701 | -0.07549 |
| C | 5.38265  | -1.30205 | -3.27449 | C                            | 1.99895  | -2.48752 | -0.03749 |
| C | 5.70596  | -1.4513  | -1.91156 | C                            | 2.34483  | -1.75475 | -1.1956  |
| C | 5.31662  | -2.44076 | -4.087   | C                            | 1.64471  | -1.93727 | -2.3926  |
| C | 5.96567  | -2.71372 | -1.37303 | H                            | 0.04562  | -3.02152 | -3.34694 |

|    |          |          |          |   |          |          |          |
|----|----------|----------|----------|---|----------|----------|----------|
| H  | -0.55513 | -4.31576 | -1.32191 | H | -5.90171 | -1.03622 | 2.13621  |
| H  | 0.68308  | -3.97556 | 0.81028  | C | -4.86685 | 0.9799   | -2.86015 |
| H  | 1.91113  | -1.37183 | -3.28142 | H | -3.41276 | -0.39674 | -3.67717 |
| C  | 2.9085   | -2.10329 | 1.10999  | C | -5.68249 | 1.3157   | -1.76518 |
| C  | 3.81193  | -1.06545 | 0.4856   | H | -6.32657 | 0.77394  | 0.2264   |
| C  | 4.86621  | -0.35864 | 1.05428  | H | -3.32044 | -4.43122 | 2.79306  |
| C  | 5.5792   | 0.54846  | 0.26044  | H | -5.07102 | -2.8736  | 3.59534  |
| C  | 5.24132  | 0.73945  | -1.08661 | H | -4.8677  | 1.6164   | -3.74144 |
| C  | 4.1856   | 0.02777  | -1.66474 | H | -6.30314 | 2.2063   | -1.80976 |
| C  | 3.47578  | -0.87763 | -0.87176 | H | -0.58746 | -0.45689 | -2.11449 |
| H  | 5.13592  | -0.50982 | 2.09561  | H | 2.35849  | -1.69912 | 1.96968  |
| H  | 6.40355  | 1.1089   | 0.69236  | C | 1.511    | 1.40438  | 1.26212  |
| H  | 5.80741  | 1.44541  | -1.6879  | C | 1.67688  | 1.18743  | 2.62931  |
| H  | 3.92322  | 0.1765   | -2.70852 | C | 2.34465  | 2.35143  | 0.62088  |
| Co | 0.32996  | 0.55126  | 0.0006   | C | 2.65458  | 1.89732  | 3.33832  |
| O  | -0.48865 | -0.66914 | 1.24517  | H | 1.04986  | 0.46622  | 3.14753  |
| O  | -0.9625  | -0.11488 | -1.29028 | C | 3.32176  | 3.07116  | 1.32893  |
| Co | -1.7316  | -1.4477  | -0.10916 | C | 3.47123  | 2.83823  | 2.69362  |
| C  | -3.68373 | -2.55354 | -0.03065 | H | 2.78373  | 1.72033  | 4.40344  |
| C  | -4.66001 | -1.61212 | 0.46766  | H | 3.95728  | 3.79078  | 0.82121  |
| C  | -3.22999 | -2.12766 | -1.34054 | H | 4.22381  | 3.37998  | 3.25854  |
| C  | -4.05328 | -0.96617 | -1.68991 | C | 2.09795  | 2.47465  | -0.80782 |
| C  | -4.89215 | -0.62826 | -0.58471 | C | 2.81623  | 3.4416   | -1.68655 |
| C  | -3.17537 | -3.55104 | 0.83059  | H | 2.61753  | 4.46217  | -1.34162 |
| C  | -5.15552 | -1.73298 | 1.76279  | H | 3.89556  | 3.27469  | -1.61648 |
| H  | -2.81485 | -2.80083 | -2.08678 | H | 2.48788  | 3.3313   | -2.72096 |
| C  | -4.05088 | -0.1546  | -2.83083 | O | 1.21601  | 1.72055  | -1.3036  |
| C  | -5.69976 | 0.51283  | -0.62246 | H | 0.19706  | -1.29468 | 1.52141  |
| C  | -3.68456 | -3.64781 | 2.13406  | C | -1.37754 | 2.112    | 0.91505  |
| H  | -2.43673 | -4.26157 | 0.46971  | H | -0.93643 | 2.16471  | 1.89782  |
| C  | -4.6757  | -2.76513 | 2.58886  | C | -1.25118 | 3.20042  | 0.00142  |

|                              |          |          |          |    |          |          |          |
|------------------------------|----------|----------|----------|----|----------|----------|----------|
| C                            | -0.45099 | 4.3218   | 0.32733  | C  | 1.62679  | -3.00631 | -1.04743 |
| C                            | -1.87026 | 3.13662  | -1.27104 | H  | 0.64348  | -4.87897 | -0.62439 |
| C                            | -0.26808 | 5.34079  | -0.59822 | H  | 1.17051  | -4.8406  | 1.79815  |
| H                            | 0.02711  | 4.36562  | 1.30116  | H  | 2.50753  | -2.97655 | 2.76685  |
| C                            | -1.68554 | 4.16178  | -2.18847 | H  | 1.39293  | -3.02473 | -2.10868 |
| H                            | -2.47273 | 2.26947  | -1.52347 | C  | 3.52023  | -0.7267  | 1.21046  |
| C                            | -0.88065 | 5.26047  | -1.85697 | C  | 3.57771  | 0.00407  | -0.11071 |
| H                            | 0.35054  | 6.19771  | -0.34928 | C  | 4.21467  | 1.19869  | -0.43263 |
| H                            | -2.16075 | 4.11012  | -3.16351 | C  | 4.15352  | 1.66519  | -1.75122 |
| H                            | -0.73127 | 6.05717  | -2.58014 | C  | 3.46542  | 0.94287  | -2.73701 |
| H                            | -2.01268 | 1.2707   | 0.67696  | C  | 2.83621  | -0.26468 | -2.42428 |
| Cl                           | -3.65569 | 2.66173  | 2.39119  | C  | 2.89925  | -0.73127 | -1.10642 |
| C                            | 5.79571  | -3.55582 | 0.00084  | H  | 4.7516   | 1.76055  | 0.32627  |
| O                            | 5.91466  | -3.59233 | 1.26176  | H  | 4.64534  | 2.59689  | -2.01495 |
| O                            | 4.84988  | -4.06665 | -0.66794 | H  | 3.42979  | 1.32136  | -3.75468 |
| C                            | 6.88157  | -2.82091 | -0.79962 | H  | 2.3217   | -0.83666 | -3.19247 |
| H                            | 7.34848  | -3.51008 | -1.51313 | Co | 0.12832  | 0.72379  | 0.11881  |
| H                            | 6.42212  | -2.01545 | -1.38281 | O  | -0.41902 | -0.89154 | 1.0833   |
| H                            | 7.65329  | -2.39726 | -0.1514  | O  | -0.51359 | -0.16912 | -1.60581 |
| Na                           | -2.27282 | -0.38657 | 3.72842  | Co | -0.9429  | -1.77873 | -0.63567 |
| <b>IN5</b>                   |          |          |          | C  | -3.04858 | -2.99103 | -0.62924 |
| Energy: -5423.451825 Hartree |          |          |          | C  | -3.92627 | -1.99192 | -0.06626 |
| Charge: 0                    |          |          |          | C  | -2.88182 | -2.70627 | -2.03255 |
| Spin Multiplicity: 3         |          |          |          | C  | -3.64541 | -1.52673 | -2.33964 |
| H                            | 4.52985  | -1.00983 | 1.53337  | C  | -4.28613 | -1.06806 | -1.14412 |
| C                            | 1.20771  | -4.04973 | -0.20804 | C  | -2.51801 | -4.0141  | 0.189    |
| C                            | 1.50952  | -4.02932 | 1.16046  | C  | -4.28015 | -2.05114 | 1.27509  |
| C                            | 2.25982  | -2.97911 | 1.7086   | H  | -2.32404 | -3.31157 | -2.7379  |
| C                            | 2.69165  | -1.94696 | 0.87871  | C  | -3.78564 | -0.81014 | -3.53696 |
| C                            | 2.3605   | -1.95036 | -0.49449 | C  | -5.05079 | 0.09058  | -1.15164 |
|                              |          |          |          | C  | -2.86424 | -4.0372  | 1.54336  |

|   |          |          |          |
|---|----------|----------|----------|
| H | -1.85521 | -4.76303 | -0.23257 |
| C | -3.74238 | -3.08028 | 2.07627  |
| H | -4.96942 | -1.32706 | 1.70183  |
| C | -4.56269 | 0.35132  | -3.53375 |
| H | -3.29598 | -1.15077 | -4.44475 |
| C | -5.1853  | 0.79749  | -2.35833 |
| H | -5.52988 | 0.44975  | -0.24546 |
| H | -2.46417 | -4.81479 | 2.18623  |
| H | -4.02033 | -3.13608 | 3.12504  |
| H | -4.68145 | 0.92101  | -4.45049 |
| H | -5.77489 | 1.70905  | -2.37865 |
| H | 0.22425  | -0.26057 | -2.22653 |
| H | 3.07426  | -0.11906 | 2.00577  |
| C | 0.86768  | 1.62378  | 1.61432  |
| C | 0.90647  | 1.28088  | 2.96881  |
| C | 1.51467  | 2.82386  | 1.22335  |
| C | 1.55618  | 2.10583  | 3.89625  |
| H | 0.45335  | 0.35619  | 3.31782  |
| C | 2.1685   | 3.65693  | 2.14767  |
| C | 2.18272  | 3.29354  | 3.49143  |
| H | 1.5794   | 1.82049  | 4.94538  |
| H | 2.65973  | 4.56928  | 1.82132  |
| H | 2.68056  | 3.92295  | 4.22292  |
| C | 1.44756  | 3.07443  | -0.20807 |
| C | 2.02613  | 4.28179  | -0.86601 |
| H | 1.45832  | 5.1622   | -0.54133 |
| H | 3.06559  | 4.42955  | -0.56013 |
| H | 1.96301  | 4.18926  | -1.95088 |
| O | 0.83569  | 2.22334  | -0.90881 |
| H | 0.37458  | -1.30634 | 1.45941  |
| C | -1.65282 | 1.49588  | 0.47607  |

|    |          |          |          |
|----|----------|----------|----------|
| H  | -1.75451 | 1.65554  | 1.55324  |
| C  | -1.89394 | 2.74817  | -0.27209 |
| C  | -1.68931 | 4.00188  | 0.33378  |
| C  | -2.28361 | 2.71777  | -1.62443 |
| C  | -1.85623 | 5.18328  | -0.38979 |
| H  | -1.3854  | 4.04221  | 1.3768   |
| C  | -2.45733 | 3.89805  | -2.34637 |
| H  | -2.43606 | 1.7584   | -2.10792 |
| C  | -2.23875 | 5.13722  | -1.73475 |
| H  | -1.69081 | 6.14142  | 0.09628  |
| H  | -2.76544 | 3.85117  | -3.38788 |
| H  | -2.37081 | 6.05715  | -2.29769 |
| H  | -2.29358 | 0.67816  | 0.1266   |
| Cl | -3.22654 | 0.43193  | 4.55926  |
| C  | 6.30328  | -1.73268 | -0.62978 |
| O  | 6.7505   | -0.96692 | 0.2747   |
| O  | 5.61197  | -2.77609 | -0.4398  |
| C  | 6.58858  | -1.35204 | -2.08991 |
| H  | 6.89958  | -2.23247 | -2.66248 |
| H  | 5.66428  | -0.97813 | -2.54583 |
| H  | 7.35274  | -0.5738  | -2.16775 |
| Na | -2.06568 | -0.54844 | 2.53845  |

# IN6

Energy: -4801.154161 Hartree

Charge: 0

Spin Multiplicity: 3

|   |          |          |         |
|---|----------|----------|---------|
| H | -0.35487 | -3.17196 | 2.28431 |
| C | -4.98635 | -2.73291 | 0.84146 |
| C | -4.53557 | -2.17538 | 2.04556 |
| C | -3.16488 | -2.09658 | 2.32708 |

|    |          |          |          |   |          |          |          |
|----|----------|----------|----------|---|----------|----------|----------|
| C  | -2.25852 | -2.58307 | 1.39132  | C | 4.62171  | -2.17608 | -1.84381 |
| C  | -2.71212 | -3.13242 | 0.17213  | H | 4.90875  | -2.06393 | 0.3012   |
| C  | -4.07849 | -3.2143  | -0.10654 | C | 4.24518  | -1.48702 | -3.00615 |
| H  | -6.05282 | -2.784   | 0.63976  | H | 3.58335  | 0.38942  | -3.86872 |
| H  | -5.25539 | -1.80067 | 2.76786  | C | 2.89153  | 4.26707  | -0.01122 |
| H  | -2.81819 | -1.65904 | 3.25989  | H | 3.44869  | 3.25132  | 1.81913  |
| H  | -4.42927 | -3.63091 | -1.0465  | C | 2.75094  | 4.16736  | -1.40327 |
| C  | -0.74803 | -2.59587 | 1.43741  | H | 2.94125  | 2.90984  | -3.15925 |
| C  | -0.3757  | -3.19736 | 0.09995  | H | 4.89598  | -3.22505 | -1.90755 |
| C  | 0.88372  | -3.40601 | -0.45935 | H | 4.23149  | -2.01131 | -3.95741 |
| C  | 0.9705   | -3.91646 | -1.76187 | H | 2.63197  | 5.19575  | 0.48821  |
| C  | -0.18844 | -4.22447 | -2.48724 | H | 2.38595  | 5.02154  | -1.96632 |
| C  | -1.45377 | -4.02415 | -1.92769 | H | 0.1379   | 0.8206   | 2.55108  |
| C  | -1.54245 | -3.50523 | -0.63309 | H | -0.34727 | -1.57953 | 1.54638  |
| H  | 1.78019  | -3.15626 | 0.09914  | C | -2.04856 | 0.11659  | -1.10018 |
| H  | 1.94727  | -4.06549 | -2.21395 | C | -1.92612 | -0.4555  | -2.37097 |
| H  | -0.10257 | -4.61721 | -3.49678 | C | -3.35976 | 0.38766  | -0.62957 |
| H  | -2.35188 | -4.25046 | -2.49586 | C | -3.06186 | -0.76203 | -3.12895 |
| Co | -0.73143 | 0.60598  | 0.17842  | H | -0.94122 | -0.67449 | -2.77657 |
| O  | 0.76894  | -0.21923 | -0.68255 | C | -4.50582 | 0.09057  | -1.38906 |
| O  | 0.53178  | 1.05984  | 1.69997  | C | -4.35099 | -0.48976 | -2.6441  |
| Co | 1.84219  | -0.25528 | 1.0205   | H | -2.94758 | -1.21939 | -4.10931 |
| C  | 4.28126  | -0.1732  | -0.54817 | H | -5.4986  | 0.30338  | -1.00281 |
| C  | 3.89677  | 0.5262   | -1.73895 | H | -5.22194 | -0.73329 | -3.24546 |
| C  | 4.12834  | 0.71788  | 0.57706  | C | -3.385   | 0.98936  | 0.69368  |
| C  | 3.67736  | 1.99138  | 0.07241  | C | -4.63992 | 1.39377  | 1.39563  |
| C  | 3.52426  | 1.89187  | -1.3484  | H | -5.07011 | 2.25679  | 0.87288  |
| C  | 4.64296  | -1.52829 | -0.60522 | H | -5.3782  | 0.58799  | 1.36997  |
| C  | 3.88039  | -0.12923 | -2.96136 | H | -4.42223 | 1.67175  | 2.4282   |
| C  | 3.35226  | 3.18176  | 0.73939  | O | -2.2732  | 1.20474  | 1.24841  |
| C  | 3.06458  | 2.97633  | -2.08188 | H | 0.52059  | -1.09516 | -1.01247 |

|                              |          |          |          |    |          |          |          |
|------------------------------|----------|----------|----------|----|----------|----------|----------|
| C                            | -0.3539  | 2.27758  | -0.78149 | C  | -2.18331 | 3.10102  | -2.09321 |
| C                            | -1.23568 | 3.37515  | -0.33523 | C  | -1.6757  | 2.82246  | -0.82692 |
| C                            | -2.42335 | 3.68656  | -1.02409 | C  | -2.44273 | 3.08629  | 0.32734  |
| C                            | -0.94004 | 4.10151  | 0.83511  | C  | -3.72774 | 3.62894  | 0.21809  |
| C                            | -3.28997 | 4.67392  | -0.55349 | H  | -5.22764 | 4.33147  | -1.15808 |
| H                            | -2.66989 | 3.13403  | -1.92721 | H  | -3.87325 | 3.87645  | -3.18227 |
| C                            | -1.80214 | 5.09205  | 1.30409  | H  | -1.59795 | 2.88261  | -2.98273 |
| H                            | -0.03133 | 3.86303  | 1.38154  | H  | -4.32217 | 3.82778  | 1.10585  |
| C                            | -2.98577 | 5.38002  | 0.61553  | C  | -0.37138 | 2.19445  | -0.43707 |
| H                            | -4.20375 | 4.89501  | -1.09966 | C  | -0.40163 | 2.20969  | 1.07317  |
| H                            | -1.55258 | 5.64095  | 2.2089   | C  | 0.60784  | 1.96965  | 2.00582  |
| H                            | -3.66005 | 6.1493   | 0.98213  | C  | 0.32807  | 2.12651  | 3.36799  |
| H                            | 0.68629  | 2.42333  | -0.48693 | C  | -0.93427 | 2.55915  | 3.79677  |
| C                            | 3.04044  | -1.62503 | 3.12188  | C  | -1.92268 | 2.88356  | 2.86441  |
| O                            | 2.47595  | -1.89603 | 1.98987  | C  | -1.64757 | 2.72691  | 1.50358  |
| O                            | 3.10713  | -0.47143 | 3.59863  | H  | 1.60503  | 1.68701  | 1.68337  |
| C                            | 3.65281  | -2.80818 | 3.84477  | H  | 1.10562  | 1.92189  | 4.09898  |
| H                            | 4.52718  | -3.1538  | 3.28108  | H  | -1.13493 | 2.67083  | 4.85872  |
| H                            | 3.96358  | -2.53506 | 4.85484  | H  | -2.88629 | 3.26616  | 3.18988  |
| H                            | 2.93921  | -3.63671 | 3.88287  | Co | -0.60892 | -0.09061 | -0.54683 |
| H                            | -0.42254 | 2.07478  | -1.85203 | O  | 1.11213  | -0.49945 | 0.33777  |
| H                            | 4.41648  | 0.50682  | 1.60113  | O  | 0.69577  | -0.19734 | -2.31825 |
| <b>TS[6-7]</b>               |          |          |          | Co | 2.2403   | 0.26578  | -1.11102 |
| Energy: -4801.123586 Hartree |          |          |          | C  | 4.72197  | -0.472   | 0.09051  |
| Imaginary Frequency: -327.02 |          |          |          | C  | 4.29954  | -1.2689  | 1.20498  |
| Charge: 0                    |          |          |          | C  | 4.2704   | -1.10743 | -1.12328 |
| Spin Multiplicity: 3         |          |          |          | C  | 3.59386  | -2.32873 | -0.75766 |
| H                            | 0.63533  | 2.87181  | -0.73746 | C  | 3.59304  | -2.43975 | 0.66956  |
| C                            | -4.23179 | 3.90923  | -1.05382 | C  | 5.38523  | 0.74779  | 0.29683  |
| C                            | -3.46444 | 3.65099  | -2.20105 | C  | 4.54513  | -0.84186 | 2.50213  |
|                              |          |          |          | H  | 4.54351  | -0.81445 | -2.13015 |

|   |          |          |          |                              |          |          |          |
|---|----------|----------|----------|------------------------------|----------|----------|----------|
| C | 2.92414  | -3.27511 | -1.54567 | O                            | -2.33223 | 0.06944  | -1.57212 |
| C | 2.93608  | -3.49178 | 1.28986  | H                            | 1.18892  | -0.10857 | 1.21594  |
| C | 5.62907  | 1.16278  | 1.60859  | C                            | -1.07589 | -2.19297 | -0.09734 |
| H | 5.68142  | 1.36009  | -0.55004 | C                            | -2.30857 | -2.95745 | -0.37734 |
| C | 5.21371  | 0.3803   | 2.6964   | C                            | -2.99662 | -3.62967 | 0.65127  |
| H | 4.22462  | -1.43345 | 3.35519  | C                            | -2.84818 | -3.00332 | -1.67619 |
| C | 2.26149  | -4.32841 | -0.90839 | C                            | -4.18058 | -4.31769 | 0.39123  |
| H | 2.90725  | -3.1776  | -2.6275  | H                            | -2.59939 | -3.59434 | 1.66237  |
| C | 2.26859  | -4.43674 | 0.48999  | C                            | -4.03507 | -3.68922 | -1.93728 |
| H | 2.92351  | -3.58282 | 2.37242  | H                            | -2.33266 | -2.48338 | -2.47878 |
| H | 6.14033  | 2.10381  | 1.78954  | C                            | -4.70996 | -4.34679 | -0.90414 |
| H | 5.40939  | 0.72481  | 3.70786  | H                            | -4.69487 | -4.83042 | 1.20012  |
| H | 1.7336   | -5.07003 | -1.50066 | H                            | -4.43336 | -3.7108  | -2.94846 |
| H | 1.74616  | -5.26246 | 0.96454  | H                            | -5.63495 | -4.87996 | -1.10612 |
| H | 0.51999  | 0.46054  | -3.00582 | H                            | -0.40388 | -2.20639 | -0.96392 |
| H | -0.00522 | 1.43327  | -1.14182 | C                            | 3.13796  | 2.52542  | -1.89196 |
| C | -1.88855 | -0.57201 | 0.96194  | O                            | 2.48284  | 2.43238  | -0.79747 |
| C | -1.65495 | -0.80019 | 2.33181  | O                            | 3.37196  | 1.48328  | -2.57941 |
| C | -3.21637 | -0.24957 | 0.55571  | C                            | 3.59228  | 3.88257  | -2.36298 |
| C | -2.69615 | -0.71612 | 3.24802  | H                            | 4.08697  | 4.41219  | -1.54352 |
| H | -0.65182 | -1.04221 | 2.67232  | H                            | 4.26524  | 3.80212  | -3.21815 |
| C | -4.27204 | -0.19292 | 1.48973  | H                            | 2.71092  | 4.46783  | -2.64943 |
| C | -4.0122  | -0.41972 | 2.83236  | H                            | -0.52456 | -2.52217 | 0.77718  |
| H | -2.49521 | -0.87757 | 4.30462  |                              |          |          |          |
| H | -5.2791  | 0.04783  | 1.16042  | <b>IN7</b>                   |          |          |          |
| H | -4.81372 | -0.36828 | 3.56319  | Energy: -4801.154526 Hartree |          |          |          |
| C | -3.37458 | 0.00764  | -0.85845 | Charge: 0                    |          |          |          |
| C | -4.71181 | 0.18383  | -1.50971 | Spin Multiplicity: 3         |          |          |          |
| H | -5.35505 | -0.67568 | -1.29524 | H                            | -3.80834 | 0.96267  | -2.93622 |
| H | -5.20461 | 1.07654  | -1.11007 | C                            | -6.98879 | -0.33303 | 0.7619   |
| H | -4.58992 | 0.29455  | -2.5883  | C                            | -6.80879 | -1.04759 | -0.44906 |



|    |          |          |          |   |          |          |          |
|----|----------|----------|----------|---|----------|----------|----------|
| C  | -5.92672 | -0.60809 | -1.42199 | C | 1.2895   | -4.02716 | 1.69385  |
| C  | -5.19808 | 0.5891   | -1.20438 | C | 2.22816  | -3.19129 | -0.84091 |
| C  | -5.39023 | 1.31524  | 0.03018  | C | -2.77948 | -2.18939 | -2.45651 |
| C  | -6.29029 | 0.83878  | 1.00649  | H | -3.62106 | -2.77323 | -0.55007 |
| H  | -7.68922 | -0.70933 | 1.50229  | C | -1.61502 | -2.01362 | -3.21463 |
| H  | -7.38    | -1.95688 | -0.6168  | H | 0.54343  | -2.16759 | -3.25769 |
| H  | -5.80611 | -1.15717 | -2.35076 | C | 2.65736  | -4.05581 | 1.39163  |
| H  | -6.43528 | 1.39181  | 1.93056  | H | 0.93506  | -4.34183 | 2.6718   |
| C  | -4.13017 | 1.22618  | -1.93647 | C | 3.12095  | -3.64175 | 0.13557  |
| C  | -3.84585 | 2.49057  | -1.27271 | H | 2.5895   | -2.86116 | -1.81037 |
| C  | -2.9322  | 3.52064  | -1.57236 | H | -3.74403 | -1.95657 | -2.89519 |
| C  | -2.76189 | 4.55715  | -0.66019 | H | -1.68908 | -1.64582 | -4.23456 |
| C  | -3.47181 | 4.58459  | 0.5597   | H | 3.36663  | -4.3978  | 2.14043  |
| C  | -4.36914 | 3.5704   | 0.88319  | H | 4.18605  | -3.66273 | -0.07904 |
| C  | -4.56812 | 2.52414  | -0.03029 | H | -2.55308 | -0.84687 | 1.81046  |
| H  | -2.37216 | 3.50139  | -2.50354 | H | -1.01181 | 1.15577  | -1.23769 |
| H  | -2.07017 | 5.36357  | -0.88969 | C | 2.35449  | 0.15712  | -2.06596 |
| H  | -3.3168  | 5.40869  | 1.25042  | C | 3.03262  | -0.00155 | -3.2683  |
| H  | -4.91124 | 3.58726  | 1.82497  | C | 4.42937  | -0.04236 | -3.26144 |
| Co | -3.16459 | 0.43553  | -0.24768 | C | 5.13026  | 0.0929   | -2.06278 |
| O  | -1.29072 | 0.37175  | -0.74179 | C | 4.4711   | 0.24051  | -0.83535 |
| O  | -2.49833 | 0.0874   | 1.56174  | C | 3.05667  | 0.25362  | -0.84637 |
| Co | -0.65625 | 0.48835  | 1.08826  | H | 1.26981  | 0.161    | -2.04355 |
| C  | -1.46618 | -2.95538 | -0.5925  | H | 2.47993  | -0.0978  | -4.19799 |
| C  | -0.29312 | -2.78084 | -1.35952 | H | 4.97674  | -0.16952 | -4.19129 |
| C  | -1.11283 | -3.47314 | 0.78424  | H | 6.21563  | 0.09553  | -2.08039 |
| C  | 0.3944   | -3.59084 | 0.72188  | C | 2.19801  | 0.27497  | 0.36258  |
| C  | 0.86215  | -3.17264 | -0.54311 | O | 1.11825  | 0.89464  | 0.28402  |
| C  | -2.71258 | -2.65653 | -1.13584 | C | 5.29198  | 0.41905  | 0.43825  |
| C  | -0.36096 | -2.30619 | -2.67188 | H | 4.68568  | 0.91059  | 1.20313  |
| H  | -1.59422 | -4.43569 | 1.00018  | H | 5.55347  | -0.57049 | 0.83286  |

|                              |          |          |          |    |          |          |          |
|------------------------------|----------|----------|----------|----|----------|----------|----------|
| C                            | 6.55799  | 1.22948  | 0.24031  | C  | 6.71757  | 1.68482  | -0.42959 |
| C                            | 7.81876  | 0.62093  | 0.25401  | C  | 5.86625  | 1.26461  | -1.43689 |
| C                            | 6.47972  | 2.61401  | 0.02584  | C  | 5.26302  | -0.01566 | -1.34142 |
| C                            | 8.97906  | 1.37716  | 0.05915  | C  | 5.54514  | -0.84489 | -0.1916  |
| H                            | 7.89264  | -0.45127 | 0.41909  | C  | 6.41344  | -0.38641 | 0.8225   |
| C                            | 7.63488  | 3.37178  | -0.16763 | H  | 7.66198  | 1.23229  | 1.46823  |
| H                            | 5.5048   | 3.09596  | 0.00985  | H  | 7.19457  | 2.65852  | -0.50362 |
| C                            | 8.89031  | 2.75436  | -0.15232 | H  | 5.67496  | 1.89086  | -2.30334 |
| H                            | 9.94988  | 0.88888  | 0.07402  | H  | 6.62988  | -1.01649 | 1.68085  |
| H                            | 7.55727  | 4.44373  | -0.32932 | C  | 4.25073  | -0.67345 | -2.1289  |
| H                            | 9.7907   | 3.34375  | -0.30279 | C  | 4.10637  | -2.0246  | -1.60745 |
| C                            | -0.05298 | -0.27972 | 3.70238  | C  | 3.295    | -3.10283 | -2.01296 |
| O                            | -0.10112 | 0.75162  | 2.92629  | C  | 3.24952  | -4.24634 | -1.22207 |
| O                            | -0.31147 | -1.44723 | 3.34106  | C  | 3.983    | -4.3359  | -0.01923 |
| C                            | 0.40885  | -0.00581 | 5.12164  | C  | 4.7781   | -3.27662 | 0.41007  |
| H                            | 0.11679  | 0.99475  | 5.4496   | C  | 4.85217  | -2.12037 | -0.3815  |
| H                            | 0.0114   | -0.75896 | 5.8059   | H  | 2.71788  | -3.03796 | -2.93154 |
| H                            | 1.50396  | -0.06539 | 5.14714  | H  | 2.63894  | -5.08931 | -1.5352  |
| C                            | 2.52331  | -0.51515 | 1.59226  | H  | 3.9272   | -5.24392 | 0.57455  |
| H                            | 3.40447  | -1.14048 | 1.48058  | H  | 5.33701  | -3.342   | 1.33972  |
| H                            | 2.65196  | 0.17056  | 2.43645  | Co | 3.26917  | -0.18533 | -0.33963 |
| H                            | 1.65977  | -1.14618 | 1.81879  | O  | 1.38713  | -0.23569 | -0.79595 |
| H                            | -1.4211  | -2.78207 | 1.57688  | O  | 2.61933  | -0.06813 | 1.50884  |
| <b>TS[7-8]</b>               |          |          |          | Co | 0.85239  | -0.71624 | 1.00372  |
| Energy: -4801.135008 Hartree |          |          |          | C  | 0.89034  | 2.98526  | 0.03911  |
| Imaginary Frequency: -270.39 |          |          |          | C  | -0.15806 | 2.82896  | -0.89789 |
| Charge: 0                    |          |          |          | C  | 0.31519  | 3.1585   | 1.4143   |
| Spin Multiplicity: 3         |          |          |          | C  | -1.1672  | 3.19396  | 1.17874  |
| H                            | 3.87834  | -0.3318  | -3.08677 | C  | -1.43764 | 2.95085  | -0.18816 |
| C                            | 6.98816  | 0.86794  | 0.69783  | C  | 2.21896  | 2.96433  | -0.37964 |
|                              |          |          |          | C  | 0.12144  | 2.62815  | -2.25264 |

|   |          |          |          |                              |           |          |          |
|---|----------|----------|----------|------------------------------|-----------|----------|----------|
| H | 0.7257   | 3.98304  | 2.00247  | H                            | -5.13134  | 0.22946  | 0.91917  |
| C | -2.21013 | 3.39795  | 2.07798  | C                            | -6.4824   | -1.19913 | 0.07969  |
| C | -2.75475 | 2.88491  | -0.65171 | C                            | -7.58316  | -0.34276 | 0.20697  |
| C | 2.49457  | 2.78936  | -1.74241 | C                            | -6.70351  | -2.5267  | -0.31629 |
| H | 3.03077  | 3.07683  | 0.33471  | C                            | -8.87862  | -0.80062 | -0.05209 |
| C | 1.45567  | 2.61351  | -2.66734 | H                            | -7.42361  | 0.68908  | 0.51117  |
| H | -0.68396 | 2.49685  | -2.96992 | C                            | -7.99485  | -2.98771 | -0.57501 |
| C | -3.52879 | 3.34911  | 1.60831  | H                            | -5.85542  | -3.19936 | -0.42174 |
| H | -2.00583 | 3.58545  | 3.12904  | C                            | -9.08786  | -2.1245  | -0.444   |
| C | -3.79786 | 3.08585  | 0.25709  | H                            | -9.72173  | -0.123   | 0.05355  |
| H | -2.96585 | 2.67763  | -1.69673 | H                            | -8.14972  | -4.02016 | -0.87714 |
| H | 3.52481  | 2.77985  | -2.08271 | H                            | -10.09395 | -2.48293 | -0.64412 |
| H | 1.6925   | 2.46773  | -3.7179  | C                            | 0.29691   | -0.63753 | 3.7862   |
| H | -4.35236 | 3.50796  | 2.29916  | O                            | 0.42126   | -1.4074  | 2.75808  |
| H | -4.82711 | 3.03723  | -0.08778 | O                            | 0.38779   | 0.60866  | 3.76148  |
| H | 2.5236   | 0.85942  | 1.77302  | C                            | -0.02853  | -1.35402 | 5.08443  |
| H | 1.17846  | -0.97196 | -1.39006 | H                            | 0.59048   | -2.24886 | 5.19519  |
| C | -2.10794 | -0.31631 | -2.10107 | H                            | 0.11176   | -0.69181 | 5.94096  |
| C | -2.76464 | -0.00537 | -3.2858  | H                            | -1.0759   | -1.67727 | 5.05442  |
| C | -4.15798 | 0.08212  | -3.28664 | C                            | -2.33817  | -0.08604 | 1.62448  |
| C | -4.8775  | -0.15359 | -2.11382 | H                            | -3.12457  | 0.65988  | 1.55059  |
| C | -4.24081 | -0.45529 | -0.90393 | H                            | -2.65874  | -0.88606 | 2.30262  |
| C | -2.8249  | -0.52393 | -0.90447 | H                            | -1.44508  | 0.36855  | 2.05454  |
| H | -1.02452 | -0.34706 | -2.06992 | H                            | 0.59447   | 2.02675  | 2.18211  |
| H | -2.19655 | 0.17596  | -4.19319 |                              |           |          |          |
| H | -4.69044 | 0.32949  | -4.20086 | <b>IN8</b>                   |           |          |          |
| H | -5.9609  | -0.10588 | -2.14099 | Energy: -4801.149725 Hartree |           |          |          |
| C | -1.97715 | -0.68698 | 0.30125  | Charge: 0                    |           |          |          |
| O | -0.87779 | -1.26397 | 0.16218  | Spin Multiplicity: 3         |           |          |          |
| C | -5.07647 | -0.70469 | 0.34772  | H                            | -2.88666  | -2.35953 | 2.24838  |
| H | -4.56565 | -1.43043 | 0.98686  | C                            | -6.17477  | 1.20467  | 0.86465  |

|    |          |          |          |   |          |          |          |
|----|----------|----------|----------|---|----------|----------|----------|
| C  | -5.37842 | 1.2354   | 2.03974  | H | -1.72957 | 2.78199  | -2.20335 |
| C  | -4.51172 | 0.20358  | 2.35207  | C | 1.13163  | 3.31444  | -2.88571 |
| C  | -4.44073 | -0.92274 | 1.48957  | C | 2.11368  | 4.6256   | -0.57882 |
| C  | -5.25405 | -0.94925 | 0.2937   | C | -2.415   | 3.46029  | 2.05574  |
| C  | -6.11903 | 0.1282   | -0.00409 | H | -3.26435 | 2.4525   | 0.34393  |
| H  | -6.83855 | 2.03782  | 0.65175  | C | -1.30869 | 4.14678  | 2.5855   |
| H  | -5.45226 | 2.0917   | 2.70423  | H | 0.67238  | 4.92525  | 2.20487  |
| H  | -3.89824 | 0.24001  | 3.24793  | C | 2.39667  | 3.90767  | -2.88395 |
| H  | -6.73564 | 0.10069  | -0.89844 | H | 0.76735  | 2.80316  | -3.77428 |
| C  | -3.56672 | -2.06661 | 1.45831  | C | 2.89041  | 4.55325  | -1.73652 |
| C  | -4.0329  | -2.93902 | 0.38987  | H | 2.49343  | 5.12616  | 0.30871  |
| C  | -3.60584 | -4.21012 | -0.03794 | H | -3.28335 | 3.27678  | 2.68265  |
| C  | -4.1786  | -4.76567 | -1.17835 | H | -1.33078 | 4.48871  | 3.61694  |
| C  | -5.16025 | -4.07218 | -1.91684 | H | 3.00976  | 3.86815  | -3.7811  |
| C  | -5.58786 | -2.80731 | -1.52029 | H | 3.88027  | 5.00165  | -1.7541  |
| C  | -5.03679 | -2.23805 | -0.36327 | H | -3.20889 | 1.14752  | -1.60865 |
| H  | -2.84759 | -4.7495  | 0.52266  | H | -0.87577 | -1.71701 | -0.9842  |
| H  | -3.86665 | -5.75393 | -1.50638 | C | 3.10787  | 1.88832  | 1.23277  |
| H  | -5.58916 | -4.53368 | -2.80201 | C | 4.17779  | 2.25097  | 2.04051  |
| H  | -6.34364 | -2.27242 | -2.08952 | C | 5.37805  | 1.5463   | 1.9334   |
| Co | -2.9424  | -0.80361 | -0.10454 | C | 5.48479  | 0.48043  | 1.04059  |
| O  | -1.02582 | -1.11854 | -0.23726 | C | 4.42438  | 0.09687  | 0.20783  |
| O  | -2.61364 | 0.38404  | -1.60925 | C | 3.21684  | 0.83831  | 0.29671  |
| Co | -0.84364 | 0.76114  | -0.91104 | H | 2.1723   | 2.43065  | 1.29758  |
| C  | -1.28894 | 3.24048  | -0.07181 | H | 4.07748  | 3.07505  | 2.74056  |
| C  | -0.17404 | 3.95122  | 0.46698  | H | 6.23013  | 1.81626  | 2.55127  |
| C  | -0.96139 | 2.75458  | -1.42752 | H | 6.41377  | -0.07804 | 0.99665  |
| C  | 0.34546  | 3.3645   | -1.72773 | C | 2.01427  | 0.61059  | -0.54367 |
| C  | 0.84105  | 4.04269  | -0.57595 | O | 0.90712  | 0.93104  | -0.06601 |
| C  | -2.41173 | 3.00175  | 0.73563  | C | 4.60599  | -1.10838 | -0.71202 |
| C  | -0.18338 | 4.39391  | 1.7944   | H | 3.64933  | -1.61421 | -0.84476 |

|   |          |          |          |
|---|----------|----------|----------|
| H | 4.91566  | -0.7545  | -1.70276 |
| C | 5.60536  | -2.13289 | -0.21411 |
| C | 6.87951  | -2.24249 | -0.78438 |
| C | 5.26216  | -2.99383 | 0.84015  |
| C | 7.79404  | -3.19055 | -0.31477 |
| H | 7.15678  | -1.5814  | -1.60208 |
| C | 6.172    | -3.94121 | 1.31058  |
| H | 4.27463  | -2.91635 | 1.28796  |
| C | 7.44292  | -4.04237 | 0.7345   |
| H | 8.77821  | -3.26298 | -0.77021 |
| H | 5.88988  | -4.60306 | 2.12532  |
| H | 8.15145  | -4.78067 | 1.10016  |
| C | 1.11984  | -2.94988 | 0.36362  |
| O | 1.35103  | -3.10274 | -0.82539 |
| O | 1.83783  | -2.03686 | 1.04559  |
| H | 1.55842  | -1.97891 | 1.97402  |
| C | 0.11425  | -3.74778 | 1.14684  |
| H | 0.64449  | -4.39849 | 1.85166  |
| H | -0.53547 | -3.08027 | 1.71814  |
| H | -0.4822  | -4.35367 | 0.46555  |
| C | 2.07436  | 0.08027  | -1.94482 |
| H | 3.0287   | 0.27829  | -2.43239 |
| H | 1.89955  | -1.00147 | -1.91745 |
| H | 1.26095  | 0.53455  | -2.51612 |

#### Benzyl chloride

Energy: -730.780726 Hartree

Charge: 0

Spin Multiplicity: 1

|   |          |          |          |
|---|----------|----------|----------|
| C | -0.39300 | -2.2236  | 0.06595  |
| C | -0.99553 | -2.67335 | -1.10728 |

|    |          |          |          |
|----|----------|----------|----------|
| C  | -0.64728 | -2.88872 | 1.26391  |
| C  | -1.84307 | -3.77192 | -1.08308 |
| H  | -0.79633 | -2.15397 | -2.04238 |
| C  | -1.49491 | -3.98714 | 1.28920  |
| H  | -0.17576 | -2.53745 | 2.17933  |
| C  | -2.09321 | -4.43031 | 0.11534  |
| H  | -2.31275 | -4.11437 | -2.00063 |
| H  | -1.69213 | -4.49810 | 2.22720  |
| H  | -2.75838 | -5.28890 | 0.13506  |
| C  | 0.52044  | -1.05304 | 0.03776  |
| H  | 0.28640  | -0.35791 | -0.76908 |
| H  | 0.55279  | -0.52305 | 0.99017  |
| Cl | 2.24993  | -1.58643 | -0.27470 |

#### NaOAc

Energy: -390.587774 Hartree

Charge: 0

Spin Multiplicity: 1

|    |          |          |          |
|----|----------|----------|----------|
| C  | 0.6244   | -1.06525 | 0.10592  |
| O  | 1.84157  | -1.1444  | 0.10589  |
| O  | -0.02591 | 0.11535  | 0.1059   |
| C  | -0.32684 | -2.22668 | 0.10597  |
| H  | -0.972   | -2.17367 | 0.98879  |
| H  | -0.97209 | -2.17367 | -0.77679 |
| H  | 0.23038  | -3.16332 | 0.10594  |
| Na | 1.37327  | 1.62727  | 0.10583  |

#### Acetophenone

Energy: -384.55969 Hartree

Charge: 0

Spin Multiplicity: 1

|   |          |          |          |                      |          |          |
|---|----------|----------|----------|----------------------|----------|----------|
| C | 0.20815  | -0.88263 | -0.39549 | Charge: 0            |          |          |
| O | 0.8417   | -0.71154 | -1.42685 | Spin Multiplicity: 3 |          |          |
| C | 0.19931  | 0.15915  | 0.67609  | H                    | -0.14583 | -3.64572 |
| H | -0.82317 | 0.49306  | 0.88228  | C                    | -0.66847 | -0.38935 |
| H | 0.60049  | -0.24693 | 1.61099  | C                    | 0.34291  | -1.35622 |
| H | 0.80399  | 1.01166  | 0.36356  | C                    | 0.67505  | -2.10907 |
| C | -0.57005 | -2.13205 | -0.18547 | C                    | -0.01446 | -1.87855 |
| C | -0.58343 | -3.09966 | -1.19324 | C                    | -1.01386 | -0.88168 |
| C | -1.28843 | -2.36269 | 0.98986  | C                    | -1.35079 | -0.13884 |
| C | -1.30085 | -4.27224 | -1.03072 | H                    | -0.91666 | 0.17993  |
| H | -0.02467 | -2.91974 | -2.10666 | H                    | 0.87489  | -1.52475 |
| C | -2.00624 | -3.53842 | 1.15245  | H                    | 1.45612  | -2.86229 |
| H | -1.29145 | -1.62524 | 1.78634  | H                    | -2.12088 | 0.62573  |
| C | -2.01392 | -4.49276 | 0.14341  | C                    | 0.10153  | -2.57899 |
| H | -1.30684 | -5.01868 | -1.81939 | C                    | -0.90663 | -1.84211 |
| H | -2.56176 | -3.71024 | 2.06938  | C                    | -1.22611 | -2.01785 |
| H | -2.57714 | -5.41273 | 0.27139  | C                    | -2.18295 | -1.17848 |

# Methanol

Energy: -115.584488 Hartree

Charge: 0

Spin Multiplicity: 1

|   |          |          |          |
|---|----------|----------|----------|
| C | 0.26522  | 0.11324  | 0.00000  |
| H | 0.62187  | -0.89557 | 0.00000  |
| H | 0.62189  | 0.61764  | -0.87365 |
| H | -0.80478 | 0.11325  | 0.00000  |
| O | 0.74189  | 0.78734  | 1.16759  |
| H | 0.42356  | 1.69302  | 1.16714  |

# IN5'

Energy: -5423.447983 Hartree

|    |          |          |          |
|----|----------|----------|----------|
| H  | -0.14583 | -3.64572 | -2.26459 |
| C  | -0.66847 | -0.38935 | 1.24896  |
| C  | 0.34291  | -1.35622 | 1.30424  |
| C  | 0.67505  | -2.10907 | 0.16922  |
| C  | -0.01446 | -1.87855 | -1.01667 |
| C  | -1.01386 | -0.88168 | -1.07860 |
| C  | -1.35079 | -0.13884 | 0.05513  |
| H  | -0.91666 | 0.17993  | 2.13958  |
| H  | 0.87489  | -1.52475 | 2.23559  |
| H  | 1.45612  | -2.86229 | 0.22068  |
| H  | -2.12088 | 0.62573  | 0.00778  |
| C  | 0.10153  | -2.57899 | -2.35289 |
| C  | -0.90663 | -1.84211 | -3.20686 |
| C  | -1.22611 | -2.01785 | -4.54924 |
| C  | -2.18295 | -1.17848 | -5.13481 |
| C  | -2.81266 | -0.17818 | -4.38118 |
| C  | -2.50201 | -0.00251 | -3.02888 |
| C  | -1.54727 | -0.84062 | -2.44561 |
| H  | -0.73528 | -2.78711 | -5.13950 |
| H  | -2.43747 | -1.30182 | -6.18395 |
| H  | -3.55022 | 0.46591  | -4.85227 |
| H  | -2.99181 | 0.77190  | -2.44460 |
| Co | 3.16524  | 2.26448  | -1.77459 |
| O  | 4.58991  | 1.49870  | -0.73345 |
| O  | 3.49308  | 3.89689  | -0.64215 |
| Co | 4.20040  | 2.68943  | 0.78020  |
| C  | 7.20421  | -0.67618 | -0.54841 |
| C  | 6.96024  | 0.02378  | 0.67956  |
| C  | 6.27594  | -1.76255 | -0.64722 |

|   |         |          |          |
|---|---------|----------|----------|
| C | 5.43917 | -1.74413 | 0.51645  |
| C | 5.84394 | -0.64938 | 1.35274  |
| C | 8.20567 | -0.22913 | -1.42503 |
| C | 7.70160 | 1.14906  | 1.01155  |
| H | 6.21021 | -2.47278 | -1.46328 |
| C | 4.37103 | -2.56830 | 0.90494  |
| C | 5.17818 | -0.38760 | 2.54319  |
| C | 8.94680 | 0.90406  | -1.07874 |
| H | 8.39543 | -0.75216 | -2.35855 |
| C | 8.69900 | 1.58600  | 0.12300  |
| H | 7.49967 | 1.69641  | 1.92731  |
| C | 3.71966 | -2.30251 | 2.11271  |
| H | 4.05904 | -3.39874 | 0.27756  |
| C | 4.11347 | -1.22455 | 2.92051  |
| H | 5.46342 | 0.45682  | 3.16379  |
| H | 9.72408 | 1.26340  | -1.74736 |
| H | 9.28573 | 2.46651  | 0.37019  |
| H | 2.89605 | -2.93567 | 2.42867  |
| H | 3.58502 | -1.03077 | 3.84963  |
| H | 2.65381 | 4.31054  | -0.39395 |
| H | 1.11128 | -2.53253 | -2.77691 |
| C | 2.91234 | 0.77234  | -2.97344 |
| C | 3.61366 | -0.43259 | -3.12789 |
| C | 1.84441 | 1.01087  | -3.88269 |
| C | 3.27473 | -1.34332 | -4.13587 |
| H | 4.44678 | -0.66702 | -2.46837 |
| C | 1.48573 | 0.09516  | -4.88866 |
| C | 2.21285 | -1.08441 | -5.01672 |
| H | 3.84145 | -2.26630 | -4.23982 |
| H | 0.65430 | 0.29854  | -5.55709 |
| H | 1.95697 | -1.80331 | -5.78922 |

|    |          |         |          |
|----|----------|---------|----------|
| C  | 1.18982  | 2.29587 | -3.67987 |
| C  | -0.01379 | 2.73505 | -4.44978 |
| H  | 0.20466  | 2.73747 | -5.52337 |
| H  | -0.83166 | 2.02301 | -4.28925 |
| H  | -0.32367 | 3.73273 | -4.13443 |
| O  | 1.67187  | 3.06124 | -2.79923 |
| H  | 4.46940  | 0.55366 | -0.56977 |
| C  | 2.39353  | 1.64691 | 1.78946  |
| H  | 2.48436  | 0.74735 | 1.18608  |
| H  | 2.79584  | 1.60125 | 2.79730  |
| C  | 1.35765  | 2.58293 | 1.48759  |
| C  | 1.03419  | 3.64175 | 2.37820  |
| C  | 0.65804  | 2.50553 | 0.25295  |
| C  | 0.05814  | 4.57158 | 2.04376  |
| H  | 1.56595  | 3.71567 | 3.32287  |
| C  | -0.30872 | 3.44273 | -0.07827 |
| H  | 0.90669  | 1.70534 | -0.43642 |
| C  | -0.61522 | 4.47984 | 0.81593  |
| H  | -0.18331 | 5.37464 | 2.73423  |
| H  | -0.82535 | 3.37109 | -1.03087 |
| H  | -1.37397 | 5.21293 | 0.55775  |
| Cl | 5.28306  | 3.49488 | 2.69996  |

**[Co( $\eta^1$ -fluorenyl)(MeOH)<sub>2</sub>]**

Energy: -877.154844 Hartree

Charge: 0

Spin Multiplicity: 1

|    |          |          |          |
|----|----------|----------|----------|
| Co | 0.740988 | -3.33548 | -3.8844  |
| O  | 1.85889  | -1.42643 | -4.32559 |
| O  | 2.329888 | -3.85527 | -2.56478 |
| H  | 1.209767 | -0.92514 | -4.84669 |
| C  | 2.164513 | -0.66808 | -3.14372 |
| H  | 2.868767 | -1.26372 | -2.56062 |

|   |          |          |          |
|---|----------|----------|----------|
| H | 2.631365 | 0.289555 | -3.40328 |
| H | 1.266068 | -0.4833  | -2.54488 |
| C | 2.763244 | -5.22881 | -2.57295 |
| H | 3.672506 | -5.34766 | -1.97424 |
| H | 1.978892 | -5.89397 | -2.19436 |
| H | 2.977483 | -5.48196 | -3.61271 |
| H | -1.75809 | -4.04765 | -4.2861  |
| C | -1.77595 | 0.312229 | -1.7956  |
| C | -1.9571  | -0.96022 | -1.20637 |
| C | -1.82323 | -2.12442 | -1.95539 |
| C | -1.50603 | -2.03869 | -3.32823 |
| C | -1.37231 | -0.73964 | -3.93239 |
| C | -1.48614 | 0.42318  | -3.15312 |
| H | -1.8744  | 1.206353 | -1.18541 |
| H | -2.20028 | -1.02771 | -0.1484  |
| H | -1.94914 | -3.09825 | -1.48636 |
| H | -1.36073 | 1.402849 | -3.60991 |
| C | -1.26946 | -3.07299 | -4.33484 |
| C | -1.10293 | -2.35396 | -5.59367 |
| C | -0.94834 | -2.80862 | -6.92078 |
| C | -0.76538 | -1.88796 | -7.94714 |
| C | -0.72449 | -0.49909 | -7.68675 |
| C | -0.90173 | -0.02253 | -6.39045 |
| C | -1.1171  | -0.93455 | -5.34221 |
| H | -0.9614  | -3.87536 | -7.13553 |
| H | -0.64528 | -2.24157 | -8.96867 |
| H | -0.56656 | 0.197918 | -8.50562 |
| H | -0.89139 | 1.047195 | -6.19113 |
| H | 2.132219 | -3.59448 | -1.65349 |

### [Co( $\eta^5$ -fluorenyl)]

Energy: -645.714452 Hartree

Charge: 0

Spin Multiplicity: 1

|    |          |          |          |
|----|----------|----------|----------|
| Co | 0.508418 | -1.03947 | 1.127521 |
| C  | -1.29921 | -0.61033 | -0.58836 |
| C  | -0.90675 | 0.692518 | -0.12446 |
| C  | -0.09309 | -1.41344 | -0.76955 |
| C  | 1.049879 | -0.51779 | -0.68881 |
| C  | 0.556302 | 0.718564 | -0.08761 |
| C  | -2.66032 | -0.92558 | -0.69868 |
| C  | -1.87348 | 1.641351 | 0.226042 |
| H  | -0.0834  | -2.39815 | -1.22572 |
| C  | 2.439552 | -0.66164 | -0.96762 |
| C  | 1.476335 | 1.765365 | 0.205773 |
| C  | -3.61476 | 0.039776 | -0.35821 |
| H  | -2.96972 | -1.9084  | -1.04676 |

|   |          |          |          |
|---|----------|----------|----------|
| C | -3.22736 | 1.309439 | 0.101134 |
| H | -1.5766  | 2.625517 | 0.580496 |
| C | 3.295933 | 0.386305 | -0.6775  |
| H | 2.807583 | -1.57418 | -1.42994 |
| C | 2.816337 | 1.591156 | -0.08718 |
| H | 1.119149 | 2.69864  | 0.63465  |
| H | -4.67201 | -0.19523 | -0.45393 |
| H | -3.98719 | 2.044166 | 0.354883 |
| H | 4.356666 | 0.289549 | -0.89446 |
| H | 3.522043 | 2.389707 | 0.127767 |

### [Co( $\eta^5$ -fluorenyl)(acetophenone)]

Energy: -1029.897016 Hartree

Charge: 0

Spin Multiplicity: 1

|    |          |          |          |
|----|----------|----------|----------|
| Co | -1.6699  | 2.094145 | 0.240495 |
| C  | -1.63381 | 3.649607 | -1.00061 |
| C  | -2.32709 | 2.620593 | -1.71859 |
| C  | -3.45613 | 2.225884 | -0.91333 |
| C  | -3.57293 | 3.16097  | 0.197881 |
| C  | -2.46697 | 4.069161 | 0.109477 |
| H  | -0.7118  | 4.133444 | -1.31101 |
| C  | -1.99184 | 1.869008 | -2.87074 |
| C  | -4.25668 | 1.12651  | -1.30313 |
| C  | -4.4693  | 3.236066 | 1.280177 |
| C  | -2.26866 | 5.031832 | 1.121871 |
| H  | -1.13054 | 2.15265  | -3.47323 |
| C  | -2.78022 | 0.794985 | -3.2127  |
| C  | -3.91015 | 0.428445 | -2.43551 |
| H  | -5.12723 | 0.8444   | -0.71301 |
| H  | -5.3059  | 2.542055 | 1.348595 |
| C  | -4.27004 | 4.209159 | 2.238788 |
| H  | -1.42281 | 5.714654 | 1.068155 |
| C  | -3.17534 | 5.09861  | 2.159511 |
| H  | -2.54101 | 0.214488 | -4.10124 |
| H  | -4.51243 | -0.42149 | -2.75005 |
| H  | -4.96317 | 4.293016 | 3.073039 |
| H  | -3.04662 | 5.848671 | 2.937197 |
| C  | -3.4286  | -1.20888 | 1.198812 |
| C  | -3.08472 | -0.13968 | 1.994314 |
| C  | -1.87707 | 0.562868 | 1.780581 |
| C  | -1.02175 | 0.160764 | 0.708769 |
| C  | -1.37574 | -0.97898 | -0.06792 |
| C  | -2.54912 | -1.64528 | 0.181432 |
| H  | -4.35886 | -1.74492 | 1.372816 |



|   |          |          |          |
|---|----------|----------|----------|
| H | -3.72961 | 0.160787 | 2.818333 |
| H | -1.51911 | 1.255673 | 2.539979 |
| H | -0.7091  | -1.32064 | -0.85694 |
| H | -2.81    | -2.51793 | -0.41423 |
| C | 0.006746 | 1.117741 | 0.310574 |
| C | 0.938233 | 0.899431 | -0.83489 |
| H | 1.809377 | 0.312253 | -0.51386 |
| H | 0.463222 | 0.365485 | -1.66446 |
| H | 1.297227 | 1.869524 | -1.19629 |
| O | 0.119085 | 2.175306 | 1.058731 |

### IN3a

H -0.51047700 0.36864700 -2.56267700  
 C 3.32437900 2.08441400 -5.26153600  
 C 2.69126300 2.80091700 -4.22967300  
 C 1.71406600 2.20251500 -3.43226900  
 C 1.35511500 0.86822500 -3.67159300  
 C 1.98564100 0.15163300 -4.73304900  
 C 2.97369400 0.75736700 -5.51694700  
 H 4.08885900 2.56890400 -5.86314000  
 H 2.97175100 3.83531000 -4.04733400  
 H 1.25168500 2.75710800 -2.62014200  
 H 3.45984700 0.20326800 -6.31642000  
 C 0.43176100 -0.02431300 -2.95523500  
 C 0.44512400 -1.27800900 -3.72165000  
 C -0.24450700 -2.48283200 -3.51842100  
 C 0.04128000 -3.58165300 -4.33384000  
 C 1.00583700 -3.49257200 -5.35172300  
 C 1.70020400 -2.29933300 -5.56923800  
 C 1.42278200 -1.19241500 -4.76120200  
 H -0.98491200 -2.56312500 -2.72529100  
 H -0.48558700 -4.51930500 -4.17636100  
 H 1.21868300 -4.36167000 -5.96809000  
 H 2.44991500 -2.23515100 -6.35434600  
 Co 1.37189200 -0.63639600 -1.24004000

O 1.69110700 -1.56408000 0.55500200  
 O 1.70370700 1.07754000 -0.25966400  
 Co 2.83513600 0.01055800 0.92105100  
 C 4.93796200 0.19699800 1.96023700  
 C 5.86987600 -0.37111100 1.02176900  
 C 4.31155800 1.37423000 1.36727500  
 C 5.01679200 1.59403300 0.09939500  
 C 5.93504500 0.52244000 -0.12815900  
 C 4.65267800 -0.49368200 3.15678200  
 C 6.49725800 -1.58696700 1.29655400  
 H 3.91281900 2.19643700 1.95887500  
 C 4.86686900 2.59046800 -0.87496200  
 C 6.68531600 0.46061300 -1.30610700  
 C 5.29682500 -1.70704300 3.41476900  
 H 3.94816600 -0.07604000 3.87206100  
 C 6.21124500 -2.24820200 2.49628500  
 H 7.19855900 -2.01770400 0.58601800  
 C 5.62679500 2.52117300 -2.04482200  
 H 4.16053100 3.40331700 -0.72614500  
 C 6.53301200 1.46822300 -2.26110200  
 H 7.37964600 -0.35894500 -1.47491500  
 H 5.09049800 -2.23607700 4.34151700  
 H 6.69951000 -3.19296900 2.71943200  
 H 5.51384000 3.29153200 -2.80278600  
 H 7.11224400 1.43631600 -3.17982000  
 H 0.89652400 1.31923200 0.22133500  
 H 2.26408100 -3.13361300 -0.89233900  
 C 2.62334300 -3.84245100 -1.63134300  
 C 2.22606400 -5.17157900 -1.54100500  
 C 3.49953300 -3.40617900 -2.64097300  
 C 2.70447600 -6.10079900 -2.47957000

H 1.55454000 -5.47455900 -0.74684800  
 C 3.98610600 -4.35881400 -3.56231800  
 C 3.59339800 -5.68395200 -3.48724700  
 H 4.66422300 -4.06259000 -4.35475400  
 H 3.95486700 -6.41899300 -4.19932400  
 C 3.88139700 -1.98603300 -2.72495600  
 C 4.95717600 -1.56144500 -3.69022500  
 H 5.89299700 -2.09191000 -3.48430700  
 H 4.65782500 -1.80770200 -4.71411900  
 H 5.11368400 -0.48739900 -3.60689900  
 O 3.34347400 -1.11529100 -2.01521400  
 H 0.88504800 -1.48349400 1.08730900  
 C 1.46439900 -7.90995800 -1.50533300  
 H 1.34678100 -8.97356100 -1.71827400  
 H 1.86853100 -7.78234700 -0.49482400  
 H 0.49113500 -7.41205400 -1.58079300  
 O 2.37649700 -7.41571000 -2.49508200

#### IN4a

H -1.62345300 -1.84830300 0.61351000  
 C 1.21855900 2.08981100 0.76756000  
 C 1.26290000 1.10234600 1.76324200  
 C 0.63608800 -0.13642800 1.56891400  
 C -0.04343900 -0.36841100 0.37655300  
 C -0.09029000 0.62688800 -0.62420900  
 C 0.54555100 1.85861300 -0.43581400  
 H 1.71663200 3.04112000 0.93304800  
 H 1.79358000 1.29771100 2.69021300  
 H 0.68081300 -0.90083500 2.34024300  
 H 0.51255300 2.62303500 -1.20732700  
 C -0.80667600 -1.59495300 -0.07429700

C -1.31153300 -1.19086000 -1.44162600  
 C -2.07311400 -1.91564200 -2.35227700  
 C -2.40103200 -1.32691700 -3.58022800  
 C -1.96650600 -0.03120400 -3.89082200  
 C -1.19739500 0.70050600 -2.98116700  
 C -0.87561000 0.11513200 -1.75419200  
 H -2.40123000 -2.92562300 -2.12121900  
 H -2.99090600 -1.88361500 -4.30309600  
 H -2.22777900 0.40778400 -4.84974000  
 H -0.85295000 1.70130200 -3.22656200  
 Co 2.55319400 -0.96352800 -1.85963500  
 O 2.99754700 -1.89015400 -0.22210500  
 O 3.60537100 0.54262300 -1.07052800  
 Co 3.87529000 -0.35576700 0.62849900  
 C 5.16491400 -0.25195200 2.33071300  
 C 6.44739300 -0.79788700 1.93949100  
 C 4.98720700 1.04580600 1.71873300  
 C 6.26247200 1.35660000 1.06845500  
 C 7.14501200 0.23944300 1.18874800  
 C 4.20576000 -1.09531700 2.94172200  
 C 6.75931400 -2.12094900 2.21741000  
 H 4.31435600 1.81466000 2.08906600  
 C 6.67822800 2.49055700 0.36042100  
 C 8.40879400 0.25768200 0.59223400  
 C 4.55563800 -2.43499600 3.21218600  
 H 3.25437100 -0.69690100 3.28421100  
 C 5.80913800 -2.93641200 2.86286500  
 H 7.72064500 -2.53413700 1.92229500  
 C 7.94633800 2.49998700 -0.22754900  
 H 6.01999400 3.35076600 0.26342300  
 C 8.80641100 1.39376200 -0.11701300

H 9.07200400 -0.59957900 0.67870900  
H 3.83694200 -3.07877900 3.71201700  
H 6.05436400 -3.97175800 3.08209100  
H 8.27353700 3.37724400 -0.78010900  
H 9.78720800 1.42517300 -0.58354800  
H 3.05292800 1.32815200 -0.94549100  
H -0.15904200 -2.47892100 -0.13422300  
C 1.60230500 -2.40576500 -2.72209000  
C 1.27611800 -3.68892600 -2.29256000  
C 1.18872500 -2.03447700 -4.03638000  
C 0.55069900 -4.57247600 -3.11382500  
H 1.56902500 -4.04219000 -1.30593000  
C 0.47936100 -2.91925200 -4.86747200  
C 0.15404200 -4.19107800 -4.41236400  
H 0.17139000 -2.61973000 -5.86573900  
H -0.39904100 -4.86904900 -5.05022500  
C 1.54105800 -0.67905700 -4.39467600  
C 1.21527500 -0.06561000 -5.72121200  
H 1.76810000 -0.58639700 -6.51209400  
H 0.14924000 -0.17413700 -5.94135800  
H 1.48756900 0.99128700 -5.72577000  
O 2.16549400 0.01362700 -3.53729900  
H 2.18877000 -2.16103700 0.23437500  
C 6.14510100 -2.67697300 -2.74974100  
Cl 5.54537700 -1.76890500 -4.30351800  
C 6.25091000 -1.62859700 -1.65115700  
H 5.29641300 -1.12488400 -1.49111700  
H 6.53729800 -2.12529000 -0.71774200  
H 7.00829100 -0.87661800 -1.88651200  
C 7.49727000 -3.28699000 -3.09618100  
H 7.87570000 -3.81541700 -2.21278700

H 7.41376400 -4.00607500 -3.91594200  
H 8.22351000 -2.51705800 -3.37121000  
C 5.09572000 -3.73527700 -2.43743200  
H 5.40241100 -4.27497000 -1.53332200  
H 4.12074700 -3.28190900 -2.25243000  
H 5.00272500 -4.45695600 -3.25428600  
C -0.47855300 -6.73727800 -3.33034300  
H 0.05074200 -7.01861400 -4.24794800  
H -0.58332900 -7.61455000 -2.68965400  
H -1.47246700 -6.34952800 -3.58183400  
O 0.27239500 -5.78629000 -2.56659800

#### IN5a

H -4.06742200 -0.24084900 -1.98232400  
C 0.11030500 -2.55784900 -2.71864900  
C -0.22678600 -1.43884900 -3.49190100  
C -1.29354500 -0.60879300 -3.11565000  
C -2.00495300 -0.89536400 -1.95407000  
C -1.64566400 -2.00195100 -1.15248000  
C -0.59263500 -2.84807700 -1.53367700  
H 0.92301900 -3.20760300 -3.02961800  
H 0.33445500 -1.22072900 -4.39559700  
H -1.56109600 0.24874300 -3.72745700  
H -0.34683200 -3.73056800 -0.94780600  
C -3.18095300 -0.17234700 -1.33957400  
C -3.40389300 -0.93501900 -0.05489400  
C -4.34560600 -0.72311800 0.94748400  
C -4.36292600 -1.58308500 2.05194300  
C -3.45315100 -2.64645500 2.15039700  
C -2.51758000 -2.87683800 1.13861700  
C -2.50370300 -2.01741800 0.03488900

|                                       |                                       |
|---------------------------------------|---------------------------------------|
| H -5.05038600 0.10022000 0.87826600   | H -2.97793000 0.88959000 -1.16637400  |
| H -5.08958600 -1.42589200 2.84352300  | C -1.39155400 2.00196300 0.92883900   |
| H -3.48308700 -3.30121000 3.01673800  | C -1.46167600 2.84176000 -0.18375700  |
| H -1.82170700 -3.70941800 1.20337100  | C -2.43172500 2.07286700 1.89354900   |
| Co -0.21610400 0.56072700 1.30856700  | C -2.54242600 3.72929600 -0.33062700  |
| O 0.63074300 0.50095400 -0.46975800   | H -0.68411100 2.81070000 -0.93716700  |
| O 0.58102600 -1.31553900 1.65673400   | C -3.50714300 2.97655100 1.75281700   |
| Co 1.20540400 -1.44061500 -0.18899500 | C -3.56078500 3.80287300 0.64759800   |
| C 4.20932100 -1.45958500 -1.46004600  | H -4.29835600 3.01746800 2.49619400   |
| C 4.86721900 -0.42185300 -0.71588900  | H -4.37557500 4.50383200 0.49755700   |
| C 4.10192800 -2.62287300 -0.62104500  | C -2.30846300 1.10123000 2.94995000   |
| C 4.66472400 -2.30377100 0.65669000   | C -3.26170100 0.98938000 4.09573700   |
| C 5.15007500 -0.95467100 0.62045100   | H -3.13272300 1.86129300 4.74935300   |
| C 3.77403500 -1.22147700 -2.77459000  | H -4.29724400 0.99233700 3.74651100   |
| C 5.11077700 0.81633700 -1.29897900   | H -3.06354700 0.08041200 4.66572000   |
| H 3.66773900 -3.57364600 -0.90879900  | O -1.31695500 0.31393400 2.89991300   |
| C 4.77419600 -3.06083000 1.83473000   | H -0.11697200 0.49954100 -1.09075200  |
| C 5.73401600 -0.38419100 1.74218300   | C 1.21065200 1.68178700 2.13283300    |
| C 4.02104200 0.03017000 -3.35005000   | Cl 1.88180800 3.87534100 -2.82190100  |
| H 3.25959100 -1.99696000 -3.33454900  | C -5.46938900 -2.72856500 -1.81966300 |
| C 4.69287100 1.03358400 -2.62790300   | O -6.12180400 -1.64453300 -1.87258800 |
| H 5.61867200 1.60397100 -0.74909100   | O -4.49119800 -3.03884000 -2.56165900 |
| C 5.35661500 -2.47153100 2.95962000   | C -5.87090700 -3.75510700 -0.75079100 |
| H 4.41014800 -4.08410600 1.86893200   | H -6.01536700 -4.74019600 -1.20859700 |
| C 5.83240600 -1.15174500 2.91555200   | H -5.05699600 -3.85362000 -0.02356100 |
| H 6.10202000 0.63758800 1.72137000    | H -6.78188500 -3.46211800 -0.22200400 |
| H 3.70050100 0.22896800 -4.36839300   | Na 2.20147000 1.74997900 -1.46573700  |
| H 4.89268000 1.99042800 -3.10112900   | C 2.48732200 0.86421000 1.92200200    |
| H 5.44579900 -3.04146000 3.87987700   | H 2.62697400 0.54928100 0.88344400    |
| H 6.28288100 -0.71543100 3.80233700   | H 3.36669600 1.46293000 2.20080300    |
| H -0.16227500 -1.90515600 1.85562400  | H 2.49247500 -0.04114700 2.53029100   |

C 1.33721100 3.05877400 1.48511900  
H 2.27034800 3.54248700 1.81311600  
H 1.35107700 3.02141500 0.39309200  
H 0.50721100 3.71464500 1.75846300  
C 0.93095800 1.83810000 3.62391000  
H 0.82455900 0.87088000 4.12289800  
H 1.77009100 2.36981100 4.10090400  
H 0.02416700 2.42186500 3.80680000  
C -1.76137500 4.49640900 -2.46528500  
H -1.75475900 3.49853600 -2.91919600  
H -2.10243100 5.22816600 -3.19950100  
H -0.75030300 4.74849000 -2.13225200  
O -2.70698200 4.56144400 -1.38719200

#### IN6a

H -3.30371900 -2.57263200 -1.81195200  
C -6.55064600 -0.31794000 1.32582600  
C -6.11966300 -1.66543000 1.42501300  
C -5.24281200 -2.21247200 0.50422200  
C -4.77416500 -1.40885200 -0.56754200  
C -5.22282500 -0.03881600 -0.66602300  
C -6.11369500 0.49299500 0.29141700  
H -7.23917100 0.07617900 2.06807500  
H -6.49202000 -2.28114100 2.23954200  
H -4.93283800 -3.24982600 0.58185200  
H -6.45378900 1.52151500 0.20663600  
C -3.77732300 -1.62543400 -1.58621200  
C -3.81383100 -0.47516400 -2.47857600  
C -3.09127400 -0.17603000 -3.64978300  
C -3.22634300 1.08564500 -4.22143700  
C -4.05523200 2.06862900 -3.64007700

C -4.76589100 1.80009500 -2.47271800  
C -4.65790300 0.52841000 -1.89120200  
H -2.44059400 -0.92266800 -4.09735000  
H -2.68451900 1.32030900 -5.13404600  
H -4.14036800 3.04369700 -4.11154100  
H -5.39792100 2.55937200 -2.01978700  
Co -2.89240600 -0.25661300 -0.25585400  
O -0.98863700 -0.37067600 -0.62047900  
O -2.40095200 1.35065700 0.74142800  
Co -0.63503700 1.45866500 -0.06230200  
C -0.62916800 -1.74103200 2.43054200  
C 0.58360800 -2.17158900 1.84863600  
C -0.35933300 -0.65145200 3.44474700  
C 1.14475400 -0.49937300 3.38152300  
C 1.68422700 -1.39558200 2.43273400  
C -1.83717100 -2.31492100 2.04448900  
C 0.59455100 -3.18398300 0.88562900  
H -0.70402100 -0.93050000 4.44898300  
C 1.97775500 0.36384600 4.08727800  
C 3.06006200 -1.43043400 2.18574800  
C -1.82384000 -3.33231100 1.07937300  
H -2.77865000 -1.97901900 2.47199700  
C -0.62004100 -3.76126000 0.50630700  
H 1.52873900 -3.51551700 0.44286100  
C 3.35737300 0.32214900 3.84599200  
H 1.56590600 1.06247900 4.81068900  
C 3.89189700 -0.56649500 2.90321800  
H 3.47410700 -2.10904400 1.44585900  
H -2.75637000 -3.79294500 0.77140800  
H -0.63202800 -4.55174800 -0.23944100  
H 4.01900200 0.99078100 4.38996900

|                                       |                                      |
|---------------------------------------|--------------------------------------|
| H 4.96302000 -0.57757800 2.72045300   | C 2.50975000 1.83681600 0.75910500   |
| H -2.30022400 1.20251200 1.69269800   | H 3.54212400 1.72277000 1.07617400   |
| H -0.80239400 -0.47389800 -1.56542200 | H 2.22094700 2.88833300 0.71987700   |
| C 2.53188300 -1.07642100 -1.29104300  | H 1.86135500 1.35119200 1.49607200   |
| C 3.24931500 -2.23716400 -1.55117800  | H -0.86338600 0.28722100 3.19006200  |
| C 4.64075900 -2.14101800 -1.64953900  | O 5.47557800 -3.19332400 -1.85511500 |
| C 5.26309700 -0.88639500 -1.56053700  | C 6.29402300 1.57955400 -2.64615700  |
| C 4.56097200 0.29680300 -1.32787300   | H 6.81713000 2.53721900 -2.73923100  |
| C 3.15558100 0.17751900 -1.12676800   | H 7.05775900 0.80185600 -2.56997800  |
| H 1.46016800 -1.14650600 -1.13745900  | H 5.72679600 1.41121000 -3.56811600  |
| H 2.73036100 -3.18262700 -1.64438600  | C 4.45503800 2.86422900 -1.61105500  |
| H 6.33665600 -0.87022400 -1.70683900  | H 3.73928500 2.71666600 -2.42711600  |
| C 2.22241900 1.17521500 -0.55478100   | H 3.90857500 3.14789400 -0.71295000  |
| O 1.09059500 1.29022800 -1.07104900   | H 5.08129300 3.72325500 -1.87291900  |
| C 5.35299300 1.62528400 -1.41447100   | C 6.21499600 1.79703700 -0.14404700  |
| C -0.22363400 3.52553300 1.74580700   | H 6.91475700 0.96244400 -0.02976400  |
| O -0.36397600 3.30123700 0.47975500   | H 6.79825100 2.72292400 -0.20615000  |
| O -0.22057700 2.63775300 2.62401700   | H 5.60073600 1.84573900 0.75999800   |
| C 0.00501600 4.97570400 2.13032500    | C 4.90341100 -4.50307600 -1.95333900 |
| H -0.46834800 5.65791100 1.42028900   | H 4.22569500 -4.57758800 -2.81154100 |
| H -0.36540600 5.16502900 3.14061300   | H 5.74422800 -5.18401700 -2.09459300 |
| H 1.08461500 5.17031100 2.12236800    | H 4.36682300 -4.77066700 -1.03556700 |

**14. Electronic energies and transition frequencies for all intermediates, transition states, and substrates.**

| Catalyst Structures |              | Oxidative Addition    |              | Catalyst Regeneration |              |
|---------------------|--------------|-----------------------|--------------|-----------------------|--------------|
| IN0                 | -1958.417865 | IN4                   | -5423.452704 | TS[7-8]               | -4801.135008 |
| IN1                 | -4379.859869 | TS[4-5]               | -5423.434554 | Imaginary frequency   | -270.39      |
| IN1a                | -4148.685235 | Imaginary frequency   | -170.67      | IN8                   | -4801.149725 |
| IN1b                | -3917.503963 | IN5                   | -5423.451825 | Other Substrates      |              |
|                     |              | IN5'                  | -5423.447983 |                       |              |
| C-H Activation      |              | Reductive Elimination |              | MeOH                  | -115.584488  |
| IN2                 | -4302.076145 | IN6                   | -4801.154161 | Benzyl chloride       | -730.780726  |
| TS[2-3]             | -4302.046447 | TS[6-7]               | -4801.123586 | Acetophenone          | -384.55969   |
| Imaginary frequency | -1232.52     | Imaginary frequency   | -327.02      | Sodium acetate        | -390.587774  |
| IN3                 | -4302.094146 | IN7                   | -4801.154526 | NaCl                  | -622.314724  |

**15. References:**

1. M. J. Frisch, G. W. Trucks, H. B. Schlegel, et al. *Gaussian Inc.*, Wallingford, CT, 2019.
2. C. Lee, W. Yang, and R. G. Parr. *Phys. Rev. B* 1988, **37**, 785.
3. A. D. Becke. *J. Chem. Phys.* 1993, **98**, 5648.
4. A. D. Becke. *Phys. Rev. A.* 1988, **38**, 3098.
5. T. Sperger, I. A. Sanhueza, K. Kalvet, and F. Schoenebeck. *Chem. Rev.* 2015, **115**, 9532.
6. N. J. Henson, P. J. Hay, and A. Redondo. *Inorg. Chem.* 1999, **38**, 1618.
7. M. D. Su and S. Y. Chu. *Organometallics*, 1997, **16**, 1621.
8. W. J. Hehre, R. Ditchfield, and J. A. Pople. *J. Chem. Phys.* 1972, **56**, 2257.
9. Y. Zhao, N. E. Schultz, and D. G. Truhlar. *Theor. Chem. Acc.* 2006, **120**, 215.
10. Y. Wang, P. Verma, X. Jin, and D. G. Truhlar, X. He. *PNAS*, 2018, **115**, 10257.
11. P. C. Hariharan and J. A. Pople. *Theoret. Chim. Acta.* 1973, **28**, 213.
12. P. J. Hay and W. R. Wadt. *J. Chem. Phys.* 1985, **82**, 299.
13. S. Grimme, J. Antony, S. Ehrlich and H. Krieg. *J. Chem. Phys.* 2010, **132**, 154104.
14. A. V. Marenich, C. J. Cramer, and D. G. Truhlar. *J. Phys. Chem. B* 2009, **113**, 6378.
15. K. Fukui. *Acc. Chem. Res.* 1981, **14**, 363.
16. CYLview20; Legault, C. Y. Université de Sherbrooke, **2020** (<http://www.cylview.org>).
17. E. D. Glendening, A. E., Reed, J. E., Carpenter et al. NBO Version 3.1.

18. F. Weinhold, C. R. Landis and E. D. Glendening. *Int. Rev. Phys. Chem.* 2016, **35**, 399.
19. S. Kozuch. *WIREs Comput. Mol. Sci.* 2012, **2**, 795.
20. S. Kozuch and S. Shaik. *J. Phys. Chem. A* 2008, **112**, 6032.
21. S. Kozuch and S. Shaik. *Acc. Chem. Res.* 2011, **44**, 101.
22. <https://www.basissetexchange.org/> (Accessed on 1<sup>st</sup> November 2025).
